# Supplementary material for: The role and proteomic analysis of ethylene in hydrogen gas-induced adventitious rooting development in cucumber (Cucumis sativus L.) explants
Source: PeerJ. 2020 Apr 7;8:e8896. doi: 10.7717/peerj.8896 (PMC7147439; doi:10.7717/peerj.8896)
Supplement: Supplemental Information 5 [file peerj-08-8896-s011.xls]

## Sheet: HRW
	0 (Control)	1	10	50	100
	4.88889	3.28571	4.375	7.375	6.22222
	4.25	3.33333	4.16667	6.8	5.57143
	4.5	4	4.625	5.75	6.2
	0 (Control)	1	10	50	100
average	4.75	3.54	4.81	6.14	5.75979
standard deviation	0.321951	0.399357	0.229482	0.823989	0.369488
0 (Control)	4.88889
0 (Control)	4.25
0 (Control)	4.5
0.01	3.28571
0.01	3.33333
0.01	4
0.1	4.375
0.1	4.16667
0.1	4.625
0.5	7.375
0.5	6.8
0.5	5.75
1	6.22222
1	5.57143
1	6.2

## Sheet: ETH
root number	0 (Control)	0.1µmol/L	0.5µmol/L	1µmol/L	10µmol/L	50µmol/L
1	5	5.375	6.54545	6	4.71429	3.5
2	4.9	5.28571	6.6	6	5	3.3
3	5.1	5.45455	6.375	5.5	5	3.6
	0 (Control)	0.1	0.5	1	10	50
average	5	5.37175	6.50682	5.83333	4.90476	3.46667
standard deviation	0.1	0.0844624	0.11737	0.288675	0.164957	0.152753
0 (Control)	5
0 (Control)	4.9
0 (Control)	5.1
0.1	5.375
0.1	5.28571
0.1	5.45455
0.5	6.54545
0.5	6.6
0.5	6.375
1	6
1	6
1	5.5
10	4.71429
10	5
10	5
50	3.5
50	3.3
50	3.6

## Sheet: AgNO3 and NaNO3
AgNO3	0 (Control)	0.1	0.3	0.5		NaNO3	0 (Control)	0.1	0.3	0.5
	7.43	6.71	3.83	1.67			6.5	8.14	7.14	5.2
	7.5	7.43	3.4	2			7.5	8.5	6.83	7.57
	6.5	6.17	5.29	0.17			7.43	6.4	8.33	6.33
standard deviation	0.558241	0.632139	0.990673	0.975346		standard deviation	0.0494975	1.12303	0.791854	1.18543
	0 (Control)	0.1	0.3	0.5			0 (Control)	0.1	0.3	0.5
average root NO.	7.14333	6.77	4.17333	1.28		average root NO.	7.465	7.68	7.43333	6.36667
CK	7.43					CK	7.43
CK	7.5					CK	7.5
CK	6.5					CK	6.5
0.1	6.71					0.1	8.14
0.1	7.43					0.1	8.5
0.1	6.17					0.1	6.4
0.3	3.83					0.3	7.14
0.3	3.4					0.3	6.83
0.3	5.29					0.3	8.33
0.5	1.67					0.5	5.2
0.5	2					0.5	7.57
0.5	0.17					0.5	6.33
	0 (Control)	0.1	0.3	0.5
AgNO₃	7.14333	6.77	4.17333	1.28
NaNO₃	7.14333	7.38	7.43333	6.36667
standard deviation	0.558241	0.632139	0.990673	0.975346
standard deviation	0.558241	1.12303	0.791854	1.18543

## Sheet: AVG
	0 (Control)	0.1	1	5	10
6.4	5.14	4.5	3.77778	1.1	0
5.38	5.38	4.57	3.364	0.6	0.0909091
5.6	5.02	4.2	3.83333	0.555556	0.1
	0 (Control)	0.1	1	5	10
average root NO.	5.18	4.42333	3.65837	0.751852	0.064
standard deviation	0.1833	0.19655	0.25813	0.30089	0.10017
0 (Control)	5.14
0 (Control)	5.38
0 (Control)	5.02
0.1	4.5
0.1	4.57
0.1	4.2
1	3.77778
1	3.364
1	3.83333
5	1.1
5	0.6
5	0.555556
10	0
10	0.0909091
10	0.2

## Sheet: ETH related-genes
	Actin	ACS3	∆Ct	∆∆Ct	2^-∆∆Ct	Standerd	AVE
0	32.31	26.54	-5.77
	30.77	26.33	-4.44	-4.58
	30.07	26.54	-3.53
50	34.07	26.44	-7.63	-7.63	198.088
	34.47	26.54	-7.93	-7.93	243.875	55.4968	274.882
	32.87	24.29	-8.58	-8.58	382.681
	Actin	ACO1	∆Ct	∆∆Ct	2^-∆∆Ct	Standerd
0	32.31	20.21	-12.1
	30.77	20.22	-10.55	-10.84
	30.07	20.2	-9.87
50	34.07	20.32	-13.75	-13.75	13777.2
	34.47	20.8	-13.67	-13.67	13034.1	1596.67	11823.5
	32.87	19.79	-13.08	-13.08	8659.09
Control	1
CsACS3	11.4929				Control	50% HRW	standard deviation
Control	1			CsACS3	1	11.4929	2.32034
CsACO1	6.4503			CsACO1	1	6.4503	0.871063
		CsACS3	CsACO1	standard deviation
	Control	1	1	2.32034
	50% HRW	11.4929	6.4503	0.871063

## Sheet: ETH production
	Concentration	V container	V sample	m sample	T treatment	results
Control	0.04274	15	0.49	0.4203	12	0.122959
Control	0.05721	15	0.5	0.438	12	0.157828	0.138623
Control	0.0461	15	0.45	0.4138	12	0.13508
HRW	0.09862	15	0.6	0.5081	12	0.232915
HRW	0.107	15	0.5	0.4066	12	0.317982	0.298528
HRW	0.1386	15	0.55	0.4842	12	0.344687
HRW	0.023	15	0.6	0.5136	12	0.0537383
			Control	HRW
		average	0.138623	0.298528
		standard deviation	0.0556813	0.0352159

## Sheet: Co-treatment
	CK	H2	ETH	H2+ETH	H2+AVG	H2+AgNO3
1	7.28571	8.5	8.28571	9.57143	3.5	3.16667
2	7.42857	8.4	9	8.5	5	5.33333
3	6.85714	9.25	8.55556	9.57143	2.5	3.85714
	Water (Control)	HRW	Ethephon	HRW+Ethephon	HRW+AVG	HRW+AgNO₃
average root NO.	7.19048	8.71667	8.61376	9.21429	3.66667	4.11905
standard deviation	0.297381	0.464579	0.360682	0.61859	1.25831	1.10682

## Sheet: PCR
			rbcS					SBPase					TDH					OEE1					CAPX					PDI
	1	3.70635	6.77396	0.493116			1.86607	3.75809	0.768438			1.85318	3.18215	0.479632			2.05623	2.69447	6.9644			1.8025	3.22657	0.351111			3.31728	10.0561	0.5
	1	5.09824	5.89708	0.757858			2.14355	2.18859	0.784584			1.84038	1.52626	0.615572			2.12874	1.7411	7.88986			2	2.09943	0.316439			3.94493	4.95883	0.524858
	1	3.43426	4.59479	0.460094			1.81504	2.05623	0.574349			2.01391	2.56685	0.403321			2.14355	2.36199	2.88786			1.85318	2.39496	0.25349			3.29436	7.6211	0.417544
	Control	Ethephon	HRW	HRW+AVG		Control	Ethephon	HRW	HRW+AVG		Control	Ethephon	HRW	HRW+AVG		Control	Ethephon	HRW	HRW+AVG		Control	Ethephon	HRW	HRW+AVG		Control	Ethephon	HRW	HRW+AVG
average root NO.	1	4.07962	5.75528	0.570356		1	1.94155	2.66764	0.709124		1	1.90249	2.42509	0.499508		1	2.1095	2.26585	5.91404		1	1.88523	2.57365	0.307013		1	3.51886	7.54535	0.480801
standard deviation	0	0.892583	1.09648	0.163219		0	0.176785	0.946678	0.116997		0	0.0967077	0.836997	0.107513		0	0.0467297	0.483899	2.66129		0	0.102576	0.584428	0.0494885		0	0.369168	2.54948	0.0561743
