# Supplementary material for: The role and proteomic analysis of ethylene in hydrogen gas-induced adventitious rooting development in cucumber (Cucumis sativus L.) explants
Source: PeerJ. 2020 Apr 7;8:e8896. doi: 10.7717/peerj.8896 (PMC7147439; doi:10.7717/peerj.8896)
Supplement: Supplemental Information 6 [file peerj-08-8896-s012.xlsx]

## Sheet: TopBlastHits
Sequence name	Sequence desc.	Sequence length	Hit desc.	Hit ACC	E-Value	Similarity	Bit-Score	Alignment length	Positives
KGN57792.1	glutamine synthetase	356	gi|525507210|ref|NP_001267644.1|glutamine synthetase cytosolic isozyme-like [Cucumis sativus] >gi|374676432|gb|AEZ56958.1| glutamine synthetase [Cucumis sativus]	NP_001267644	0	100	732.635	356	356
XP_011652795.1	11S globulin seed storage 2-like	479	gi|449505161|ref|XP_004162394.1|PREDICTED: 11S globulin seed storage protein 2-like [Cucumis sativus]	XP_004162394	0	99	984.171	479	477
KGN52085.1	ribulose bisphosphate carboxylase small chain 3b precursor ( isCO small subunit 3b)	185	gi|449434620|ref|XP_004135094.1|PREDICTED: ribulose bisphosphate carboxylase small chain, chloroplastic-like [Cucumis sativus] >gi|449512849|ref|XP_004164158.1| PREDICTED: ribulose bisphosphate carboxylase small chain, chloroplastic-like [Cucumis sativus]	XP_004135094	3.35135e-135	100	387.497	185	185
AAA33131.1	ribulose bisphosphate carboxylase small chloroplastic-like	189	gi|132138|sp|P08474.1|RBS_CUCSARecName: Full=Ribulose bisphosphate carboxylase small chain, chloroplastic; Short=RuBisCO small subunit; Flags: Precursor >gi|167542|gb|AAA33131.1| ribulose bisphosphate carboxylase/oxygenase precursor peptide [Cucumis sativus]	P08474	5.61739e-138	100	394.815	189	189
KGN44928.1	HSP20-like chaperones superfamily isoform 1	208	gi|449436507|ref|XP_004136034.1|PREDICTED: uncharacterized protein OsI_027940-like [Cucumis sativus] >gi|449498487|ref|XP_004160550.1| PREDICTED: uncharacterized protein OsI_027940-like [Cucumis sativus]	XP_004136034	9.98254e-144	100	410.994	208	208
KGN65655.1	ascorbate peroxidase	249	gi|525507192|ref|NP_001267635.1|L-ascorbate peroxidase, cytosolic-like [Cucumis sativus] >gi|1669585|dbj|BAA13671.1| cytosolic ascorbate peroxidase [Cucumis sativus]	NP_001267635	0	100	511.531	249	249
ACO90193.1	ascorbate peroxidase	249	gi|226897527|gb|ACO90193.1|ascorbate peroxidase [Cucumis sativus]	ACO90193	0	100	511.916	249	249
ADT80721.1	ascorbate peroxidase	249	gi|315115497|gb|ADT80721.1|ascorbate peroxidase [Cucumis sativus]	ADT80721	0	100	510.76	249	249
KGN54918.1	triosephosphate isomerase	254	gi|449453798|ref|XP_004144643.1|PREDICTED: triosephosphate isomerase, cytosolic-like isoform 2 [Cucumis sativus] >gi|449526393|ref|XP_004170198.1| PREDICTED: triosephosphate isomerase, cytosolic-like isoform 2 [Cucumis sativus]	XP_004144643	0	100	510.76	254	254
ABK55683.1	ascorbate peroxidase	154	gi|117662088|gb|ABK55683.1|cytosolic ascorbate peroxidase [Cucumis sativus]	ABK55683	1.29151e-109	100	320.087	154	154
ABO09822.1	ascorbate peroxidase	160	gi|126256521|gb|ABO09822.1|ascorbate peroxidase [Cucumis sativus]	ABO09822	2.07096e-114	100	332.798	160	160
KGN61895.1	triosephosphate chloroplastic-like	306	gi|449458564|ref|XP_004147017.1|PREDICTED: triosephosphate isomerase, chloroplastic-like [Cucumis sativus] >gi|449489711|ref|XP_004158393.1| PREDICTED: triosephosphate isomerase, chloroplastic-like [Cucumis sativus]	XP_004147017	0	100	621.698	306	306
KGN50632.1	sedoheptulose-1,7- chloroplastic-like	388	gi|525507240|ref|NP_001267658.1|sedoheptulose-1,7-bisphosphatase, chloroplastic-like [Cucumis sativus] >gi|229597543|gb|ACQ82818.1| sedoheptulose-1,7-bisphosphatase [Cucumis sativus]	NP_001267658	0	100	795.808	388	388
KGN49283.1	magnesium-chelatase subunit chloroplastic-like	420	gi|449433772|ref|XP_004134671.1|PREDICTED: magnesium-chelatase subunit ChlI, chloroplastic-like [Cucumis sativus]	XP_004134671	0	100	852.432	420	420
XP_011653612.1	PREDICTED: uncharacterized protein LOC101209774	681	gi|449448928|ref|XP_004142217.1|PREDICTED: uncharacterized protein LOC101209774 [Cucumis sativus]	XP_004142217	0	99	1385.93	682	681
XP_011653611.1	PREDICTED: uncharacterized protein LOC101209774	682	gi|449448928|ref|XP_004142217.1|PREDICTED: uncharacterized protein LOC101209774 [Cucumis sativus]	XP_004142217	0	99	1381.31	683	681
XP_011652060.1	elongation factor 1-delta-like	226	gi|449469633|ref|XP_004152523.1|PREDICTED: elongation factor 1-delta-like [Cucumis sativus] >gi|449503686|ref|XP_004162126.1| PREDICTED: elongation factor 1-delta-like [Cucumis sativus]	XP_004152523	1.51521e-159	100	452.595	226	226
XP_004138389.1	elongation factor 1-delta-like	223	gi|449441238|ref|XP_004138389.1|PREDICTED: elongation factor 1-delta-like [Cucumis sativus] >gi|449526197|ref|XP_004170100.1| PREDICTED: elongation factor 1-delta-like [Cucumis sativus]	XP_004138389	4.53211e-157	100	446.047	223	223
KGN45846.1	elongation factor 1-delta-like	416	gi|449441238|ref|XP_004138389.1|PREDICTED: elongation factor 1-delta-like [Cucumis sativus] >gi|449526197|ref|XP_004170100.1| PREDICTED: elongation factor 1-delta-like [Cucumis sativus]	XP_004138389	7.50176e-156	100	451.055	223	223
KGN48464.1	oxygen-evolving enhancer chloroplastic-like	332	gi|449448384|ref|XP_004141946.1|PREDICTED: oxygen-evolving enhancer protein 1, chloroplastic-like [Cucumis sativus] >gi|449497717|ref|XP_004160493.1| PREDICTED: oxygen-evolving enhancer protein 1, chloroplastic-like [Cucumis sativus]	XP_004141946	0	100	670.618	332	332
KGN43571.1	cytochrome b6-f complex iron-sulfur chloroplastic-like	227	gi|525507328|ref|NP_001267704.1|cytochrome b6-f complex iron-sulfur subunit, chloroplastic-like [Cucumis sativus] >gi|449530696|ref|XP_004172329.1| PREDICTED: cytochrome b6-f complex iron-sulfur subunit, chloroplastic-like [Cucumis sativus] >gi|395455815|emb|CCJ09121.1| Rieske type ion sulfur subunit (chloroplast) [Cucumis sativus]	NP_001267704	1.69455e-166	100	470.315	227	227
KGN56609.1	chloroplast transketolase	742	gi|525507124|ref|NP_001267600.1|transketolase [Cucumis sativus] >gi|449480047|ref|XP_004155784.1| PREDICTED: transketolase, chloroplastic-like [Cucumis sativus] >gi|351735634|gb|AEQ59483.1| chloroplast transketolase [Cucumis sativus]	NP_001267600	0	100	1535.39	742	742
KGN46249.1	transketolase family	745	gi|449454520|ref|XP_004145002.1|PREDICTED: transketolase, chloroplastic-like [Cucumis sativus] >gi|449474170|ref|XP_004154093.1| PREDICTED: transketolase, chloroplastic-like [Cucumis sativus]	XP_004145002	0	100	1539.63	745	745
AAZ94637.1	ATP synthase CF1 alpha subunit	507	gi|146317661|sp|Q2QDA3.1|ATPA_CUCSARecName: Full=ATP synthase subunit alpha, chloroplastic; AltName: Full=ATP synthase F1 sector subunit alpha; AltName: Full=F-ATPase subunit alpha >gi|74027087|gb|AAZ94637.1| ATPase alpha subunit [Cucumis sativus] >gi|115432789|gb|ABI97402.1| ATP synthase CF1 alpha subunit [Cucumis sativus] >gi|115498288|gb|ABI98730.1| ATP synthase CF1 alpha subunit [Cucumis sati…	Q2QDA3	0	100	1017.3	507	507
YP_247584.1	ATP synthase CF1 alpha subunit (chloroplast)	506	gi|68164788|ref|YP_247584.1|ATP synthase CF1 alpha subunit [Cucumis sativus] >gi|67511383|emb|CAJ00743.1| ATP synthase CF1 alpha chain [Cucumis sativus]	YP_247584	0	100	1018.45	506	506
CAJ00765.1	ATP synthase CF1 beta subunit (chloroplast)	498	gi|68164810|ref|YP_247606.1|ATP synthase CF1 beta subunit [Cucumis sativus] >gi|67511405|emb|CAJ00765.1| ATP synthase CF1 beta chain [Cucumis sativus] >gi|115498310|gb|ABI98752.1| ATP synthase CF1 beta subunit [Cucumis sativus]	YP_247606	0	100	1006.51	498	498
AAZ94658.1	ATP synthase CF1 beta subunit (chloroplast)	498	gi|158518590|sp|Q4VZI5.2|ATPB_CUCSARecName: Full=ATP synthase subunit beta, chloroplastic; AltName: Full=ATP synthase F1 sector subunit beta; AltName: Full=F-ATPase subunit beta >gi|74027108|gb|AAZ94658.1| ATPase beta subunit [Cucumis sativus] >gi|115432811|gb|ABI97424.1| ATP synthase CF1 beta subunit [Cucumis sativus]	Q4VZI5	0	100	1006.51	498	498
AAK72752.1	ATP synthase beta subunit	483	gi|14718022|gb|AAK72752.1|ATP synthase beta subunit [Cucumis sativus]	AAK72752	0	100	971.459	483	483
XP_011651441.1	legumin family	494	gi|449468680|ref|XP_004152049.1|PREDICTED: 11S globulin subunit beta-like [Cucumis sativus]	XP_004152049	0	100	1027.7	494	494
KGN57905.1	legumin family	501	gi|449468680|ref|XP_004152049.1|PREDICTED: 11S globulin subunit beta-like [Cucumis sativus]	XP_004152049	0	96	880.552	493	474
XP_004135596.1	26S protease regulatory subunit 6A homolog A-like	423	gi|449435627|ref|XP_004135596.1|PREDICTED: 26S protease regulatory subunit 6A homolog A-like [Cucumis sativus] >gi|449525490|ref|XP_004169750.1| PREDICTED: LOW QUALITY PROTEIN: 26S protease regulatory subunit 6A homolog A-like [Cucumis sativus]	XP_004135596	0	100	865.914	423	423
XP_011648845.1	26S protease regulatory subunit 6A homolog A-like	347	gi|449454065|ref|XP_004144776.1|PREDICTED: 26S protease regulatory subunit 6A homolog A-like [Cucumis sativus]	XP_004144776	0	100	711.449	345	345
KGN60962.1	26S protease regulatory subunit 6A homolog A-like	423	gi|449454065|ref|XP_004144776.1|PREDICTED: 26S protease regulatory subunit 6A homolog A-like [Cucumis sativus]	XP_004144776	0	100	863.988	423	423
XP_004145754.1	RUBISCO SUBUNIT BINDING- ALPHA SUBUNIT	583	gi|449456032|ref|XP_004145754.1|PREDICTED: ruBisCO large subunit-binding protein subunit alpha, chloroplastic-like [Cucumis sativus] >gi|449496181|ref|XP_004160065.1| PREDICTED: ruBisCO large subunit-binding protein subunit alpha, chloroplastic-like [Cucumis sativus]	XP_004145754	0	100	1150.19	583	583
KGN48214.1	threonine dehydratase chloroplastic-like	619	gi|449451239|ref|XP_004143369.1|PREDICTED: threonine dehydratase biosynthetic, chloroplastic-like [Cucumis sativus]	XP_004143369	0	100	1266.91	619	619
AAZ94668.1	photosystem II cytochrome b559 alpha subunit	83	gi|11497544|ref|NP_054952.1|photosystem II protein V [Spinacia oleracea] >gi|28261734|ref|NP_783249.1| photosystem II protein V [Atropa belladonna] >gi|34500931|ref|NP_904116.1| photosystem II protein V [Amborella trichopoda] >gi|164597827|ref|NP_084709.2| photosystem II protein V [Oenothera elata subsp. hookeri] >gi|68164820|ref|YP_247616.1| photosystem II protein V [Cucumis sativus] >gi|9120891…	NP_054952	6.90625e-52	100	167.933	83	83
KGN62618.1	proteasome subunit alpha type-1-A-like	281	gi|449469965|ref|XP_004152689.1|PREDICTED: proteasome subunit alpha type-1-A-like [Cucumis sativus]	XP_004152689	0	100	585.104	281	281
KGN57117.1	translationally-controlled tumor homolog	168	gi|449432858|ref|XP_004134215.1|PREDICTED: translationally-controlled tumor protein homolog [Cucumis sativus] >gi|449513346|ref|XP_004164302.1| PREDICTED: translationally-controlled tumor protein homolog [Cucumis sativus]	XP_004134215	1.29846e-115	100	336.265	168	168
KGN66170.1	NADP-dependent malic enzyme-like	591	gi|449435772|ref|XP_004135668.1|PREDICTED: NADP-dependent malic enzyme-like [Cucumis sativus]	XP_004135668	0	100	1217.99	591	591
KGN51208.1	chlorophyll a-b binding chloroplastic-like	246	gi|449452104|ref|XP_004143800.1|PREDICTED: chlorophyll a-b binding protein 6A, chloroplastic-like [Cucumis sativus] >gi|449525097|ref|XP_004169556.1| PREDICTED: chlorophyll a-b binding protein 6A, chloroplastic-like [Cucumis sativus]	XP_004143800	6.97896e-179	100	503.442	246	246
KGN56349.1	60S acidic ribosomal P1-2	113	gi|449431956|ref|XP_004133766.1|PREDICTED: 60S acidic ribosomal protein P1-2-like isoform 1 [Cucumis sativus] >gi|449431958|ref|XP_004133767.1| PREDICTED: 60S acidic ribosomal protein P1-2-like isoform 2 [Cucumis sativus] >gi|449478024|ref|XP_004155199.1| PREDICTED: 60S acidic ribosomal protein P1-2-like [Cucumis sativus]	XP_004133766	1.83123e-71	100	219.935	113	113
KGN43793.1	soluble inorganic pyrophosphatase chloroplastic-like	296	gi|449438258|ref|XP_004136906.1|PREDICTED: soluble inorganic pyrophosphatase 1, chloroplastic-like [Cucumis sativus] >gi|449527824|ref|XP_004170909.1| PREDICTED: soluble inorganic pyrophosphatase 1, chloroplastic-like [Cucumis sativus]	XP_004136906	0	100	605.905	296	296
XP_004150488.1	60S acidic ribosomal P1-2	113	gi|449431956|ref|XP_004133766.1|PREDICTED: 60S acidic ribosomal protein P1-2-like isoform 1 [Cucumis sativus] >gi|449431958|ref|XP_004133767.1| PREDICTED: 60S acidic ribosomal protein P1-2-like isoform 2 [Cucumis sativus] >gi|449478024|ref|XP_004155199.1| PREDICTED: 60S acidic ribosomal protein P1-2-like [Cucumis sativus]	XP_004133766	1.83123e-71	100	219.935	113	113
KGN62647.1	cysteine ase RD19a-like	371	gi|449469923|ref|XP_004152668.1|PREDICTED: cysteine proteinase RD19a-like [Cucumis sativus] >gi|449520697|ref|XP_004167370.1| PREDICTED: cysteine proteinase RD19a-like [Cucumis sativus]	XP_004152668	0	100	774.237	371	371
KGN57401.1	PREDICTED: uncharacterized protein LOC101224685	291	gi|449485509|ref|XP_004157192.1|PREDICTED: uncharacterized protein LOC101224685 [Cucumis sativus]	XP_004157192	0	100	578.941	291	291
KGN61513.1	Late embryogenesis abundant group 2 isoform 1	316	gi|449442405|ref|XP_004138972.1|PREDICTED: uncharacterized protein LOC101217348 [Cucumis sativus] >gi|449511205|ref|XP_004163893.1| PREDICTED: uncharacterized protein LOC101227357 [Cucumis sativus]	XP_004138972	0	100	622.468	316	316
XP_004137828.1	29 kDa chloroplastic-like	278	gi|449440111|ref|XP_004137828.1|PREDICTED: 29 kDa ribonucleoprotein, chloroplastic-like [Cucumis sativus] >gi|449483348|ref|XP_004156563.1| PREDICTED: 29 kDa ribonucleoprotein, chloroplastic-like [Cucumis sativus]	XP_004137828	0	100	557.37	278	278
KGN61439.1	stromal 70 kDa heat shock-related chloroplastic-like	707	gi|449442347|ref|XP_004138943.1|PREDICTED: stromal 70 kDa heat shock-related protein, chloroplastic-like [Cucumis sativus] >gi|449527805|ref|XP_004170900.1| PREDICTED: stromal 70 kDa heat shock-related protein, chloroplastic-like [Cucumis sativus] >gi|124245039|gb|ABM92419.1| chloroplast HSP70 [Cucumis sativus]	XP_004138943	0	100	1420.6	707	707
XP_004139746.2	stromal 70 kDa heat shock-related chloroplastic-like	677	gi|449443966|ref|XP_004139746.1|PREDICTED: stromal 70 kDa heat shock-related protein, chloroplastic-like [Cucumis sativus]	XP_004139746	0	99	1363.98	677	676
XP_004147619.1	30S ribosomal chloroplastic-like	413	gi|449459770|ref|XP_004147619.1|PREDICTED: 30S ribosomal protein S1, chloroplastic-like [Cucumis sativus] >gi|449517357|ref|XP_004165712.1| PREDICTED: 30S ribosomal protein S1, chloroplastic-like [Cucumis sativus]	XP_004147619	0	100	842.803	413	413
KGN57185.1	30S ribosomal chloroplastic-like	409	gi|449459770|ref|XP_004147619.1|PREDICTED: 30S ribosomal protein S1, chloroplastic-like [Cucumis sativus] >gi|449517357|ref|XP_004165712.1| PREDICTED: 30S ribosomal protein S1, chloroplastic-like [Cucumis sativus]	XP_004147619	0	96	773.852	413	398
CCF55356.1	ribulose bisphosphate carboxylase small chloroplastic-like	185	gi|379131260|emb|CCF55356.1|ribulose-1,5-bisphosphate carboxylase small subunit [Cucumis sativus]	CCF55356	3.65778e-135	100	387.497	185	185
XP_004136830.1	14-3-3 D-like	261	gi|449438105|ref|XP_004136830.1|PREDICTED: 14-3-3-like protein D-like [Cucumis sativus] >gi|449478984|ref|XP_004155472.1| PREDICTED: 14-3-3-like protein D-like [Cucumis sativus]	XP_004136830	0	100	538.495	261	261
KGN59544.1	latex abundant 1	323	gi|449437830|ref|XP_004136693.1|PREDICTED: uncharacterized protein At5g39570-like [Cucumis sativus]	XP_004136693	0	100	583.948	323	323
KGN60531.1	nucleosome assembly 1-like 1-like	375	gi|449446598|ref|XP_004141058.1|PREDICTED: nucleosome assembly protein 1-like 1-like [Cucumis sativus] >gi|449488040|ref|XP_004157924.1| PREDICTED: nucleosome assembly protein 1-like 1-like [Cucumis sativus]	XP_004141058	0	100	761.525	375	375
KGN60068.1	Plastocyanin chloroplast	166	gi|449437172|ref|XP_004136366.1|PREDICTED: plastocyanin, chloroplastic-like [Cucumis sativus]	XP_004136366	1.68197e-114	100	333.569	166	166
prf||0911298A	Plastocyanin chloroplast	99	gi|130266|sp|P00293.1|PLAS_CUCSARecName: Full=Plastocyanin >gi|223787|prf||0911298A plastocyanin	P00293	5.99237e-64	100	199.904	99	99
KGN45737.1	ribulose bisphosphate carboxylase oxygenase activase chloroplastic-like	474	gi|449441384|ref|XP_004138462.1|PREDICTED: ribulose bisphosphate carboxylase/oxygenase activase 1, chloroplastic-like [Cucumis sativus]	XP_004138462	0	100	978.393	474	474
KGN50568.1	ribulose bisphosphate carboxylase oxygenase activase chloroplastic-like	443	gi|449459892|ref|XP_004147680.1|PREDICTED: ribulose bisphosphate carboxylase/oxygenase activase 1, chloroplastic-like [Cucumis sativus]	XP_004147680	0	100	914.45	443	443
CAA47906.1	Ribulose bisphosphate carboxylase oxygenase activase chloroplast	413	gi|525507234|ref|NP_001267655.1|ribulose bisphosphate carboxylase/oxygenase activase, chloroplastic-like [Cucumis sativus] >gi|239837354|gb|ACS29559.1| chloroplast rubisco activase [Cucumis sativus]	NP_001267655	0	100	863.988	409	409
XP_011656301.1	Ribulose bisphosphate carboxylase oxygenase activase chloroplast	593	gi|525507234|ref|NP_001267655.1|ribulose bisphosphate carboxylase/oxygenase activase, chloroplastic-like [Cucumis sativus] >gi|239837354|gb|ACS29559.1| chloroplast rubisco activase [Cucumis sativus]	NP_001267655	0	97	1208.74	611	593
XP_011656299.1	Ribulose bisphosphate carboxylase oxygenase activase chloroplast	608	gi|525507234|ref|NP_001267655.1|ribulose bisphosphate carboxylase/oxygenase activase, chloroplastic-like [Cucumis sativus] >gi|239837354|gb|ACS29559.1| chloroplast rubisco activase [Cucumis sativus]	NP_001267655	0	99	1243.8	611	608
XP_011656297.1	Ribulose bisphosphate carboxylase oxygenase activase chloroplast	610	gi|525507234|ref|NP_001267655.1|ribulose bisphosphate carboxylase/oxygenase activase, chloroplastic-like [Cucumis sativus] >gi|239837354|gb|ACS29559.1| chloroplast rubisco activase [Cucumis sativus]	NP_001267655	0	99	1252.27	611	610
ABK55669.1	chloroplast ribulose bisphosphate carboxylase oxygenase activase partial	150	gi|117661805|gb|ABK55669.1|chloroplast rubisco activase [Cucumis sativus]	ABK55669	1.10525e-106	100	312.383	150	150
ABO36654.1	ribulose bisphosphate carboxylase oxygenase chloroplastic-like	111	gi|133711850|gb|ABO36654.1|RuBisCO activase [Cucumis sativus]	ABO36654	3.22758e-74	100	226.868	111	111
XP_004144316.2	nascent polypeptide-associated complex subunit alpha -like	200	gi|449529584|ref|XP_004171778.1|PREDICTED: nascent polypeptide-associated complex subunit alpha-like protein-like [Cucumis sativus]	XP_004171778	7.29894e-138	100	395.586	200	200
XP_004144317.1	nascent polypeptide-associated complex subunit alpha -like	200	gi|449453141|ref|XP_004144317.1|PREDICTED: nascent polypeptide-associated complex subunit alpha-like protein-like [Cucumis sativus] >gi|449529586|ref|XP_004171779.1| PREDICTED: nascent polypeptide-associated complex subunit alpha-like protein-like [Cucumis sativus]	XP_004144317	2.78844e-138	100	396.741	200	200
KGN54670.1	nascent polypeptide-associated complex subunit alpha -like	196	gi|449453141|ref|XP_004144317.1|PREDICTED: nascent polypeptide-associated complex subunit alpha-like protein-like [Cucumis sativus] >gi|449529586|ref|XP_004171779.1| PREDICTED: nascent polypeptide-associated complex subunit alpha-like protein-like [Cucumis sativus]	XP_004144317	4.34387e-106	97	314.694	160	156
KGN65908.1	tubulin beta-1 chain-like	443	gi|449435522|ref|XP_004135544.1|PREDICTED: tubulin beta-1 chain-like [Cucumis sativus]	XP_004135544	0	100	934.865	443	443
KGN62682.1	tubulin beta-1 chain-like	449	gi|449469885|ref|XP_004152649.1|PREDICTED: tubulin beta-1 chain-like [Cucumis sativus]	XP_004152649	0	100	947.192	449	449
KGN64172.1	tubulin beta-1 chain-like	445	gi|449439455|ref|XP_004137501.1|PREDICTED: tubulin beta-1 chain-like [Cucumis sativus]	XP_004137501	0	100	938.332	445	445
KGN58809.1	tubulin beta-1 chain-like	446	gi|449439940|ref|XP_004137743.1|PREDICTED: tubulin beta-1 chain-like [Cucumis sativus] >gi|449522799|ref|XP_004168413.1| PREDICTED: tubulin beta-1 chain-like [Cucumis sativus]	XP_004137743	0	100	940.258	446	446
KGN54346.1	tubulin beta-1 chain-like	446	gi|449460321|ref|XP_004147894.1|PREDICTED: tubulin beta-1 chain-like [Cucumis sativus]	XP_004147894	0	100	941.414	446	446
KGN59749.1	tubulin alpha-1 chain	449	gi|449446750|ref|XP_004141134.1|PREDICTED: tubulin alpha-3 chain-like [Cucumis sativus]	XP_004141134	0	100	935.25	449	449
KGN54025.1	tubulin alpha-1 chain	449	gi|449463853|ref|XP_004149645.1|PREDICTED: tubulin alpha-3 chain-like [Cucumis sativus] >gi|449515790|ref|XP_004164931.1| PREDICTED: tubulin alpha-3 chain-like [Cucumis sativus]	XP_004149645	0	100	937.947	449	449
KGN58559.1	disease resistance RGA2-like	1089	gi|449518635|ref|XP_004166342.1|PREDICTED: disease resistance protein RGA2-like [Cucumis sativus]	XP_004166342	0	99	2216.42	1089	1083
ABN41481.1	ribulose bisphosphate carboxylase small chloroplastic-like	93	gi|132138|sp|P08474.1|RBS_CUCSARecName: Full=Ribulose bisphosphate carboxylase small chain, chloroplastic; Short=RuBisCO small subunit; Flags: Precursor >gi|167542|gb|AAA33131.1| ribulose bisphosphate carboxylase/oxygenase precursor peptide [Cucumis sativus]	P08474	3.76883e-63	100	200.675	93	93
XP_011656300.1	Ribulose bisphosphate carboxylase oxygenase activase chloroplast	594	gi|525507234|ref|NP_001267655.1|ribulose bisphosphate carboxylase/oxygenase activase, chloroplastic-like [Cucumis sativus] >gi|239837354|gb|ACS29559.1| chloroplast rubisco activase [Cucumis sativus]	NP_001267655	0	97	1216.06	611	594
ACS29559.1	Ribulose bisphosphate carboxylase oxygenase activase chloroplast	611	gi|525507234|ref|NP_001267655.1|ribulose bisphosphate carboxylase/oxygenase activase, chloroplastic-like [Cucumis sativus] >gi|239837354|gb|ACS29559.1| chloroplast rubisco activase [Cucumis sativus]	NP_001267655	0	100	1259.2	611	611
KGN47715.1	PDI-like 1-1 isoform 2	510	gi|449464162|ref|XP_004149798.1|PREDICTED: protein disulfide-isomerase-like [Cucumis sativus] >gi|449513339|ref|XP_004164300.1| PREDICTED: protein disulfide-isomerase-like [Cucumis sativus]	XP_004149798	0	100	1033.09	510	510

## Sheet: protein2go
SeqName	Hit_Desc	GO_Group	GO_ID	Term
KGN57792.1	glutamine synthetase	F	GO:0000166	nucleotide binding
KGN57792.1	glutamine synthetase	C	GO:0005737	cytoplasm
KGN57792.1	glutamine synthetase	F	GO:0003824	catalytic activity
KGN57792.1	glutamine synthetase	P	GO:0009058	biosynthetic process
KGN57792.1	glutamine synthetase	P	GO:0009987	cellular process
KGN57908.1	11S globulin seed storage 2-like	F	GO:0003674	molecular_function
KGN52085.1	ribulose bisphosphate carboxylase small chain 3b precursor ( isCO small subunit 3b)	P	GO:0009058	biosynthetic process
KGN52085.1	ribulose bisphosphate carboxylase small chain 3b precursor ( isCO small subunit 3b)	C	GO:0005840	ribosome
KGN52085.1	ribulose bisphosphate carboxylase small chain 3b precursor ( isCO small subunit 3b)	C	GO:0005576	extracellular region
KGN52085.1	ribulose bisphosphate carboxylase small chain 3b precursor ( isCO small subunit 3b)	C	GO:0009536	plastid
KGN52085.1	ribulose bisphosphate carboxylase small chain 3b precursor ( isCO small subunit 3b)	C	GO:0009579	thylakoid
KGN52085.1	ribulose bisphosphate carboxylase small chain 3b precursor ( isCO small subunit 3b)	P	GO:0005975	carbohydrate metabolic process
KGN52085.1	ribulose bisphosphate carboxylase small chain 3b precursor ( isCO small subunit 3b)	P	GO:0009628	response to abiotic stimulus
KGN52085.1	ribulose bisphosphate carboxylase small chain 3b precursor ( isCO small subunit 3b)	F	GO:0003824	catalytic activity
KGN52085.1	ribulose bisphosphate carboxylase small chain 3b precursor ( isCO small subunit 3b)	C	GO:0005618	cell wall
KGN52085.1	ribulose bisphosphate carboxylase small chain 3b precursor ( isCO small subunit 3b)	C	GO:0016020	membrane
KGN52085.1	ribulose bisphosphate carboxylase small chain 3b precursor ( isCO small subunit 3b)	C	GO:0005829	cytosol
KGN52085.1	ribulose bisphosphate carboxylase small chain 3b precursor ( isCO small subunit 3b)	P	GO:0015979	photosynthesis
AAA33131.1	ribulose bisphosphate carboxylase small chloroplastic-like	P	GO:0005975	carbohydrate metabolic process
AAA33131.1	ribulose bisphosphate carboxylase small chloroplastic-like	F	GO:0003824	catalytic activity
AAA33131.1	ribulose bisphosphate carboxylase small chloroplastic-like	P	GO:0015979	photosynthesis
AAA33131.1	ribulose bisphosphate carboxylase small chloroplastic-like	P	GO:0009058	biosynthetic process
AAA33131.1	ribulose bisphosphate carboxylase small chloroplastic-like	C	GO:0009536	plastid
KGN44928.1	HSP20-like chaperones superfamily isoform 1	C	GO:0005829	cytosol
KGN44928.1	HSP20-like chaperones superfamily isoform 1	C	GO:0005886	plasma membrane
KGN65655.1	ascorbate peroxidase	P	GO:0005975	carbohydrate metabolic process
KGN65655.1	ascorbate peroxidase	F	GO:0003824	catalytic activity
KGN65655.1	ascorbate peroxidase	F	GO:0005488	binding
KGN65655.1	ascorbate peroxidase	P	GO:0006950	response to stress
KGN65655.1	ascorbate peroxidase	P	GO:0009987	cellular process
ACO90193.1	ascorbate peroxidase	P	GO:0005975	carbohydrate metabolic process
ACO90193.1	ascorbate peroxidase	F	GO:0003824	catalytic activity
ACO90193.1	ascorbate peroxidase	F	GO:0005488	binding
ACO90193.1	ascorbate peroxidase	P	GO:0006950	response to stress
ACO90193.1	ascorbate peroxidase	P	GO:0009987	cellular process
ADT80721.1	ascorbate peroxidase	P	GO:0005975	carbohydrate metabolic process
ADT80721.1	ascorbate peroxidase	F	GO:0003824	catalytic activity
ADT80721.1	ascorbate peroxidase	F	GO:0005488	binding
ADT80721.1	ascorbate peroxidase	P	GO:0006950	response to stress
ADT80721.1	ascorbate peroxidase	P	GO:0009987	cellular process
KGN54918.1	triosephosphate isomerase	P	GO:0006091	generation of precursor metabolites and energy
KGN54918.1	triosephosphate isomerase	P	GO:0009056	catabolic process
KGN54918.1	triosephosphate isomerase	P	GO:0009058	biosynthetic process
KGN54918.1	triosephosphate isomerase	C	GO:0005773	vacuole
KGN54918.1	triosephosphate isomerase	P	GO:0006139	nucleobase-containing compound metabolic process
KGN54918.1	triosephosphate isomerase	C	GO:0009536	plastid
KGN54918.1	triosephosphate isomerase	P	GO:0005975	carbohydrate metabolic process
KGN54918.1	triosephosphate isomerase	C	GO:0016020	membrane
KGN54918.1	triosephosphate isomerase	P	GO:0006629	lipid metabolic process
KGN54918.1	triosephosphate isomerase	C	GO:0005829	cytosol
KGN54918.1	triosephosphate isomerase	F	GO:0016740	transferase activity
ABK55683.1	ascorbate peroxidase	P	GO:0005975	carbohydrate metabolic process
ABK55683.1	ascorbate peroxidase	F	GO:0003824	catalytic activity
ABK55683.1	ascorbate peroxidase	F	GO:0005488	binding
ABK55683.1	ascorbate peroxidase	P	GO:0006950	response to stress
ABK55683.1	ascorbate peroxidase	P	GO:0009987	cellular process
ABO09822.1	ascorbate peroxidase	P	GO:0005975	carbohydrate metabolic process
ABO09822.1	ascorbate peroxidase	F	GO:0003824	catalytic activity
ABO09822.1	ascorbate peroxidase	F	GO:0005488	binding
ABO09822.1	ascorbate peroxidase	P	GO:0006950	response to stress
ABO09822.1	ascorbate peroxidase	P	GO:0009987	cellular process
KGN61895.1	triosephosphate chloroplastic-like	P	GO:0005975	carbohydrate metabolic process
KGN61895.1	triosephosphate chloroplastic-like	P	GO:0006091	generation of precursor metabolites and energy
KGN61895.1	triosephosphate chloroplastic-like	F	GO:0003824	catalytic activity
KGN61895.1	triosephosphate chloroplastic-like	P	GO:0009056	catabolic process
KGN61895.1	triosephosphate chloroplastic-like	P	GO:0006629	lipid metabolic process
KGN61895.1	triosephosphate chloroplastic-like	C	GO:0005829	cytosol
KGN61895.1	triosephosphate chloroplastic-like	P	GO:0009058	biosynthetic process
KGN61895.1	triosephosphate chloroplastic-like	P	GO:0006139	nucleobase-containing compound metabolic process
KGN50632.1	sedoheptulose-1,7- chloroplastic-like	P	GO:0005975	carbohydrate metabolic process
KGN50632.1	sedoheptulose-1,7- chloroplastic-like	P	GO:0006091	generation of precursor metabolites and energy
KGN50632.1	sedoheptulose-1,7- chloroplastic-like	P	GO:0009056	catabolic process
KGN50632.1	sedoheptulose-1,7- chloroplastic-like	P	GO:0009058	biosynthetic process
KGN50632.1	sedoheptulose-1,7- chloroplastic-like	P	GO:0006139	nucleobase-containing compound metabolic process
KGN50632.1	sedoheptulose-1,7- chloroplastic-like	F	GO:0016787	hydrolase activity
KGN49283.1	magnesium-chelatase subunit chloroplastic-like	F	GO:0000166	nucleotide binding
KGN49283.1	magnesium-chelatase subunit chloroplastic-like	F	GO:0003824	catalytic activity
KGN49283.1	magnesium-chelatase subunit chloroplastic-like	P	GO:0015979	photosynthesis
KGN49283.1	magnesium-chelatase subunit chloroplastic-like	P	GO:0009058	biosynthetic process
KGN49283.1	magnesium-chelatase subunit chloroplastic-like	C	GO:0009536	plastid
XP_011652060.1	elongation factor 1-delta-like	F	GO:0008135	translation factor activity, nucleic acid binding
XP_011652060.1	elongation factor 1-delta-like	C	GO:0005840	ribosome
XP_004138389.1	elongation factor 1-delta-like	C	GO:0005829	cytosol
XP_004138389.1	elongation factor 1-delta-like	F	GO:0008135	translation factor activity, nucleic acid binding
XP_004138389.1	elongation factor 1-delta-like	C	GO:0005840	ribosome
XP_004138389.1	elongation factor 1-delta-like	C	GO:0005886	plasma membrane
KGN45846.1	elongation factor 1-delta-like	F	GO:0008135	translation factor activity, nucleic acid binding
KGN45846.1	elongation factor 1-delta-like	C	GO:0005840	ribosome
KGN48464.1	oxygen-evolving enhancer chloroplastic-like	P	GO:0006091	generation of precursor metabolites and energy
KGN48464.1	oxygen-evolving enhancer chloroplastic-like	C	GO:0016020	membrane
KGN48464.1	oxygen-evolving enhancer chloroplastic-like	P	GO:0015979	photosynthesis
KGN48464.1	oxygen-evolving enhancer chloroplastic-like	F	GO:0005488	binding
KGN48464.1	oxygen-evolving enhancer chloroplastic-like	C	GO:0009536	plastid
KGN48464.1	oxygen-evolving enhancer chloroplastic-like	C	GO:0009579	thylakoid
KGN43571.1	cytochrome b6-f complex iron-sulfur chloroplastic-like	F	GO:0003824	catalytic activity
KGN43571.1	cytochrome b6-f complex iron-sulfur chloroplastic-like	C	GO:0016020	membrane
KGN43571.1	cytochrome b6-f complex iron-sulfur chloroplastic-like	P	GO:0015979	photosynthesis
KGN43571.1	cytochrome b6-f complex iron-sulfur chloroplastic-like	F	GO:0005488	binding
KGN43571.1	cytochrome b6-f complex iron-sulfur chloroplastic-like	C	GO:0009536	plastid
KGN43571.1	cytochrome b6-f complex iron-sulfur chloroplastic-like	C	GO:0009579	thylakoid
KGN56609.1	chloroplast transketolase	F	GO:0016740	transferase activity
KGN56609.1	chloroplast transketolase	P	GO:0006139	nucleobase-containing compound metabolic process
KGN46249.1	transketolase family	F	GO:0016740	transferase activity
KGN46249.1	transketolase family	P	GO:0006139	nucleobase-containing compound metabolic process
AAZ94637.1	ATP synthase CF1 alpha subunit	F	GO:0000166	nucleotide binding
AAZ94637.1	ATP synthase CF1 alpha subunit	P	GO:0006091	generation of precursor metabolites and energy
AAZ94637.1	ATP synthase CF1 alpha subunit	P	GO:0009058	biosynthetic process
AAZ94637.1	ATP synthase CF1 alpha subunit	P	GO:0006139	nucleobase-containing compound metabolic process
AAZ94637.1	ATP synthase CF1 alpha subunit	C	GO:0005886	plasma membrane
AAZ94637.1	ATP synthase CF1 alpha subunit	C	GO:0009536	plastid
AAZ94637.1	ATP synthase CF1 alpha subunit	F	GO:0005215	transporter activity
AAZ94637.1	ATP synthase CF1 alpha subunit	C	GO:0009579	thylakoid
AAZ94637.1	ATP synthase CF1 alpha subunit	F	GO:0016787	hydrolase activity
YP_247584.1	ATP synthase CF1 alpha subunit (chloroplast)	F	GO:0000166	nucleotide binding
YP_247584.1	ATP synthase CF1 alpha subunit (chloroplast)	P	GO:0006091	generation of precursor metabolites and energy
YP_247584.1	ATP synthase CF1 alpha subunit (chloroplast)	C	GO:0016020	membrane
YP_247584.1	ATP synthase CF1 alpha subunit (chloroplast)	P	GO:0009058	biosynthetic process
YP_247584.1	ATP synthase CF1 alpha subunit (chloroplast)	P	GO:0006139	nucleobase-containing compound metabolic process
YP_247584.1	ATP synthase CF1 alpha subunit (chloroplast)	C	GO:0009536	plastid
YP_247584.1	ATP synthase CF1 alpha subunit (chloroplast)	F	GO:0005215	transporter activity
YP_247584.1	ATP synthase CF1 alpha subunit (chloroplast)	C	GO:0009579	thylakoid
YP_247584.1	ATP synthase CF1 alpha subunit (chloroplast)	F	GO:0016787	hydrolase activity
CAJ00765.1	ATP synthase CF1 beta subunit (chloroplast)	F	GO:0000166	nucleotide binding
CAJ00765.1	ATP synthase CF1 beta subunit (chloroplast)	P	GO:0009058	biosynthetic process
CAJ00765.1	ATP synthase CF1 beta subunit (chloroplast)	P	GO:0006139	nucleobase-containing compound metabolic process
CAJ00765.1	ATP synthase CF1 beta subunit (chloroplast)	C	GO:0005886	plasma membrane
CAJ00765.1	ATP synthase CF1 beta subunit (chloroplast)	C	GO:0009536	plastid
CAJ00765.1	ATP synthase CF1 beta subunit (chloroplast)	F	GO:0005215	transporter activity
CAJ00765.1	ATP synthase CF1 beta subunit (chloroplast)	C	GO:0009579	thylakoid
CAJ00765.1	ATP synthase CF1 beta subunit (chloroplast)	F	GO:0016787	hydrolase activity
AAZ94658.1	ATP synthase CF1 beta subunit (chloroplast)	F	GO:0000166	nucleotide binding
AAZ94658.1	ATP synthase CF1 beta subunit (chloroplast)	P	GO:0009058	biosynthetic process
AAZ94658.1	ATP synthase CF1 beta subunit (chloroplast)	P	GO:0006139	nucleobase-containing compound metabolic process
AAZ94658.1	ATP synthase CF1 beta subunit (chloroplast)	C	GO:0005886	plasma membrane
AAZ94658.1	ATP synthase CF1 beta subunit (chloroplast)	C	GO:0009536	plastid
AAZ94658.1	ATP synthase CF1 beta subunit (chloroplast)	F	GO:0005215	transporter activity
AAZ94658.1	ATP synthase CF1 beta subunit (chloroplast)	C	GO:0009579	thylakoid
AAZ94658.1	ATP synthase CF1 beta subunit (chloroplast)	F	GO:0016787	hydrolase activity
AAK72752.1	ATP synthase beta subunit	F	GO:0000166	nucleotide binding
AAK72752.1	ATP synthase beta subunit	C	GO:0016020	membrane
AAK72752.1	ATP synthase beta subunit	P	GO:0009058	biosynthetic process
AAK72752.1	ATP synthase beta subunit	P	GO:0006139	nucleobase-containing compound metabolic process
AAK72752.1	ATP synthase beta subunit	C	GO:0009536	plastid
AAK72752.1	ATP synthase beta subunit	F	GO:0005215	transporter activity
AAK72752.1	ATP synthase beta subunit	C	GO:0009579	thylakoid
AAK72752.1	ATP synthase beta subunit	F	GO:0016787	hydrolase activity
KGN57907.1	legumin family	F	GO:0003674	molecular_function
KGN57905.1	legumin family	F	GO:0003674	molecular_function
KGN66053.1	26S protease regulatory subunit 6A homolog A-like	P	GO:0019538	protein metabolic process
KGN66053.1	26S protease regulatory subunit 6A homolog A-like	P	GO:0007275	multicellular organismal development
KGN66053.1	26S protease regulatory subunit 6A homolog A-like	P	GO:0009056	catabolic process
KGN66053.1	26S protease regulatory subunit 6A homolog A-like	P	GO:0009058	biosynthetic process
KGN66053.1	26S protease regulatory subunit 6A homolog A-like	P	GO:0006139	nucleobase-containing compound metabolic process
KGN66053.1	26S protease regulatory subunit 6A homolog A-like	P	GO:0006950	response to stress
KGN66053.1	26S protease regulatory subunit 6A homolog A-like	F	GO:0000166	nucleotide binding
KGN66053.1	26S protease regulatory subunit 6A homolog A-like	C	GO:0005634	nucleus
KGN66053.1	26S protease regulatory subunit 6A homolog A-like	F	GO:0005515	protein binding
KGN66053.1	26S protease regulatory subunit 6A homolog A-like	P	GO:0016043	cellular component organization
KGN66053.1	26S protease regulatory subunit 6A homolog A-like	C	GO:0005829	cytosol
KGN66053.1	26S protease regulatory subunit 6A homolog A-like	F	GO:0016787	hydrolase activity
XP_011648845.1	26S protease regulatory subunit 6A homolog A-like	F	GO:0000166	nucleotide binding
XP_011648845.1	26S protease regulatory subunit 6A homolog A-like	C	GO:0005634	nucleus
XP_011648845.1	26S protease regulatory subunit 6A homolog A-like	P	GO:0019538	protein metabolic process
XP_011648845.1	26S protease regulatory subunit 6A homolog A-like	P	GO:0007275	multicellular organismal development
XP_011648845.1	26S protease regulatory subunit 6A homolog A-like	P	GO:0009056	catabolic process
XP_011648845.1	26S protease regulatory subunit 6A homolog A-like	C	GO:0005829	cytosol
XP_011648845.1	26S protease regulatory subunit 6A homolog A-like	P	GO:0009987	cellular process
XP_011648845.1	26S protease regulatory subunit 6A homolog A-like	F	GO:0016787	hydrolase activity
KGN60962.1	26S protease regulatory subunit 6A homolog A-like	F	GO:0000166	nucleotide binding
KGN60962.1	26S protease regulatory subunit 6A homolog A-like	C	GO:0005634	nucleus
KGN60962.1	26S protease regulatory subunit 6A homolog A-like	P	GO:0019538	protein metabolic process
KGN60962.1	26S protease regulatory subunit 6A homolog A-like	P	GO:0007275	multicellular organismal development
KGN60962.1	26S protease regulatory subunit 6A homolog A-like	P	GO:0009056	catabolic process
KGN60962.1	26S protease regulatory subunit 6A homolog A-like	C	GO:0005829	cytosol
KGN60962.1	26S protease regulatory subunit 6A homolog A-like	P	GO:0009987	cellular process
KGN60962.1	26S protease regulatory subunit 6A homolog A-like	F	GO:0016787	hydrolase activity
KGN46860.1	RUBISCO SUBUNIT BINDING- ALPHA SUBUNIT	P	GO:0009790	embryo development
KGN46860.1	RUBISCO SUBUNIT BINDING- ALPHA SUBUNIT	P	GO:0009791	post-embryonic development
KGN46860.1	RUBISCO SUBUNIT BINDING- ALPHA SUBUNIT	C	GO:0005840	ribosome
KGN46860.1	RUBISCO SUBUNIT BINDING- ALPHA SUBUNIT	C	GO:0005576	extracellular region
KGN46860.1	RUBISCO SUBUNIT BINDING- ALPHA SUBUNIT	C	GO:0009536	plastid
KGN46860.1	RUBISCO SUBUNIT BINDING- ALPHA SUBUNIT	P	GO:0000003	reproduction
KGN46860.1	RUBISCO SUBUNIT BINDING- ALPHA SUBUNIT	C	GO:0009579	thylakoid
KGN46860.1	RUBISCO SUBUNIT BINDING- ALPHA SUBUNIT	F	GO:0000166	nucleotide binding
KGN46860.1	RUBISCO SUBUNIT BINDING- ALPHA SUBUNIT	C	GO:0005739	mitochondrion
KGN46860.1	RUBISCO SUBUNIT BINDING- ALPHA SUBUNIT	C	GO:0016020	membrane
KGN46860.1	RUBISCO SUBUNIT BINDING- ALPHA SUBUNIT	P	GO:0016043	cellular component organization
KGN46860.1	RUBISCO SUBUNIT BINDING- ALPHA SUBUNIT	C	GO:0005829	cytosol
KGN48214.1	threonine dehydratase chloroplastic-like	F	GO:0003824	catalytic activity
KGN48214.1	threonine dehydratase chloroplastic-like	P	GO:0009058	biosynthetic process
KGN48214.1	threonine dehydratase chloroplastic-like	F	GO:0005488	binding
KGN48214.1	threonine dehydratase chloroplastic-like	P	GO:0009987	cellular process
AAZ94668.1	photosystem II cytochrome b559 alpha subunit	P	GO:0006091	generation of precursor metabolites and energy
AAZ94668.1	photosystem II cytochrome b559 alpha subunit	C	GO:0016020	membrane
AAZ94668.1	photosystem II cytochrome b559 alpha subunit	P	GO:0015979	photosynthesis
AAZ94668.1	photosystem II cytochrome b559 alpha subunit	F	GO:0005488	binding
AAZ94668.1	photosystem II cytochrome b559 alpha subunit	C	GO:0009536	plastid
AAZ94668.1	photosystem II cytochrome b559 alpha subunit	C	GO:0009579	thylakoid
KGN62618.1	proteasome subunit alpha type-1-A-like	C	GO:0005634	nucleus
KGN62618.1	proteasome subunit alpha type-1-A-like	P	GO:0019538	protein metabolic process
KGN62618.1	proteasome subunit alpha type-1-A-like	C	GO:0005737	cytoplasm
KGN62618.1	proteasome subunit alpha type-1-A-like	P	GO:0009056	catabolic process
KGN62618.1	proteasome subunit alpha type-1-A-like	P	GO:0009987	cellular process
KGN62618.1	proteasome subunit alpha type-1-A-like	F	GO:0016787	hydrolase activity
KGN57117.1	translationally-controlled tumor homolog	C	GO:0005737	cytoplasm
KGN66170.1	NADP-dependent malic enzyme-like	F	GO:0000166	nucleotide binding
KGN66170.1	NADP-dependent malic enzyme-like	P	GO:0006091	generation of precursor metabolites and energy
KGN66170.1	NADP-dependent malic enzyme-like	C	GO:0005737	cytoplasm
KGN66170.1	NADP-dependent malic enzyme-like	F	GO:0003824	catalytic activity
KGN51208.1	chlorophyll a-b binding chloroplastic-like	P	GO:0009628	response to abiotic stimulus
KGN51208.1	chlorophyll a-b binding chloroplastic-like	P	GO:0006091	generation of precursor metabolites and energy
KGN51208.1	chlorophyll a-b binding chloroplastic-like	C	GO:0016020	membrane
KGN51208.1	chlorophyll a-b binding chloroplastic-like	P	GO:0006464	cellular protein modification process
KGN51208.1	chlorophyll a-b binding chloroplastic-like	P	GO:0015979	photosynthesis
KGN51208.1	chlorophyll a-b binding chloroplastic-like	F	GO:0005488	binding
KGN51208.1	chlorophyll a-b binding chloroplastic-like	C	GO:0009536	plastid
KGN51208.1	chlorophyll a-b binding chloroplastic-like	C	GO:0009579	thylakoid
KGN56349.1	60S acidic ribosomal P1-2	C	GO:0005634	nucleus
KGN56349.1	60S acidic ribosomal P1-2	F	GO:0005198	structural molecule activity
KGN56349.1	60S acidic ribosomal P1-2	P	GO:0006464	cellular protein modification process
KGN56349.1	60S acidic ribosomal P1-2	C	GO:0005829	cytosol
KGN56349.1	60S acidic ribosomal P1-2	C	GO:0005840	ribosome
KGN56349.1	60S acidic ribosomal P1-2	P	GO:0006412	translation
KGN43793.1	soluble inorganic pyrophosphatase chloroplastic-like	P	GO:0006091	generation of precursor metabolites and energy
KGN43793.1	soluble inorganic pyrophosphatase chloroplastic-like	C	GO:0005737	cytoplasm
KGN43793.1	soluble inorganic pyrophosphatase chloroplastic-like	F	GO:0005488	binding
KGN43793.1	soluble inorganic pyrophosphatase chloroplastic-like	P	GO:0006139	nucleobase-containing compound metabolic process
KGN43793.1	soluble inorganic pyrophosphatase chloroplastic-like	F	GO:0016787	hydrolase activity
KGN62647.1	cysteine ase RD19a-like	P	GO:0019538	protein metabolic process
KGN62647.1	cysteine ase RD19a-like	C	GO:0005615	extracellular space
KGN62647.1	cysteine ase RD19a-like	P	GO:0009056	catabolic process
KGN62647.1	cysteine ase RD19a-like	P	GO:0009987	cellular process
KGN62647.1	cysteine ase RD19a-like	C	GO:0005764	lysosome
KGN62647.1	cysteine ase RD19a-like	F	GO:0016787	hydrolase activity
KGN57401.1	PREDICTED: uncharacterized protein LOC101224685	F	GO:0005515	protein binding
KGN61513.1	Late embryogenesis abundant group 2 isoform 1	P	GO:0009628	response to abiotic stimulus
KGN61513.1	Late embryogenesis abundant group 2 isoform 1	C	GO:0005737	cytoplasm
KGN61513.1	Late embryogenesis abundant group 2 isoform 1	C	GO:0016020	membrane
KGN61513.1	Late embryogenesis abundant group 2 isoform 1	P	GO:0006950	response to stress
KGN58963.1	29 kDa chloroplastic-like	F	GO:0000166	nucleotide binding
KGN58963.1	29 kDa chloroplastic-like	F	GO:0003676	nucleic acid binding
KGN61439.1	stromal 70 kDa heat shock-related chloroplastic-like	F	GO:0000166	nucleotide binding
KGN61439.1	stromal 70 kDa heat shock-related chloroplastic-like	F	GO:0005515	protein binding
KGN61439.1	stromal 70 kDa heat shock-related chloroplastic-like	P	GO:0009987	cellular process
XP_004139746.2	stromal 70 kDa heat shock-related chloroplastic-like	F	GO:0000166	nucleotide binding
XP_004139746.2	stromal 70 kDa heat shock-related chloroplastic-like	F	GO:0005515	protein binding
XP_004139746.2	stromal 70 kDa heat shock-related chloroplastic-like	F	GO:0003824	catalytic activity
XP_004139746.2	stromal 70 kDa heat shock-related chloroplastic-like	P	GO:0009987	cellular process
XP_004147619.1	30S ribosomal chloroplastic-like	F	GO:0003676	nucleic acid binding
XP_004147619.1	30S ribosomal chloroplastic-like	C	GO:0009536	plastid
KGN57185.1	30S ribosomal chloroplastic-like	F	GO:0003676	nucleic acid binding
KGN57185.1	30S ribosomal chloroplastic-like	C	GO:0009536	plastid
CCF55356.1	ribulose bisphosphate carboxylase small chloroplastic-like	P	GO:0005975	carbohydrate metabolic process
CCF55356.1	ribulose bisphosphate carboxylase small chloroplastic-like	F	GO:0003824	catalytic activity
CCF55356.1	ribulose bisphosphate carboxylase small chloroplastic-like	P	GO:0015979	photosynthesis
CCF55356.1	ribulose bisphosphate carboxylase small chloroplastic-like	P	GO:0009058	biosynthetic process
CCF55356.1	ribulose bisphosphate carboxylase small chloroplastic-like	C	GO:0009536	plastid
KGN43625.1	14-3-3 D-like	F	GO:0005515	protein binding
KGN60531.1	nucleosome assembly 1-like 1-like	C	GO:0005634	nucleus
KGN60531.1	nucleosome assembly 1-like 1-like	P	GO:0016043	cellular component organization
KGN60068.1	Plastocyanin chloroplast	C	GO:0016020	membrane
KGN60068.1	Plastocyanin chloroplast	P	GO:0008152	metabolic process
KGN60068.1	Plastocyanin chloroplast	F	GO:0005488	binding
KGN60068.1	Plastocyanin chloroplast	C	GO:0009536	plastid
KGN60068.1	Plastocyanin chloroplast	C	GO:0009579	thylakoid
prf||0911298A	Plastocyanin chloroplast	C	GO:0016020	membrane
prf||0911298A	Plastocyanin chloroplast	P	GO:0008152	metabolic process
prf||0911298A	Plastocyanin chloroplast	F	GO:0005488	binding
prf||0911298A	Plastocyanin chloroplast	C	GO:0009536	plastid
prf||0911298A	Plastocyanin chloroplast	C	GO:0009579	thylakoid
KGN45737.1	ribulose bisphosphate carboxylase oxygenase activase chloroplastic-like	F	GO:0000166	nucleotide binding
KGN50568.1	ribulose bisphosphate carboxylase oxygenase activase chloroplastic-like	F	GO:0000166	nucleotide binding
KGN50568.1	ribulose bisphosphate carboxylase oxygenase activase chloroplastic-like	C	GO:0009536	plastid
CAA47906.1	Ribulose bisphosphate carboxylase oxygenase activase chloroplast	F	GO:0000166	nucleotide binding
CAA47906.1	Ribulose bisphosphate carboxylase oxygenase activase chloroplast	C	GO:0009536	plastid
XP_011656301.1	Ribulose bisphosphate carboxylase oxygenase activase chloroplast	F	GO:0000166	nucleotide binding
XP_011656301.1	Ribulose bisphosphate carboxylase oxygenase activase chloroplast	C	GO:0009536	plastid
XP_011656299.1	Ribulose bisphosphate carboxylase oxygenase activase chloroplast	F	GO:0000166	nucleotide binding
XP_011656299.1	Ribulose bisphosphate carboxylase oxygenase activase chloroplast	C	GO:0009536	plastid
XP_011656297.1	Ribulose bisphosphate carboxylase oxygenase activase chloroplast	F	GO:0000166	nucleotide binding
XP_011656297.1	Ribulose bisphosphate carboxylase oxygenase activase chloroplast	C	GO:0009536	plastid
ABK55669.1	chloroplast ribulose bisphosphate carboxylase oxygenase activase partial	F	GO:0000166	nucleotide binding
ABK55669.1	chloroplast ribulose bisphosphate carboxylase oxygenase activase partial	C	GO:0009536	plastid
ABO36654.1	ribulose bisphosphate carboxylase oxygenase chloroplastic-like	F	GO:0000166	nucleotide binding
ABO36654.1	ribulose bisphosphate carboxylase oxygenase chloroplastic-like	C	GO:0009536	plastid
KGN65908.1	tubulin beta-1 chain-like	F	GO:0000166	nucleotide binding
KGN65908.1	tubulin beta-1 chain-like	C	GO:0005856	cytoskeleton
KGN65908.1	tubulin beta-1 chain-like	C	GO:0005737	cytoplasm
KGN65908.1	tubulin beta-1 chain-like	F	GO:0005198	structural molecule activity
KGN65908.1	tubulin beta-1 chain-like	P	GO:0009987	cellular process
KGN65908.1	tubulin beta-1 chain-like	F	GO:0016787	hydrolase activity
KGN62682.1	tubulin beta-1 chain-like	F	GO:0000166	nucleotide binding
KGN62682.1	tubulin beta-1 chain-like	C	GO:0005856	cytoskeleton
KGN62682.1	tubulin beta-1 chain-like	C	GO:0005737	cytoplasm
KGN62682.1	tubulin beta-1 chain-like	F	GO:0005198	structural molecule activity
KGN62682.1	tubulin beta-1 chain-like	P	GO:0009987	cellular process
KGN62682.1	tubulin beta-1 chain-like	F	GO:0016787	hydrolase activity
KGN64172.1	tubulin beta-1 chain-like	F	GO:0000166	nucleotide binding
KGN64172.1	tubulin beta-1 chain-like	C	GO:0005856	cytoskeleton
KGN64172.1	tubulin beta-1 chain-like	C	GO:0005737	cytoplasm
KGN64172.1	tubulin beta-1 chain-like	F	GO:0005198	structural molecule activity
KGN64172.1	tubulin beta-1 chain-like	P	GO:0009987	cellular process
KGN64172.1	tubulin beta-1 chain-like	F	GO:0016787	hydrolase activity
KGN58809.1	tubulin beta-1 chain-like	F	GO:0000166	nucleotide binding
KGN58809.1	tubulin beta-1 chain-like	P	GO:0009628	response to abiotic stimulus
KGN58809.1	tubulin beta-1 chain-like	C	GO:0005856	cytoskeleton
KGN58809.1	tubulin beta-1 chain-like	F	GO:0005515	protein binding
KGN58809.1	tubulin beta-1 chain-like	C	GO:0016020	membrane
KGN58809.1	tubulin beta-1 chain-like	F	GO:0005198	structural molecule activity
KGN58809.1	tubulin beta-1 chain-like	C	GO:0005794	Golgi apparatus
KGN58809.1	tubulin beta-1 chain-like	P	GO:0009987	cellular process
KGN58809.1	tubulin beta-1 chain-like	P	GO:0006950	response to stress
KGN58809.1	tubulin beta-1 chain-like	F	GO:0016787	hydrolase activity
KGN54346.1	tubulin beta-1 chain-like	F	GO:0000166	nucleotide binding
KGN54346.1	tubulin beta-1 chain-like	C	GO:0005856	cytoskeleton
KGN54346.1	tubulin beta-1 chain-like	C	GO:0016020	membrane
KGN54346.1	tubulin beta-1 chain-like	F	GO:0005198	structural molecule activity
KGN54346.1	tubulin beta-1 chain-like	C	GO:0005794	Golgi apparatus
KGN54346.1	tubulin beta-1 chain-like	P	GO:0009987	cellular process
KGN54346.1	tubulin beta-1 chain-like	F	GO:0016787	hydrolase activity
KGN59749.1	tubulin alpha-1 chain	F	GO:0000166	nucleotide binding
KGN59749.1	tubulin alpha-1 chain	C	GO:0005856	cytoskeleton
KGN59749.1	tubulin alpha-1 chain	C	GO:0005737	cytoplasm
KGN59749.1	tubulin alpha-1 chain	F	GO:0005198	structural molecule activity
KGN59749.1	tubulin alpha-1 chain	P	GO:0009987	cellular process
KGN59749.1	tubulin alpha-1 chain	F	GO:0016787	hydrolase activity
KGN54025.1	tubulin alpha-1 chain	F	GO:0000166	nucleotide binding
KGN54025.1	tubulin alpha-1 chain	C	GO:0005856	cytoskeleton
KGN54025.1	tubulin alpha-1 chain	C	GO:0005737	cytoplasm
KGN54025.1	tubulin alpha-1 chain	F	GO:0005198	structural molecule activity
KGN54025.1	tubulin alpha-1 chain	P	GO:0009987	cellular process
KGN54025.1	tubulin alpha-1 chain	F	GO:0016787	hydrolase activity
KGN58559.1	disease resistance RGA2-like	F	GO:0000166	nucleotide binding
KGN58559.1	disease resistance RGA2-like	P	GO:0006950	response to stress
ABN41481.1	ribulose bisphosphate carboxylase small chloroplastic-like	P	GO:0005975	carbohydrate metabolic process
ABN41481.1	ribulose bisphosphate carboxylase small chloroplastic-like	F	GO:0003824	catalytic activity
ABN41481.1	ribulose bisphosphate carboxylase small chloroplastic-like	P	GO:0015979	photosynthesis
ABN41481.1	ribulose bisphosphate carboxylase small chloroplastic-like	P	GO:0009058	biosynthetic process
ABN41481.1	ribulose bisphosphate carboxylase small chloroplastic-like	C	GO:0009536	plastid
XP_011656300.1	Ribulose bisphosphate carboxylase oxygenase activase chloroplast	F	GO:0000166	nucleotide binding
XP_011656300.1	Ribulose bisphosphate carboxylase oxygenase activase chloroplast	C	GO:0009536	plastid
ACS29559.1	Ribulose bisphosphate carboxylase oxygenase activase chloroplast	F	GO:0000166	nucleotide binding
ACS29559.1	Ribulose bisphosphate carboxylase oxygenase activase chloroplast	C	GO:0009536	plastid
KGN47715.1	PDI-like 1-1 isoform 2	P	GO:0019725	cellular homeostasis
KGN47715.1	PDI-like 1-1 isoform 2	F	GO:0003824	catalytic activity
KGN47715.1	PDI-like 1-1 isoform 2	C	GO:0005783	endoplasmic reticulum
KGN47715.1	PDI-like 1-1 isoform 2	P	GO:0006950	response to stress

## Sheet: BP
Level	GO_ID	Term	Type	Seqs_Num	Sequences
1	GO:0008150	biological_process	Biological Process	50	KGN66170.1, KGN66053.1, KGN50632.1, KGN62682.1, KGN51208.1, AAZ94637.1, KGN46249.1, KGN48464.1, KGN47715.1, KGN65655.1, KGN65908.1, CCF55356.1, ABO09822.1, CAJ00765.1, prf||0911298A, AAK72752.1, KGN54025.1, KGN60531.1, KGN62647.1, KGN59749.1, KGN43793.1, AAZ94668.1, KGN61513.1, KGN54918.1, ADT80721.1, ACO90193.1, KGN58809.1, AAA33131.1, KGN52085.1, ABN41481.1, KGN60068.1, KGN56349.1, KGN60962.1, …
2	GO:0000003	reproduction	Biological Process	1	KGN46860.1
2	GO:0009987	cellular process	Biological Process	46	KGN62647.1, KGN59749.1, KGN43793.1, KGN66170.1, AAZ94668.1, KGN54918.1, ADT80721.1, ACO90193.1, KGN58809.1, AAA33131.1, KGN66053.1, KGN52085.1, KGN50632.1, KGN62682.1, KGN51208.1, AAZ94637.1, ABN41481.1, KGN56349.1, KGN46249.1, KGN48464.1, KGN60962.1, KGN47715.1, KGN49283.1, KGN65655.1, KGN65908.1, AAZ94658.1, CCF55356.1, ABO09822.1, KGN48214.1, KGN43571.1, KGN64172.1, KGN61439.1, CAJ00765.1, XP_…
2	GO:0050896	response to stimulus	Biological Process	12	KGN65655.1, KGN61513.1, ABO09822.1, ADT80721.1, ACO90193.1, KGN58809.1, KGN66053.1, KGN52085.1, KGN51208.1, ABK55683.1, KGN47715.1, KGN58559.1
2	GO:0032501	multicellular organismal process	Biological Process	4	KGN66053.1, KGN46860.1, KGN60962.1, XP_011648845.1
2	GO:0008152	metabolic process	Biological Process	36	KGN62647.1, KGN43793.1, KGN66170.1, AAZ94668.1, KGN54918.1, ADT80721.1, ACO90193.1, AAA33131.1, KGN66053.1, KGN52085.1, KGN50632.1, KGN51208.1, AAZ94637.1, ABN41481.1, KGN60068.1, KGN56349.1, KGN46249.1, KGN48464.1, KGN60962.1, KGN49283.1, KGN65655.1, AAZ94658.1, KGN48214.1, CCF55356.1, ABO09822.1, KGN43571.1, CAJ00765.1, XP_011648845.1, KGN61895.1, prf||0911298A, KGN56609.1, AAK72752.1, ABK55683…
2	GO:0032502	developmental process	Biological Process	4	KGN66053.1, KGN46860.1, KGN60962.1, XP_011648845.1
2	GO:0044699	single-organism process	Biological Process	7	KGN66053.1, KGN61895.1, KGN46860.1, KGN54918.1, KGN60962.1, KGN47715.1, XP_011648845.1
2	GO:0071840	cellular component organization or biogenesis	Biological Process	3	KGN66053.1, KGN46860.1, KGN60531.1
2	GO:0065007	biological regulation	Biological Process	1	KGN47715.1
3	GO:0044767	single-organism developmental process	Biological Process	4	KGN66053.1, KGN46860.1, KGN60962.1, XP_011648845.1
3	GO:0009058	biosynthetic process	Biological Process	17	KGN49283.1, AAZ94658.1, KGN48214.1, CCF55356.1, KGN54918.1, CAJ00765.1, AAA33131.1, KGN66053.1, KGN61895.1, KGN52085.1, KGN50632.1, AAZ94637.1, AAK72752.1, ABN41481.1, KGN56349.1, KGN57792.1, YP_247584.1
3	GO:0009628	response to abiotic stimulus	Biological Process	4	KGN52085.1, KGN51208.1, KGN61513.1, KGN58809.1
3	GO:0016043	cellular component organization	Biological Process	3	KGN66053.1, KGN46860.1, KGN60531.1
3	GO:0044238	primary metabolic process	Biological Process	27	KGN62647.1, KGN43793.1, KGN54918.1, ADT80721.1, ACO90193.1, AAA33131.1, KGN66053.1, KGN52085.1, KGN50632.1, KGN51208.1, AAZ94637.1, ABN41481.1, KGN56349.1, KGN46249.1, KGN60962.1, KGN65655.1, AAZ94658.1, ABO09822.1, CCF55356.1, CAJ00765.1, XP_011648845.1, KGN61895.1, KGN56609.1, AAK72752.1, ABK55683.1, YP_247584.1, KGN62618.1
3	GO:0044707	single-multicellular organism process	Biological Process	4	KGN66053.1, KGN46860.1, KGN60962.1, XP_011648845.1
3	GO:0006950	response to stress	Biological Process	10	KGN66053.1, KGN65655.1, ABO09822.1, KGN61513.1, ADT80721.1, ABK55683.1, ACO90193.1, KGN47715.1, KGN58809.1, KGN58559.1
3	GO:0071704	organic substance metabolic process	Biological Process	27	KGN62647.1, KGN43793.1, KGN54918.1, ADT80721.1, ACO90193.1, AAA33131.1, KGN66053.1, KGN52085.1, KGN50632.1, KGN51208.1, AAZ94637.1, ABN41481.1, KGN56349.1, KGN46249.1, KGN60962.1, KGN65655.1, AAZ94658.1, ABO09822.1, CCF55356.1, CAJ00765.1, XP_011648845.1, KGN61895.1, KGN56609.1, AAK72752.1, ABK55683.1, YP_247584.1, KGN62618.1
3	GO:0044763	single-organism cellular process	Biological Process	1	KGN47715.1
3	GO:0009056	catabolic process	Biological Process	8	KGN62647.1, KGN66053.1, KGN61895.1, KGN50632.1, KGN54918.1, KGN60962.1, XP_011648845.1, KGN62618.1
3	GO:0048856	anatomical structure development	Biological Process	4	KGN66053.1, KGN46860.1, KGN60962.1, XP_011648845.1
3	GO:0006807	nitrogen compound metabolic process	Biological Process	13	KGN43793.1, AAZ94658.1, KGN54918.1, CAJ00765.1, KGN66053.1, KGN61895.1, KGN50632.1, KGN56609.1, AAZ94637.1, AAK72752.1, KGN56349.1, KGN46249.1, YP_247584.1
3	GO:0065008	regulation of biological quality	Biological Process	1	KGN47715.1
3	GO:0044710	single-organism metabolic process	Biological Process	2	KGN61895.1, KGN54918.1
3	GO:0044237	cellular metabolic process	Biological Process	23	KGN43793.1, KGN49283.1, KGN66170.1, AAZ94658.1, AAZ94668.1, CCF55356.1, KGN54918.1, KGN43571.1, CAJ00765.1, AAA33131.1, KGN66053.1, KGN61895.1, KGN52085.1, KGN50632.1, KGN56609.1, KGN51208.1, AAZ94637.1, AAK72752.1, ABN41481.1, KGN56349.1, KGN46249.1, KGN48464.1, YP_247584.1
4	GO:0042592	homeostatic process	Biological Process	1	KGN47715.1
4	GO:0046483	heterocycle metabolic process	Biological Process	12	KGN43793.1, AAZ94658.1, KGN54918.1, CAJ00765.1, KGN66053.1, KGN61895.1, KGN50632.1, KGN56609.1, AAZ94637.1, AAK72752.1, KGN46249.1, YP_247584.1
4	GO:0006139	nucleobase-containing compound metabolic process	Biological Process	12	KGN66053.1, KGN61895.1, KGN43793.1, KGN50632.1, KGN56609.1, AAZ94637.1, AAZ94658.1, AAK72752.1, KGN54918.1, KGN46249.1, YP_247584.1, CAJ00765.1
4	GO:0019538	protein metabolic process	Biological Process	7	KGN62647.1, KGN66053.1, KGN51208.1, KGN56349.1, KGN60962.1, XP_011648845.1, KGN62618.1
4	GO:0015979	photosynthesis	Biological Process	9	AAA33131.1, KGN52085.1, KGN49283.1, KGN51208.1, AAZ94668.1, CCF55356.1, ABN41481.1, KGN48464.1, KGN43571.1
4	GO:1901564	organonitrogen compound metabolic process	Biological Process	1	KGN56349.1
4	GO:0006725	cellular aromatic compound metabolic process	Biological Process	12	KGN43793.1, AAZ94658.1, KGN54918.1, CAJ00765.1, KGN66053.1, KGN61895.1, KGN50632.1, KGN56609.1, AAZ94637.1, AAK72752.1, KGN46249.1, YP_247584.1
4	GO:0005975	carbohydrate metabolic process	Biological Process	12	AAA33131.1, KGN61895.1, KGN52085.1, KGN65655.1, KGN50632.1, ABO09822.1, CCF55356.1, ABN41481.1, KGN54918.1, ADT80721.1, ABK55683.1, ACO90193.1
4	GO:0044249	cellular biosynthetic process	Biological Process	1	KGN56349.1
4	GO:0043170	macromolecule metabolic process	Biological Process	7	KGN62647.1, KGN66053.1, KGN51208.1, KGN56349.1, KGN60962.1, XP_011648845.1, KGN62618.1
4	GO:0007275	multicellular organism development	Biological Process	4	KGN66053.1, KGN46860.1, KGN60962.1, XP_011648845.1
4	GO:0009791	post-embryonic development	Biological Process	1	KGN46860.1
4	GO:0006629	lipid metabolic process	Biological Process	2	KGN61895.1, KGN54918.1
4	GO:0034641	cellular nitrogen compound metabolic process	Biological Process	13	KGN43793.1, AAZ94658.1, KGN54918.1, CAJ00765.1, KGN66053.1, KGN61895.1, KGN50632.1, KGN56609.1, AAZ94637.1, AAK72752.1, KGN56349.1, KGN46249.1, YP_247584.1
4	GO:0006091	generation of precursor metabolites and energy	Biological Process	10	KGN61895.1, KGN43793.1, KGN50632.1, KGN66170.1, KGN51208.1, AAZ94637.1, AAZ94668.1, KGN54918.1, KGN48464.1, YP_247584.1
4	GO:0019725	cellular homeostasis	Biological Process	1	KGN47715.1
4	GO:0044260	cellular macromolecule metabolic process	Biological Process	2	KGN51208.1, KGN56349.1
4	GO:1901360	organic cyclic compound metabolic process	Biological Process	12	KGN43793.1, AAZ94658.1, KGN54918.1, CAJ00765.1, KGN66053.1, KGN61895.1, KGN50632.1, KGN56609.1, AAZ94637.1, AAK72752.1, KGN46249.1, YP_247584.1
4	GO:1901576	organic substance biosynthetic process	Biological Process	1	KGN56349.1
5	GO:0006518	peptide metabolic process	Biological Process	1	KGN56349.1
5	GO:0044267	cellular protein metabolic process	Biological Process	2	KGN51208.1, KGN56349.1
5	GO:0009790	embryo development	Biological Process	1	KGN46860.1
5	GO:1901566	organonitrogen compound biosynthetic process	Biological Process	1	KGN56349.1
5	GO:0010467	gene expression	Biological Process	1	KGN56349.1
5	GO:0043603	cellular amide metabolic process	Biological Process	1	KGN56349.1
5	GO:0034645	cellular macromolecule biosynthetic process	Biological Process	1	KGN56349.1
5	GO:0043412	macromolecule modification	Biological Process	2	KGN51208.1, KGN56349.1
5	GO:0036211	protein modification process	Biological Process	2	KGN51208.1, KGN56349.1
5	GO:0009059	macromolecule biosynthetic process	Biological Process	1	KGN56349.1
5	GO:0044271	cellular nitrogen compound biosynthetic process	Biological Process	1	KGN56349.1
6	GO:0043043	peptide biosynthetic process	Biological Process	1	KGN56349.1
6	GO:0043604	amide biosynthetic process	Biological Process	1	KGN56349.1
6	GO:0006464	cellular protein modification process	Biological Process	2	KGN51208.1, KGN56349.1
6	GO:0006412	translation	Biological Process	1	KGN56349.1

## Sheet: MF
Level	GO_ID	Term	Type	Seqs_Num	Sequences
1	GO:0003674	molecular_function	Molecular Function	69	KGN66170.1, XP_011656301.1, KGN66053.1, KGN58963.1, KGN50632.1, KGN62682.1, KGN51208.1, XP_004138389.1, AAZ94637.1, KGN45846.1, KGN46249.1, KGN48464.1, ABO36654.1, XP_011652060.1, KGN47715.1, KGN65655.1, KGN45737.1, KGN65908.1, ABO09822.1, CCF55356.1, KGN57908.1, CAJ00765.1, prf||0911298A, KGN57401.1, AAK72752.1, KGN54025.1, ABK55669.1, KGN62647.1, KGN59749.1, CAA47906.1, KGN43793.1, AAZ94668.1, …
2	GO:0005198	structural molecule activity	Molecular Function	8	KGN59749.1, KGN62682.1, KGN65908.1, KGN56349.1, KGN54025.1, KGN64172.1, KGN58809.1, KGN54346.1
2	GO:0005215	transporter activity	Molecular Function	5	AAZ94637.1, AAZ94658.1, AAK72752.1, YP_247584.1, CAJ00765.1
2	GO:0005488	binding	Molecular Function	53	KGN66170.1, XP_011656301.1, KGN66053.1, KGN58963.1, KGN62682.1, XP_004138389.1, KGN51208.1, KGN45846.1, AAZ94637.1, ABO36654.1, KGN48464.1, XP_011652060.1, KGN45737.1, KGN65655.1, KGN65908.1, ABO09822.1, CAJ00765.1, prf||0911298A, KGN57401.1, AAK72752.1, KGN54025.1, ABK55669.1, CAA47906.1, KGN59749.1, KGN43793.1, AAZ94668.1, ADT80721.1, ACO90193.1, KGN58809.1, XP_011656300.1, KGN60068.1, KGN60962…
2	GO:0003824	catalytic activity	Molecular Function	39	KGN62647.1, KGN59749.1, KGN43793.1, KGN66170.1, KGN54918.1, ADT80721.1, ACO90193.1, KGN58809.1, AAA33131.1, KGN66053.1, KGN52085.1, KGN50632.1, KGN62682.1, AAZ94637.1, ABN41481.1, KGN46249.1, KGN60962.1, KGN47715.1, KGN49283.1, KGN65655.1, KGN65908.1, AAZ94658.1, ABO09822.1, KGN48214.1, CCF55356.1, KGN43571.1, KGN64172.1, CAJ00765.1, XP_011648845.1, KGN54346.1, KGN61895.1, KGN56609.1, AAK72752.1,…
3	GO:0016740	transferase activity	Molecular Function	3	KGN56609.1, KGN54918.1, KGN46249.1
3	GO:0005515	protein binding	Molecular Function	6	KGN66053.1, KGN57401.1, XP_004139746.2, KGN61439.1, KGN43625.1, KGN58809.1
3	GO:0097159	organic cyclic compound binding	Molecular Function	38	CAA47906.1, KGN59749.1, KGN66170.1, KGN58809.1, XP_011656301.1, KGN66053.1, XP_011656300.1, KGN58963.1, KGN62682.1, XP_004138389.1, KGN45846.1, AAZ94637.1, ABO36654.1, KGN60962.1, XP_011652060.1, KGN49283.1, KGN45737.1, KGN65908.1, AAZ94658.1, XP_011656299.1, XP_011656297.1, XP_004147619.1, ACS29559.1, KGN64172.1, KGN61439.1, CAJ00765.1, XP_011648845.1, KGN54346.1, KGN57185.1, KGN46860.1, AAK7275…
3	GO:0016787	hydrolase activity	Molecular Function	19	KGN62647.1, KGN59749.1, KGN43793.1, KGN65908.1, AAZ94658.1, KGN64172.1, CAJ00765.1, XP_011648845.1, KGN58809.1, KGN54346.1, KGN66053.1, KGN50632.1, KGN62682.1, AAZ94637.1, AAK72752.1, KGN54025.1, KGN60962.1, YP_247584.1, KGN62618.1
3	GO:1901363	heterocyclic compound binding	Molecular Function	38	CAA47906.1, KGN59749.1, KGN66170.1, KGN58809.1, XP_011656301.1, KGN66053.1, XP_011656300.1, KGN58963.1, KGN62682.1, XP_004138389.1, KGN45846.1, AAZ94637.1, ABO36654.1, KGN60962.1, XP_011652060.1, KGN49283.1, KGN45737.1, KGN65908.1, AAZ94658.1, XP_011656299.1, XP_011656297.1, XP_004147619.1, ACS29559.1, KGN64172.1, KGN61439.1, CAJ00765.1, XP_011648845.1, KGN54346.1, KGN57185.1, KGN46860.1, AAK7275…
3	GO:0036094	small molecule binding	Molecular Function	33	CAA47906.1, KGN59749.1, KGN66170.1, KGN58809.1, XP_011656301.1, KGN66053.1, XP_011656300.1, KGN58963.1, KGN62682.1, AAZ94637.1, ABO36654.1, KGN60962.1, KGN49283.1, KGN45737.1, KGN65908.1, AAZ94658.1, XP_011656299.1, XP_011656297.1, ACS29559.1, KGN64172.1, KGN61439.1, CAJ00765.1, XP_011648845.1, KGN54346.1, KGN46860.1, AAK72752.1, XP_004139746.2, KGN54025.1, KGN50568.1, ABK55669.1, KGN57792.1, YP_…
4	GO:1901265	nucleoside phosphate binding	Molecular Function	33	CAA47906.1, KGN59749.1, KGN66170.1, KGN58809.1, XP_011656301.1, KGN66053.1, XP_011656300.1, KGN58963.1, KGN62682.1, AAZ94637.1, ABO36654.1, KGN60962.1, KGN49283.1, KGN45737.1, KGN65908.1, AAZ94658.1, XP_011656299.1, XP_011656297.1, ACS29559.1, KGN64172.1, KGN61439.1, CAJ00765.1, XP_011648845.1, KGN54346.1, KGN46860.1, AAK72752.1, XP_004139746.2, KGN54025.1, KGN50568.1, ABK55669.1, KGN57792.1, YP_…
4	GO:0003676	nucleic acid binding	Molecular Function	6	KGN57185.1, KGN58963.1, XP_004138389.1, KGN45846.1, XP_004147619.1, XP_011652060.1
4	GO:0000166	nucleotide binding	Molecular Function	33	CAA47906.1, KGN59749.1, KGN66170.1, KGN58809.1, XP_011656301.1, KGN66053.1, XP_011656300.1, KGN58963.1, KGN62682.1, AAZ94637.1, ABO36654.1, KGN60962.1, KGN49283.1, KGN45737.1, KGN65908.1, AAZ94658.1, XP_011656299.1, XP_011656297.1, ACS29559.1, KGN64172.1, KGN61439.1, CAJ00765.1, XP_011648845.1, KGN54346.1, KGN46860.1, AAK72752.1, XP_004139746.2, KGN54025.1, KGN50568.1, ABK55669.1, KGN57792.1, YP_…
5	GO:0003723	RNA binding	Molecular Function	3	XP_004138389.1, KGN45846.1, XP_011652060.1
6	GO:0008135	translation factor activity, RNA binding	Molecular Function	3	XP_004138389.1, KGN45846.1, XP_011652060.1

## Sheet: CC
Level	GO_ID	Term	Type	Seqs_Num	Sequences
1	GO:0005575	cellular_component	Cellular Component	54	KGN66170.1, XP_011656301.1, KGN66053.1, KGN62682.1, KGN51208.1, XP_004138389.1, AAZ94637.1, KGN45846.1, KGN48464.1, ABO36654.1, XP_011652060.1, KGN47715.1, KGN65908.1, CCF55356.1, CAJ00765.1, prf||0911298A, AAK72752.1, KGN54025.1, KGN60531.1, ABK55669.1, KGN62647.1, KGN59749.1, CAA47906.1, KGN43793.1, KGN44928.1, AAZ94668.1, KGN61513.1, KGN54918.1, KGN58809.1, AAA33131.1, XP_011656300.1, KGN52085…
2	GO:0005623	cell	Cellular Component	54	KGN66170.1, XP_011656301.1, KGN66053.1, KGN62682.1, XP_004138389.1, KGN51208.1, AAZ94637.1, KGN45846.1, KGN48464.1, ABO36654.1, XP_011652060.1, KGN47715.1, KGN65908.1, CCF55356.1, CAJ00765.1, prf||0911298A, AAK72752.1, KGN54025.1, KGN60531.1, ABK55669.1, KGN62647.1, KGN59749.1, CAA47906.1, KGN43793.1, KGN44928.1, AAZ94668.1, KGN61513.1, KGN54918.1, KGN58809.1, AAA33131.1, XP_011656300.1, KGN52085…
2	GO:0005576	extracellular region	Cellular Component	3	KGN62647.1, KGN46860.1, KGN52085.1
2	GO:0016020	membrane	Cellular Component	19	KGN44928.1, AAZ94658.1, AAZ94668.1, KGN61513.1, KGN54918.1, KGN43571.1, CAJ00765.1, KGN58809.1, KGN54346.1, KGN46860.1, KGN52085.1, prf||0911298A, XP_004138389.1, KGN51208.1, AAZ94637.1, AAK72752.1, KGN60068.1, KGN48464.1, YP_247584.1
2	GO:0044421	extracellular region part	Cellular Component	1	KGN62647.1
2	GO:0044464	cell part	Cellular Component	54	KGN66170.1, XP_011656301.1, KGN66053.1, KGN62682.1, XP_004138389.1, KGN51208.1, AAZ94637.1, KGN45846.1, KGN48464.1, ABO36654.1, XP_011652060.1, KGN47715.1, KGN65908.1, CCF55356.1, CAJ00765.1, prf||0911298A, AAK72752.1, KGN54025.1, KGN60531.1, ABK55669.1, KGN62647.1, KGN59749.1, CAA47906.1, KGN43793.1, KGN44928.1, AAZ94668.1, KGN61513.1, KGN54918.1, KGN58809.1, AAA33131.1, XP_011656300.1, KGN52085…
2	GO:0032991	macromolecular complex	Cellular Component	6	KGN46860.1, KGN52085.1, XP_004138389.1, KGN45846.1, KGN56349.1, XP_011652060.1
2	GO:0043226	organelle	Cellular Component	47	KGN62647.1, CAA47906.1, KGN59749.1, AAZ94668.1, KGN54918.1, KGN58809.1, AAA33131.1, XP_011656301.1, XP_011656300.1, KGN66053.1, KGN52085.1, KGN62682.1, XP_004138389.1, KGN51208.1, KGN45846.1, AAZ94637.1, KGN60068.1, ABN41481.1, KGN56349.1, KGN48464.1, ABO36654.1, KGN60962.1, XP_011652060.1, KGN47715.1, KGN49283.1, KGN65908.1, AAZ94658.1, CCF55356.1, XP_011656299.1, XP_011656297.1, KGN43571.1, XP_…
3	GO:1990904	ribonucleoprotein complex	Cellular Component	6	KGN46860.1, KGN52085.1, XP_004138389.1, KGN45846.1, KGN56349.1, XP_011652060.1
3	GO:0005622	intracellular	Cellular Component	54	KGN66170.1, XP_011656301.1, KGN66053.1, KGN62682.1, XP_004138389.1, KGN51208.1, KGN45846.1, AAZ94637.1, KGN48464.1, ABO36654.1, XP_011652060.1, KGN47715.1, KGN65908.1, CCF55356.1, CAJ00765.1, prf||0911298A, AAK72752.1, KGN54025.1, KGN60531.1, ABK55669.1, KGN62647.1, CAA47906.1, KGN59749.1, KGN43793.1, KGN44928.1, AAZ94668.1, KGN61513.1, KGN54918.1, KGN58809.1, AAA33131.1, XP_011656300.1, KGN52085…
3	GO:0005615	extracellular space	Cellular Component	1	KGN62647.1
3	GO:0043227	membrane-bounded organelle	Cellular Component	39	KGN62647.1, CAA47906.1, AAZ94668.1, KGN54918.1, KGN58809.1, AAA33131.1, XP_011656301.1, KGN66053.1, XP_011656300.1, KGN52085.1, KGN51208.1, AAZ94637.1, KGN60068.1, ABN41481.1, KGN56349.1, KGN48464.1, ABO36654.1, KGN60962.1, KGN47715.1, KGN49283.1, AAZ94658.1, CCF55356.1, XP_011656299.1, XP_011656297.1, KGN43571.1, XP_004147619.1, ACS29559.1, XP_011648845.1, CAJ00765.1, KGN54346.1, KGN57185.1, KGN…
3	GO:0043229	intracellular organelle	Cellular Component	47	KGN62647.1, KGN59749.1, CAA47906.1, AAZ94668.1, KGN54918.1, KGN58809.1, AAA33131.1, XP_011656301.1, KGN66053.1, XP_011656300.1, KGN52085.1, KGN62682.1, XP_004138389.1, KGN51208.1, KGN45846.1, AAZ94637.1, KGN60068.1, ABN41481.1, KGN56349.1, KGN48464.1, ABO36654.1, KGN60962.1, XP_011652060.1, KGN47715.1, KGN49283.1, KGN65908.1, AAZ94658.1, CCF55356.1, XP_011656299.1, XP_011656297.1, KGN43571.1, XP_…
3	GO:0012505	endomembrane system	Cellular Component	3	KGN47715.1, KGN58809.1, KGN54346.1
3	GO:0005886	plasma membrane	Cellular Component	5	KGN44928.1, XP_004138389.1, AAZ94637.1, AAZ94658.1, CAJ00765.1
3	GO:0044424	intracellular part	Cellular Component	54	KGN66170.1, XP_011656301.1, KGN66053.1, KGN62682.1, XP_004138389.1, KGN51208.1, KGN45846.1, AAZ94637.1, KGN48464.1, ABO36654.1, XP_011652060.1, KGN47715.1, KGN65908.1, CCF55356.1, CAJ00765.1, prf||0911298A, AAK72752.1, KGN54025.1, KGN60531.1, ABK55669.1, KGN62647.1, CAA47906.1, KGN59749.1, KGN43793.1, KGN44928.1, AAZ94668.1, KGN61513.1, KGN54918.1, KGN58809.1, AAA33131.1, XP_011656300.1, KGN52085…
3	GO:0030312	external encapsulating structure	Cellular Component	1	KGN52085.1
3	GO:0043228	non-membrane-bounded organelle	Cellular Component	13	KGN59749.1, KGN65908.1, KGN64172.1, KGN58809.1, KGN54346.1, KGN46860.1, KGN52085.1, KGN62682.1, XP_004138389.1, KGN45846.1, KGN56349.1, KGN54025.1, XP_011652060.1
3	GO:0071944	cell periphery	Cellular Component	6	KGN52085.1, KGN44928.1, XP_004138389.1, AAZ94637.1, AAZ94658.1, CAJ00765.1
4	GO:0043232	intracellular non-membrane-bounded organelle	Cellular Component	13	KGN59749.1, KGN65908.1, KGN64172.1, KGN58809.1, KGN54346.1, KGN46860.1, KGN52085.1, KGN62682.1, XP_004138389.1, KGN45846.1, KGN56349.1, KGN54025.1, XP_011652060.1
4	GO:0030529	intracellular ribonucleoprotein complex	Cellular Component	6	KGN46860.1, KGN52085.1, XP_004138389.1, KGN45846.1, KGN56349.1, XP_011652060.1
4	GO:0005794	Golgi apparatus	Cellular Component	2	KGN58809.1, KGN54346.1
4	GO:0005783	endoplasmic reticulum	Cellular Component	1	KGN47715.1
4	GO:0043231	intracellular membrane-bounded organelle	Cellular Component	39	KGN62647.1, CAA47906.1, AAZ94668.1, KGN54918.1, KGN58809.1, AAA33131.1, XP_011656301.1, KGN66053.1, XP_011656300.1, KGN52085.1, KGN51208.1, AAZ94637.1, KGN60068.1, ABN41481.1, KGN56349.1, KGN48464.1, ABO36654.1, KGN60962.1, KGN47715.1, KGN49283.1, AAZ94658.1, CCF55356.1, XP_011656299.1, XP_011656297.1, KGN43571.1, XP_004147619.1, ACS29559.1, XP_011648845.1, CAJ00765.1, KGN54346.1, KGN57185.1, KGN…
4	GO:0005737	cytoplasm	Cellular Component	53	KGN66170.1, XP_011656301.1, KGN66053.1, KGN62682.1, XP_004138389.1, KGN51208.1, KGN45846.1, AAZ94637.1, KGN48464.1, ABO36654.1, XP_011652060.1, KGN47715.1, KGN65908.1, CCF55356.1, CAJ00765.1, prf||0911298A, AAK72752.1, KGN54025.1, ABK55669.1, KGN62647.1, CAA47906.1, KGN59749.1, KGN43793.1, KGN44928.1, AAZ94668.1, KGN61513.1, KGN54918.1, KGN58809.1, AAA33131.1, XP_011656300.1, KGN52085.1, KGN60068…
4	GO:0044444	cytoplasmic part	Cellular Component	42	KGN62647.1, CAA47906.1, KGN44928.1, AAZ94668.1, KGN54918.1, KGN58809.1, AAA33131.1, XP_011656301.1, KGN66053.1, XP_011656300.1, KGN52085.1, XP_004138389.1, KGN51208.1, KGN45846.1, AAZ94637.1, KGN60068.1, ABN41481.1, KGN56349.1, KGN48464.1, ABO36654.1, KGN60962.1, XP_011652060.1, KGN47715.1, KGN49283.1, AAZ94658.1, CCF55356.1, XP_011656299.1, XP_011656297.1, KGN43571.1, XP_004147619.1, ACS29559.1,…
4	GO:0005618	cell wall	Cellular Component	1	KGN52085.1
4	GO:0009579	thylakoid	Cellular Component	13	AAZ94658.1, AAZ94668.1, KGN43571.1, CAJ00765.1, KGN46860.1, KGN52085.1, prf||0911298A, KGN51208.1, AAZ94637.1, AAK72752.1, KGN60068.1, KGN48464.1, YP_247584.1
5	GO:0005773	vacuole	Cellular Component	2	KGN62647.1, KGN54918.1
5	GO:0005634	nucleus	Cellular Component	6	KGN66053.1, KGN56349.1, KGN60962.1, KGN60531.1, XP_011648845.1, KGN62618.1
5	GO:0005856	cytoskeleton	Cellular Component	7	KGN59749.1, KGN62682.1, KGN65908.1, KGN54025.1, KGN64172.1, KGN58809.1, KGN54346.1
5	GO:0005840	ribosome	Cellular Component	6	KGN46860.1, KGN52085.1, XP_004138389.1, KGN45846.1, KGN56349.1, XP_011652060.1
5	GO:0005829	cytosol	Cellular Component	10	KGN66053.1, KGN61895.1, KGN46860.1, KGN52085.1, KGN44928.1, XP_004138389.1, KGN54918.1, KGN56349.1, KGN60962.1, XP_011648845.1
5	GO:0009536	plastid	Cellular Component	29	CAA47906.1, AAZ94668.1, KGN54918.1, AAA33131.1, XP_011656301.1, XP_011656300.1, KGN52085.1, KGN51208.1, AAZ94637.1, KGN60068.1, ABN41481.1, KGN48464.1, ABO36654.1, KGN49283.1, AAZ94658.1, CCF55356.1, XP_011656299.1, XP_011656297.1, KGN43571.1, XP_004147619.1, ACS29559.1, CAJ00765.1, KGN57185.1, KGN46860.1, prf||0911298A, AAK72752.1, KGN50568.1, ABK55669.1, YP_247584.1
5	GO:0005739	mitochondrion	Cellular Component	1	KGN46860.1
6	GO:0000323	lytic vacuole	Cellular Component	1	KGN62647.1
7	GO:0005764	lysosome	Cellular Component	1	KGN62647.1
