# Supplementary material for: The role and proteomic analysis of ethylene in hydrogen gas-induced adventitious rooting development in cucumber (Cucumis sativus L.) explants
Source: PeerJ. 2020 Apr 7;8:e8896. doi: 10.7717/peerj.8896 (PMC7147439; doi:10.7717/peerj.8896)
Supplement: Supplemental Information 7 [file peerj-08-8896-s013.xlsx]

## Sheet: query2map
Protein_ID	KO	Name	Definition	Map_ID	Map_Name	URL
KGN57792.1	K01915	glnA, GLUL	glutamine synthetase [EC:6.3.1.2;]	map00220	Arginine biosynthesis	http://www.kegg.jp/kegg-bin/show_pathway?map00220+K01915
KGN57792.1	K01915	glnA, GLUL	glutamine synthetase [EC:6.3.1.2;]	map00250	Alanine, aspartate and glutamate metabolism	http://www.kegg.jp/kegg-bin/show_pathway?map00250+K01915
KGN57792.1	K01915	glnA, GLUL	glutamine synthetase [EC:6.3.1.2;]	map00630	Glyoxylate and dicarboxylate metabolism	http://www.kegg.jp/kegg-bin/show_pathway?map00630+K01915
KGN57792.1	K01915	glnA, GLUL	glutamine synthetase [EC:6.3.1.2;]	map00910	Nitrogen metabolism	http://www.kegg.jp/kegg-bin/show_pathway?map00910+K01915
KGN57792.1	K01915	glnA, GLUL	glutamine synthetase [EC:6.3.1.2;]	map01230	Biosynthesis of amino acids	http://www.kegg.jp/kegg-bin/show_pathway?map01230+K01915
KGN57792.1	K01915	glnA, GLUL	glutamine synthetase [EC:6.3.1.2;]	map02020	Two-component system	http://www.kegg.jp/kegg-bin/show_pathway?map02020+K01915
KGN57792.1	K01915	glnA, GLUL	glutamine synthetase [EC:6.3.1.2;]	map04724	Glutamatergic synapse	http://www.kegg.jp/kegg-bin/show_pathway?map04724+K01915
KGN57792.1	K01915	glnA, GLUL	glutamine synthetase [EC:6.3.1.2;]	map04727	GABAergic synapse	http://www.kegg.jp/kegg-bin/show_pathway?map04727+K01915
KGN57908.1
KGN52085.1	K01602	rbcS	ribulose-bisphosphate carboxylase small chain [EC:4.1.1.39;]	map00630	Glyoxylate and dicarboxylate metabolism	http://www.kegg.jp/kegg-bin/show_pathway?map00630+K01602
KGN52085.1	K01602	rbcS	ribulose-bisphosphate carboxylase small chain [EC:4.1.1.39;]	map00710	Carbon fixation in photosynthetic organisms	http://www.kegg.jp/kegg-bin/show_pathway?map00710+K01602
KGN52085.1	K01602	rbcS	ribulose-bisphosphate carboxylase small chain [EC:4.1.1.39;]	map01200	Carbon metabolism	http://www.kegg.jp/kegg-bin/show_pathway?map01200+K01602
AAA33131.1	K01602	rbcS	ribulose-bisphosphate carboxylase small chain [EC:4.1.1.39;]	map00630	Glyoxylate and dicarboxylate metabolism	http://www.kegg.jp/kegg-bin/show_pathway?map00630+K01602
AAA33131.1	K01602	rbcS	ribulose-bisphosphate carboxylase small chain [EC:4.1.1.39;]	map00710	Carbon fixation in photosynthetic organisms	http://www.kegg.jp/kegg-bin/show_pathway?map00710+K01602
AAA33131.1	K01602	rbcS	ribulose-bisphosphate carboxylase small chain [EC:4.1.1.39;]	map01200	Carbon metabolism	http://www.kegg.jp/kegg-bin/show_pathway?map01200+K01602
KGN44928.1
KGN65655.1	K00434	E1.11.1.11	L-ascorbate peroxidase [EC:1.11.1.11;]	map00053	Ascorbate and aldarate metabolism	http://www.kegg.jp/kegg-bin/show_pathway?map00053+K00434
KGN65655.1	K00434	E1.11.1.11	L-ascorbate peroxidase [EC:1.11.1.11;]	map00480	Glutathione metabolism	http://www.kegg.jp/kegg-bin/show_pathway?map00480+K00434
ACO90193.1	K00434	E1.11.1.11	L-ascorbate peroxidase [EC:1.11.1.11;]	map00053	Ascorbate and aldarate metabolism	http://www.kegg.jp/kegg-bin/show_pathway?map00053+K00434
ACO90193.1	K00434	E1.11.1.11	L-ascorbate peroxidase [EC:1.11.1.11;]	map00480	Glutathione metabolism	http://www.kegg.jp/kegg-bin/show_pathway?map00480+K00434
ADT80721.1	K00434	E1.11.1.11	L-ascorbate peroxidase [EC:1.11.1.11;]	map00053	Ascorbate and aldarate metabolism	http://www.kegg.jp/kegg-bin/show_pathway?map00053+K00434
ADT80721.1	K00434	E1.11.1.11	L-ascorbate peroxidase [EC:1.11.1.11;]	map00480	Glutathione metabolism	http://www.kegg.jp/kegg-bin/show_pathway?map00480+K00434
KGN54918.1	K01803	TPI, tpiA	triosephosphate isomerase (TIM) [EC:5.3.1.1;]	map00010	Glycolysis / Gluconeogenesis	http://www.kegg.jp/kegg-bin/show_pathway?map00010+K01803
KGN54918.1	K01803	TPI, tpiA	triosephosphate isomerase (TIM) [EC:5.3.1.1;]	map00051	Fructose and mannose metabolism	http://www.kegg.jp/kegg-bin/show_pathway?map00051+K01803
KGN54918.1	K01803	TPI, tpiA	triosephosphate isomerase (TIM) [EC:5.3.1.1;]	map00562	Inositol phosphate metabolism	http://www.kegg.jp/kegg-bin/show_pathway?map00562+K01803
KGN54918.1	K01803	TPI, tpiA	triosephosphate isomerase (TIM) [EC:5.3.1.1;]	map00710	Carbon fixation in photosynthetic organisms	http://www.kegg.jp/kegg-bin/show_pathway?map00710+K01803
KGN54918.1	K01803	TPI, tpiA	triosephosphate isomerase (TIM) [EC:5.3.1.1;]	map01200	Carbon metabolism	http://www.kegg.jp/kegg-bin/show_pathway?map01200+K01803
KGN54918.1	K01803	TPI, tpiA	triosephosphate isomerase (TIM) [EC:5.3.1.1;]	map01230	Biosynthesis of amino acids	http://www.kegg.jp/kegg-bin/show_pathway?map01230+K01803
ABK55683.1
ABO09822.1
KGN61895.1	K01803	TPI, tpiA	triosephosphate isomerase (TIM) [EC:5.3.1.1;]	map00010	Glycolysis / Gluconeogenesis	http://www.kegg.jp/kegg-bin/show_pathway?map00010+K01803
KGN61895.1	K01803	TPI, tpiA	triosephosphate isomerase (TIM) [EC:5.3.1.1;]	map00051	Fructose and mannose metabolism	http://www.kegg.jp/kegg-bin/show_pathway?map00051+K01803
KGN61895.1	K01803	TPI, tpiA	triosephosphate isomerase (TIM) [EC:5.3.1.1;]	map00562	Inositol phosphate metabolism	http://www.kegg.jp/kegg-bin/show_pathway?map00562+K01803
KGN61895.1	K01803	TPI, tpiA	triosephosphate isomerase (TIM) [EC:5.3.1.1;]	map00710	Carbon fixation in photosynthetic organisms	http://www.kegg.jp/kegg-bin/show_pathway?map00710+K01803
KGN61895.1	K01803	TPI, tpiA	triosephosphate isomerase (TIM) [EC:5.3.1.1;]	map01200	Carbon metabolism	http://www.kegg.jp/kegg-bin/show_pathway?map01200+K01803
KGN61895.1	K01803	TPI, tpiA	triosephosphate isomerase (TIM) [EC:5.3.1.1;]	map01230	Biosynthesis of amino acids	http://www.kegg.jp/kegg-bin/show_pathway?map01230+K01803
KGN50632.1	K01100	E3.1.3.37	sedoheptulose-bisphosphatase [EC:3.1.3.37;]	map00710	Carbon fixation in photosynthetic organisms	http://www.kegg.jp/kegg-bin/show_pathway?map00710+K01100
KGN50632.1	K01100	E3.1.3.37	sedoheptulose-bisphosphatase [EC:3.1.3.37;]	map01200	Carbon metabolism	http://www.kegg.jp/kegg-bin/show_pathway?map01200+K01100
KGN49283.1	K03405	chlI, bchI	magnesium chelatase subunit I [EC:6.6.1.1;]	map00860	Porphyrin and chlorophyll metabolism	http://www.kegg.jp/kegg-bin/show_pathway?map00860+K03405
XP_011653612.1
XP_011653611.1
XP_011652060.1	K03232	EEF1B	elongation factor 1-beta
XP_004138389.1	K03232	EEF1B	elongation factor 1-beta
KGN45846.1	K03232	EEF1B	elongation factor 1-beta
KGN48464.1	K02716	psbO	photosystem II oxygen-evolving enhancer protein 1	map00195	Photosynthesis	http://www.kegg.jp/kegg-bin/show_pathway?map00195+K02716
KGN43571.1	K02636	petC	cytochrome b6-f complex iron-sulfur subunit [EC:1.10.9.1;]	map00195	Photosynthesis	http://www.kegg.jp/kegg-bin/show_pathway?map00195+K02636
KGN56609.1	K00615	E2.2.1.1, tktA, tktB	transketolase [EC:2.2.1.1;]	map00030	Pentose phosphate pathway	http://www.kegg.jp/kegg-bin/show_pathway?map00030+K00615
KGN56609.1	K00615	E2.2.1.1, tktA, tktB	transketolase [EC:2.2.1.1;]	map00710	Carbon fixation in photosynthetic organisms	http://www.kegg.jp/kegg-bin/show_pathway?map00710+K00615
KGN56609.1	K00615	E2.2.1.1, tktA, tktB	transketolase [EC:2.2.1.1;]	map01051	Biosynthesis of ansamycins	http://www.kegg.jp/kegg-bin/show_pathway?map01051+K00615
KGN56609.1	K00615	E2.2.1.1, tktA, tktB	transketolase [EC:2.2.1.1;]	map01200	Carbon metabolism	http://www.kegg.jp/kegg-bin/show_pathway?map01200+K00615
KGN56609.1	K00615	E2.2.1.1, tktA, tktB	transketolase [EC:2.2.1.1;]	map01230	Biosynthesis of amino acids	http://www.kegg.jp/kegg-bin/show_pathway?map01230+K00615
KGN46249.1	K00615	E2.2.1.1, tktA, tktB	transketolase [EC:2.2.1.1;]	map00030	Pentose phosphate pathway	http://www.kegg.jp/kegg-bin/show_pathway?map00030+K00615
KGN46249.1	K00615	E2.2.1.1, tktA, tktB	transketolase [EC:2.2.1.1;]	map00710	Carbon fixation in photosynthetic organisms	http://www.kegg.jp/kegg-bin/show_pathway?map00710+K00615
KGN46249.1	K00615	E2.2.1.1, tktA, tktB	transketolase [EC:2.2.1.1;]	map01051	Biosynthesis of ansamycins	http://www.kegg.jp/kegg-bin/show_pathway?map01051+K00615
KGN46249.1	K00615	E2.2.1.1, tktA, tktB	transketolase [EC:2.2.1.1;]	map01200	Carbon metabolism	http://www.kegg.jp/kegg-bin/show_pathway?map01200+K00615
KGN46249.1	K00615	E2.2.1.1, tktA, tktB	transketolase [EC:2.2.1.1;]	map01230	Biosynthesis of amino acids	http://www.kegg.jp/kegg-bin/show_pathway?map01230+K00615
AAZ94637.1	K02111	ATPF1A, atpA	F-type H+-transporting ATPase subunit alpha [EC:3.6.3.14;]	map00190	Oxidative phosphorylation	http://www.kegg.jp/kegg-bin/show_pathway?map00190+K02111
AAZ94637.1	K02111	ATPF1A, atpA	F-type H+-transporting ATPase subunit alpha [EC:3.6.3.14;]	map00195	Photosynthesis	http://www.kegg.jp/kegg-bin/show_pathway?map00195+K02111
YP_247584.1	K02111	ATPF1A, atpA	F-type H+-transporting ATPase subunit alpha [EC:3.6.3.14;]	map00190	Oxidative phosphorylation	http://www.kegg.jp/kegg-bin/show_pathway?map00190+K02111
YP_247584.1	K02111	ATPF1A, atpA	F-type H+-transporting ATPase subunit alpha [EC:3.6.3.14;]	map00195	Photosynthesis	http://www.kegg.jp/kegg-bin/show_pathway?map00195+K02111
CAJ00765.1	K02112	ATPF1B, atpD	F-type H+-transporting ATPase subunit beta [EC:3.6.3.14;]	map00190	Oxidative phosphorylation	http://www.kegg.jp/kegg-bin/show_pathway?map00190+K02112
CAJ00765.1	K02112	ATPF1B, atpD	F-type H+-transporting ATPase subunit beta [EC:3.6.3.14;]	map00195	Photosynthesis	http://www.kegg.jp/kegg-bin/show_pathway?map00195+K02112
AAZ94658.1	K02112	ATPF1B, atpD	F-type H+-transporting ATPase subunit beta [EC:3.6.3.14;]	map00190	Oxidative phosphorylation	http://www.kegg.jp/kegg-bin/show_pathway?map00190+K02112
AAZ94658.1	K02112	ATPF1B, atpD	F-type H+-transporting ATPase subunit beta [EC:3.6.3.14;]	map00195	Photosynthesis	http://www.kegg.jp/kegg-bin/show_pathway?map00195+K02112
AAK72752.1	K02112	ATPF1B, atpD	F-type H+-transporting ATPase subunit beta [EC:3.6.3.14;]	map00190	Oxidative phosphorylation	http://www.kegg.jp/kegg-bin/show_pathway?map00190+K02112
AAK72752.1	K02112	ATPF1B, atpD	F-type H+-transporting ATPase subunit beta [EC:3.6.3.14;]	map00195	Photosynthesis	http://www.kegg.jp/kegg-bin/show_pathway?map00195+K02112
KGN57907.1
KGN57905.1
KGN66053.1	K03065	PSMC3, RPT5	26S proteasome regulatory subunit T5	map03050	Proteasome	http://www.kegg.jp/kegg-bin/show_pathway?map03050+K03065
KGN66053.1	K03065	PSMC3, RPT5	26S proteasome regulatory subunit T5	map05169	Epstein-Barr virus infection	http://www.kegg.jp/kegg-bin/show_pathway?map05169+K03065
XP_011648845.1	K03065	PSMC3, RPT5	26S proteasome regulatory subunit T5	map03050	Proteasome	http://www.kegg.jp/kegg-bin/show_pathway?map03050+K03065
XP_011648845.1	K03065	PSMC3, RPT5	26S proteasome regulatory subunit T5	map05169	Epstein-Barr virus infection	http://www.kegg.jp/kegg-bin/show_pathway?map05169+K03065
KGN60962.1	K03065	PSMC3, RPT5	26S proteasome regulatory subunit T5	map03050	Proteasome	http://www.kegg.jp/kegg-bin/show_pathway?map03050+K03065
KGN60962.1	K03065	PSMC3, RPT5	26S proteasome regulatory subunit T5	map05169	Epstein-Barr virus infection	http://www.kegg.jp/kegg-bin/show_pathway?map05169+K03065
KGN46860.1
KGN48214.1	K01754	E4.3.1.19, ilvA, tdcB	threonine dehydratase [EC:4.3.1.19;]	map00260	Glycine, serine and threonine metabolism	http://www.kegg.jp/kegg-bin/show_pathway?map00260+K01754
KGN48214.1	K01754	E4.3.1.19, ilvA, tdcB	threonine dehydratase [EC:4.3.1.19;]	map00290	Valine, leucine and isoleucine biosynthesis	http://www.kegg.jp/kegg-bin/show_pathway?map00290+K01754
KGN48214.1	K01754	E4.3.1.19, ilvA, tdcB	threonine dehydratase [EC:4.3.1.19;]	map01200	Carbon metabolism	http://www.kegg.jp/kegg-bin/show_pathway?map01200+K01754
KGN48214.1	K01754	E4.3.1.19, ilvA, tdcB	threonine dehydratase [EC:4.3.1.19;]	map01230	Biosynthesis of amino acids	http://www.kegg.jp/kegg-bin/show_pathway?map01230+K01754
AAZ94668.1	K02707	psbE	photosystem II cytochrome b559 subunit alpha	map00195	Photosynthesis	http://www.kegg.jp/kegg-bin/show_pathway?map00195+K02707
KGN62618.1	K02725	PSMA1	20S proteasome subunit alpha 6 [EC:3.4.25.1;]	map03050	Proteasome	http://www.kegg.jp/kegg-bin/show_pathway?map03050+K02725
KGN57117.1
KGN66170.1	K00029	E1.1.1.40, maeB	malate dehydrogenase (oxaloacetate-decarboxylating)(NADP+) [EC:1.1.1.40;]	map00620	Pyruvate metabolism	http://www.kegg.jp/kegg-bin/show_pathway?map00620+K00029
KGN66170.1	K00029	E1.1.1.40, maeB	malate dehydrogenase (oxaloacetate-decarboxylating)(NADP+) [EC:1.1.1.40;]	map00710	Carbon fixation in photosynthetic organisms	http://www.kegg.jp/kegg-bin/show_pathway?map00710+K00029
KGN66170.1	K00029	E1.1.1.40, maeB	malate dehydrogenase (oxaloacetate-decarboxylating)(NADP+) [EC:1.1.1.40;]	map01200	Carbon metabolism	http://www.kegg.jp/kegg-bin/show_pathway?map01200+K00029
KGN51208.1	K08907	LHCA1	light-harvesting complex I chlorophyll a/b binding protein 1	map00196	Photosynthesis - antenna proteins	http://www.kegg.jp/kegg-bin/show_pathway?map00196+K08907
KGN56349.1	K02942	RP-LP1, RPLP1	large subunit ribosomal protein LP1	map03010	Ribosome	http://www.kegg.jp/kegg-bin/show_pathway?map03010+K02942
KGN43793.1	K01507	ppa	inorganic pyrophosphatase [EC:3.6.1.1;]	map00190	Oxidative phosphorylation	http://www.kegg.jp/kegg-bin/show_pathway?map00190+K01507
KGN62647.1	K01373	CTSF	cathepsin F [EC:3.4.22.41;]	map04142	Lysosome	http://www.kegg.jp/kegg-bin/show_pathway?map04142+K01373
KGN62647.1	K01373	CTSF	cathepsin F [EC:3.4.22.41;]	map04210	Apoptosis	http://www.kegg.jp/kegg-bin/show_pathway?map04210+K01373
KGN57401.1
KGN61513.1
KGN58963.1	K11294	NCL, NSR1	nucleolin	map05130	Pathogenic Escherichia coli infection	http://www.kegg.jp/kegg-bin/show_pathway?map05130+K11294
KGN61439.1	K03283	HSPA1_8	heat shock 70kDa protein 1/8	map03040	Spliceosome	http://www.kegg.jp/kegg-bin/show_pathway?map03040+K03283
KGN61439.1	K03283	HSPA1_8	heat shock 70kDa protein 1/8	map04010	MAPK signaling pathway	http://www.kegg.jp/kegg-bin/show_pathway?map04010+K03283
KGN61439.1	K03283	HSPA1_8	heat shock 70kDa protein 1/8	map04141	Protein processing in endoplasmic reticulum	http://www.kegg.jp/kegg-bin/show_pathway?map04141+K03283
KGN61439.1	K03283	HSPA1_8	heat shock 70kDa protein 1/8	map04144	Endocytosis	http://www.kegg.jp/kegg-bin/show_pathway?map04144+K03283
KGN61439.1	K03283	HSPA1_8	heat shock 70kDa protein 1/8	map04213	Longevity regulating pathway - multiple species	http://www.kegg.jp/kegg-bin/show_pathway?map04213+K03283
KGN61439.1	K03283	HSPA1_8	heat shock 70kDa protein 1/8	map04612	Antigen processing and presentation	http://www.kegg.jp/kegg-bin/show_pathway?map04612+K03283
KGN61439.1	K03283	HSPA1_8	heat shock 70kDa protein 1/8	map04915	Estrogen signaling pathway	http://www.kegg.jp/kegg-bin/show_pathway?map04915+K03283
KGN61439.1	K03283	HSPA1_8	heat shock 70kDa protein 1/8	map05134	Legionellosis	http://www.kegg.jp/kegg-bin/show_pathway?map05134+K03283
KGN61439.1	K03283	HSPA1_8	heat shock 70kDa protein 1/8	map05145	Toxoplasmosis	http://www.kegg.jp/kegg-bin/show_pathway?map05145+K03283
KGN61439.1	K03283	HSPA1_8	heat shock 70kDa protein 1/8	map05162	Measles	http://www.kegg.jp/kegg-bin/show_pathway?map05162+K03283
KGN61439.1	K03283	HSPA1_8	heat shock 70kDa protein 1/8	map05164	Influenza A	http://www.kegg.jp/kegg-bin/show_pathway?map05164+K03283
KGN61439.1	K03283	HSPA1_8	heat shock 70kDa protein 1/8	map05169	Epstein-Barr virus infection	http://www.kegg.jp/kegg-bin/show_pathway?map05169+K03283
XP_004139746.2	K03283	HSPA1_8	heat shock 70kDa protein 1/8	map03040	Spliceosome	http://www.kegg.jp/kegg-bin/show_pathway?map03040+K03283
XP_004139746.2	K03283	HSPA1_8	heat shock 70kDa protein 1/8	map04010	MAPK signaling pathway	http://www.kegg.jp/kegg-bin/show_pathway?map04010+K03283
XP_004139746.2	K03283	HSPA1_8	heat shock 70kDa protein 1/8	map04141	Protein processing in endoplasmic reticulum	http://www.kegg.jp/kegg-bin/show_pathway?map04141+K03283
XP_004139746.2	K03283	HSPA1_8	heat shock 70kDa protein 1/8	map04144	Endocytosis	http://www.kegg.jp/kegg-bin/show_pathway?map04144+K03283
XP_004139746.2	K03283	HSPA1_8	heat shock 70kDa protein 1/8	map04213	Longevity regulating pathway - multiple species	http://www.kegg.jp/kegg-bin/show_pathway?map04213+K03283
XP_004139746.2	K03283	HSPA1_8	heat shock 70kDa protein 1/8	map04612	Antigen processing and presentation	http://www.kegg.jp/kegg-bin/show_pathway?map04612+K03283
XP_004139746.2	K03283	HSPA1_8	heat shock 70kDa protein 1/8	map04915	Estrogen signaling pathway	http://www.kegg.jp/kegg-bin/show_pathway?map04915+K03283
XP_004139746.2	K03283	HSPA1_8	heat shock 70kDa protein 1/8	map05134	Legionellosis	http://www.kegg.jp/kegg-bin/show_pathway?map05134+K03283
XP_004139746.2	K03283	HSPA1_8	heat shock 70kDa protein 1/8	map05145	Toxoplasmosis	http://www.kegg.jp/kegg-bin/show_pathway?map05145+K03283
XP_004139746.2	K03283	HSPA1_8	heat shock 70kDa protein 1/8	map05162	Measles	http://www.kegg.jp/kegg-bin/show_pathway?map05162+K03283
XP_004139746.2	K03283	HSPA1_8	heat shock 70kDa protein 1/8	map05164	Influenza A	http://www.kegg.jp/kegg-bin/show_pathway?map05164+K03283
XP_004139746.2	K03283	HSPA1_8	heat shock 70kDa protein 1/8	map05169	Epstein-Barr virus infection	http://www.kegg.jp/kegg-bin/show_pathway?map05169+K03283
XP_004147619.1	K02945	RP-S1, rpsA	small subunit ribosomal protein S1	map03010	Ribosome	http://www.kegg.jp/kegg-bin/show_pathway?map03010+K02945
KGN57185.1	K02945	RP-S1, rpsA	small subunit ribosomal protein S1	map03010	Ribosome	http://www.kegg.jp/kegg-bin/show_pathway?map03010+K02945
CCF55356.1	K01602	rbcS	ribulose-bisphosphate carboxylase small chain [EC:4.1.1.39;]	map00630	Glyoxylate and dicarboxylate metabolism	http://www.kegg.jp/kegg-bin/show_pathway?map00630+K01602
CCF55356.1	K01602	rbcS	ribulose-bisphosphate carboxylase small chain [EC:4.1.1.39;]	map00710	Carbon fixation in photosynthetic organisms	http://www.kegg.jp/kegg-bin/show_pathway?map00710+K01602
CCF55356.1	K01602	rbcS	ribulose-bisphosphate carboxylase small chain [EC:4.1.1.39;]	map01200	Carbon metabolism	http://www.kegg.jp/kegg-bin/show_pathway?map01200+K01602
KGN43625.1	K06630	YWHAE	14-3-3 protein epsilon	map04011	MAPK signaling pathway - yeast	http://www.kegg.jp/kegg-bin/show_pathway?map04011+K06630
KGN43625.1	K06630	YWHAE	14-3-3 protein epsilon	map04110	Cell cycle	http://www.kegg.jp/kegg-bin/show_pathway?map04110+K06630
KGN43625.1	K06630	YWHAE	14-3-3 protein epsilon	map04114	Oocyte meiosis	http://www.kegg.jp/kegg-bin/show_pathway?map04114+K06630
KGN43625.1	K06630	YWHAE	14-3-3 protein epsilon	map04151	PI3K-Akt signaling pathway	http://www.kegg.jp/kegg-bin/show_pathway?map04151+K06630
KGN43625.1	K06630	YWHAE	14-3-3 protein epsilon	map04390	Hippo signaling pathway	http://www.kegg.jp/kegg-bin/show_pathway?map04390+K06630
KGN43625.1	K06630	YWHAE	14-3-3 protein epsilon	map04391	Hippo signaling pathway - fly	http://www.kegg.jp/kegg-bin/show_pathway?map04391+K06630
KGN43625.1	K06630	YWHAE	14-3-3 protein epsilon	map04722	Neurotrophin signaling pathway	http://www.kegg.jp/kegg-bin/show_pathway?map04722+K06630
KGN43625.1	K06630	YWHAE	14-3-3 protein epsilon	map05169	Epstein-Barr virus infection	http://www.kegg.jp/kegg-bin/show_pathway?map05169+K06630
KGN43625.1	K06630	YWHAE	14-3-3 protein epsilon	map05203	Viral carcinogenesis	http://www.kegg.jp/kegg-bin/show_pathway?map05203+K06630
KGN59544.1
KGN60531.1	K11279	NAP1L1, NRP	nucleosome assembly protein 1-like 1
KGN60068.1	K02638	petE	plastocyanin	map00195	Photosynthesis	http://www.kegg.jp/kegg-bin/show_pathway?map00195+K02638
prf||0911298A	K02638	petE	plastocyanin	map00195	Photosynthesis	http://www.kegg.jp/kegg-bin/show_pathway?map00195+K02638
KGN45737.1
KGN50568.1
CAA47906.1
XP_011656301.1
XP_011656299.1
XP_011656297.1
ABK55669.1
ABO36654.1
XP_004144316.2	K03626	EGD2, NACA	nascent polypeptide-associated complex subunit alpha
XP_004144317.1	K03626	EGD2, NACA	nascent polypeptide-associated complex subunit alpha
KGN54670.1	K03626	EGD2, NACA	nascent polypeptide-associated complex subunit alpha
KGN65908.1	K07375	TUBB	tubulin beta	map04145	Phagosome	http://www.kegg.jp/kegg-bin/show_pathway?map04145+K07375
KGN65908.1	K07375	TUBB	tubulin beta	map04540	Gap junction	http://www.kegg.jp/kegg-bin/show_pathway?map04540+K07375
KGN65908.1	K07375	TUBB	tubulin beta	map05130	Pathogenic Escherichia coli infection	http://www.kegg.jp/kegg-bin/show_pathway?map05130+K07375
KGN62682.1	K07375	TUBB	tubulin beta	map04145	Phagosome	http://www.kegg.jp/kegg-bin/show_pathway?map04145+K07375
KGN62682.1	K07375	TUBB	tubulin beta	map04540	Gap junction	http://www.kegg.jp/kegg-bin/show_pathway?map04540+K07375
KGN62682.1	K07375	TUBB	tubulin beta	map05130	Pathogenic Escherichia coli infection	http://www.kegg.jp/kegg-bin/show_pathway?map05130+K07375
KGN64172.1	K07375	TUBB	tubulin beta	map04145	Phagosome	http://www.kegg.jp/kegg-bin/show_pathway?map04145+K07375
KGN64172.1	K07375	TUBB	tubulin beta	map04540	Gap junction	http://www.kegg.jp/kegg-bin/show_pathway?map04540+K07375
KGN64172.1	K07375	TUBB	tubulin beta	map05130	Pathogenic Escherichia coli infection	http://www.kegg.jp/kegg-bin/show_pathway?map05130+K07375
KGN58809.1	K07375	TUBB	tubulin beta	map04145	Phagosome	http://www.kegg.jp/kegg-bin/show_pathway?map04145+K07375
KGN58809.1	K07375	TUBB	tubulin beta	map04540	Gap junction	http://www.kegg.jp/kegg-bin/show_pathway?map04540+K07375
KGN58809.1	K07375	TUBB	tubulin beta	map05130	Pathogenic Escherichia coli infection	http://www.kegg.jp/kegg-bin/show_pathway?map05130+K07375
KGN54346.1	K07375	TUBB	tubulin beta	map04145	Phagosome	http://www.kegg.jp/kegg-bin/show_pathway?map04145+K07375
KGN54346.1	K07375	TUBB	tubulin beta	map04540	Gap junction	http://www.kegg.jp/kegg-bin/show_pathway?map04540+K07375
KGN54346.1	K07375	TUBB	tubulin beta	map05130	Pathogenic Escherichia coli infection	http://www.kegg.jp/kegg-bin/show_pathway?map05130+K07375
KGN59749.1	K07374	TUBA	tubulin alpha	map04145	Phagosome	http://www.kegg.jp/kegg-bin/show_pathway?map04145+K07374
KGN59749.1	K07374	TUBA	tubulin alpha	map04210	Apoptosis	http://www.kegg.jp/kegg-bin/show_pathway?map04210+K07374
KGN59749.1	K07374	TUBA	tubulin alpha	map04530	Tight junction	http://www.kegg.jp/kegg-bin/show_pathway?map04530+K07374
KGN59749.1	K07374	TUBA	tubulin alpha	map04540	Gap junction	http://www.kegg.jp/kegg-bin/show_pathway?map04540+K07374
KGN59749.1	K07374	TUBA	tubulin alpha	map05130	Pathogenic Escherichia coli infection	http://www.kegg.jp/kegg-bin/show_pathway?map05130+K07374
KGN54025.1	K07374	TUBA	tubulin alpha	map04145	Phagosome	http://www.kegg.jp/kegg-bin/show_pathway?map04145+K07374
KGN54025.1	K07374	TUBA	tubulin alpha	map04210	Apoptosis	http://www.kegg.jp/kegg-bin/show_pathway?map04210+K07374
KGN54025.1	K07374	TUBA	tubulin alpha	map04530	Tight junction	http://www.kegg.jp/kegg-bin/show_pathway?map04530+K07374
KGN54025.1	K07374	TUBA	tubulin alpha	map04540	Gap junction	http://www.kegg.jp/kegg-bin/show_pathway?map04540+K07374
KGN54025.1	K07374	TUBA	tubulin alpha	map05130	Pathogenic Escherichia coli infection	http://www.kegg.jp/kegg-bin/show_pathway?map05130+K07374
KGN58559.1
ABN41481.1
XP_011656300.1
ACS29559.1
KGN47715.1	K09580	PDIA1, P4HB	protein disulfide-isomerase A1 [EC:5.3.4.1;]	map04141	Protein processing in endoplasmic reticulum	http://www.kegg.jp/kegg-bin/show_pathway?map04141+K09580

## Sheet: map2query
Map_ID	Map_Name	Seqs	Seqs_Num	URL
map04011	MAPK signaling pathway - yeast	KGN43625.1	1	http://www.kegg.jp/kegg-bin/show_pathway?map04011+K06630
map04727	GABAergic synapse	KGN57792.1	1	http://www.kegg.jp/kegg-bin/show_pathway?map04727+K01915
map04010	MAPK signaling pathway	KGN61439.1 XP_004139746.2	2	http://www.kegg.jp/kegg-bin/show_pathway?map04010+K03283+K03283
map00030	Pentose phosphate pathway	KGN56609.1 KGN46249.1	2	http://www.kegg.jp/kegg-bin/show_pathway?map00030+K00615+K00615
map00480	Glutathione metabolism	KGN65655.1 ACO90193.1 ADT80721.1	3	http://www.kegg.jp/kegg-bin/show_pathway?map00480+K00434+K00434+K00434
map04391	Hippo signaling pathway - fly	KGN43625.1	1	http://www.kegg.jp/kegg-bin/show_pathway?map04391+K06630
map04612	Antigen processing and presentation	KGN61439.1 XP_004139746.2	2	http://www.kegg.jp/kegg-bin/show_pathway?map04612+K03283+K03283
map00190	Oxidative phosphorylation	AAZ94637.1 YP_247584.1 CAJ00765.1 AAZ94658.1 AAK72752.1 KGN43793.1	6	http://www.kegg.jp/kegg-bin/show_pathway?map00190+K02111+K02111+K02112+K02112+K02112+K01507
map01200	Carbon metabolism	KGN52085.1 AAA33131.1 KGN54918.1 KGN61895.1 KGN50632.1 KGN56609.1 KGN46249.1 KGN48214.1 KGN66170.1 CCF55356.1	10	http://www.kegg.jp/kegg-bin/show_pathway?map01200+K01602+K01602+K01803+K01803+K01100+K00615+K00615+K01754+K00029+K01602
map04915	Estrogen signaling pathway	KGN61439.1 XP_004139746.2	2	http://www.kegg.jp/kegg-bin/show_pathway?map04915+K03283+K03283
map01051	Biosynthesis of ansamycins	KGN56609.1 KGN46249.1	2	http://www.kegg.jp/kegg-bin/show_pathway?map01051+K00615+K00615
map05203	Viral carcinogenesis	KGN43625.1	1	http://www.kegg.jp/kegg-bin/show_pathway?map05203+K06630
map04141	Protein processing in endoplasmic reticulum	KGN61439.1 XP_004139746.2 KGN47715.1	3	http://www.kegg.jp/kegg-bin/show_pathway?map04141+K03283+K03283+K09580
map04530	Tight junction	KGN59749.1 KGN54025.1	2	http://www.kegg.jp/kegg-bin/show_pathway?map04530+K07374+K07374
map00290	Valine, leucine and isoleucine biosynthesis	KGN48214.1	1	http://www.kegg.jp/kegg-bin/show_pathway?map00290+K01754
map03050	Proteasome	KGN66053.1 XP_011648845.1 KGN60962.1 KGN62618.1	4	http://www.kegg.jp/kegg-bin/show_pathway?map03050+K03065+K03065+K03065+K02725
map05134	Legionellosis	KGN61439.1 XP_004139746.2	2	http://www.kegg.jp/kegg-bin/show_pathway?map05134+K03283+K03283
map03010	Ribosome	KGN56349.1 XP_004147619.1 KGN57185.1	3	http://www.kegg.jp/kegg-bin/show_pathway?map03010+K02942+K02945+K02945
map04145	Phagosome	KGN65908.1 KGN62682.1 KGN64172.1 KGN58809.1 KGN54346.1 KGN59749.1 KGN54025.1	7	http://www.kegg.jp/kegg-bin/show_pathway?map04145+K07375+K07375+K07375+K07375+K07375+K07374+K07374
map04722	Neurotrophin signaling pathway	KGN43625.1	1	http://www.kegg.jp/kegg-bin/show_pathway?map04722+K06630
map01230	Biosynthesis of amino acids	KGN57792.1 KGN54918.1 KGN61895.1 KGN56609.1 KGN46249.1 KGN48214.1	6	http://www.kegg.jp/kegg-bin/show_pathway?map01230+K01915+K01803+K01803+K00615+K00615+K01754
map05169	Epstein-Barr virus infection	KGN66053.1 XP_011648845.1 KGN60962.1 KGN61439.1 XP_004139746.2 KGN43625.1	6	http://www.kegg.jp/kegg-bin/show_pathway?map05169+K03065+K03065+K03065+K03283+K03283+K06630
map05164	Influenza A	KGN61439.1 XP_004139746.2	2	http://www.kegg.jp/kegg-bin/show_pathway?map05164+K03283+K03283
map00860	Porphyrin and chlorophyll metabolism	KGN49283.1	1	http://www.kegg.jp/kegg-bin/show_pathway?map00860+K03405
map00260	Glycine, serine and threonine metabolism	KGN48214.1	1	http://www.kegg.jp/kegg-bin/show_pathway?map00260+K01754
map04144	Endocytosis	KGN61439.1 XP_004139746.2	2	http://www.kegg.jp/kegg-bin/show_pathway?map04144+K03283+K03283
map04724	Glutamatergic synapse	KGN57792.1	1	http://www.kegg.jp/kegg-bin/show_pathway?map04724+K01915
map04142	Lysosome	KGN62647.1	1	http://www.kegg.jp/kegg-bin/show_pathway?map04142+K01373
map04540	Gap junction	KGN65908.1 KGN62682.1 KGN64172.1 KGN58809.1 KGN54346.1 KGN59749.1 KGN54025.1	7	http://www.kegg.jp/kegg-bin/show_pathway?map04540+K07375+K07375+K07375+K07375+K07375+K07374+K07374
map00910	Nitrogen metabolism	KGN57792.1	1	http://www.kegg.jp/kegg-bin/show_pathway?map00910+K01915
map00053	Ascorbate and aldarate metabolism	KGN65655.1 ACO90193.1 ADT80721.1	3	http://www.kegg.jp/kegg-bin/show_pathway?map00053+K00434+K00434+K00434
map00630	Glyoxylate and dicarboxylate metabolism	KGN57792.1 KGN52085.1 AAA33131.1 CCF55356.1	4	http://www.kegg.jp/kegg-bin/show_pathway?map00630+K01915+K01602+K01602+K01602
map00195	Photosynthesis	KGN48464.1 KGN43571.1 AAZ94637.1 YP_247584.1 CAJ00765.1 AAZ94658.1 AAK72752.1 AAZ94668.1 KGN60068.1 prf||0911298A	10	http://www.kegg.jp/kegg-bin/show_pathway?map00195+K02716+K02636+K02111+K02111+K02112+K02112+K02112+K02707+K02638+K02638
map04114	Oocyte meiosis	KGN43625.1	1	http://www.kegg.jp/kegg-bin/show_pathway?map04114+K06630
map04151	PI3K-Akt signaling pathway	KGN43625.1	1	http://www.kegg.jp/kegg-bin/show_pathway?map04151+K06630
map00710	Carbon fixation in photosynthetic organisms	KGN52085.1 AAA33131.1 KGN54918.1 KGN61895.1 KGN50632.1 KGN56609.1 KGN46249.1 KGN66170.1 CCF55356.1	9	http://www.kegg.jp/kegg-bin/show_pathway?map00710+K01602+K01602+K01803+K01803+K01100+K00615+K00615+K00029+K01602
map03040	Spliceosome	KGN61439.1 XP_004139746.2	2	http://www.kegg.jp/kegg-bin/show_pathway?map03040+K03283+K03283
map00562	Inositol phosphate metabolism	KGN54918.1 KGN61895.1	2	http://www.kegg.jp/kegg-bin/show_pathway?map00562+K01803+K01803
map00196	Photosynthesis - antenna proteins	KGN51208.1	1	http://www.kegg.jp/kegg-bin/show_pathway?map00196+K08907
map00620	Pyruvate metabolism	KGN66170.1	1	http://www.kegg.jp/kegg-bin/show_pathway?map00620+K00029
map04213	Longevity regulating pathway - multiple species	KGN61439.1 XP_004139746.2	2	http://www.kegg.jp/kegg-bin/show_pathway?map04213+K03283+K03283
map00220	Arginine biosynthesis	KGN57792.1	1	http://www.kegg.jp/kegg-bin/show_pathway?map00220+K01915
map00051	Fructose and mannose metabolism	KGN54918.1 KGN61895.1	2	http://www.kegg.jp/kegg-bin/show_pathway?map00051+K01803+K01803
map00250	Alanine, aspartate and glutamate metabolism	KGN57792.1	1	http://www.kegg.jp/kegg-bin/show_pathway?map00250+K01915
map04210	Apoptosis	KGN62647.1 KGN59749.1 KGN54025.1	3	http://www.kegg.jp/kegg-bin/show_pathway?map04210+K01373+K07374+K07374
map02020	Two-component system	KGN57792.1	1	http://www.kegg.jp/kegg-bin/show_pathway?map02020+K01915
map04390	Hippo signaling pathway	KGN43625.1	1	http://www.kegg.jp/kegg-bin/show_pathway?map04390+K06630
map05130	Pathogenic Escherichia coli infection	KGN58963.1 KGN65908.1 KGN62682.1 KGN64172.1 KGN58809.1 KGN54346.1 KGN59749.1 KGN54025.1	8	http://www.kegg.jp/kegg-bin/show_pathway?map05130+K11294+K07375+K07375+K07375+K07375+K07375+K07374+K07374
map05162	Measles	KGN61439.1 XP_004139746.2	2	http://www.kegg.jp/kegg-bin/show_pathway?map05162+K03283+K03283
map00010	Glycolysis / Gluconeogenesis	KGN54918.1 KGN61895.1	2	http://www.kegg.jp/kegg-bin/show_pathway?map00010+K01803+K01803
map04110	Cell cycle	KGN43625.1	1	http://www.kegg.jp/kegg-bin/show_pathway?map04110+K06630
map05145	Toxoplasmosis	KGN61439.1 XP_004139746.2	2	http://www.kegg.jp/kegg-bin/show_pathway?map05145+K03283+K03283

## Sheet: TopMapStat
Map_ID	Map_Name	Seqs	Seqs_Num	URL
map01200	Carbon metabolism	KGN52085.1 AAA33131.1 KGN54918.1 KGN61895.1 KGN50632.1 KGN56609.1 KGN46249.1 KGN48214.1 KGN66170.1 CCF55356.1	10	http://www.kegg.jp/kegg-bin/show_pathway?map01200+K01602+K01602+K01803+K01803+K01100+K00615+K00615+K01754+K00029+K01602
map00195	Photosynthesis	KGN48464.1 KGN43571.1 AAZ94637.1 YP_247584.1 CAJ00765.1 AAZ94658.1 AAK72752.1 AAZ94668.1 KGN60068.1 prf||0911298A	10	http://www.kegg.jp/kegg-bin/show_pathway?map00195+K02716+K02636+K02111+K02111+K02112+K02112+K02112+K02707+K02638+K02638
map00710	Carbon fixation in photosynthetic organisms	KGN52085.1 AAA33131.1 KGN54918.1 KGN61895.1 KGN50632.1 KGN56609.1 KGN46249.1 KGN66170.1 CCF55356.1	9	http://www.kegg.jp/kegg-bin/show_pathway?map00710+K01602+K01602+K01803+K01803+K01100+K00615+K00615+K00029+K01602
map05130	Pathogenic Escherichia coli infection	KGN58963.1 KGN65908.1 KGN62682.1 KGN64172.1 KGN58809.1 KGN54346.1 KGN59749.1 KGN54025.1	8	http://www.kegg.jp/kegg-bin/show_pathway?map05130+K11294+K07375+K07375+K07375+K07375+K07375+K07374+K07374
map04145	Phagosome	KGN65908.1 KGN62682.1 KGN64172.1 KGN58809.1 KGN54346.1 KGN59749.1 KGN54025.1	7	http://www.kegg.jp/kegg-bin/show_pathway?map04145+K07375+K07375+K07375+K07375+K07375+K07374+K07374
map04540	Gap junction	KGN65908.1 KGN62682.1 KGN64172.1 KGN58809.1 KGN54346.1 KGN59749.1 KGN54025.1	7	http://www.kegg.jp/kegg-bin/show_pathway?map04540+K07375+K07375+K07375+K07375+K07375+K07374+K07374
map00190	Oxidative phosphorylation	AAZ94637.1 YP_247584.1 CAJ00765.1 AAZ94658.1 AAK72752.1 KGN43793.1	6	http://www.kegg.jp/kegg-bin/show_pathway?map00190+K02111+K02111+K02112+K02112+K02112+K01507
map01230	Biosynthesis of amino acids	KGN57792.1 KGN54918.1 KGN61895.1 KGN56609.1 KGN46249.1 KGN48214.1	6	http://www.kegg.jp/kegg-bin/show_pathway?map01230+K01915+K01803+K01803+K00615+K00615+K01754
map05169	Epstein-Barr virus infection	KGN66053.1 XP_011648845.1 KGN60962.1 KGN61439.1 XP_004139746.2 KGN43625.1	6	http://www.kegg.jp/kegg-bin/show_pathway?map05169+K03065+K03065+K03065+K03283+K03283+K06630
map03050	Proteasome	KGN66053.1 XP_011648845.1 KGN60962.1 KGN62618.1	4	http://www.kegg.jp/kegg-bin/show_pathway?map03050+K03065+K03065+K03065+K02725
map00630	Glyoxylate and dicarboxylate metabolism	KGN57792.1 KGN52085.1 AAA33131.1 CCF55356.1	4	http://www.kegg.jp/kegg-bin/show_pathway?map00630+K01915+K01602+K01602+K01602
map00480	Glutathione metabolism	KGN65655.1 ACO90193.1 ADT80721.1	3	http://www.kegg.jp/kegg-bin/show_pathway?map00480+K00434+K00434+K00434
map04141	Protein processing in endoplasmic reticulum	KGN61439.1 XP_004139746.2 KGN47715.1	3	http://www.kegg.jp/kegg-bin/show_pathway?map04141+K03283+K03283+K09580
map03010	Ribosome	KGN56349.1 XP_004147619.1 KGN57185.1	3	http://www.kegg.jp/kegg-bin/show_pathway?map03010+K02942+K02945+K02945
map00053	Ascorbate and aldarate metabolism	KGN65655.1 ACO90193.1 ADT80721.1	3	http://www.kegg.jp/kegg-bin/show_pathway?map00053+K00434+K00434+K00434
map04210	Apoptosis	KGN62647.1 KGN59749.1 KGN54025.1	3	http://www.kegg.jp/kegg-bin/show_pathway?map04210+K01373+K07374+K07374
map04010	MAPK signaling pathway	KGN61439.1 XP_004139746.2	2	http://www.kegg.jp/kegg-bin/show_pathway?map04010+K03283+K03283
map00030	Pentose phosphate pathway	KGN56609.1 KGN46249.1	2	http://www.kegg.jp/kegg-bin/show_pathway?map00030+K00615+K00615
map04612	Antigen processing and presentation	KGN61439.1 XP_004139746.2	2	http://www.kegg.jp/kegg-bin/show_pathway?map04612+K03283+K03283
map04915	Estrogen signaling pathway	KGN61439.1 XP_004139746.2	2	http://www.kegg.jp/kegg-bin/show_pathway?map04915+K03283+K03283
map01051	Biosynthesis of ansamycins	KGN56609.1 KGN46249.1	2	http://www.kegg.jp/kegg-bin/show_pathway?map01051+K00615+K00615
map04530	Tight junction	KGN59749.1 KGN54025.1	2	http://www.kegg.jp/kegg-bin/show_pathway?map04530+K07374+K07374
map05134	Legionellosis	KGN61439.1 XP_004139746.2	2	http://www.kegg.jp/kegg-bin/show_pathway?map05134+K03283+K03283
map05164	Influenza A	KGN61439.1 XP_004139746.2	2	http://www.kegg.jp/kegg-bin/show_pathway?map05164+K03283+K03283
map04144	Endocytosis	KGN61439.1 XP_004139746.2	2	http://www.kegg.jp/kegg-bin/show_pathway?map04144+K03283+K03283
map03040	Spliceosome	KGN61439.1 XP_004139746.2	2	http://www.kegg.jp/kegg-bin/show_pathway?map03040+K03283+K03283
map00562	Inositol phosphate metabolism	KGN54918.1 KGN61895.1	2	http://www.kegg.jp/kegg-bin/show_pathway?map00562+K01803+K01803
map04213	Longevity regulating pathway - multiple species	KGN61439.1 XP_004139746.2	2	http://www.kegg.jp/kegg-bin/show_pathway?map04213+K03283+K03283
map00051	Fructose and mannose metabolism	KGN54918.1 KGN61895.1	2	http://www.kegg.jp/kegg-bin/show_pathway?map00051+K01803+K01803
map05162	Measles	KGN61439.1 XP_004139746.2	2	http://www.kegg.jp/kegg-bin/show_pathway?map05162+K03283+K03283
map00010	Glycolysis / Gluconeogenesis	KGN54918.1 KGN61895.1	2	http://www.kegg.jp/kegg-bin/show_pathway?map00010+K01803+K01803
map05145	Toxoplasmosis	KGN61439.1 XP_004139746.2	2	http://www.kegg.jp/kegg-bin/show_pathway?map05145+K03283+K03283
map04011	MAPK signaling pathway - yeast	KGN43625.1	1	http://www.kegg.jp/kegg-bin/show_pathway?map04011+K06630
map04727	GABAergic synapse	KGN57792.1	1	http://www.kegg.jp/kegg-bin/show_pathway?map04727+K01915
map04391	Hippo signaling pathway - fly	KGN43625.1	1	http://www.kegg.jp/kegg-bin/show_pathway?map04391+K06630
map05203	Viral carcinogenesis	KGN43625.1	1	http://www.kegg.jp/kegg-bin/show_pathway?map05203+K06630
map00290	Valine, leucine and isoleucine biosynthesis	KGN48214.1	1	http://www.kegg.jp/kegg-bin/show_pathway?map00290+K01754
map04722	Neurotrophin signaling pathway	KGN43625.1	1	http://www.kegg.jp/kegg-bin/show_pathway?map04722+K06630
map00860	Porphyrin and chlorophyll metabolism	KGN49283.1	1	http://www.kegg.jp/kegg-bin/show_pathway?map00860+K03405
map00260	Glycine, serine and threonine metabolism	KGN48214.1	1	http://www.kegg.jp/kegg-bin/show_pathway?map00260+K01754
map04724	Glutamatergic synapse	KGN57792.1	1	http://www.kegg.jp/kegg-bin/show_pathway?map04724+K01915
map04142	Lysosome	KGN62647.1	1	http://www.kegg.jp/kegg-bin/show_pathway?map04142+K01373
map00910	Nitrogen metabolism	KGN57792.1	1	http://www.kegg.jp/kegg-bin/show_pathway?map00910+K01915
map04114	Oocyte meiosis	KGN43625.1	1	http://www.kegg.jp/kegg-bin/show_pathway?map04114+K06630
map04151	PI3K-Akt signaling pathway	KGN43625.1	1	http://www.kegg.jp/kegg-bin/show_pathway?map04151+K06630
map00196	Photosynthesis - antenna proteins	KGN51208.1	1	http://www.kegg.jp/kegg-bin/show_pathway?map00196+K08907
map00620	Pyruvate metabolism	KGN66170.1	1	http://www.kegg.jp/kegg-bin/show_pathway?map00620+K00029
map00220	Arginine biosynthesis	KGN57792.1	1	http://www.kegg.jp/kegg-bin/show_pathway?map00220+K01915
map00250	Alanine, aspartate and glutamate metabolism	KGN57792.1	1	http://www.kegg.jp/kegg-bin/show_pathway?map00250+K01915
map02020	Two-component system	KGN57792.1	1	http://www.kegg.jp/kegg-bin/show_pathway?map02020+K01915
map04390	Hippo signaling pathway	KGN43625.1	1	http://www.kegg.jp/kegg-bin/show_pathway?map04390+K06630
map04110	Cell cycle	KGN43625.1	1	http://www.kegg.jp/kegg-bin/show_pathway?map04110+K06630
