# Supplementary material for: The role and proteomic analysis of ethylene in hydrogen gas-induced adventitious rooting development in cucumber (Cucumis sativus L.) explants
Source: PeerJ. 2020 Apr 7;8:e8896. doi: 10.7717/peerj.8896 (PMC7147439; doi:10.7717/peerj.8896)
Supplement: Supplemental Information 8 [file peerj-08-8896-s014.xlt]

## Sheet: Sheet1
Analysis Information
	Report Type			Protein-Peptide Summary by Spot						Analysis Type			Combined (MS+MS/MS)
	Sample Set Name			Sample project20170120						Database			NCBI_cucumis_sat
	Analysis Name			R17064-3						Creation Date			02/24/2017 18:25:07
	Reported By			02/27/2017 13:15:33 - admin						Last Modified			02/24/2017 18:28:48
		MS Acq. : Proc. Methods				(Unspecified) : (Unspecified)
		Interpretation Method				(Unspecified)
Gel Idx/Pos			256/K8						Instr./Gel Origin		BA2151/Sample Project 20170120					Process Status			Analysis Succeeded
Plate [#] Name			[1] Sample Project 20170120						Instrument Sample Name							Spectra			11
Rank		Protein Name						Species				Accession No.		Protein MW		Protein	Pep.	Protein	Protein	Total Ion	Total Ion
																PI	Count	Score	Score	Score	C. I. %
																			C. I. %
	1	PREDICTED: DNA ligase 4 isoform X4 [Cucumis										XP_011648962.1		119144	8.55		21	44	0
		sativus]
		Peptide Information
		Calc. Mass		Obsrv. Mass	± da	± ppm	Start	End	Sequence			Ion	C. I. %	Modification					Rank	Result Type
							Seq.	Seq.				Score
		800.394		800.353	-0.0406	-51	625	630	AIDYYR											Mascot
		813.48		813.445	-0.0353	-43	814	820	RGRPATR											Mascot
		819.384		819.377	-0.0069	-8	946	952	GKDENEK											Mascot
		832.416		832.338	-0.0783	-94	827	833	SDVEQVR											Mascot
		834.403		834.363	-0.0391	-47	86	92	EVVAECK					Carbamidomethyl (C)[6]						Mascot
		837.341		837.4	0.0593	71	710	716	SCNEAEK					Carbamidomethyl (C)[2]						Mascot
		858.45		858.487	0.0371	43	717	723	HAMLKDK					Oxidation (M)[3]						Mascot
		923.396		923.316	-0.0798	-86	958	965	MLEDCNAK											Mascot
		985.51		985.493	-0.0173	-18	625	632	AIDYYRGK											Mascot
		1491.71		1491.73	0.0177	12	742	754	LQEDSYNLNPNGK											Mascot
		1838.91		1838.89	-0.0215	-12	149	164	SLNRFAEFGSNQEIAR											Mascot
		1940.98		1940.89	-0.0926	-48	286	304	AGSDLDALIIGGYYGSGR											Mascot
									R
		1964.96		1964.91	-0.0447	-23	137	152	CILDGEMLVWDKSLNR					Carbamidomethyl (C)[1], Oxidation (M)[7]						Mascot
		2117.95		2118.02	0.0637	30	553	569	HGDVIHYSWVLECCSQK					Carbamidomethyl (C)[13,14]						Mascot
		2224.99		2225.08	0.0947	43	793	812	NEAASGQQMLSHSTERY					Oxidation (M)[9]						Mascot
									DGK
Project 1\Sample project20170120\R17064-3																				1	of	108
		2233.04		2233.08	0.0403	18	637	653	QDWCMFVGCQIYFLPLR					Carbamidomethyl (C)[4,9]						Mascot
		2417.13		2417.19	0.0571	24	113	133	NFLDHSEYGHGMSDVIV											Mascot
									QNVR
		2464.31		2464.23	-0.081	-33	334	355	VGTGLTDEELDAVVNKLK											Mascot
									PYFR
		2477.14		2477.11	-0.0337	-14	20	40	SIFHEFHPDAEDLFNVTC											Mascot
									DLK
		2690.29		2690.27	-0.0144	-5	212	236	GQLEVLVPNDGLNSDCA											Mascot
									GYPSWSIR
		3175.49		3175.57	0.0757	24	421	447	YDKPWHECLDVQSFVEL											Mascot
									VHSSNGTTQR
	2	hypothetical protein Csa_2G061570 [Cucumis sativus]										KGN61178.1		136734	8.79		23	40	0
		Protein Group
		PREDICTED: DNA ligase 4 isoform X1 [Cucumis										XP_011648959.1		136805		8.7899
		sativus]														999618
																5303
		PREDICTED: DNA ligase 4 isoform X2 [Cucumis										XP_011648960.1		136734		8.7899
		sativus]														999618
																5303
		Peptide Information
		Calc. Mass		Obsrv. Mass	± da	± ppm	Start	End	Sequence			Ion	C. I. %	Modification					Rank	Result Type
							Seq.	Seq.				Score
		800.394		800.353	-0.0406	-51	784	789	AIDYYR											Mascot
		813.48		813.445	-0.0353	-43	973	979	RGRPATR											Mascot
		819.384		819.377	-0.0069	-8	1105	1111	GKDENEK											Mascot
		832.416		832.338	-0.0783	-94	986	992	SDVEQVR											Mascot
		834.403		834.363	-0.0391	-47	246	252	EVVAECK					Carbamidomethyl (C)[6]						Mascot
		837.377		837.4	0.0229	27	156	162	TNAQEMK					Oxidation (M)[6]						Mascot
		858.45		858.487	0.0371	43	876	882	HAMLKDK					Oxidation (M)[3]						Mascot
		923.396		923.316	-0.0798	-86	1117	1124	MLEDCNAK											Mascot
		985.51		985.493	-0.0173	-18	784	791	AIDYYRGK											Mascot
		1074.55		1074.57	0.0143	13	136	145	LASGENRAEK											Mascot
		1491.71		1491.73	0.0177	12	901	913	LQEDSYNLNPNGK											Mascot
		1796.97		1796.9	-0.07	-39	7	21	FAVLSSLFDWIQRSK											Mascot
		1838.91		1838.89	-0.0215	-12	309	324	SLNRFAEFGSNQEIAR											Mascot
		1940.98		1940.89	-0.0926	-48	446	464	AGSDLDALIIGGYYGSGR											Mascot
									R
		1964.96		1964.91	-0.0447	-23	297	312	CILDGEMLVWDKSLNR					Carbamidomethyl (C)[1], Oxidation (M)[7]						Mascot
		2117.95		2118.02	0.0637	30	712	728	HGDVIHYSWVLECCSQK					Carbamidomethyl (C)[13,14]						Mascot
		2224.99		2225.08	0.0947	43	952	971	NEAASGQQMLSHSTERY					Oxidation (M)[9]						Mascot
									DGK
		2233.04		2233.08	0.0403	18	796	812	QDWCMFVGCQIYFLPLR					Carbamidomethyl (C)[4,9]						Mascot
		2417.13		2417.19	0.0571	24	273	293	NFLDHSEYGHGMSDVIV											Mascot
									QNVR
Project 1\Sample project20170120\R17064-3																				2	of	108
		2464.31		2464.23	-0.081	-33	494	515	VGTGLTDEELDAVVNKLK											Mascot
									PYFR
		2477.14		2477.11	-0.0337	-14	180	200	SIFHEFHPDAEDLFNVTC											Mascot
									DLK
		2690.29		2690.27	-0.0144	-5	372	396	GQLEVLVPNDGLNSDCA											Mascot
									GYPSWSIR
		3175.49		3175.57	0.0757	24	581	607	YDKPWHECLDVQSFVEL											Mascot
									VHSSNGTTQR
	3	PREDICTED: DNA ligase 4 isoform X3 [Cucumis										XP_011648961.1		129113	8.67		22	38	0
		sativus]
		Peptide Information
		Calc. Mass		Obsrv. Mass	± da	± ppm	Start	End	Sequence			Ion	C. I. %	Modification					Rank	Result Type
							Seq.	Seq.				Score
		800.394		800.353	-0.0406	-51	716	721	AIDYYR											Mascot
		813.48		813.445	-0.0353	-43	905	911	RGRPATR											Mascot
		819.384		819.377	-0.0069	-8	1037	1043	GKDENEK											Mascot
		832.416		832.338	-0.0783	-94	918	924	SDVEQVR											Mascot
		834.403		834.363	-0.0391	-47	177	183	EVVAECK					Carbamidomethyl (C)[6]						Mascot
		837.377		837.4	0.0229	27	87	93	TNAQEMK					Oxidation (M)[6]						Mascot
		858.45		858.487	0.0371	43	808	814	HAMLKDK					Oxidation (M)[3]						Mascot
		923.396		923.316	-0.0798	-86	1049	1056	MLEDCNAK											Mascot
		985.51		985.493	-0.0173	-18	716	723	AIDYYRGK											Mascot
		1074.55		1074.57	0.0143	13	67	76	LASGENRAEK											Mascot
		1491.71		1491.73	0.0177	12	833	845	LQEDSYNLNPNGK											Mascot
		1838.91		1838.89	-0.0215	-12	240	255	SLNRFAEFGSNQEIAR											Mascot
		1940.98		1940.89	-0.0926	-48	377	395	AGSDLDALIIGGYYGSGR											Mascot
									R
		1964.96		1964.91	-0.0447	-23	228	243	CILDGEMLVWDKSLNR					Carbamidomethyl (C)[1], Oxidation (M)[7]						Mascot
		2117.95		2118.02	0.0637	30	644	660	HGDVIHYSWVLECCSQK					Carbamidomethyl (C)[13,14]						Mascot
		2224.99		2225.08	0.0947	43	884	903	NEAASGQQMLSHSTERY					Oxidation (M)[9]						Mascot
									DGK
		2233.04		2233.08	0.0403	18	728	744	QDWCMFVGCQIYFLPLR					Carbamidomethyl (C)[4,9]						Mascot
		2417.13		2417.19	0.0571	24	204	224	NFLDHSEYGHGMSDVIV											Mascot
									QNVR
		2464.31		2464.23	-0.081	-33	425	446	VGTGLTDEELDAVVNKLK											Mascot
									PYFR
		2477.14		2477.11	-0.0337	-14	111	131	SIFHEFHPDAEDLFNVTC											Mascot
									DLK
		2690.29		2690.27	-0.0144	-5	303	327	GQLEVLVPNDGLNSDCA											Mascot
									GYPSWSIR
		3175.49		3175.57	0.0757	24	512	538	YDKPWHECLDVQSFVEL											Mascot
									VHSSNGTTQR
	4	PREDICTED: tubulin-folding cofactor B [Cucumis										XP_004142648.1		27659.5	4.83		8	34	0
		sativus]
Project 1\Sample project20170120\R17064-3																				3	of	108
		Peptide Information
		Calc. Mass		Obsrv. Mass	± da	± ppm	Start	End	Sequence			Ion	C. I. %	Modification					Rank	Result Type
							Seq.	Seq.				Score
		811.394		811.38	-0.0143	-18	25	31	SFTSDVR											Mascot
		831.457		831.45	-0.0069	-8	11	17	DESVLLR											Mascot
		834.41		834.363	-0.047	-56	229	235	VGNYPER											Mascot
		1699.77		1699.82	0.053	31	147	160	ISDNYMEELCANIK					Carbamidomethyl (C)[10]						Mascot
		2266.96		2267.08	0.1189	52	48	67	KCGTSVNSMCLELYDDS					Carbamidomethyl (C)[2,10], Oxidation (M)[9]						Mascot
									GSK
		2477.19		2477.11	-0.0747	-30	208	228	GIHYFDCSPFHGAMVRP					Carbamidomethyl (C)[7], Oxidation (M)[14]						Mascot
									DKVK
		2807.3		2807.3	-0.0064	-2	202	226	NDGTVKGIHYFDCSPFH					Oxidation (M)[20]						Mascot
									GAMVRPDK
		2902.36		2902.33	-0.031	-11	135	160	LASQNPSAFESKISDNYM											Mascot
									EELCANIK
	5	hypothetical protein Csa_1G144320 [Cucumis sativus]										KGN64879.1		14777.7	9.82		6	33	0
		Peptide Information
		Calc. Mass		Obsrv. Mass	± da	± ppm	Start	End	Sequence			Ion	C. I. %	Modification					Rank	Result Type
							Seq.	Seq.				Score
		813.483		813.445	-0.0379	-47	61	67	LVPELSR											Mascot
		953.43		953.369	-0.0605	-63	21	27	MNPSYWR											Mascot
		1479.74		1479.79	0.0512	35	28	39	YDMVKSRPSPQR					Oxidation (M)[3]						Mascot
		1796.99		1796.9	-0.0872	-49	45	60	VVQDTEGPSRIVDIIR											Mascot
		2150.1		2150.04	-0.0647	-30	2	20	AQYASLVHTSLLNYGFTH											Mascot
									K
		2807.47		2807.3	-0.1697	-60	100	124	VTFPIALLNNFKMGFTCG											Mascot
									LFIDAFK
		2823.46		2823.26	-0.2046	-72	100	124	VTFPIALLNNFKMGFTCG					Oxidation (M)[13]						Mascot
									LFIDAFK
	6	hypothetical protein Csa_4G006430 [Cucumis sativus]										KGN52936.1		54990.9	9.2		13	33	0
		Protein Group
		PREDICTED: signal recognition particle 54 kDa protein										XP_004152178.1		54990.9		9.1999
		2 [Cucumis sativus]														998092
																6514
		Peptide Information
		Calc. Mass		Obsrv. Mass	± da	± ppm	Start	End	Sequence			Ion	C. I. %	Modification					Rank	Result Type
							Seq.	Seq.				Score
		819.421		819.377	-0.0433	-53	366	372	EKESQAK											Mascot
		831.509		831.45	-0.0586	-70	425	431	LAKVWSK											Mascot
		849.413		849.39	-0.0234	-28	51	57	DMQTNIK											Mascot
		850.409		850.394	-0.015	-18	441	448	GEMSALSR											Mascot
Project 1\Sample project20170120\R17064-3																				4	of	108
		866.404		866.372	-0.0321	-37	441	448	GEMSALSR					Oxidation (M)[3]						Mascot
		1488.73		1488.71	-0.0143	-10	195	206	HKQEAALFEEMR											Mascot
		1838.72		1838.89	0.1752	95	479	495	QMGSNKDMMGMFGGG					Oxidation (M)[2,8,9]						Mascot
									DK
		1939.84		1939.94	0.0941	49	441	457	GEMSALSRNMNAQHMS					Oxidation (M)[3,10,15]						Mascot
									K
		1964.97		1964.91	-0.0592	-30	466	484	QIGGMGGLQSLMKQMG											Mascot
									SNK
		2045.04		2045	-0.04	-20	101	120	TSVVMFVGLQGSGKTTT											Mascot
									CTK
		2102.06		2102.01	-0.0477	-23	101	120	TSVVMFVGLQGSGKTTT					Carbamidomethyl (C)[18]						Mascot
									CTK
		2118.06		2118.02	-0.0403	-19	101	120	TSVVMFVGLQGSGKTTT					Carbamidomethyl (C)[18], Oxidation (M)[5]						Mascot
									CTK
		2238.89		2239.08	0.188	84	376	394	YMTMMDSMTDEELDSTN											Mascot
									PK
		2296.12		2296.06	-0.0556	-24	343	363	MGPINQVFSMLPGYSAD											Mascot
									LMPK
		2720.41		2720.23	-0.1845	-68	74	97	IIQQAVFNELCKMLDPGK					Oxidation (M)[13]						Mascot
									PSFTPK
		2749.42		2749.28	-0.139	-51	1	26	MVLAQLGGSISRALQQM					Oxidation (M)[1]						Mascot
									SSATVIDEK
	7	hypothetical protein Csa_3G731000 [Cucumis sativus]										KGN58738.1		34691.2	9.62		9	32	0
		Protein Group
		PREDICTED: mitochondrial succinate-fumarate										XP_004137702.1		34691.2		9.6199
		transporter 1 [Cucumis sativus]														998855
																5908
		Peptide Information
		Calc. Mass		Obsrv. Mass	± da	± ppm	Start	End	Sequence			Ion	C. I. %	Modification					Rank	Result Type
							Seq.	Seq.				Score
		819.425		819.377	-0.0473	-58	311	317	YLQDAPI											Mascot
		831.429		831.45	0.0207	25	261	267	GMFHAIR											Mascot
		851.433		851.351	-0.0816	-96	19	25	SIPPYMK					Oxidation (M)[6]						Mascot
		870.53		870.547	0.0172	20	150	157	GLTPELLK											Mascot
		1797.04		1796.9	-0.1428	-79	76	91	ALWKGLTPFATHLTLK											Mascot
		2204.11		2204.06	-0.0557	-25	26	47	AISGSLGGVMEACCLQPI											Mascot
									DVIK
		2221.1		2221.09	-0.0092	-4	55	75	SGAYKGIVHCGTTVTQTE					Carbamidomethyl (C)[10]						Mascot
									GVR
		2477.26		2477.11	-0.1455	-59	26	49	AISGSLGGVMEACCLQPI					Oxidation (M)[10]						Mascot
									DVIKTR
		2575.3		2575.23	-0.0776	-30	26	49	AISGSLGGVMEACCLQPI					Carbamidomethyl (C)[13,14]						Mascot
									DVIKTR
		2709.49		2709.23	-0.2639	-97	286	309	LMRIPPGQAIVWAVADQII											Mascot
									GLYER
	8	hypothetical protein Csa_1G467120 [Cucumis sativus]										KGN65592.1		51696.6	6.61		11	31	0
		Protein Group
		PREDICTED: serine/threonine-protein kinase HT1										XP_004147392.1		51696.6		6.61
		[Cucumis sativus]														1335
Project 1\Sample project20170120\R17064-3																				5	of	108
																144
		Peptide Information
		Calc. Mass		Obsrv. Mass	± da	± ppm	Start	End	Sequence			Ion	C. I. %	Modification					Rank	Result Type
							Seq.	Seq.				Score
		811.358		811.38	0.0222	27	329	335	NNGYDTK											Mascot
		848.408		848.426	0.0177	21	381	387	CYAHGIK					Carbamidomethyl (C)[1]						Mascot
		907.394		907.324	-0.0702	-77	18	25	QSSMAPDR					Oxidation (M)[4]						Mascot
		907.394		907.324	-0.0702	-77	18	25	QSSMAPDR					Oxidation (M)[4]						Mascot
		923.393		923.316	-0.0765	-83	431	438	CFQDPDAK											Mascot
		1074.55		1074.57	0.0201	19	167	175	GTFHLASWR											Mascot
		1479.66		1479.79	0.1319	89	308	320	EDKPLTCQDTACR											Mascot
		1941.08		1940.89	-0.1879	-97	406	421	QIITRLETIHHSLSHR											Mascot
		2082.95		2082.98	0.0334	16	26	44	QPEEAELAEDGEEIDPGV											Mascot
									R
		2233.12		2233.08	-0.0386	-17	388	405	ELIEACWDERPSKRPTFR											Mascot
		2267.16		2267.08	-0.0823	-36	76	95	TALHIAACQGCNEIVDLLL					Carbamidomethyl (C)[8,11]						Mascot
									R
		2902.48		2902.33	-0.1555	-54	210	235	HPNVVQFLGAVTQSSPM					Oxidation (M)[17]						Mascot
									MIVTEYLPK
	9	PREDICTED: mitochondrial carnitine/acylcarnitine										XP_004148481.1		30853.2	9.66		8	31	0
		carrier-like protein [Cucumis sativus]
		Peptide Information
		Calc. Mass		Obsrv. Mass	± da	± ppm	Start	End	Sequence			Ion	C. I. %	Modification					Rank	Result Type
							Seq.	Seq.				Score
		806.398		806.336	-0.0618	-77	269	276	GFGPAMAR											Mascot
		826.514		826.437	-0.0777	-94	172	179	GLVPTLAR											Mascot
		953.44		953.369	-0.0705	-74	150	158	YGGPMDVAK					Oxidation (M)[5]						Mascot
		985.441		985.493	0.0521	53	46	54	YSGAMDAVR					Oxidation (M)[5]						Mascot
		1838.95		1838.89	-0.0541	-29	277	292	SVPANAVCFLVYEITR					Carbamidomethyl (C)[8]						Mascot
		2322.23		2322.11	-0.1202	-52	106	129	HQVVCGAGAGVAVSLVA											Mascot
									CPTELIK
		2464.34		2464.23	-0.1108	-45	64	87	GLYKGMGAPLATVAAQN					Oxidation (M)[6]						Mascot
									AVLFTVR
		2575.4		2575.23	-0.1687	-66	172	195	GLVPTLAREVPGNAVVF					Oxidation (M)[22]						Mascot
									GVYEMLK
	10	hypothetical protein Csa_6G489990 [Cucumis sativus]										KGN48483.1		49969.2	8.47		11	30	0
		Protein Group
		PREDICTED: B3 domain-containing transcription factor										XP_004142019.2		49969.2		8.47
		VRN1 [Cucumis sativus]														2670
																2881
		Peptide Information
							Start	End				Ion
Project 1\Sample project20170120\R17064-3		Calc. Mass		Obsrv. Mass	± da	± ppm			Sequence				C. I. %	Modification					Rank	6	Result Type	of	108
							Seq.	Seq.				Score
		808.431		808.353	-0.0782	-97	424	430	VSFSRNV											Mascot
		826.453		826.437	-0.0161	-19	193	199	HEAKVSR											Mascot
		837.435		837.4	-0.0352	-42	157	163	DDLFTVK											Mascot
		857.404		857.405	0.0013	2	27	33	FVEDYGK											Mascot
		985.499		985.493	-0.0061	-6	26	33	KFVEDYGK											Mascot
		1699.76		1699.82	0.0554	33	410	423	CLFEMVNTEHCVFK											Mascot
		1838.84		1838.89	0.0551	30	361	376	YFSPEMHSADLQVGNK					Oxidation (M)[6]						Mascot
		2233.24		2233.08	-0.1584	-71	299	317	EGDIGLFQLINKHIFLFTK											Mascot
		2292.06		2292.08	0.0188	8	410	428	CLFEMVNTEHCVFKVSF					Oxidation (M)[5]						Mascot
									SR
		2299.08		2299.1	0.0142	6	357	376	FANKYFSPEMHSADLQV					Oxidation (M)[10]						Mascot
									GNK
		3347.63		3347.6	-0.0269	-8	237	265	FNMVIPYDFAVKCLSEEV					Carbamidomethyl (C)[13], Oxidation (M)[3]						Mascot
									GTIELQTTNGR
Project 1\Sample project20170120\R17064-3																				7	of	108
Gel Idx/Pos			257/K9						Instr./Gel Origin		BA2151/Sample Project 20170120					Process Status			Analysis Succeeded
Plate [#] Name			[1] Sample Project 20170120						Instrument Sample Name							Spectra			11
Rank		Protein Name						Species				Accession No.		Protein MW		Protein	Pep.	Protein	Protein	Total Ion	Total Ion
																PI	Count	Score	Score	Score	C. I. %
																			C. I. %
	1	hypothetical protein Csa_3G304140 [Cucumis sativus]										KGN57792.1		39251.8	5.82		13	406	100	338	100
		Protein Group
		glutamine synthetase [Cucumis sativus]										AEZ56958.1		39251.8		5.82
																1716
																6138
		glutamine synthetase cytosolic isozyme-like [Cucumis										NP_001267644.1		39251.8		5.82
		sativus]														1716
																6138
		Peptide Information
		Calc. Mass		Obsrv. Mass	± da	± ppm	Start	End	Sequence			Ion	C. I. %	Modification					Rank	Result Type
							Seq.	Seq.				Score
		1345.61		1345.6	-0.0122	-9	279	290	EHIAAYGEGNER											Mascot
		1345.61		1345.6	-0.0122	-9	279	290	EHIAAYGEGNER											Mascot
		1413.67		1413.66	-0.007	-5	256	267	SMREEGGYEVIK					Oxidation (M)[2]						Mascot
		1501.71		1501.68	-0.0296	-20	279	291	EHIAAYGEGNERR											Mascot
		1610.77		1610.75	-0.0207	-13	277	290	HKEHIAAYGEGNER											Mascot
		1610.77		1610.75	-0.0207	-13	277	290	HKEHIAAYGEGNER			17	0							Mascot
		1793.93		1793.9	-0.0214	-12	19	34	IIAEYIWIGGSGMDLR											Mascot
		1793.93		1793.9	-0.0214	-12	19	34	IIAEYIWIGGSGMDLR			114	100							Mascot
		1809.92		1809.89	-0.0317	-18	19	34	IIAEYIWIGGSGMDLR					Oxidation (M)[13]						Mascot
		1809.92		1809.89	-0.0317	-18	19	34	IIAEYIWIGGSGMDLR			21	14.523	Oxidation (M)[13]						Mascot
		1840.87		1840.85	-0.0241	-13	296	311	HETADIHTFSWGVANR											Mascot
		1840.87		1840.85	-0.0241	-13	296	311	HETADIHTFSWGVANR			82	100							Mascot
		2373.18		2373.13	-0.0493	-21	85	106	GNNILVVCDTYTPAGEPI					Carbamidomethyl (C)[8]						Mascot
									PTNK
		2529.28		2529.24	-0.0356	-14	85	107	GNNILVVCDTYTPAGEPI					Carbamidomethyl (C)[8]						Mascot
									PTNKR
		2529.28		2529.24	-0.0356	-14	85	107	GNNILVVCDTYTPAGEPI			19	0	Carbamidomethyl (C)[8]						Mascot
									PTNKR
		2704.3		2704.24	-0.0569	-21	141	165	WPIGWPIGGFPGPQGPY					Carbamidomethyl (C)[19]						Mascot
									YCGVGVDK
		2706.36		2706.3	-0.0595	-22	333	356	RPASNMDPYVVTSMVAE											Mascot
									TTILWKP
		2706.36		2706.3	-0.0595	-22	333	356	RPASNMDPYVVTSMVAE											Mascot
									TTILWKP
		2722.36		2722.29	-0.0679	-25	333	356	RPASNMDPYVVTSMVAE					Oxidation (M)[6]						Mascot
									TTILWKP
		2738.35		2738.28	-0.0694	-25	333	356	RPASNMDPYVVTSMVAE					Oxidation (M)[6,14]						Mascot
									TTILWKP
Project 1\Sample project20170120\R17064-3																				8	of	108
		2961.5		2961.45	-0.0549	-19	113	137	IFSHPDVVAEVPWYGIEQ											Mascot
									EYTLLQK
		2961.5		2961.45	-0.0549	-19	113	137	IFSHPDVVAEVPWYGIEQ											Mascot
									EYTLLQK
		3000.4		3000.37	-0.0307	-10	53	79	WNYDGSSTGQAPGEDS											Mascot
									EVILYPQAIFR
		3000.4		3000.37	-0.0307	-10	53	79	WNYDGSSTGQAPGEDS			107	100							Mascot
									EVILYPQAIFR
		3386.7		3386.67	-0.0345	-10	224	255	ITEIAGVVLSFDPKPIQGD											Mascot
									WNGAGAHTNYSTK
	2	hypothetical protein Csa_1G025040 [Cucumis sativus]										KGN63872.1		39098.4	8.49		10	42	0
		Protein Group
		PREDICTED: WUSCHEL-related homeobox 1										XP_011649155.1		39098.4		8.4899
		[Cucumis sativus]														997711
																1816
		Peptide Information
		Calc. Mass		Obsrv. Mass	± da	± ppm	Start	End	Sequence			Ion	C. I. %	Modification					Rank	Result Type
							Seq.	Seq.				Score
		1510.71		1510.77	0.057	38	257	270	GHNVVIDDINDGDK											Mascot
		1789.85		1789.87	0.0299	17	209	222	LVELEEEEEEETRR											Mascot
		1809.91		1809.89	-0.0184	-10	132	145	IEGKNVFYWFQNHK											Mascot
		1809.91		1809.89	-0.0184	-10	132	145	IEGKNVFYWFQNHK											Mascot
		1840.87		1840.85	-0.0187	-10	257	273	GHNVVIDDINDGDKDSK											Mascot
		1840.87		1840.85	-0.0187	-10	257	273	GHNVVIDDINDGDKDSK											Mascot
		1862.89		1862.82	-0.0662	-36	207	221	TKLVELEEEEEEETR											Mascot
		2225.1		2225.08	-0.023	-10	315	333	SFTLSPSCSFQFFEFLPL											Mascot
									K
		2657.3		2657.35	0.055	21	182	205	WPGTPTPPSTATLLSQE											Mascot
									CTETQRR
		2722.31		2722.29	-0.0181	-7	40	62	ANGRRPNFSSQYYHIGN											Mascot
									VLDEER
		2961.43		2961.45	0.02	7	65	92	DQYLLNNEKSSSSSSTTS											Mascot
									STPIVVSSSR
		2961.43		2961.45	0.02	7	65	92	DQYLLNNEKSSSSSSTTS											Mascot
									STPIVVSSSR
		2983.28		2983.39	0.1172	39	1	26	MWTLGYDDNGGEFCFSE					Carbamidomethyl (C)[14], Oxidation (M)[1]						Mascot
									ATAFHGARK
	3	hypothetical protein Csa_7G329380 [Cucumis sativus]										KGN44553.1		106847	5.7		18	42	0
		Protein Group
		PREDICTED: uncharacterized protein LOC101207165										XP_004139729.1		106847		5.6999
		[Cucumis sativus]														998092
																6514
		Peptide Information
		Calc. Mass		Obsrv. Mass	± da	± ppm	Start	End	Sequence			Ion	C. I. %	Modification					Rank	Result Type
							Seq.	Seq.				Score
		1439.73		1439.75	0.0173	12	344	356	TAVPQQPCLSPNK					Carbamidomethyl (C)[8]						Mascot
Project 1\Sample project20170120\R17064-3				1439.75																9	Mascot	of	108
		1479.73		1479.76	0.0324	22	224	236	EFQDALEVLSSNK											Mascot
		1592.75		1592.82	0.0689	43	84	96	TPMKMLIDHEMSK					Oxidation (M)[3,5]						Mascot
		1712.87		1712.87	-0.0004	0	293	308	QVKKPAQVSHSTGCDK											Mascot
		1743.89		1743.9	0.0036	2	111	127	LMGLDTLPEQVGSAANK											Mascot
		1745.91		1745.89	-0.0191	-11	142	156	LALECTELVDNRLEK											Mascot
		1779.9		1779.89	-0.0131	-7	923	937	GWIHQLQEELDNLGK											Mascot
		1791.89		1791.84	-0.0531	-30	277	292	LVGSENISETGIRCEK					Carbamidomethyl (C)[14]						Mascot
		1822.92		1822.86	-0.0539	-30	221	236	QSKEFQDALEVLSSNK											Mascot
		1833.86		1833.95	0.0839	46	817	832	NNFANLSDKEPEQEAK											Mascot
		1872.9		1872.84	-0.06	-32	296	313	KPAQVSHSTGCDKSSNA											Mascot
									R
		1918		1917.84	-0.1584	-83	339	356	NHGVKTAVPQQPCLSPN											Mascot
									K
		2224.99		2225.08	0.0871	39	526	544	EFASCVSTDLQEDNRNS					Carbamidomethyl (C)[5]						Mascot
									PR
		2277.16		2277.16	0.0039	2	563	584	LGFDASNLATSDVTPEKV											Mascot
									SPTK
		2283.08		2283.05	-0.0305	-13	415	435	SENEYAVGVLSDLELMS											Mascot
									PSSR
		2292.2		2292.09	-0.1091	-48	918	937	EVVGKGWIHQLQEELDN											Mascot
									LGK
		2633.43		2633.31	-0.1243	-47	102	127	IAPPNVVAKLMGLDTLPE											Mascot
									QVGSAANK
		3012.47		3012.38	-0.0932	-31	616	645	EGLDTSVPETLGASLPPG											Mascot
									RIGDASCVNNSR
	4	hypothetical protein Csa_1G574900 [Cucumis sativus]										KGN66173.1		40596.5	9.09		10	38	0
		Protein Group
		PREDICTED: uncharacterized protein LOC101220646										XP_004135671.1		40596.5		9.09
		[Cucumis sativus]														1525
																8789
		Peptide Information
		Calc. Mass		Obsrv. Mass	± da	± ppm	Start	End	Sequence			Ion	C. I. %	Modification					Rank	Result Type
							Seq.	Seq.				Score
		940.473		940.457	-0.0166	-18	27	34	NPDPEQLK											Mascot
		1567.83		1567.73	-0.103	-66	97	109	LNSLNYLFSLPMR											Mascot
		1789.9		1789.87	-0.0224	-13	11	26	SQASMKPSNSIQSPRR					Oxidation (M)[5]						Mascot
		1833.99		1833.95	-0.0399	-22	307	323	QALLATTQATTRMVSNK											Mascot
		1911.9		1911.91	0.0102	5	253	271	SMLDMVGVASGSVMGP					Oxidation (M)[2]						Mascot
									VMK
		2395.16		2395.11	-0.0518	-22	253	276	SMLDMVGVASGSVMGP											Mascot
									VMKSQAGR
		2427.15		2427.15	-0.0037	-2	253	276	SMLDMVGVASGSVMGP					Oxidation (M)[2,5]						Mascot
									VMKSQAGR
		2691.44		2691.27	-0.1621	-60	166	190	IDDYNNILAKAIAEGTGQI											Mascot
									VQGIFK
		2738.16		2738.28	0.123	45	137	160	DNSCFSSSSSSLCNANN					Carbamidomethyl (C)[4,13]						Mascot
Project 1\Sample project20170120\R17064-3				2738.28																10	Mascot	of	108
									KSMINWK
		2961.42		2961.45	0.0291	10	191	218	CSNSYANQVNKGGEMIL											Mascot
									NSPPPVASVER
		2961.42		2961.45	0.0291	10	191	218	CSNSYANQVNKGGEMIL											Mascot
									NSPPPVASVER
		3032.45		3032.36	-0.0928	-31	110	136	DGDPLSYGVTFLEQNSS											Mascot
									SLNWLDSFLK
	5	hypothetical protein Csa_1G066520 [Cucumis sativus]										KGN64583.1		56264.1	9.16		14	36	0
		Protein Group
		PREDICTED: BTB/POZ domain-containing protein										XP_004145160.1		56264.1		9.1599
		At3g22104-like [Cucumis sativus]														998474
																1211
		Peptide Information
		Calc. Mass		Obsrv. Mass	± da	± ppm	Start	End	Sequence			Ion	C. I. %	Modification					Rank	Result Type
							Seq.	Seq.				Score
		1261.55		1261.61	0.0653	52	209	218	MMVSHNFDHK					Oxidation (M)[1]						Mascot
		1266.66		1266.69	0.0231	18	127	136	QYQICASIRK					Carbamidomethyl (C)[5]						Mascot
		1308.62		1308.7	0.0825	63	364	375	FSALAMAMSHSR											Mascot
		1367.7		1367.64	-0.0623	-46	419	429	HLAQNPKFPCR					Carbamidomethyl (C)[10]						Mascot
		1439.62		1439.75	0.1264	88	457	470	ETPFGCTSNGNAGK					Carbamidomethyl (C)[6]						Mascot
		1592.88		1592.82	-0.0584	-37	412	425	LSNETLKHLAQNPK											Mascot
		1610.78		1610.75	-0.0315	-20	361	375	ASKFSALAMAMSHSR					Oxidation (M)[9]						Mascot
		1610.78		1610.75	-0.0315	-20	361	375	ASKFSALAMAMSHSR					Oxidation (M)[9]						Mascot
		1791.84		1791.84	-0.003	-2	439	453	QDSPIDLFCHTMISK					Carbamidomethyl (C)[9]						Mascot
		1807.88		1807.88	0.0065	4	454	470	VLRETPFGCTSNGNAGK					Carbamidomethyl (C)[9]						Mascot
		1810.02		1809.89	-0.1335	-74	72	87	VEITPSNIILLHYAAR											Mascot
		1810.02		1809.89	-0.1335	-74	72	87	VEITPSNIILLHYAAR											Mascot
		1840.95		1840.85	-0.0988	-54	403	418	ICSALNYSKLSNETLK					Carbamidomethyl (C)[2]						Mascot
		1840.95		1840.85	-0.0988	-54	403	418	ICSALNYSKLSNETLK					Carbamidomethyl (C)[2]						Mascot
		2079.02		2078.96	-0.0627	-30	436	453	ISKQDSPIDLFCHTMISK					Oxidation (M)[15]						Mascot
		2330.03		2330.04	0.0073	3	1	21	MGVCCDLEVDVNGEATF					Carbamidomethyl (C)[4], Oxidation (M)[1]						Mascot
									LVDK
		2512.21		2512.18	-0.0312	-12	381	400	LYQAIDLYFQVHVELCED					Carbamidomethyl (C)[16]						Mascot
									EK
	6	Phenylalanine ammonia-lyase [Cucumis sativus]										KGN48160.1		77984.1	6.37		14	36	0
		Protein Group
		PREDICTED: phenylalanine ammonia-lyase 1 [Cucumis										XP_004143255.1		77984.1		6.3699
		sativus]														998855
																5908
		Peptide Information
		Calc. Mass		Obsrv. Mass	± da	± ppm	Start	End	Sequence			Ion	C. I. %	Modification					Rank	Result Type
							Seq.	Seq.				Score
		Calc. Mass		Obsrv. Mass	± da	± ppm			Sequence				C. I. %	Modification					Rank	Result Type
Project 1\Sample project20170120\R17064-3																				11	of	108
		1261.71		1261.61	-0.1005	-80	532	543	STVKNTVSQVAK											Mascot
		1479.8		1479.76	-0.0339	-23	334	345	KLHEMDPLQKPK					Oxidation (M)[5]						Mascot
		1587.8		1587.85	0.0527	33	218	233	SNSKAIGPNGESLDAK											Mascot
		1712.82		1712.87	0.0506	30	637	651	FAYENGNSTVQNQIK											Mascot
		1743.82		1743.9	0.0749	43	2	17	AELGHQNGVEFCIGGR					Carbamidomethyl (C)[12]						Mascot
		1807.91		1807.88	-0.0261	-14	678	694	SPGEVCEKVFIALCQGK											Mascot
		1833.84		1833.95	0.108	59	1	17	MAELGHQNGVEFCIGGR					Oxidation (M)[1]						Mascot
		1840.92		1840.85	-0.0703	-38	637	652	FAYENGNSTVQNQIKK											Mascot
		1840.92		1840.85	-0.0703	-38	637	652	FAYENGNSTVQNQIKK											Mascot
		1938.02		1937.9	-0.116	-60	508	524	LMSSTFLVALCQAIDLR					Carbamidomethyl (C)[11]						Mascot
		1940.95		1940.89	-0.0576	-30	18	35	NNINNDPLNWGAAAESL											Mascot
									K
		2330.13		2330.04	-0.0884	-38	390	411	NKALHGGNFQGTPIGVS					Oxidation (M)[18]						Mascot
									MDNTR
		2369.17		2369.24	0.0669	28	695	714	MIDPILECLKEWNGAPIPI					Carbamidomethyl (C)[8,20]						Mascot
									C
		2657.32		2657.35	0.0371	14	593	616	QVLVEHALSNGEDEKNA											Mascot
									NSSIFQK
		3015.6		3015.38	-0.2119	-70	56	85	LGGETLTISQVAAIASRDS											Mascot
									GVVVELSESAR
	7	PREDICTED: BTB/POZ domain-containing protein										XP_004139801.1		30618	5.14		6	35	0	15	0
		At4g08455 [Cucumis sativus]
		Peptide Information
		Calc. Mass		Obsrv. Mass	± da	± ppm	Start	End	Sequence			Ion	C. I. %	Modification					Rank	Result Type
							Seq.	Seq.				Score
		1327.62		1327.6	-0.0194	-15	230	239	RDEYMELVEK					Oxidation (M)[5]						Mascot
		1789.74		1789.87	0.1308	73	26	42	CLSCLEEYPSGEAGTCK											Mascot
		1840.84		1840.85	0.0069	4	122	137	AMLENEMEESRSGTIK					Oxidation (M)[2]						Mascot
		1840.84		1840.85	0.0069	4	122	137	AMLENEMEESRSGTIK			15	0	Oxidation (M)[7]						Mascot
		1856.84		1856.85	0.0124	7	122	137	AMLENEMEESRSGTIK					Oxidation (M)[2,7]						Mascot
		1940.88		1940.89	0.0044	2	117	132	SPVFRAMLENEMEESR					Oxidation (M)[7]						Mascot
		2276.13		2276.16	0.0271	12	243	262	LVVEIYEAYMSKQVNTAA					Oxidation (M)[10]						Mascot
									CK
		2330.05		2330.04	-0.0064	-3	6	25	CLSSRVISDTESESDQEL					Carbamidomethyl (C)[1], Oxidation (M)[19]						Mascot
									MK
	8	PREDICTED: sphingosine kinase 1 isoform X2										XP_011658196.1		30778.8	6.07		8	35	0
		[Cucumis sativus]
		Peptide Information
		Calc. Mass		Obsrv. Mass	± da	± ppm	Start	End	Sequence			Ion	C. I. %	Modification					Rank	Result Type
							Seq.	Seq.				Score
Project 1\Sample project20170120\R17064-3																				12	of	108
		1743.87		1743.9	0.0286	16	25	41	GHKCSLDVATISQGEAK											Mascot
		1825.92		1825.89	-0.0276	-15	173	188	MSDGFLDLIIIRDCSK											Mascot
		1882.94		1882.93	-0.006	-3	173	188	MSDGFLDLIIIRDCSK					Carbamidomethyl (C)[14]						Mascot
		1940.96		1940.89	-0.0729	-38	129	144	HGYEGPNINLKDLEWR											Mascot
		1955.03		1954.89	-0.1437	-74	227	245	EPSKEGIIDADGEILALGK											Mascot
		2330.24		2330.04	-0.2027	-87	231	253	EGIIDADGEILALGKGTLT											Mascot
									TSQK
		2439.28		2439.17	-0.1192	-49	2	24	VKSLLHSIGDPCTACNAT					Carbamidomethyl (C)[12]						Mascot
									LAIVR
		2529.3		2529.24	-0.0576	-23	1	24	MVKSLLHSIGDPCTACNA					Oxidation (M)[1]						Mascot
									TLAIVR
		2529.3		2529.24	-0.0576	-23	1	24	MVKSLLHSIGDPCTACNA					Oxidation (M)[1]						Mascot
									TLAIVR
		2706.4		2706.3	-0.0925	-34	42	64	HFTVLMLAWGLVADIDIE											Mascot
									SEKYR
		2706.4		2706.3	-0.0925	-34	42	64	HFTVLMLAWGLVADIDIE											Mascot
									SEKYR
		2722.39		2722.29	-0.1009	-37	42	64	HFTVLMLAWGLVADIDIE					Oxidation (M)[6]						Mascot
									SEKYR
	9	PREDICTED: oxygen-evolving enhancer protein 2,										XP_004147746.1		28121.2	8.61		8	34	0
		chloroplastic [Cucumis sativus]
		Protein Group
		23kDa polypeptide of the oxygen-evolving complex of										BAA89317.1		28121.2		8.6099
		photosystem II [Cucumis sativus]														996566
																7725
		Oxygen-evolving enhancer protein 2 [Cucumis sativus]										KGN53510.1		28121.2		8.6099
																996566
																7725
		RecName: Full=Oxygen-evolving enhancer protein 2,										sp|Q9SLQ8.1|PSB		28121.2		8.6099
		chloroplastic; Short=OEE2; AltName: Full=23 kDa										P_CUCSA				996566
		subunit of oxygen evolving system of photosystem II;														7725
		AltName: Full=23 kDa thylakoid membrane protein;
		AltName: Full=OEC 23 kDa subunit; AltName: Full=O
		Peptide Information
		Calc. Mass		Obsrv. Mass	± da	± ppm	Start	End	Sequence			Ion	C. I. %	Modification					Rank	Result Type
							Seq.	Seq.				Score
		1266.65		1266.69	0.0344	27	233	243	LYICKAQAGDK					Carbamidomethyl (C)[4]						Mascot
		1501.8		1501.68	-0.1203	-80	161	173	VDYLLGKQAYFGK											Mascot
		1793.89		1793.9	0.0176	10	2	18	ASTSCFLHHHALTAAAR											Mascot
		1793.89		1793.9	0.0176	10	2	18	ASTSCFLHHHALTAAAR											Mascot
		1840.91		1840.85	-0.0663	-36	39	55	AQKQQPAQEEEGGVVS											Mascot
									R
		1840.91		1840.85	-0.0663	-36	39	55	AQKQQPAQEEEGGVVS											Mascot
									R
		1917.03		1916.85	-0.1789	-93	221	237	HQLITATVNDGKLYICK											Mascot
		1940.92		1940.89	-0.0335	-17	1	18	MASTSCFLHHHALTAAA					Oxidation (M)[1]						Mascot
									R
		2395.17		2395.11	-0.0601	-25	2	24	ASTSCFLHHHALTAAARS											Mascot
Project 1\Sample project20170120\R17064-3				2395.11																13	Mascot	of	108
									SSSPR
		2720.3		2720.25	-0.0537	-20	174	201	TASEGGFDPDAVATANIL											Mascot
									EATASNVNGK
	10	hypothetical protein Csa_7G420690 [Cucumis sativus]										KGN45076.1		39093.6	5.77		6	34	0	17	0
		Protein Group
		PREDICTED: glutamine synthetase nodule isozyme-like										XP_004135959.1		39093.6		5.7699
		isoform X1 [Cucumis sativus]														999809
																2651
		Peptide Information
		Calc. Mass		Obsrv. Mass	± da	± ppm	Start	End	Sequence			Ion	C. I. %	Modification					Rank	Result Type
							Seq.	Seq.				Score
		1345.61		1345.6	-0.0122	-9	279	290	EHIAAYGEGNER											Mascot
		1345.61		1345.6	-0.0122	-9	279	290	EHIAAYGEGNER											Mascot
		1501.71		1501.68	-0.0296	-20	279	291	EHIAAYGEGNERR											Mascot
		1610.77		1610.75	-0.0207	-13	277	290	HKEHIAAYGEGNER											Mascot
		1610.77		1610.75	-0.0207	-13	277	290	HKEHIAAYGEGNER			17	0							Mascot
		1761.95		1761.87	-0.083	-47	19	34	IIAEYVWIGGSGLDLR											Mascot
		1890.01		1889.92	-0.0913	-48	2	18	SLLSDLINLDLTNTTEK											Mascot
		1890.01		1889.92	-0.0913	-48	2	18	SLLSDLINLDLTNTTEK											Mascot
		3386.7		3386.67	-0.0345	-10	224	255	ITEIAGVVVTFDPKPIQGD											Mascot
									WNGAGAHTNYSTK
Project 1\Sample project20170120\R17064-3																				14	of	108
Gel Idx/Pos			258/K10						Instr./Gel Origin		BA2151/Sample Project 20170120					Process Status			Analysis Succeeded
Plate [#] Name			[1] Sample Project 20170120						Instrument Sample Name							Spectra			11
Rank		Protein Name						Species				Accession No.		Protein MW		Protein	Pep.	Protein	Protein	Total Ion	Total Ion
																PI	Count	Score	Score	Score	C. I. %
																			C. I. %
	1	hypothetical protein Csa_3G386810 [Cucumis sativus]										KGN57908.1		54382	5.71		8	196	100	173	100
		Protein Group
		PREDICTED: 11S globulin seed storage protein 2-like										XP_011652795.1		54382		5.71
		[Cucumis sativus]														381
																4697
		Peptide Information
		Calc. Mass		Obsrv. Mass	± da	± ppm	Start	End	Sequence			Ion	C. I. %	Modification					Rank	Result Type
							Seq.	Seq.				Score
		867.527		867.522	-0.0049	-6	47	53	VRPPSRR											Mascot
		1097.53		1097.52	-0.0124	-11	33	41	FTTEAQLCK					Carbamidomethyl (C)[8]						Mascot
		1351.81		1351.79	-0.0158	-12	81	92	NIIRPNSLSLPK											Mascot
		1351.81		1351.79	-0.0158	-12	81	92	NIIRPNSLSLPK											Mascot
		1457.72		1457.72	-0.0054	-4	30	41	GFRFTTEAQLCK					Carbamidomethyl (C)[11]						Mascot
		2890.32		2890.3	-0.022	-8	361	385	MVYVVDGEAEIQISDDYG											Mascot
									NQVFNER
		2906.31		2906.3	-0.0144	-5	361	385	MVYVVDGEAEIQISDDYG					Oxidation (M)[1]						Mascot
									NQVFNER
		2981.35		2981.31	-0.0324	-11	54	80	IESEGGITELWDEADEEF					Carbamidomethyl (C)[20]						Mascot
									QCAGVGAIR
		2981.35		2981.31	-0.0324	-11	54	80	IESEGGITELWDEADEEF			145	100	Carbamidomethyl (C)[20]						Mascot
									QCAGVGAIR
		3119.54		3119.43	-0.1142	-37	389	415	GNMFVIPQFYPALARAG					Oxidation (M)[3]						Mascot
									QEGFEWVTFK
		3137.45		3137.4	-0.0449	-14	53	80	RIESEGGITELWDEADEE					Carbamidomethyl (C)[21]						Mascot
									FQCAGVGAIR
		3137.45		3137.4	-0.0449	-14	53	80	RIESEGGITELWDEADEE			28	93.346	Carbamidomethyl (C)[21]						Mascot
									FQCAGVGAIR
	2	hypothetical protein Csa_5G609710 [Cucumis sativus]										KGN52085.1		20685.2	8.24		13	89	99.993
		Protein Group
		PREDICTED: ribulose bisphosphate carboxylase small										XP_004135094.1		20685.2		8.2399
		chain, chloroplastic [Cucumis sativus]														997711
																1816
		ribulose-1,5-bisphosphate carboxylase small subunit										CCF55356.1		20713.2		8.2399
		[Cucumis sativus]														997711
																1816
Project 1\Sample project20170120\R17064-3																				15	of	108
		Peptide Information
		Calc. Mass		Obsrv. Mass	± da	± ppm	Start	End	Sequence			Ion	C. I. %	Modification					Rank	Result Type
							Seq.	Seq.				Score
		914.4		914.392	-0.0081	-9	117	124	SPGYYDGR											Mascot
		914.4		914.392	-0.0081	-9	117	124	SPGYYDGR											Mascot
		919.5		919.493	-0.0066	-7	160	167	VIGFDNVR											Mascot
		937.562		937.556	-0.006	-6	62	69	VWPPLGLR											Mascot
		968.451		968.449	-0.0014	-1	88	94	ECDYLLR					Carbamidomethyl (C)[2]						Mascot
		1010.49		1010.49	-0.0087	-9	152	159	EYPDAFIR											Mascot
		1138.59		1138.57	-0.0157	-14	151	159	KEYPDAFIR											Mascot
		1706.9		1706.88	-0.0203	-12	168	181	QVQCISFIAYKPPR					Carbamidomethyl (C)[4]						Mascot
		2044.96		2044.96	0.0059	3	95	112	NGWVPCVEFDIGSGFVY											Mascot
									R
		2101.98		2101.94	-0.0386	-18	95	112	NGWVPCVEFDIGSGFVY					Carbamidomethyl (C)[6]						Mascot
									R
		2146.04		2145.95	-0.0826	-38	70	87	KFETLSYLPDMSNEQLSK					Oxidation (M)[11]						Mascot
		2225.05		2225.08	0.0342	15	131	150	LPMFGCTDSSQVIQEIEE											Mascot
									AK
		2353.14		2353.02	-0.1238	-53	131	151	LPMFGCTDSSQVIQEIEE											Mascot
									AKK
		2369.14		2369.02	-0.1125	-47	131	151	LPMFGCTDSSQVIQEIEE					Oxidation (M)[3]						Mascot
									AKK
		2937.37		2937.31	-0.0618	-21	88	112	ECDYLLRNGWVPCVEFD											Mascot
									IGSGFVYR
		3152.44		3152.41	-0.0273	-9	125	150	YWTMWKLPMFGCTDSS					Oxidation (M)[4,9]						Mascot
									QVIQEIEEAK
	3	ribulose bisphosphate carboxylase/oxygenase										AAA33131.1		21049.4	7.55		12	78	99.921
		precursor peptide [Cucumis sativus]
		Protein Group
		RecName: Full=Ribulose bisphosphate carboxylase										sp|P08474.1|RBS_		21049.4		7.55
		small chain, chloroplastic; Short=RuBisCO small										CUCSA				1907
		subunit; Flags: Precursor														3486
		Peptide Information
		Calc. Mass		Obsrv. Mass	± da	± ppm	Start	End	Sequence			Ion	C. I. %	Modification					Rank	Result Type
							Seq.	Seq.				Score
		914.423		914.392	-0.0307	-34	125	130	YWTMWK											Mascot
		914.423		914.392	-0.0307	-34	125	130	YWTMWK											Mascot
		919.5		919.493	-0.0066	-7	160	167	VIGFDNVR											Mascot
		937.562		937.556	-0.006	-6	62	69	VWPPLGLR											Mascot
		968.451		968.449	-0.0014	-1	88	94	ECDYLLR					Carbamidomethyl (C)[2]						Mascot
		1010.49		1010.49	-0.0087	-9	152	159	EYPDAFIR											Mascot
Project 1\Sample project20170120\R17064-3																				16	of	108
		1138.59		1138.57	-0.0157	-14	151	159	KEYPDAFIR											Mascot
		2044.96		2044.96	0.0059	3	95	112	NGWVPCVEFDIGSGFVY											Mascot
									R
		2101.98		2101.94	-0.0386	-18	95	112	NGWVPCVEFDIGSGFVY					Carbamidomethyl (C)[6]						Mascot
									R
		2146.04		2145.95	-0.0826	-38	70	87	KFETLSYLPDMSNEQLSK					Oxidation (M)[11]						Mascot
		2225.05		2225.08	0.0342	15	131	150	LPMFGCTDSSQVIQEIEE											Mascot
									AK
		2353.14		2353.02	-0.1238	-53	131	151	LPMFGCTDSSQVIQEIEE											Mascot
									AKK
		2369.14		2369.02	-0.1125	-47	131	151	LPMFGCTDSSQVIQEIEE					Oxidation (M)[3]						Mascot
									AKK
		2937.37		2937.31	-0.0618	-21	88	112	ECDYLLRNGWVPCVEFD											Mascot
									IGSGFVYR
		3152.44		3152.41	-0.0273	-9	125	150	YWTMWKLPMFGCTDSS					Oxidation (M)[4,9]						Mascot
									QVIQEIEEAK
	4	putative chloroplast ribulose-1,5-bisphosphate										ABN41481.1		10907.3	5.24		7	52	67.727
		carboxylase/oxygenase small subunit, partial [Cucumis
		sativus]
		Peptide Information
		Calc. Mass		Obsrv. Mass	± da	± ppm	Start	End	Sequence			Ion	C. I. %	Modification					Rank	Result Type
							Seq.	Seq.				Score
		914.4		914.392	-0.0081	-9	21	28	SPGYYDGR											Mascot
		914.4		914.392	-0.0081	-9	21	28	SPGYYDGR											Mascot
		919.5		919.493	-0.0066	-7	64	71	VIGFDNVR											Mascot
		1010.49		1010.49	-0.0087	-9	56	63	EYPDAFIR											Mascot
		1138.59		1138.57	-0.0157	-14	55	63	KEYPDAFIR											Mascot
		2225.05		2225.08	0.0342	15	35	54	LPMFGCTDSSQVIQEIEE											Mascot
									AK
		2353.14		2353.02	-0.1238	-53	35	55	LPMFGCTDSSQVIQEIEE											Mascot
									AKK
		2369.14		2369.02	-0.1125	-47	35	55	LPMFGCTDSSQVIQEIEE					Oxidation (M)[3]						Mascot
									AKK
		3152.44		3152.41	-0.0273	-9	29	54	YWTMWKLPMFGCTDSS					Oxidation (M)[4,9]						Mascot
									QVIQEIEEAK
	5	hypothetical protein Csa_4G308470 [Cucumis sativus]										KGN54356.1		29172.9	4.95		9	44	0
		Protein Group
		PREDICTED: uncharacterized protein LOC101218084										XP_004147924.1		29172.9		4.9499
		[Cucumis sativus]														998092
																6514
		Peptide Information
		Calc. Mass		Obsrv. Mass	± da	± ppm	Start	End	Sequence			Ion	C. I. %	Modification					Rank	Result Type
							Seq.	Seq.				Score
		806.371		806.298	-0.0734	-91	137	143	NDDMLAK											Mascot
Project 1\Sample project20170120\R17064-3																				17	of	108
		807.392		807.317	-0.0746	-92	240	246	MASEIEK											Mascot
		922.488		922.425	-0.0635	-69	72	79	LTGFLDEK											Mascot
		1639.95		1639.9	-0.053	-32	56	69	QEILARIAQLQTQK											Mascot
		2225.2		2225.08	-0.1194	-54	220	239	VAVLGAMLIALISQFSYEQ					Oxidation (M)[7]						Mascot
									R
		2353.12		2353.02	-0.0986	-42	112	131	IMGNIESQMQVFEESVEL											Mascot
									NR
		2369.11		2369.02	-0.0874	-37	112	131	IMGNIESQMQVFEESVEL					Oxidation (M)[2]						Mascot
									NR
		2980.44		2980.31	-0.1289	-43	112	136	IMGNIESQMQVFEESVEL											Mascot
									NRQEIEK
		2997.58		2997.31	-0.264	-88	220	246	VAVLGAMLIALISQFSYEQ											Mascot
									RMASEIEK
		2997.58		2997.31	-0.264	-88	220	246	VAVLGAMLIALISQFSYEQ											Mascot
									RMASEIEK
		3013.57		3013.31	-0.2597	-86	220	246	VAVLGAMLIALISQFSYEQ					Oxidation (M)[7]						Mascot
									RMASEIEK
		3152.5		3152.41	-0.0847	-27	104	131	GLDEASARIMGNIESQM											Mascot
									QVFEESVELNR
	6	hypothetical protein Csa_2G000805 [Cucumis sativus]										KGN60573.1		8803.8	10.2		6	36	0
		Peptide Information
		Calc. Mass		Obsrv. Mass	± da	± ppm	Start	End	Sequence			Ion	C. I. %	Modification					Rank	Result Type
							Seq.	Seq.				Score
		1138.54		1138.57	0.0325	29	27	36	TSSEMLEGLR					Oxidation (M)[5]						Mascot
		1219.63		1219.67	0.0436	36	50	60	SSILRGQEDSK											Mascot
		1457.7		1457.72	0.0195	13	5	15	MVFYGVMLFYR					Oxidation (M)[1,7]						Mascot
		1569.8		1569.71	-0.0807	-51	4	15	KMVFYGVMLFYR					Oxidation (M)[2]						Mascot
		1639.84		1639.9	0.0601	37	23	36	FEIKTSSEMLEGLR											Mascot
		2239.14		2239.12	-0.0181	-8	5	22	MVFYGVMLFYRGVNLEL					Oxidation (M)[1,7]						Mascot
									R
	7	hypothetical protein Csa_6G507370 [Cucumis sativus]										KGN48964.1		20200.3	9.13		6	32	0
		Protein Group
		PREDICTED: thiosulfate sulfurtransferase 16,										XP_004134838.1		20200.3		9.13
		chloroplastic [Cucumis sativus]														1144
																4092
		Peptide Information
		Calc. Mass		Obsrv. Mass	± da	± ppm	Start	End	Sequence			Ion	C. I. %	Modification					Rank	Result Type
							Seq.	Seq.				Score
		807.37		807.317	-0.0534	-66	178	184	NGLPMEF											Mascot
		1457.83		1457.72	-0.1105	-76	30	42	GRLLPMITGSLQR					Oxidation (M)[6]						Mascot
		1576.83		1576.73	-0.1003	-64	123	135	NPHFLAEVAIYFR											Mascot
		2981.4		2981.31	-0.0842	-28	150	177	SLMAAADLLASGYNYVT					Oxidation (M)[3]						Mascot
Project 1\Sample project20170120\R17064-3				2981.31																18	Mascot	of	108
									DIAGGYEAWSR
		2981.4		2981.31	-0.0842	-28	150	177	SLMAAADLLASGYNYVT					Oxidation (M)[3]						Mascot
									DIAGGYEAWSR
		3011.47		3011.32	-0.1562	-52	90	115	YLDVRTPEEYSVGHAPG											Mascot
									AINIPYMYR
		3027.47		3027.3	-0.1709	-56	90	115	YLDVRTPEEYSVGHAPG					Oxidation (M)[24]						Mascot
									AINIPYMYR
		3137.5		3137.4	-0.0967	-31	149	177	RSLMAAADLLASGYNYV					Oxidation (M)[4]						Mascot
									TDIAGGYEAWSR
		3137.5		3137.4	-0.0967	-31	149	177	RSLMAAADLLASGYNYV					Oxidation (M)[4]						Mascot
									TDIAGGYEAWSR
	8	chloroplast ribulose-1,5-bisphosphate										ABK55670.1		13984.9	8.84		6	31	0
		carboxylase/oxygenase small subunit, partial [Cucumis
		sativus]
		Peptide Information
		Calc. Mass		Obsrv. Mass	± da	± ppm	Start	End	Sequence			Ion	C. I. %	Modification					Rank	Result Type
							Seq.	Seq.				Score
		914.4		914.392	-0.0081	-9	108	115	SPGYYDGR											Mascot
		914.4		914.392	-0.0081	-9	108	115	SPGYYDGR											Mascot
		937.562		937.556	-0.006	-6	53	60	VWPPLGLR											Mascot
		968.451		968.449	-0.0014	-1	79	85	ECDYLLR					Carbamidomethyl (C)[2]						Mascot
		2044.96		2044.96	0.0059	3	86	103	NGWVPCVEFDIGSGFVY											Mascot
									R
		2101.98		2101.94	-0.0386	-18	86	103	NGWVPCVEFDIGSGFVY					Carbamidomethyl (C)[6]						Mascot
									R
		2146.04		2145.95	-0.0826	-38	61	78	KFETLSYLPDMSNEQLSK					Oxidation (M)[11]						Mascot
		2937.37		2937.31	-0.0618	-21	79	103	ECDYLLRNGWVPCVEFD											Mascot
									IGSGFVYR
	9	hypothetical protein Csa_6G302120 [Cucumis sativus]										KGN47344.1		17162.8	9.91		6	30	0
		Protein Group
		PREDICTED: uncharacterized protein LOC101218723										XP_004148240.1		17162.8		9.9099
		[Cucumis sativus]														998474
																1211
		Peptide Information
		Calc. Mass		Obsrv. Mass	± da	± ppm	Start	End	Sequence			Ion	C. I. %	Modification					Rank	Result Type
							Seq.	Seq.				Score
		922.43		922.425	-0.0054	-6	140	147	VDVADTMR					Oxidation (M)[7]						Mascot
		927.454		927.483	0.0291	31	79	86	CFAKVGMR					Oxidation (M)[7]						Mascot
		968.48		968.449	-0.0312	-32	79	86	CFAKVGMR					Carbamidomethyl (C)[1]						Mascot
		1479.67		1479.77	0.1054	71	2	14	ASVCISNCINDAR					Carbamidomethyl (C)[4,8]						Mascot
		1569.68		1569.71	0.0331	21	1	14	MASVCISNCINDAR					Carbamidomethyl (C)[5], Oxidation (M)[1]						Mascot
		2937.51		2937.31	-0.1992	-68	2	26	ASVCISNCINDARLPVRP					Carbamidomethyl (C)[4,8]						Mascot
									TYINLYK
Project 1\Sample project20170120\R17064-3																				19	of	108
		3011.53		3011.32	-0.2107	-70	1	26	MASVCISNCINDARLPVR					Carbamidomethyl (C)[5]						Mascot
									PTYINLYK
		3027.52		3027.3	-0.2251	-74	1	26	MASVCISNCINDARLPVR					Carbamidomethyl (C)[5], Oxidation (M)[1]						Mascot
									PTYINLYK
	10	PREDICTED: DNA-directed RNA polymerases II and IV										XP_004148944.1		24467.9	9.38		7	30	0
		subunit 5A-like [Cucumis sativus]
		Protein Group
		PREDICTED: DNA-directed RNA polymerases II and IV										XP_011659238.1		24467.9		9.38
		subunit 5A-like [Cucumis sativus]														1144
																4092
		hypothetical protein Csa_7G374590 [Cucumis sativus]										KGN44717.1		24467.9		9.38
																1144
																4092
		Peptide Information
		Calc. Mass		Obsrv. Mass	± da	± ppm	Start	End	Sequence			Ion	C. I. %	Modification					Rank	Result Type
							Seq.	Seq.				Score
		927.391		927.483	0.092	99	112	120	ACMSEATSK											Mascot
		943.386		943.44	0.054	57	112	120	ACMSEATSK					Oxidation (M)[3]						Mascot
		1010.51		1010.49	-0.0233	-23	90	97	MKSENVFR											Mascot
		1491.82		1491.72	-0.099	-66	2	13	VLSEEEITRLFR											Mascot
		1722.95		1722.89	-0.0561	-33	164	178	ETQLPRIQVTDPVAR											Mascot
		1820.83		1820.87	0.0444	24	24	38	DRGYFVGDFEIDMTR											Mascot
		2044.96		2044.96	0.0034	2	61	77	RNDSSDQIYVFFPEEAK											Mascot
		2981.47		2981.31	-0.1601	-54	112	137	ACMSEATSKSFHLEVFQ					Carbamidomethyl (C)[2]						Mascot
									EAELLVNIK
		2981.47		2981.31	-0.1601	-54	112	137	ACMSEATSKSFHLEVFQ					Carbamidomethyl (C)[2]						Mascot
									EAELLVNIK
		2997.47		2997.31	-0.1548	-52	112	137	ACMSEATSKSFHLEVFQ					Carbamidomethyl (C)[2], Oxidation (M)[3]						Mascot
									EAELLVNIK
		2997.47		2997.31	-0.1548	-52	112	137	ACMSEATSKSFHLEVFQ					Carbamidomethyl (C)[2], Oxidation (M)[3]						Mascot
									EAELLVNIK
Project 1\Sample project20170120\R17064-3																				20	of	108
Gel Idx/Pos			259/K11						Instr./Gel Origin		BA2151/Sample Project 20170120					Process Status			Analysis Succeeded
Plate [#] Name			[1] Sample Project 20170120						Instrument Sample Name							Spectra			11
Rank		Protein Name						Species				Accession No.		Protein MW		Protein	Pep.	Protein	Protein	Total Ion	Total Ion
																PI	Count	Score	Score	Score	C. I. %
																			C. I. %
	1	hypothetical protein Csa_7G396430 [Cucumis sativus]										KGN44928.1		22556.6	4.45		13	234	100	162	100
		Protein Group
		PREDICTED: uncharacterized protein OsI_027940										XP_004136034.1		22556.6		4.4499
		[Cucumis sativus]														998092
																6514
		Peptide Information
		Calc. Mass		Obsrv. Mass	± da	± ppm	Start	End	Sequence			Ion	C. I. %	Modification					Rank	Result Type
							Seq.	Seq.				Score
		849.395		849.415	0.0198	23	193	201	GGVGSSEEK											Mascot
		852.469		852.407	-0.0614	-72	2	8	SRHPEVK											Mascot
		916.5		916.472	-0.0283	-31	9	15	WAQRLDK											Mascot
		977.49		977.433	-0.0567	-58	193	202	GGVGSSEEKK											Mascot
		999.504		999.481	-0.0227	-23	1	8	MSRHPEVK					Oxidation (M)[1]						Mascot
		1009.54		1009.52	-0.0157	-16	74	81	SIFCILEK					Carbamidomethyl (C)[4]						Mascot
		1009.54		1009.52	-0.0157	-16	74	81	SIFCILEK					Carbamidomethyl (C)[4]						Mascot
		1097.57		1097.56	-0.0131	-12	93	102	GDGKPPHYVK											Mascot
		1231.62		1231.59	-0.0231	-19	181	192	SGESAKPEGEIK											Mascot
		1246.7		1246.69	-0.0184	-15	16	26	VFITVQLPDSK											Mascot
		1246.7		1246.69	-0.0184	-15	16	26	VFITVQLPDSK			13	0							Mascot
		1479.84		1479.78	-0.0661	-45	90	102	LLRGDGKPPHYVK											Mascot
		1549.81		1549.76	-0.0498	-32	55	67	LELFDKVNVEESK											Mascot
		2657.12		2657.05	-0.072	-27	108	132	WVDEDEDDGTAGLGDLD											Mascot
									LGGMDFSK
		2657.12		2657.05	-0.072	-27	108	132	WVDEDEDDGTAGLGDLD											Mascot
									LGGMDFSK
		2673.11		2673.04	-0.0779	-29	108	132	WVDEDEDDGTAGLGDLD					Oxidation (M)[21]						Mascot
									LGGMDFSK
		2734.27		2734.22	-0.0515	-19	30	54	VNLEPDGVFTFSGSAGS											Mascot
									ENHHYELK
		2734.27		2734.22	-0.0515	-19	30	54	VNLEPDGVFTFSGSAGS			149	100							Mascot
									ENHHYELK
	2	PREDICTED: cytochrome P450 81E8-like [Cucumis										XP_004141398.1		59076.6	8.05		13	36	0
		sativus]
		Peptide Information
							Start	End				Ion
Project 1\Sample project20170120\R17064-3		Calc. Mass		Obsrv. Mass	± da	± ppm			Sequence				C. I. %	Modification					Rank	21	Result Type	of	108
							Seq.	Seq.				Score
		843.426		843.481	0.0554	66	408	413	FWTHPR											Mascot
		950.505		950.415	-0.0908	-96	52	59	ALYNISNR											Mascot
		958.478		958.415	-0.0623	-65	441	450	GCPGEGLGLR											Mascot
		977.472		977.433	-0.0389	-40	160	167	ENQVVNMK					Oxidation (M)[7]						Mascot
		1097.46		1097.56	0.1006	92	344	352	LMEESDMAR					Oxidation (M)[2]						Mascot
		1253.56		1253.59	0.0293	23	343	352	RLMEESDMAR					Oxidation (M)[3]						Mascot
		1281.69		1281.61	-0.0817	-64	430	440	FNLMAFGLGRR											Mascot
		1427.78		1427.8	0.0223	16	126	137	RICTVEILSTHR											Mascot
		1440.73		1440.78	0.0522	36	245	256	DALMQSLIEQHR											Mascot
		1654.84		1654.74	-0.1029	-62	168	180	HVFFDLSFNLMLR					Oxidation (M)[11]						Mascot
		2298.22		2298.16	-0.0573	-25	493	512	CRPRPMVVDILSQTKSSP					Carbamidomethyl (C)[1]						Mascot
									AR
		2717.37		2717.24	-0.126	-46	392	413	GTMLYINIWAIQNDPKFW					Oxidation (M)[3]						Mascot
									THPR
		2748.38		2748.24	-0.1392	-51	274	296	TLIEVLLELQESEPEQYTD											Mascot
									ETIR
	3	hypothetical protein Csa_3G807310 [Cucumis sativus]										KGN59301.1		15467.5	11.1		7	36	0
		Protein Group
		PREDICTED: uncharacterized protein LOC101222384										XP_004136571.1		15467.5		11.1
		[Cucumis sativus]														381
																4697
		Peptide Information
		Calc. Mass		Obsrv. Mass	± da	± ppm	Start	End	Sequence			Ion	C. I. %	Modification					Rank	Result Type
							Seq.	Seq.				Score
		815.499		815.504	0.005	6	131	137	RLISDIV											Mascot
		927.541		927.487	-0.0543	-59	67	74	WLISPVGR											Mascot
		947.516		947.576	0.0608	64	15	22	SSDELLRK											Mascot
		1152.53		1152.56	0.0274	24	23	34	FAEVGSESGGGR											Mascot
		1439.71		1439.8	0.0915	64	1	13	MDSSIGNVQHVPR											Mascot
		1567.8		1567.72	-0.0788	-50	1	14	MDSSIGNVQHVPRK											Mascot
		2224.99		2225.07	0.0813	37	46	65	RVNNEEYCDSPSGTGGV					Carbamidomethyl (C)[8]						Mascot
									VER
	4	hypothetical protein Csa_4G642310 [Cucumis sativus]										KGN55250.1		59914.9	8.05		13	34	0
		Peptide Information
		Calc. Mass		Obsrv. Mass	± da	± ppm	Start	End	Sequence			Ion	C. I. %	Modification					Rank	Result Type
							Seq.	Seq.				Score
Project 1\Sample project20170120\R17064-3																				22	of	108
		843.426		843.481	0.0554	66	416	421	FWTHPR											Mascot
		950.505		950.415	-0.0908	-96	60	67	ALYNISNR											Mascot
		958.478		958.415	-0.0623	-65	449	458	GCPGEGLGLR											Mascot
		977.472		977.433	-0.0389	-40	168	175	ENQVVNMK					Oxidation (M)[7]						Mascot
		1097.46		1097.56	0.1006	92	352	360	LMEESDMAR					Oxidation (M)[2]						Mascot
		1253.56		1253.59	0.0293	23	351	360	RLMEESDMAR					Oxidation (M)[3]						Mascot
		1281.69		1281.61	-0.0817	-64	438	448	FNLMAFGLGRR											Mascot
		1427.78		1427.8	0.0223	16	134	145	RICTVEILSTHR											Mascot
		1440.73		1440.78	0.0522	36	253	264	DALMQSLIEQHR											Mascot
		1654.84		1654.74	-0.1029	-62	176	188	HVFFDLSFNLMLR					Oxidation (M)[11]						Mascot
		2298.22		2298.16	-0.0573	-25	501	520	CRPRPMVVDILSQTKSSP					Carbamidomethyl (C)[1]						Mascot
									AR
		2717.37		2717.24	-0.126	-46	400	421	GTMLYINIWAIQNDPKFW					Oxidation (M)[3]						Mascot
									THPR
		2748.38		2748.24	-0.1392	-51	282	304	TLIEVLLELQESEPEQYTD											Mascot
									ETIR
	5	hypothetical protein Csa_4G006220 [Cucumis sativus]										KGN52915.1		98201.4	6.79		15	33	0
		Peptide Information
		Calc. Mass		Obsrv. Mass	± da	± ppm	Start	End	Sequence			Ion	C. I. %	Modification					Rank	Result Type
							Seq.	Seq.				Score
		815.452		815.504	0.0512	63	682	688	FGVHSIR											Mascot
		916.525		916.472	-0.0535	-58	44	51	LQLFGPNK											Mascot
		927.562		927.487	-0.0753	-81	441	449	ALNLGVNVK											Mascot
		1009.62		1009.52	-0.0923	-91	860	867	LRELHTLK											Mascot
		1009.62		1009.52	-0.0923	-91	860	867	LRELHTLK											Mascot
		1031.58		1031.52	-0.0615	-60	395	403	GLRSLAVCR					Carbamidomethyl (C)[8]						Mascot
		1253.69		1253.59	-0.0982	-78	636	646	VKPSPLPDSWK											Mascot
		1427.79		1427.8	0.0158	11	293	305	DVDKDNLVLLGAR											Mascot
		1429.73		1429.68	-0.05	-35	540	554	ADIGIAVADATDAAR											Mascot
		1513.77		1513.7	-0.0706	-47	365	377	GAPEQIIELCDLR					Carbamidomethyl (C)[10]						Mascot
		2015.89		2015.94	0.0532	26	254	271	RMTAIEEMAGMDVLCSD					Oxidation (M)[2]						Mascot
									K
		2043		2042.93	-0.0741	-36	465	483	RLGMGTNMYPSSSLLGQ					Oxidation (M)[4]						Mascot
									SK
		2298.29		2298.16	-0.1318	-57	555	577	GASDIVLTEPGLSVIISAV											Mascot
									LTSR
		2401.15		2401.23	0.0815	34	309	330	VENQDAIDACIVGMLGDP					Carbamidomethyl (C)[10]						Mascot
									KEAR
		2720.25		2720.21	-0.0442	-16	255	279	MTAIEEMAGMDVLCSDK					Oxidation (M)[1,7,10]						Mascot
									TGTLTLNK
		3337.7		3337.63	-0.0684	-20	180	209	VLTAIGNFCICSIAMGMVI					Oxidation (M)[15]						Mascot
									EIVVMYPIQHR
	6	hypothetical protein Csa_3G710870 [Cucumis sativus]										KGN58660.1		34476.3	8.83		9	33	0
Project 1\Sample project20170120\R17064-3																				23	of	108
		Peptide Information
		Calc. Mass		Obsrv. Mass	± da	± ppm	Start	End	Sequence			Ion	C. I. %	Modification					Rank	Result Type
							Seq.	Seq.				Score
		843.541		843.481	-0.0597	-71	143	149	ITRVQVK											Mascot
		1119.49		1119.51	0.0205	18	81	89	GHLMEQMNK					Oxidation (M)[4,7]						Mascot
		1152.52		1152.56	0.0378	33	185	194	CSFAPSCPVK					Carbamidomethyl (C)[1,7]						Mascot
		1265.59		1265.6	0.0044	3	46	56	EETGALMEELK					Oxidation (M)[7]						Mascot
		1941.02		1940.87	-0.1491	-77	297	315	DPNFTAALAAAISGKIFPH											Mascot
		2043.02		2042.93	-0.0992	-49	64	80	KLTEMLTVVCENYNTLR					Oxidation (M)[5]						Mascot
		2298.13		2298.16	0.0274	12	277	296	FDSPELQQFLVEQMASS											Mascot
									LTK
		2678.39		2678.16	-0.2226	-83	1	24	MAAFSSWLLDSVDTKLD											Mascot
									LNSVPLR
		3337.38		3337.63	0.2502	75	103	133	SESSNNNNNMAGMNGN											Mascot
									SESSSTDEESYKKPK
	7	PREDICTED: ATPase 9, plasma membrane-type										XP_004152192.1		104636	6.07		15	31	0
		[Cucumis sativus]
		Peptide Information
		Calc. Mass		Obsrv. Mass	± da	± ppm	Start	End	Sequence			Ion	C. I. %	Modification					Rank	Result Type
							Seq.	Seq.				Score
		815.452		815.504	0.0512	63	743	749	FGVHSIR											Mascot
		916.525		916.472	-0.0535	-58	44	51	LQLFGPNK											Mascot
		927.562		927.487	-0.0753	-81	502	510	ALNLGVNVK											Mascot
		1009.62		1009.52	-0.0923	-91	921	928	LRELHTLK											Mascot
		1009.62		1009.52	-0.0923	-91	921	928	LRELHTLK											Mascot
		1031.58		1031.52	-0.0615	-60	456	464	GLRSLAVCR					Carbamidomethyl (C)[8]						Mascot
		1253.69		1253.59	-0.0982	-78	697	707	VKPSPLPDSWK											Mascot
		1427.79		1427.8	0.0158	11	354	366	DVDKDNLVLLGAR											Mascot
		1429.73		1429.68	-0.05	-35	601	615	ADIGIAVADATDAAR											Mascot
		1513.77		1513.7	-0.0706	-47	426	438	GAPEQIIELCDLR					Carbamidomethyl (C)[10]						Mascot
		2015.89		2015.94	0.0532	26	315	332	RMTAIEEMAGMDVLCSD					Oxidation (M)[2]						Mascot
									K
		2043		2042.93	-0.0741	-36	526	544	RLGMGTNMYPSSSLLGQ					Oxidation (M)[4]						Mascot
									SK
		2298.29		2298.16	-0.1318	-57	616	638	GASDIVLTEPGLSVIISAV											Mascot
									LTSR
		2401.15		2401.23	0.0815	34	370	391	VENQDAIDACIVGMLGDP					Carbamidomethyl (C)[10]						Mascot
									KEAR
		2720.25		2720.21	-0.0442	-16	316	340	MTAIEEMAGMDVLCSDK					Oxidation (M)[1,7,10]						Mascot
									TGTLTLNK
		3337.7		3337.63	-0.0684	-20	241	270	VLTAIGNFCICSIAMGMVI					Oxidation (M)[15]						Mascot
									EIVVMYPIQHR
Project 1\Sample project20170120\R17064-3																				24	of	108
	8	hypothetical protein Csa_4G312300 [Cucumis sativus]										KGN54397.1		37763.7	7.08		10	30	0
		Peptide Information
		Calc. Mass		Obsrv. Mass	± da	± ppm	Start	End	Sequence			Ion	C. I. %	Modification					Rank	Result Type
							Seq.	Seq.				Score
		903.464		903.553	0.0891	99	298	304	EREISNR											Mascot
		950.451		950.415	-0.0366	-39	116	122	SHLQMYR					Oxidation (M)[5]						Mascot
		1014.52		1014.51	-0.0144	-14	89	98	LGGQENATPK											Mascot
		1031.49		1031.52	0.0225	22	213	221	SNAPEMINR											Mascot
		1268.67		1268.67	0.001	1	312	321	MQLQHEELLK											Mascot
		1281.56		1281.61	0.0505	39	1	11	MEVVGECSNTR					Carbamidomethyl (C)[7]						Mascot
		1427.72		1427.8	0.0773	54	125	137	KTNEPGQVVGDQR											Mascot
		1440.76		1440.78	0.0158	11	311	321	RMQLQHEELLK					Oxidation (M)[2]						Mascot
		1940.8		1940.87	0.0712	37	284	299	SIDQDEESAMEEEKER					Oxidation (M)[10]						Mascot
		2796.36		2796.17	-0.1843	-66	138	161	VLMAESNNGDRNIFNVS					Oxidation (M)[3]						Mascot
									QIPMFQR
	9	hypothetical protein Csa_3G775250 [Cucumis sativus]										KGN59112.1		65338.9	6.62		11	28	0
		Protein Group
		PREDICTED: uncharacterized protein LOC101210869										XP_004149228.1		65338.9		6.6199
		[Cucumis sativus]														998855
																5908
		Peptide Information
		Calc. Mass		Obsrv. Mass	± da	± ppm	Start	End	Sequence			Ion	C. I. %	Modification					Rank	Result Type
							Seq.	Seq.				Score
		801.472		801.42	-0.0512	-64	449	455	LEALDIK											Mascot
		808.456		808.388	-0.0688	-85	350	356	LYAGEKK											Mascot
		836.463		836.41	-0.0523	-63	349	355	RLYAGEK											Mascot
		838.46		838.411	-0.0491	-59	84	89	LQKMYR											Mascot
		843.447		843.481	0.0343	41	165	170	VYRSYR											Mascot
		1152.6		1152.56	-0.0453	-39	324	333	QSGTFLDTKR											Mascot
		1513.82		1513.7	-0.1247	-82	72	86	DGGDDLGLAALKLQK											Mascot
		2233.13		2233.06	-0.0725	-32	456	478	TIEEVGGADISSKSAQISQ											Mascot
									AGGK
		2284.13		2284.09	-0.0376	-16	269	288	AGQPFFYWLDVGEGKDV											Mascot
									DLK
		2663.23		2663.24	0.0073	3	566	589	MVAFPTPTTPTAKDIFNA					Oxidation (M)[1]						Mascot
									DDSFNF
		2796.44		2796.17	-0.2715	-97	358	385	GAFHHSSFLAGGATLAA											Mascot
									GRLEVDDGVLK
	10	hypothetical protein Csa_6G062315 [Cucumis sativus]										KGN46172.1		22281.6	9.97		7	28	0
Project 1\Sample project20170120\R17064-3																				25	of	108
		Protein Group
		PREDICTED: uncharacterized protein LOC101217755										XP_004144965.1		22281.6		9.97
		[Cucumis sativus]														2670
																2881
		Peptide Information
		Calc. Mass		Obsrv. Mass	± da	± ppm	Start	End	Sequence			Ion	C. I. %	Modification					Rank	Result Type
							Seq.	Seq.				Score
		836.418		836.41	-0.008	-10	88	94	NSLVMEK					Oxidation (M)[5]						Mascot
		1097.51		1097.56	0.0465	42	78	87	SSSDDLKAMK					Oxidation (M)[9]						Mascot
		1418.8		1418.68	-0.1199	-85	88	99	NSLVMEKVTILR					Oxidation (M)[5]						Mascot
		1654.85		1654.74	-0.1126	-68	179	193	HVSAIVDDSATRDLR											Mascot
		2043.08		2042.93	-0.158	-77	1	17	MGTEILRPQDCLIERIR											Mascot
		2193.94		2194.02	0.082	37	27	44	RSSYGNYDSNICNNYNP					Carbamidomethyl (C)[12]						Mascot
									R
		2298.14		2298.16	0.0203	9	116	137	EGDNIVVCGTDRLGPAP					Carbamidomethyl (C)[8]						Mascot
									ETVAK
Project 1\Sample project20170120\R17064-3																				26	of	108
Gel Idx/Pos			260/K12						Instr./Gel Origin		BA2151/Sample Project 20170120					Process Status			Analysis Succeeded
Plate [#] Name			[1] Sample Project 20170120						Instrument Sample Name							Spectra			11
Rank		Protein Name						Species				Accession No.		Protein MW		Protein	Pep.	Protein	Protein	Total Ion	Total Ion
																PI	Count	Score	Score	Score	C. I. %
																			C. I. %
	1	hypothetical protein Csa_1G479610 [Cucumis sativus]										KGN65655.1		27377.8	5.43		17	595	100	474	100
		Protein Group
		L-ascorbate peroxidase, cytosolic-like [Cucumis sativus]										NP_001267635.1		27377.8		5.4299
																998283
																3862
		ascorbate peroxidase, partial [Cucumis sativus]										AAQ88015.1		27343.8		5.4299
																998283
																3862
		cytosolic ascorbate peroxidase [Cucumis sativus]										BAA13671.1		27377.8		5.4299
																998283
																3862
		unnamed protein product [Cucumis sativus]										CBC89222.1		27377.8		5.4299
																998283
																3862
		unnamed protein product [Cucumis sativus]										CBD24439.1		27377.8		5.4299
																998283
																3862
		unnamed protein product [Cucumis sativus]										CBC70072.1		27377.8		5.4299
																998283
																3862
		unnamed protein product [Cucumis sativus]										CBB98557.1		27377.8		5.4299
																998283
																3862
		unnamed protein product [Cucumis sativus]										CAW75806.1		27377.8		5.4299
																998283
																3862
		unnamed protein product [Cucumis sativus]										CAW86407.1		27377.8		5.4299
																998283
																3862
Project 1\Sample project20170120\R17064-3																				27	of	108
		unnamed protein product [Cucumis sativus]										CAW32442.1		27377.8		5.4299
																998283
																3862
		Peptide Information
		Calc. Mass		Obsrv. Mass	± da	± ppm	Start	End	Sequence			Ion	C. I. %	Modification					Rank	Result Type
							Seq.	Seq.				Score
		923.44		923.441	0.0009	1	53	61	TGGPFGTMR											Mascot
		939.435		939.433	-0.0027	-3	53	61	TGGPFGTMR					Oxidation (M)[8]						Mascot
		974.491		974.493	0.0021	2	31	38	NCAPLMLR					Carbamidomethyl (C)[2]						Mascot
		990.486		990.484	-0.0015	-2	31	38	NCAPLMLR					Carbamidomethyl (C)[2], Oxidation (M)[6]						Mascot
		1073.58		1073.56	-0.0223	-21	199	208	EGLLQLASDK											Mascot
		1220.59		1220.59	0.0033	3	39	49	LAWHSAGTFCK											Mascot
		1250.6		1250.6	-0.0042	-3	120	130	EDKPEPPPEGR											Mascot
		1277.61		1277.6	-0.005	-4	39	49	LAWHSAGTFCK					Carbamidomethyl (C)[10]						Mascot
		1287.65		1287.63	-0.0132	-10	188	198	SYFTELLTGEK											Mascot
		1287.65		1287.63	-0.0132	-10	188	198	SYFTELLTGEK			51	99.893							Mascot
		1309.69		1309.61	-0.0743	-57	131	142	LPDATKGSDHLR											Mascot
		1344.61		1344.62	0.001	1	4	14	CYPVVSEEYQK											Mascot
		1401.64		1401.61	-0.0272	-19	4	14	CYPVVSEEYQK					Carbamidomethyl (C)[1]						Mascot
		1550.74		1550.75	0.0124	8	39	52	LAWHSAGTFCKDSK											Mascot
		1562.82		1562.74	-0.0803	-51	25	38	GFIAEKNCAPLMLR											Mascot
		1578.81		1578.72	-0.0924	-59	25	38	GFIAEKNCAPLMLR					Oxidation (M)[12]						Mascot
		1583.92		1583.91	-0.0103	-7	209	222	ALLSDPVFRPLVEK											Mascot
		1583.92		1583.91	-0.0103	-7	209	222	ALLSDPVFRPLVEK			38	97.586							Mascot
		1619.84		1619.84	-0.001	-1	25	38	GFIAEKNCAPLMLR					Carbamidomethyl (C)[8]						Mascot
		1619.84		1619.84	-0.001	-1	25	38	GFIAEKNCAPLMLR					Carbamidomethyl (C)[8]						Mascot
		1636.84		1636.83	-0.0078	-5	64	79	SELAHGANNGLDIAVR											Mascot
		1636.84		1636.83	-0.0078	-5	64	79	SELAHGANNGLDIAVR			29	80.999							Mascot
		1808.89		1808.86	-0.023	-13	172	187	SGFEGPWTTNPLIFDK											Mascot
		1808.89		1808.86	-0.023	-13	172	187	SGFEGPWTTNPLIFDK			81	100							Mascot
		1912		1911.98	-0.0206	-11	62	79	FKSELAHGANNGLDIAVR											Mascot
		2061.88		2061.86	-0.0213	-10	223	240	YAADEDAFFADYAEAHQ											Mascot
									K
		2061.88		2061.86	-0.0213	-10	223	240	YAADEDAFFADYAEAHQ			144	100							Mascot
									K
		2552.25		2552.23	-0.0132	-5	143	166	DVFYTMGLSDQDIVALSG											Mascot
									GHTLGR
		2552.25		2552.23	-0.0132	-5	143	166	DVFYTMGLSDQDIVALSG			132	100							Mascot
Project 1\Sample project20170120\R17064-3				2552.23																28	Mascot	of	108
									GHTLGR
		2568.24		2568.21	-0.0281	-11	143	166	DVFYTMGLSDQDIVALSG					Oxidation (M)[6]						Mascot
									GHTLGR
		3675.85		3675.84	-0.0093	-3	86	119	EQFPILSYADFYQLAGVV											Mascot
									AVEVTGGPDVPFHPGR
	2	ascorbate peroxidase [Cucumis sativus]										ACO90193.1		27391.8	5.44		16	581	100	474	100
		Protein Group
		ascorbate peroxidase [Cucumis sativus]										AGJ72850.1		27375.8		5.44
																572
																2046
		Peptide Information
		Calc. Mass		Obsrv. Mass	± da	± ppm	Start	End	Sequence			Ion	C. I. %	Modification					Rank	Result Type
							Seq.	Seq.				Score
		923.44		923.441	0.0009	1	53	61	TGGPFGTMR											Mascot
		939.435		939.433	-0.0027	-3	53	61	TGGPFGTMR					Oxidation (M)[8]						Mascot
		974.491		974.493	0.0021	2	31	38	NCAPLMLR					Carbamidomethyl (C)[2]						Mascot
		990.486		990.484	-0.0015	-2	31	38	NCAPLMLR					Carbamidomethyl (C)[2], Oxidation (M)[6]						Mascot
		1073.58		1073.56	-0.0223	-21	199	208	EGLLQLASDK											Mascot
		1220.59		1220.59	0.0033	3	39	49	LAWHSAGTFCK											Mascot
		1250.6		1250.6	-0.0042	-3	120	130	EDKPEPPPEGR											Mascot
		1277.61		1277.6	-0.005	-4	39	49	LAWHSAGTFCK					Carbamidomethyl (C)[10]						Mascot
		1287.65		1287.63	-0.0132	-10	188	198	SYFTELLTGEK											Mascot
		1287.65		1287.63	-0.0132	-10	188	198	SYFTELLTGEK			51	99.893							Mascot
		1309.69		1309.61	-0.0743	-57	131	142	LPDATKGSDHLR											Mascot
		1344.61		1344.62	0.001	1	4	14	CYPVVSEEYQK											Mascot
		1401.64		1401.61	-0.0272	-19	4	14	CYPVVSEEYQK					Carbamidomethyl (C)[1]						Mascot
		1550.74		1550.75	0.0124	8	39	52	LAWHSAGTFCKDSK											Mascot
		1562.82		1562.74	-0.0803	-51	25	38	GFIAEKNCAPLMLR											Mascot
		1578.81		1578.72	-0.0924	-59	25	38	GFIAEKNCAPLMLR					Oxidation (M)[12]						Mascot
		1583.92		1583.91	-0.0103	-7	209	222	ALLSDPVFRPLVEK											Mascot
		1583.92		1583.91	-0.0103	-7	209	222	ALLSDPVFRPLVEK			38	97.586							Mascot
		1619.84		1619.84	-0.001	-1	25	38	GFIAEKNCAPLMLR					Carbamidomethyl (C)[8]						Mascot
		1619.84		1619.84	-0.001	-1	25	38	GFIAEKNCAPLMLR					Carbamidomethyl (C)[8]						Mascot
		1636.84		1636.83	-0.0078	-5	64	79	SELAHGANNGLDIAVR											Mascot
		1636.84		1636.83	-0.0078	-5	64	79	SELAHGANNGLDIAVR			29	80.999							Mascot
		1808.89		1808.86	-0.023	-13	172	187	SGFEGPWTTNPLIFDK											Mascot
		1808.89		1808.86	-0.023	-13	172	187	SGFEGPWTTNPLIFDK			81	100							Mascot
		1912		1911.98	-0.0206	-11	62	79	FKSELAHGANNGLDIAVR											Mascot
Project 1\Sample project20170120\R17064-3				1911.98																29	Mascot	of	108
		2061.88		2061.86	-0.0213	-10	223	240	YAADEDAFFADYAEAHQ											Mascot
									K
		2061.88		2061.86	-0.0213	-10	223	240	YAADEDAFFADYAEAHQ			144	100							Mascot
									K
		2552.25		2552.23	-0.0132	-5	143	166	DVFYTMGLSDQDIVALSG											Mascot
									GHTLGR
		2552.25		2552.23	-0.0132	-5	143	166	DVFYTMGLSDQDIVALSG			132	100							Mascot
									GHTLGR
		2568.24		2568.21	-0.0281	-11	143	166	DVFYTMGLSDQDIVALSG					Oxidation (M)[6]						Mascot
									GHTLGR
	3	ascorbate peroxidase [Cucumis sativus]										ADT80721.1		27378.8	5.32		16	503	100	393	100
		Peptide Information
		Calc. Mass		Obsrv. Mass	± da	± ppm	Start	End	Sequence			Ion	C. I. %	Modification					Rank	Result Type
							Seq.	Seq.				Score
		923.44		923.441	0.0009	1	53	61	TGGPFGTMR											Mascot
		939.435		939.433	-0.0027	-3	53	61	TGGPFGTMR					Oxidation (M)[8]						Mascot
		974.491		974.493	0.0021	2	31	38	NCAPLMLR					Carbamidomethyl (C)[2]						Mascot
		990.486		990.484	-0.0015	-2	31	38	NCAPLMLR					Carbamidomethyl (C)[2], Oxidation (M)[6]						Mascot
		1073.58		1073.56	-0.0223	-21	199	208	EGLLQLASDK											Mascot
		1220.59		1220.59	0.0033	3	39	49	LAWHSAGTFCK											Mascot
		1250.6		1250.6	-0.0042	-3	120	130	EDKPEPPPEGR											Mascot
		1277.61		1277.6	-0.005	-4	39	49	LAWHSAGTFCK					Carbamidomethyl (C)[10]						Mascot
		1287.65		1287.63	-0.0132	-10	188	198	SYFTELLTGEK											Mascot
		1287.65		1287.63	-0.0132	-10	188	198	SYFTELLTGEK			51	99.893							Mascot
		1309.69		1309.61	-0.0743	-57	131	142	LPDATKGSDHLR											Mascot
		1344.61		1344.62	0.001	1	4	14	CYPVVSEEYQK											Mascot
		1401.64		1401.61	-0.0272	-19	4	14	CYPVVSEEYQK					Carbamidomethyl (C)[1]						Mascot
		1550.74		1550.75	0.0124	8	39	52	LAWHSAGTFCKDSK											Mascot
		1562.82		1562.74	-0.0803	-51	25	38	GFIAEKNCAPLMLR											Mascot
		1578.81		1578.72	-0.0924	-59	25	38	GFIAEKNCAPLMLR					Oxidation (M)[12]						Mascot
		1583.92		1583.91	-0.0103	-7	209	222	ALLSDPVFRPLVEK											Mascot
		1583.92		1583.91	-0.0103	-7	209	222	ALLSDPVFRPLVEK			38	97.586							Mascot
		1619.84		1619.84	-0.001	-1	25	38	GFIAEKNCAPLMLR					Carbamidomethyl (C)[8]						Mascot
		1619.84		1619.84	-0.001	-1	25	38	GFIAEKNCAPLMLR					Carbamidomethyl (C)[8]						Mascot
		1636.84		1636.83	-0.0078	-5	64	79	SELAHGANNGLDIAVR											Mascot
		1636.84		1636.83	-0.0078	-5	64	79	SELAHGANNGLDIAVR			29	80.999							Mascot
		1912		1911.98	-0.0206	-11	62	79	FKSELAHGANNGLDIAVR											Mascot
		2061.88		2061.86	-0.0213	-10	223	240	YAADEDAFFADYAEAHQ											Mascot
									K
		2061.88		2061.86	-0.0213	-10	223	240	YAADEDAFFADYAEAHQ			144	100							Mascot
									K
Project 1\Sample project20170120\R17064-3																				30	of	108
		2552.25		2552.23	-0.0132	-5	143	166	DVFYTMGLSDQDIVALSG											Mascot
									GHTLGR
		2552.25		2552.23	-0.0132	-5	143	166	DVFYTMGLSDQDIVALSG			132	100							Mascot
									GHTLGR
		2568.24		2568.21	-0.0281	-11	143	166	DVFYTMGLSDQDIVALSG					Oxidation (M)[6]						Mascot
									GHTLGR
		3675.85		3675.84	-0.0093	-3	86	119	EQFPILSYADFYQLAGVV											Mascot
									AVEVTGGPDVPFHPGR
	4	hypothetical protein Csa_4G598000 [Cucumis sativus]										KGN54918.1		27274.2	5.61		16	259	100	152	100
		Protein Group
		PREDICTED: triosephosphate isomerase, cytosolic										XP_004144643.1		27274.2		5.61
		[Cucumis sativus]														1335
																144
		Peptide Information
		Calc. Mass		Obsrv. Mass	± da	± ppm	Start	End	Sequence			Ion	C. I. %	Modification					Rank	Result Type
							Seq.	Seq.				Score
		948.54		948.525	-0.015	-16	239	246	AEFIDIIK											Mascot
		954.483		954.48	-0.0036	-4	5	12	FFVGGNWK											Mascot
		1024.46		1024.46	-0.0025	-2	105	113	ESNEFVGDK											Mascot
		1049.6		1049.58	-0.023	-22	114	123	VAYALSQGIK											Mascot
		1374.7		1374.7	-0.0045	-3	124	135	VIACVGETLEQR					Carbamidomethyl (C)[4]						Mascot
		1374.7		1374.7	-0.0045	-3	124	135	VIACVGETLEQR			28	76.784	Carbamidomethyl (C)[4]						Mascot
		1419.73		1419.7	-0.0292	-21	136	149	ESGSTIEVVAAQTK											Mascot
		1546.74		1546.74	-0.0037	-2	58	70	SDIQVAAQNCWVR					Carbamidomethyl (C)[10]						Mascot
		1546.74		1546.74	-0.0037	-2	58	70	SDIQVAAQNCWVR			60	99.985	Carbamidomethyl (C)[10]						Mascot
		1619.85		1619.84	-0.0114	-7	176	190	VATPAQAQEVHAELR											Mascot
		1619.85		1619.84	-0.0114	-7	176	190	VATPAQAQEVHAELR			27	69.816							Mascot
		1663.82		1663.81	-0.005	-3	192	206	WFQNNVSAEVAGSVR											Mascot
		1663.82		1663.81	-0.005	-3	192	206	WFQNNVSAEVAGSVR			38	97.878							Mascot
		1747.94		1747.93	-0.0186	-11	176	191	VATPAQAQEVHAELRK											Mascot
		1791.91		1791.89	-0.0193	-11	191	206	KWFQNNVSAEVAGSVR											Mascot
		1901		1900.97	-0.0326	-17	220	238	ELAAQPDLDGFLVGGAS											Mascot
									LK
		2332.2		2332.15	-0.0481	-21	155	175	ISNWDNVVLAYEPVWAIG											Mascot
									TGK
		2939.51		2939.49	-0.0173	-6	72	99	GGAFTGEVSAEMLVNLGI											Mascot
									PWVILGHSER
		3067.6		3067.6	-0.0078	-3	71	99	KGGAFTGEVSAEMLVNL											Mascot
									GIPWVILGHSER
		3083.6		3083.57	-0.0276	-9	71	99	KGGAFTGEVSAEMLVNL					Oxidation (M)[13]						Mascot
									GIPWVILGHSER
		3327.8		3327.76	-0.0415	-12	23	53	IVSTLNEAEIPSEDAVEVV											Mascot
									VSPPFVFLSLVK
Project 1\Sample project20170120\R17064-3																				31	of	108
	5	cytosolic ascorbate peroxidase, partial [Cucumis										ABK55683.1		16952.6	6.48		11	103	100	29	80.999
		sativus]
		Peptide Information
		Calc. Mass		Obsrv. Mass	± da	± ppm	Start	End	Sequence			Ion	C. I. %	Modification					Rank	Result Type
							Seq.	Seq.				Score
		923.44		923.441	0.0009	1	52	60	TGGPFGTMR											Mascot
		939.435		939.433	-0.0027	-3	52	60	TGGPFGTMR					Oxidation (M)[8]						Mascot
		974.491		974.493	0.0021	2	30	37	NCAPLMLR					Carbamidomethyl (C)[2]						Mascot
		990.486		990.484	-0.0015	-2	30	37	NCAPLMLR					Carbamidomethyl (C)[2], Oxidation (M)[6]						Mascot
		1220.59		1220.59	0.0033	3	38	48	LAWHSAGTFCK											Mascot
		1250.6		1250.6	-0.0042	-3	119	129	EDKPEPPPEGR											Mascot
		1277.61		1277.6	-0.005	-4	38	48	LAWHSAGTFCK					Carbamidomethyl (C)[10]						Mascot
		1309.69		1309.61	-0.0743	-57	130	141	LPDATKGSDHLR											Mascot
		1344.61		1344.62	0.001	1	3	13	CYPVVSEEYQK											Mascot
		1401.64		1401.61	-0.0272	-19	3	13	CYPVVSEEYQK					Carbamidomethyl (C)[1]						Mascot
		1550.74		1550.75	0.0124	8	38	51	LAWHSAGTFCKDSK											Mascot
		1562.82		1562.74	-0.0803	-51	24	37	GFIAEKNCAPLMLR											Mascot
		1578.81		1578.72	-0.0924	-59	24	37	GFIAEKNCAPLMLR					Oxidation (M)[12]						Mascot
		1619.84		1619.84	-0.001	-1	24	37	GFIAEKNCAPLMLR					Carbamidomethyl (C)[8]						Mascot
		1619.84		1619.84	-0.001	-1	24	37	GFIAEKNCAPLMLR					Carbamidomethyl (C)[8]						Mascot
		1636.84		1636.83	-0.0078	-5	63	78	SELAHGANNGLDIAVR											Mascot
		1636.84		1636.83	-0.0078	-5	63	78	SELAHGANNGLDIAVR			29	80.999							Mascot
		1912		1911.98	-0.0206	-11	61	78	FKSELAHGANNGLDIAVR											Mascot
		3675.85		3675.84	-0.0093	-3	85	118	EQFPILSYADFYQLAGVV											Mascot
									AVEVTGGPDVPFHPGR
	6	ascorbate peroxidase, partial [Cucumis sativus]										ABO09822.1		17473.8	6.23		10	87	99.99	29	80.999
		Peptide Information
		Calc. Mass		Obsrv. Mass	± da	± ppm	Start	End	Sequence			Ion	C. I. %	Modification					Rank	Result Type
							Seq.	Seq.				Score
		923.44		923.441	0.0009	1	50	58	TGGPFGTMR											Mascot
		939.435		939.433	-0.0027	-3	50	58	TGGPFGTMR					Oxidation (M)[8]						Mascot
		974.491		974.493	0.0021	2	28	35	NCAPLMLR					Carbamidomethyl (C)[2]						Mascot
		990.486		990.484	-0.0015	-2	28	35	NCAPLMLR					Carbamidomethyl (C)[2], Oxidation (M)[6]						Mascot
		1220.59		1220.59	0.0033	3	36	46	LAWHSAGTFCK											Mascot
		1250.6		1250.6	-0.0042	-3	117	127	EDKPEPPPEGR											Mascot
		1277.61		1277.6	-0.005	-4	36	46	LAWHSAGTFCK					Carbamidomethyl (C)[10]						Mascot
Project 1\Sample project20170120\R17064-3																				32	of	108
		1309.69		1309.61	-0.0743	-57	128	139	LPDATKGSDHLR											Mascot
		1344.61		1344.62	0.001	1	1	11	CYPVVSEEYQK											Mascot
		1401.64		1401.61	-0.0272	-19	1	11	CYPVVSEEYQK					Carbamidomethyl (C)[1]						Mascot
		1550.74		1550.75	0.0124	8	36	49	LAWHSAGTFCKDSK											Mascot
		1562.82		1562.74	-0.0803	-51	22	35	GFIAEKNCAPLMLR											Mascot
		1578.81		1578.72	-0.0924	-59	22	35	GFIAEKNCAPLMLR					Oxidation (M)[12]						Mascot
		1619.84		1619.84	-0.001	-1	22	35	GFIAEKNCAPLMLR					Carbamidomethyl (C)[8]						Mascot
		1619.84		1619.84	-0.001	-1	22	35	GFIAEKNCAPLMLR					Carbamidomethyl (C)[8]						Mascot
		1636.84		1636.83	-0.0078	-5	61	76	SELAHGANNGLDIAVR											Mascot
		1636.84		1636.83	-0.0078	-5	61	76	SELAHGANNGLDIAVR			29	80.999							Mascot
		1912		1911.98	-0.0206	-11	59	76	FKSELAHGANNGLDIAVR											Mascot
	7	hypothetical protein Csa_2G263900 [Cucumis sativus]										KGN61895.1		32718.8	7.01		12	61	95.746	6	0
		Protein Group
		PREDICTED: triosephosphate isomerase, chloroplastic										XP_004147017.1		32718.8		7.01
		[Cucumis sativus]														2288
																8184
		Peptide Information
		Calc. Mass		Obsrv. Mass	± da	± ppm	Start	End	Sequence			Ion	C. I. %	Modification					Rank	Result Type
							Seq.	Seq.				Score
		954.483		954.48	-0.0036	-4	57	64	FFVGGNWK											Mascot
		1096.59		1096.59	0.0004	0	141	149	WVILGHSER											Mascot
		1285.62		1285.62	-0.0085	-7	190	199	TFDVCFQQLK					Carbamidomethyl (C)[5]						Mascot
		1357.67		1357.65	-0.0293	-22	151	162	HVIGEDDQFIGK											Mascot
		1419.75		1419.7	-0.0444	-31	289	302	GPEFGTIVNSVTAK											Mascot
		1435.74		1435.72	-0.0208	-14	122	135	GGAFTGEISVEQLK											Mascot
		1562.87		1562.74	-0.1272	-81	2	16	AAVSTSLASRFSPLR											Mascot
		1619.85		1619.84	-0.0114	-7	226	240	VATPEQAQEVHAAIR											Mascot
		1619.85		1619.84	-0.0114	-7	226	240	VATPEQAQEVHAAIR			6	0							Mascot
		1695.84		1695.8	-0.0354	-21	257	273	IIYGGSVNGSNCAELAK											Mascot
		1823.93		1823.88	-0.0486	-27	257	274	IIYGGSVNGSNCAELAKK											Mascot
		2274.19		2274.12	-0.0656	-29	84	103	LEDDVDVVVAPPFVYIEQ											Mascot
									VK
		2334.2		2334.18	-0.0205	-9	164	185	AAYALSEGLGVIACIGELL					Carbamidomethyl (C)[14]						Mascot
									EER
	8	hypothetical protein Csa_1G063610 [Cucumis sativus]										KGN64537.1		147005	5.65		24	51	62.082
		Protein Group
		PREDICTED: phospholipase A I isoform X1 [Cucumis										XP_004153391.1		147005		5.65
Project 1\Sample project20170120\R17064-3												XP_004153391.1								33	of	108
		sativus]														953
																6743
		Peptide Information
		Calc. Mass		Obsrv. Mass	± da	± ppm	Start	End	Sequence			Ion	C. I. %	Modification					Rank	Result Type
							Seq.	Seq.				Score
		921.44		921.425	-0.015	-16	1180	1186	WMVGAWR					Oxidation (M)[2]						Mascot
		931.492		931.471	-0.0207	-22	402	409	ADIMQPIK					Oxidation (M)[4]						Mascot
		1024.48		1024.46	-0.0246	-24	536	545	ILSMDGGGMK					Oxidation (M)[4]						Mascot
		1273.62		1273.6	-0.0149	-12	1031	1043	GAAFTPESPSGPR											Mascot
		1435.75		1435.72	-0.032	-22	1167	1179	TVPSLHLSPDDVR											Mascot
		1455.77		1455.73	-0.0416	-29	452	463	LLCAQKNPEVQR					Carbamidomethyl (C)[3]						Mascot
		1476.75		1476.8	0.0573	39	347	359	IMQDEGNRAVISK					Oxidation (M)[2]						Mascot
		1494.74		1494.79	0.0456	31	532	545	QGLRILSMDGGGMK					Oxidation (M)[8,13]						Mascot
		1633.89		1633.83	-0.0643	-39	221	234	VDFNFLVSVPVELR											Mascot
		1637.77		1637.82	0.0524	32	792	806	IDCLVSIGCGSTPMK					Carbamidomethyl (C)[3,9]						Mascot
		1641.72		1641.82	0.104	63	100	112	YREEAENVDVDMR					Oxidation (M)[12]						Mascot
		1695.86		1695.8	-0.0546	-32	636	650	VVVHGSKHSADQFER											Mascot
		1747.92		1747.93	0.0103	6	464	479	AALLTVGNLAFCLDNR					Carbamidomethyl (C)[12]						Mascot
		1753.94		1753.81	-0.1362	-78	1189	1204	IIFCTGTHGPTPALIR					Carbamidomethyl (C)[4]						Mascot
		1912.91		1912.98	0.0681	36	588	603	QMTLDQCEEIYKNLGK											Mascot
		1922.85		1922.95	0.1006	52	654	670	EMCADEDGDLLIESAVR					Carbamidomethyl (C)[3]						Mascot
		1941.05		1940.91	-0.1373	-71	2	17	SWGLGWKRPSEIFHLK											Mascot
		1961.06		1960.99	-0.0736	-38	1013	1030	LGRIDMVPPLNLDGHLGK					Oxidation (M)[6]						Mascot
		2025.07		2025.04	-0.0258	-13	1187	1204	DRIIFCTGTHGPTPALIR					Carbamidomethyl (C)[6]						Mascot
		2061.92		2061.86	-0.0569	-28	302	319	SVDVQIEMENNSYFGAS					Oxidation (M)[8]						Mascot
									R
		2061.92		2061.86	-0.0569	-28	302	319	SVDVQIEMENNSYFGAS					Oxidation (M)[8]						Mascot
									R
		2274.15		2274.12	-0.03	-13	933	953	NVLLVEASSSPDTGKVM											Mascot
									YHAR
		2334.28		2334.18	-0.1045	-45	79	99	LQSQLMVALPVPQDAVQ											Mascot
									VELR
		2939.35		2939.49	0.1377	47	32	61	VSSSSSCSSSSSSSSAAT											Mascot
									TILTQGQELGFR
		3067.6		3067.6	-0.0046	-1	765	791	WQDGAIVANNPTIFAIRE											Mascot
									AQLLWPDTK
	9	hypothetical protein Csa_6G205830 [Cucumis sativus]										KGN47209.1		87910.9	5.45		18	48	22.581
		Peptide Information
		Calc. Mass		Obsrv. Mass	± da	± ppm	Start	End	Sequence			Ion	C. I. %	Modification					Rank	Result Type
							Seq.	Seq.				Score
Project 1\Sample project20170120\R17064-3																				34	of	108
		1017.53		1017.57	0.0444	44	213	220	IWDEDLVK											Mascot
		1084.67		1084.65	-0.0225	-21	651	660	NGLIGKLLEK											Mascot
		1096.62		1096.59	-0.0282	-26	1	9	MIRYTGVLK					Oxidation (M)[1]						Mascot
		1135.48		1135.56	0.0821	72	750	759	TSSMFYPSLC											Mascot
		1273.59		1273.6	0.014	11	412	421	TFMPSEDRFK					Oxidation (M)[3]						Mascot
		1285.68		1285.62	-0.0594	-46	524	535	VMCLPPGANLVR					Oxidation (M)[2]						Mascot
		1309.72		1309.61	-0.1035	-79	388	398	LELKVFGFNDK											Mascot
		1353.61		1353.64	0.0262	19	168	178	ELQDIGNMDFR					Oxidation (M)[8]						Mascot
		1435.7		1435.72	0.0222	15	590	601	EQLGYVVQCSPR					Carbamidomethyl (C)[9]						Mascot
		1619.9		1619.84	-0.0617	-38	363	376	DKLNEIIYQATIAK											Mascot
		1619.9		1619.84	-0.0617	-38	363	376	DKLNEIIYQATIAK											Mascot
		1685.95		1685.79	-0.1617	-96	155	167	LLRQISPQEWIFR											Mascot
		1747.89		1747.93	0.0354	20	440	453	SHSSYLRLQVLCER					Carbamidomethyl (C)[12]						Mascot
		1753.76		1753.81	0.0424	24	105	121	GWATSLSAGVGDEGMC					Carbamidomethyl (C)[16]						Mascot
									R
		1808.82		1808.86	0.043	24	722	737	VWGCETNMIDAETPVK					Oxidation (M)[8]						Mascot
		1808.82		1808.86	0.043	24	722	737	VWGCETNMIDAETPVK					Oxidation (M)[8]						Mascot
		1840.81		1840.84	0.0266	14	744	759	DVEAFKTSSMFYPSLC					Oxidation (M)[10]						Mascot
		1911.97		1911.98	0.0149	8	520	535	HYERVMCLPPGANLVR					Carbamidomethyl (C)[7]						Mascot
		2568.27		2568.21	-0.061	-24	694	714	NIQKNNIIDWYNTYLQES											Mascot
									SPK
		2584.22		2584.21	-0.0056	-2	606	626	IYGFCFSVQSSEYNPIFL					Carbamidomethyl (C)[5]						Mascot
									QER
	10	PREDICTED: mitogen-activated protein kinase 20-like										XP_004143173.1		70460.7	9.28		16	47	0
		isoform X1 [Cucumis sativus]
		Protein Group
		PREDICTED: mitogen-activated protein kinase 20-like										XP_011657112.1		70389.6		9.2799
		isoform X2 [Cucumis sativus]														997329
																7119
		hypothetical protein Csa_6G179480 [Cucumis sativus]										KGN47041.1		70460.7		9.2799
																997329
																7119
		Peptide Information
		Calc. Mass		Obsrv. Mass	± da	± ppm	Start	End	Sequence			Ion	C. I. %	Modification					Rank	Result Type
							Seq.	Seq.				Score
		800.397		800.339	-0.0585	-73	266	271	YLTTMR					Oxidation (M)[5]						Mascot
		960.493		960.536	0.0427	44	156	164	NILANANCK											Mascot
		1017.51		1017.57	0.055	54	156	164	NILANANCK					Carbamidomethyl (C)[8]						Mascot
Project 1\Sample project20170120\R17064-3				1017.57																35	Mascot	of	108
		1135.63		1135.56	-0.0673	-59	165	174	LKICDFGLAR											Mascot
		1273.64		1273.6	-0.0414	-33	141	150	YIHTANVYHR											Mascot
		1353.62		1353.64	0.0116	9	535	547	AAKQASQCGMASK					Carbamidomethyl (C)[8], Oxidation (M)[10]						Mascot
		1357.69		1357.65	-0.0405	-30	387	398	KQFAHLEENGGK											Mascot
		1384.65		1384.59	-0.0591	-43	34	46	GSYGVVCSAIDTR					Carbamidomethyl (C)[7]						Mascot
		1388.67		1388.7	0.0271	20	609	620	VVAGQFNMTKMY											Mascot
		1400.72		1400.6	-0.1184	-85	322	333	IEREPSCQPITK											Mascot
		1550.81		1550.75	-0.053	-34	56	68	IHNIFEHISDAVR											Mascot
		1685.86		1685.79	-0.0777	-46	374	387	TNFLYPSAVDQFRK											Mascot
		1747.83		1747.93	0.1001	57	194	207	WYRAPELCGSFFSK					Carbamidomethyl (C)[8]						Mascot
		1823.77		1823.88	0.1115	61	9	24	NSTEVEFFSDYGDASR											Mascot
		2025.09		2025.04	-0.0476	-24	274	291	QPVPFSQKFPNADPLAL											Mascot
									R
		2043.91		2043.93	0.018	9	325	340	EPSCQPITKMEFEFER					Carbamidomethyl (C)[4], Oxidation (M)[10]						Mascot
		2568.31		2568.21	-0.0935	-36	98	118	DFKDIYVVFELMESDLHQ											Mascot
									VIK
		2584.3		2584.21	-0.0881	-34	98	118	DFKDIYVVFELMESDLHQ					Oxidation (M)[12]						Mascot
									VIK
Project 1\Sample project20170120\R17064-3																				36	of	108
Gel Idx/Pos			261/K13						Instr./Gel Origin		BA2151/Sample Project 20170120					Process Status			Analysis Succeeded
Plate [#] Name			[1] Sample Project 20170120						Instrument Sample Name							Spectra			11
Rank		Protein Name						Species				Accession No.		Protein MW		Protein	Pep.	Protein	Protein	Total Ion	Total Ion
																PI	Count	Score	Score	Score	C. I. %
																			C. I. %
	1	hypothetical protein Csa_5G198220 [Cucumis sativus]										KGN50632.1		42075.4	5.96		22	534	100	400	100
		Protein Group
		sedoheptulose-1,7-bisphosphatase [Cucumis sativus]										ACQ82818.1		42075.4		5.96
																381
																4697
		sedoheptulose-1,7-bisphosphatase, chloroplastic-like										NP_001267658.1		42075.4		5.96
		[Cucumis sativus]														381
																4697
		Peptide Information
		Calc. Mass		Obsrv. Mass	± da	± ppm	Start	End	Sequence			Ion	C. I. %	Modification					Rank	Result Type
							Seq.	Seq.				Score
		841.366		841.374	0.0076	9	140	145	YSHFCK					Carbamidomethyl (C)[5]						Mascot
		861.519		861.528	0.0089	10	133	139	LLFEALR											Mascot
		869.375		869.384	0.0088	10	332	340	AGGYSSDGR											Mascot
		903.505		903.511	0.0068	8	254	261	LFSPGNLR											Mascot
		903.505		903.511	0.0068	8	254	261	LFSPGNLR			19	0							Mascot
		908.545		908.543	-0.0023	-3	217	224	TTYVLALK											Mascot
		912.519		912.519	-0.0002	0	272	278	LINYYVK											Mascot
		987.511		987.514	0.004	4	347	354	VIENLDER											Mascot
		1066.55		1066.56	0.0098	9	37	46	ASSLFGESLR											Mascot
		1122.56		1122.56	-0.0039	-3	90	99	LLTCMGEALR					Oxidation (M)[5]						Mascot
		1163.59		1163.6	0.0047	4	90	99	LLTCMGEALR					Carbamidomethyl (C)[4]						Mascot
		1163.59		1163.6	0.0047	4	90	99	LLTCMGEALR			15	0	Carbamidomethyl (C)[4]						Mascot
		1185.51		1185.5	-0.0017	-1	262	271	ATFDNPDYDK											Mascot
		1188.55		1188.56	0.0028	2	368	377	FEETLYGSSR											Mascot
		1188.55		1188.56	0.0028	2	368	377	FEETLYGSSR			48	99.759							Mascot
		1251.66		1251.65	-0.0107	-9	302	313	GIFTNVTSPSTK											Mascot
		1478.71		1478.7	-0.0014	-1	202	216	GSDQVAAAMGVYGPR			105	100							Mascot
		1494.7		1494.69	-0.0091	-6	202	216	GSDQVAAAMGVYGPR					Oxidation (M)[9]						Mascot
		1494.7		1494.69	-0.0091	-6	202	216	GSDQVAAAMGVYGPR			10	0	Oxidation (M)[9]						Mascot
		1574.92		1574.9	-0.0161	-10	318	331	LLFEVAPLGFLVEK											Mascot
Project 1\Sample project20170120\R17064-3				1574.9																37	Mascot	of	108
		1574.92		1574.9	-0.0161	-10	318	331	LLFEVAPLGFLVEK			90	100							Mascot
		1618.88		1618.84	-0.0376	-23	86	99	GLIRLLTCMGEALR					Carbamidomethyl (C)[8], Oxidation (M)[9]						Mascot
		1633.86		1633.83	-0.0295	-18	285	299	YTGGMVPDVNQIIVK											Mascot
		1641.82		1641.86	0.0354	22	240	253	WQHVKETTEIGEGK											Mascot
		1649.86		1649.83	-0.0317	-19	285	299	YTGGMVPDVNQIIVK					Oxidation (M)[5]						Mascot
		1717.84		1717.82	-0.0201	-12	225	239	DFPGTHEFLLLDEGK											Mascot
		1717.84		1717.82	-0.0201	-12	225	239	DFPGTHEFLLLDEGK			124	100							Mascot
		1739.92		1739.82	-0.0987	-57	90	104	LLTCMGEALRTISFK					Carbamidomethyl (C)[4]						Mascot
		1755.91		1755.87	-0.0389	-22	90	104	LLTCMGEALRTISFK					Carbamidomethyl (C)[4], Oxidation (M)[5]						Mascot
		1844.1		1844.09	-0.0101	-5	316	331	LRLLFEVAPLGFLVEK											Mascot
		2079.01		2078.98	-0.0244	-12	262	278	ATFDNPDYDKLINYYVK											Mascot
		2717.19		2717.16	-0.0237	-9	107	132	TASCGGTACVNSFGDEQ					Carbamidomethyl (C)[4,9]						Mascot
									LAVDMLADK
		2733.18		2733.14	-0.0393	-14	107	132	TASCGGTACVNSFGDEQ					Carbamidomethyl (C)[4,9], Oxidation (M)[22]						Mascot
									LAVDMLADK
	2	hypothetical protein Csa_6G518380 [Cucumis sativus]										KGN49283.1		45728	5.72		19	143	100	40	98.649
		Protein Group
		PREDICTED: magnesium-chelatase subunit ChlI,										XP_004134671.1		45728		5.7199
		chloroplastic-like [Cucumis sativus]														997901
																9165
		Peptide Information
		Calc. Mass		Obsrv. Mass	± da	± ppm	Start	End	Sequence			Ion	C. I. %	Modification					Rank	Result Type
							Seq.	Seq.				Score
		945.54		945.523	-0.0172	-18	204	212	AFEPGLLAK											Mascot
		1030.56		1030.56	-0.0009	-1	322	330	LQQQISSAR											Mascot
		1066.56		1066.56	-0.0015	-1	248	257	EGISISHPAR											Mascot
		1154.68		1154.68	0.0017	1	127	136	SLVDLLPEIR											Mascot
		1154.68		1154.68	0.0017	1	127	136	SLVDLLPEIR			40	98.649							Mascot
		1188.6		1188.56	-0.0481	-40	349	359	VCAELNVDGLR											Mascot
		1188.6		1188.56	-0.0481	-40	349	359	VCAELNVDGLR											Mascot
		1202.61		1202.61	-0.0028	-2	279	289	FGMHAQVGTVR											Mascot
		1218.6		1218.6	-0.0075	-6	279	289	FGMHAQVGTVR					Oxidation (M)[3]						Mascot
		1245.63		1245.63	0.0015	1	349	359	VCAELNVDGLR					Carbamidomethyl (C)[2]						Mascot
		1297.75		1297.72	-0.0344	-27	97	107	LCLLLNVIDPK					Carbamidomethyl (C)[2]						Mascot
		1419.73		1419.7	-0.0325	-23	331	343	SSLSSVQIDQDLK											Mascot
		1543.78		1543.78	-0.0008	-1	174	187	INMVDLPLGATEDR											Mascot
		1559.77		1559.76	-0.0151	-10	174	187	INMVDLPLGATEDR					Oxidation (M)[3]						Mascot
Project 1\Sample project20170120\R17064-3				1559.76																38	Mascot	of	108
		1601.84		1601.79	-0.057	-36	346	359	ISRVCAELNVDGLR					Carbamidomethyl (C)[5]						Mascot
		1627.88		1627.84	-0.0372	-23	400	414	DPLESIDSGLLVIEK											Mascot
		1639.85		1639.84	-0.0062	-4	1	17	MAFALGGSSSTAILASR											Mascot
		1641.86		1641.86	-0.0044	-3	380	394	VAAEDIATVIPNCLR					Carbamidomethyl (C)[13]						Mascot
		1655.84		1655.81	-0.0317	-19	1	17	MAFALGGSSSTAILASR					Oxidation (M)[1]						Mascot
		1755.97		1755.87	-0.0996	-57	399	414	KDPLESIDSGLLVIEK											Mascot
		1884.98		1884.97	-0.0196	-10	378	394	DKVAAEDIATVIPNCLR					Carbamidomethyl (C)[15]						Mascot
		2165.07		2165.09	0.0176	8	78	96	ESQRPVYPFAAIVGQDE											Mascot
									MK
		2181.06		2181.05	-0.0179	-8	78	96	ESQRPVYPFAAIVGQDE					Oxidation (M)[18]						Mascot
									MK
		2353.25		2353.24	-0.0159	-7	258	278	FILIGSGNPEEGELRPQLL											Mascot
									DR
		2353.25		2353.24	-0.0159	-7	258	278	FILIGSGNPEEGELRPQLL											Mascot
									DR
		2452.1		2452.09	-0.008	-3	137	158	VVFGDPYNSDPEDPESM											Mascot
									GIEVR
		2468.09		2468.07	-0.0269	-11	137	158	VVFGDPYNSDPEDPESM					Oxidation (M)[17]						Mascot
									GIEVR
		3540.79		3540.78	-0.0031	-1	216	247	GILYVDEVNLLDDHLVDV											Mascot
									LLDSAASGWNTVER
	3	PREDICTED: restin homolog isoform X2 [Cucumis										XP_011653612.1		77861.9	5.14		19	61	95.937
		sativus]
		Peptide Information
		Calc. Mass		Obsrv. Mass	± da	± ppm	Start	End	Sequence			Ion	C. I. %	Modification					Rank	Result Type
							Seq.	Seq.				Score
		861.486		861.528	0.0419	49	583	589	LMIETVR											Mascot
		885.567		885.505	-0.0614	-69	85	91	RWLVALK											Mascot
		1066.51		1066.56	0.054	51	492	500	LEENLSSMK					Oxidation (M)[8]						Mascot
		1072.65		1072.6	-0.0496	-46	377	386	KVNTLLSAAR											Mascot
		1083.66		1083.59	-0.0765	-71	76	84	GIERVQLLR											Mascot
		1163.6		1163.6	-0.0031	-3	52	61	IGPRNMQGFK					Oxidation (M)[6]						Mascot
		1163.6		1163.6	-0.0031	-3	52	61	IGPRNMQGFK					Oxidation (M)[6]						Mascot
		1202.68		1202.61	-0.0754	-63	1	10	MSWLRAAVIR											Mascot
		1218.68		1218.6	-0.0802	-66	1	10	MSWLRAAVIR					Oxidation (M)[1]						Mascot
		1402.63		1402.66	0.0282	20	633	644	TKNFSMEAEMAK					Oxidation (M)[6]						Mascot
		1596.81		1596.9	0.0908	57	420	435	SVASYKVEAGAVNACK											Mascot
		1601.89		1601.79	-0.1073	-67	271	284	ILQEILSQVQLCSK											Mascot
		1639.7		1639.84	0.1369	83	256	270	EDQDTTSDGETRASK											Mascot
		1779.9		1779.75	-0.148	-83	397	411	EHFDEASNQILVHLK											Mascot
		1855.97		1855.93	-0.0358	-19	28	46	NVAGTVVYHAGNAVVEG											Mascot
									AK
Project 1\Sample project20170120\R17064-3																				39	of	108
		1940.97		1940.89	-0.0731	-38	122	138	KPTLVYYVDPDMGGELK					Oxidation (M)[12]						Mascot
		2194.09		2193.98	-0.1135	-52	394	411	EEREHFDEASNQILVHLK											Mascot
		2225.05		2225.06	0.0134	6	237	255	ACSLKETLDENHEELPPS					Carbamidomethyl (C)[2]						Mascot
									R
		2335.1		2335.28	0.1792	77	349	368	EMVQAEKELTDDIGELEN					Oxidation (M)[2]						Mascot
									QK
		2691.31		2691.29	-0.0176	-7	522	544	LEEEYLDMESKFVSTLST											Mascot
									VDTVR
		2721.39		2721.22	-0.1677	-62	186	209	QAVMTSVHNLAKAFSEY											Mascot
									QDEILVK
	4	PREDICTED: golgin subfamily B member 1 isoform X1										XP_011653611.1		77948.9	5.14		19	61	95.842
		[Cucumis sativus]
		Peptide Information
		Calc. Mass		Obsrv. Mass	± da	± ppm	Start	End	Sequence			Ion	C. I. %	Modification					Rank	Result Type
							Seq.	Seq.				Score
		861.486		861.528	0.0419	49	584	590	LMIETVR											Mascot
		885.567		885.505	-0.0614	-69	85	91	RWLVALK											Mascot
		1066.51		1066.56	0.054	51	493	501	LEENLSSMK					Oxidation (M)[8]						Mascot
		1072.65		1072.6	-0.0496	-46	378	387	KVNTLLSAAR											Mascot
		1083.66		1083.59	-0.0765	-71	76	84	GIERVQLLR											Mascot
		1163.6		1163.6	-0.0031	-3	52	61	IGPRNMQGFK					Oxidation (M)[6]						Mascot
		1163.6		1163.6	-0.0031	-3	52	61	IGPRNMQGFK					Oxidation (M)[6]						Mascot
		1202.68		1202.61	-0.0754	-63	1	10	MSWLRAAVIR											Mascot
		1218.68		1218.6	-0.0802	-66	1	10	MSWLRAAVIR					Oxidation (M)[1]						Mascot
		1402.63		1402.66	0.0282	20	634	645	TKNFSMEAEMAK					Oxidation (M)[6]						Mascot
		1596.81		1596.9	0.0908	57	421	436	SVASYKVEAGAVNACK											Mascot
		1601.89		1601.79	-0.1073	-67	271	284	ILQEILSQVQLCSK											Mascot
		1639.7		1639.84	0.1369	83	256	270	EDQDTTSDGETRASK											Mascot
		1779.9		1779.75	-0.148	-83	398	412	EHFDEASNQILVHLK											Mascot
		1855.97		1855.93	-0.0358	-19	28	46	NVAGTVVYHAGNAVVEG											Mascot
									AK
		1940.97		1940.89	-0.0731	-38	122	138	KPTLVYYVDPDMGGELK					Oxidation (M)[12]						Mascot
		2194.09		2193.98	-0.1135	-52	395	412	EEREHFDEASNQILVHLK											Mascot
		2225.05		2225.06	0.0134	6	237	255	ACSLKETLDENHEELPPS					Carbamidomethyl (C)[2]						Mascot
									R
		2335.1		2335.28	0.1792	77	350	369	EMVQAEKELTDDIGELEN					Oxidation (M)[2]						Mascot
									QK
		2691.31		2691.29	-0.0176	-7	523	545	LEEEYLDMESKFVSTLST											Mascot
									VDTVR
		2721.39		2721.22	-0.1677	-62	186	209	QAVMTSVHNLAKAFSEY											Mascot
									QDEILVK
	5	hypothetical protein Csa_2G354690 [Cucumis sativus]										KGN62443.1		38913.4	8.99		12	44	0
Project 1\Sample project20170120\R17064-3																				40	of	108
		Peptide Information
		Calc. Mass		Obsrv. Mass	± da	± ppm	Start	End	Sequence			Ion	C. I. %	Modification					Rank	Result Type
							Seq.	Seq.				Score
		883.452		883.489	0.037	42	276	283	SVSKYDGK											Mascot
		987.595		987.514	-0.08	-81	267	275	VLSGRSLQK											Mascot
		1154.59		1154.68	0.0923	80	98	107	DLAFMKTANK					Oxidation (M)[5]						Mascot
		1154.59		1154.68	0.0923	80	98	107	DLAFMKTANK					Oxidation (M)[5]						Mascot
		1163.6		1163.6	0.0002	0	258	266	HRDFYNALK											Mascot
		1163.6		1163.6	0.0002	0	258	266	HRDFYNALK											Mascot
		1188.63		1188.56	-0.0733	-62	312	321	MVLPNTQEIK					Oxidation (M)[1]						Mascot
		1188.63		1188.56	-0.0733	-62	312	321	MVLPNTQEIK					Oxidation (M)[1]						Mascot
		1202.58		1202.61	0.0303	25	322	331	HQLMAAECRK					Oxidation (M)[4]						Mascot
		1402.72		1402.66	-0.0557	-40	286	297	MLTITQIAHCSK					Carbamidomethyl (C)[10]						Mascot
		1583.7		1583.74	0.049	31	109	121	YEEEEEEVSALEK											Mascot
		1586.88		1586.81	-0.0702	-44	284	297	IKMLTITQIAHCSK											Mascot
		1699.87		1699.83	-0.0415	-24	179	195	SGSQGPDTITLRGAPSR											Mascot
		1739.8		1739.82	0.0226	13	108	121	RYEEEEEEVSALEK											Mascot
		1824.04		1823.86	-0.173	-95	59	75	SSLSVPVIVPEEDLVIK											Mascot
	6	PREDICTED: TMV resistance protein N-like isoform X2										XP_011649006.1		75548.2	7.86		19	42	0
		[Cucumis sativus]
		Peptide Information
		Calc. Mass		Obsrv. Mass	± da	± ppm	Start	End	Sequence			Ion	C. I. %	Modification					Rank	Result Type
							Seq.	Seq.				Score
		819.436		819.359	-0.0766	-93	191	197	YPVGIDR											Mascot
		883.445		883.489	0.0436	49	380	386	RAVSYCK					Carbamidomethyl (C)[6]						Mascot
		903.566		903.511	-0.0548	-61	538	545	AIKLSFPK											Mascot
		903.566		903.511	-0.0548	-61	538	545	AIKLSFPK											Mascot
		1094.58		1094.56	-0.0206	-19	131	139	LEVRFSSEK											Mascot
		1122.65		1122.56	-0.091	-81	226	235	TTLAKALYNK											Mascot
		1163.68		1163.6	-0.0865	-74	102	111	GQVVLPIFYK											Mascot
		1163.68		1163.6	-0.0865	-74	102	111	GQVVLPIFYK											Mascot
		1201.62		1201.63	0.0129	11	161	170	KDDEANLIQR											Mascot
		1207.53		1207.5	-0.0264	-22	521	531	DDAMDVLNGNK					Oxidation (M)[4]						Mascot
		1297.78		1297.72	-0.0633	-49	258	268	GLVELQKELLR											Mascot
		1350.69		1350.71	0.0196	15	575	586	GTDLEYLPSSLR											Mascot
		1494.74		1494.69	-0.052	-35	546	558	ATELDIDSRAFEK											Mascot
Project 1\Sample project20170120\R17064-3																				41	of	108
		1494.74		1494.69	-0.052	-35	546	558	ATELDIDSRAFEK											Mascot
		1574.85		1574.9	0.0574	36	265	277	ELLREILMDDSIK											Mascot
		1574.85		1574.9	0.0574	36	265	277	ELLREILMDDSIK											Mascot
		1627.73		1627.84	0.1106	68	459	471	MKLEACGCLCLEK					Carbamidomethyl (C)[6,8,10], Oxidation						Mascot
														(M)[1]
		1633.89		1633.83	-0.0619	-38	476	489	LMNLSLLTIDKSNR					Oxidation (M)[2]						Mascot
		1655.82		1655.81	-0.0058	-4	409	421	LILDEYENQYLDK											Mascot
		1671.96		1671.81	-0.1581	-95	559	574	VKNVVVLEVGNVTSSK											Mascot
		1739.81		1739.82	0.0071	4	461	475	LEACGCLCLEKGTTK					Carbamidomethyl (C)[4,6,8]						Mascot
		1755.86		1755.87	0.0186	11	145	160	EAMISVSHMSGWPVPK											Mascot
		1779.9		1779.75	-0.141	-79	86	99	WCLNELVKIIMCNK					Carbamidomethyl (C)[2], Oxidation (M)[11]						Mascot
	7	hypothetical protein Csa_4G293190 [Cucumis sativus]										KGN54209.1		44524.2	5.15		11	40	0
		Peptide Information
		Calc. Mass		Obsrv. Mass	± da	± ppm	Start	End	Sequence			Ion	C. I. %	Modification					Rank	Result Type
							Seq.	Seq.				Score
		885.567		885.505	-0.0614	-69	85	91	RWLVALK											Mascot
		1083.66		1083.59	-0.0765	-71	76	84	GIERVQLLR											Mascot
		1163.6		1163.6	-0.0031	-3	52	61	IGPRNMQGFK					Oxidation (M)[6]						Mascot
		1163.6		1163.6	-0.0031	-3	52	61	IGPRNMQGFK					Oxidation (M)[6]						Mascot
		1202.68		1202.61	-0.0754	-63	1	10	MSWLRAAVIR											Mascot
		1218.68		1218.6	-0.0802	-66	1	10	MSWLRAAVIR					Oxidation (M)[1]						Mascot
		1601.89		1601.79	-0.1073	-67	271	284	ILQEILSQVQLCSK											Mascot
		1639.7		1639.84	0.1369	83	256	270	EDQDTTSDGETRASK											Mascot
		1855.97		1855.93	-0.0358	-19	28	46	NVAGTVVYHAGNAVVEG											Mascot
									AK
		1940.97		1940.89	-0.0731	-38	122	138	KPTLVYYVDPDMGGELK					Oxidation (M)[12]						Mascot
		2225.05		2225.06	0.0134	6	237	255	ACSLKETLDENHEELPPS					Carbamidomethyl (C)[2]						Mascot
									R
		2335.1		2335.28	0.1792	77	350	369	EMVQAEKELTDDIGELEN					Oxidation (M)[2]						Mascot
									QK
		2721.39		2721.22	-0.1677	-62	186	209	QAVMTSVHNLAKAFSEY											Mascot
									QDEILVK
	8	PREDICTED: kinesin-4 isoform X2 [Cucumis sativus]										XP_011654742.1		122116	6.23		20	40	0
		Peptide Information
		Calc. Mass		Obsrv. Mass	± da	± ppm	Start	End	Sequence			Ion	C. I. %	Modification					Rank	Result Type
							Seq.	Seq.				Score
		859.5		859.457	-0.0429	-50	410	416	REVLNTK											Mascot
		883.479		883.489	0.0105	12	735	741	TPHIPYR											Mascot
		902.531		902.512	-0.0188	-21	1071	1079	APTASSIKK											Mascot
Project 1\Sample project20170120\R17064-3																				42	of	108
		908.527		908.543	0.0155	17	284	290	LKIEMFK											Mascot
		987.479		987.514	0.0357	36	852	859	RHSSMTPR					Oxidation (M)[5]						Mascot
		1030.58		1030.56	-0.0149	-14	604	613	DLLSTSGLPK											Mascot
		1066.61		1066.56	-0.0491	-46	244	252	HQSNLLKAR											Mascot
		1094.54		1094.56	0.0236	22	638	647	STGDVLDLMK					Oxidation (M)[9]						Mascot
		1110.58		1110.54	-0.0444	-40	1079	1089	KMIVGSSSSSK											Mascot
		1163.63		1163.6	-0.0308	-26	1067	1078	SSSKAPTASSIK											Mascot
		1163.63		1163.6	-0.0308	-26	1067	1078	SSSKAPTASSIK											Mascot
		1201.64		1201.63	-0.0122	-10	677	687	GVDLETDAILR											Mascot
		1419.71		1419.7	-0.0112	-8	365	376	HVKDLETFSESK											Mascot
		1430.61		1430.71	0.0958	67	889	901	SEAGSLQSMDDFK					Oxidation (M)[9]						Mascot
		1478.82		1478.7	-0.1144	-77	664	676	SSRSHSVLTIHVR											Mascot
		1586.71		1586.81	0.094	59	888	901	RSEAGSLQSMDDFK					Oxidation (M)[10]						Mascot
		1655.92		1655.81	-0.1083	-65	648	663	IGLTNRAVGATALNER											Mascot
		1671.84		1671.81	-0.0319	-19	384	396	EFVYQNFIDDLLR											Mascot
		1737.92		1738.02	0.0963	55	688	703	GSLHLIDLAGSERVDR											Mascot
		2078.99		2078.98	-0.0024	-1	531	550	SVLDGYNVCIFAYGQTGS											Mascot
									GK
		2353.29		2353.24	-0.0523	-22	713	734	EAQHINKSLSALGDVIFAL											Mascot
									AQK
		2353.29		2353.24	-0.0523	-22	713	734	EAQHINKSLSALGDVIFAL											Mascot
									AQK
	9	hypothetical protein Csa_1G042950 [Cucumis sativus]										KGN64189.1		68443.5	9.04		14	40	0
		Protein Group
		PREDICTED: DEAD-box ATP-dependent RNA helicase										XP_004137513.1		68443.5		9.0399
		51 [Cucumis sativus]														999618
																5303
		Peptide Information
		Calc. Mass		Obsrv. Mass	± da	± ppm	Start	End	Sequence			Ion	C. I. %	Modification					Rank	Result Type
							Seq.	Seq.				Score
		1088.49		1088.57	0.0868	80	392	400	IDCMDIHGK					Carbamidomethyl (C)[3]						Mascot
		1104.54		1104.56	0.0197	18	271	279	CLIIDEADR					Carbamidomethyl (C)[1]						Mascot
		1144.61		1144.55	-0.0644	-56	510	519	LVGSNYHLNK											Mascot
		1188.64		1188.56	-0.0846	-71	419	429	GILLCTDVAAR					Carbamidomethyl (C)[5]						Mascot
		1188.64		1188.56	-0.0846	-71	419	429	GILLCTDVAAR					Carbamidomethyl (C)[5]						Mascot
		1218.63		1218.6	-0.0292	-24	406	415	RTSTFFAFNK											Mascot
		1402.74		1402.66	-0.0734	-52	268	279	NLKCLIIDEADR											Mascot
		1427.7		1427.78	0.0855	60	527	538	TYLLAYNSHSMK											Mascot
Project 1\Sample project20170120\R17064-3																				43	of	108
		1639.68		1639.84	0.1571	96	138	150	DMGFEHMTQIQDR					Oxidation (M)[2,7]						Mascot
		1739.96		1739.82	-0.1396	-80	254	267	LLDHLQHTKNFVFK											Mascot
		2079.05		2078.98	-0.0713	-34	335	353	TKVTNEGLQQGYCVVPS					Carbamidomethyl (C)[13]						Mascot
									AK
		2222.04		2222	-0.0403	-18	1	20	MAVLDENVPSSSEVEAM					Oxidation (M)[1]						Mascot
									NKR
		2238.04		2238.01	-0.0266	-12	1	20	MAVLDENVPSSSEVEAM					Oxidation (M)[1,17]						Mascot
									NKR
		2401.16		2401.2	0.0476	20	112	134	TGGSGIMSTVSFDSLELS											Mascot
									ENTLR
		2468.17		2468.07	-0.1031	-42	271	290	CLIIDEADRILETNFEEEM					Carbamidomethyl (C)[1]						Mascot
									K
		2551.29		2551.34	0.0408	16	370	391	VMVFFSSCNSVTFHADLL											Mascot
									RHIK
	10	hypothetical protein Csa_2G251470 [Cucumis sativus]										KGN61846.1		41486.1	6.75		7	40	0	22	5.904
		Protein Group
		PREDICTED: endophilin-A1 [Cucumis sativus]										XP_004150141.1		41486.1		6.75
		Peptide Information
		Calc. Mass		Obsrv. Mass	± da	± ppm	Start	End	Sequence			Ion	C. I. %	Modification					Rank	Result Type
							Seq.	Seq.				Score
		1122.65		1122.56	-0.091	-81	50	58	LEKLYISTR											Mascot
		1154.65		1154.68	0.0269	23	131	141	ALGTQVAEPLR											Mascot
		1154.65		1154.68	0.0269	23	131	141	ALGTQVAEPLR			22	5.904							Mascot
		1362.69		1362.68	-0.0074	-5	164	175	QEAEAQAIEVFK											Mascot
		1478.67		1478.7	0.035	24	337	349	KVSNNGWAEGECK					Carbamidomethyl (C)[12]						Mascot
		1649.83		1649.83	-0.0064	-4	162	175	MRQEAEAQAIEVFK											Mascot
		1865.95		1866.11	0.165	88	142	158	AMVMGAPLEDARHLAQR											Mascot
		2412.24		2412.17	-0.0713	-30	131	153	ALGTQVAEPLRAMVMGA					Oxidation (M)[13]						Mascot
									PLEDAR
Project 1\Sample project20170120\R17064-3																				44	of	108
Gel Idx/Pos			262/K14						Instr./Gel Origin		BA2151/Sample Project 20170120					Process Status			Analysis Succeeded
Plate [#] Name			[1] Sample Project 20170120						Instrument Sample Name							Spectra			11
Rank		Protein Name						Species				Accession No.		Protein MW		Protein	Pep.	Protein	Protein	Total Ion	Total Ion
																PI	Count	Score	Score	Score	C. I. %
																			C. I. %
	1	PREDICTED: elongation factor 1-delta isoform X1										XP_011652060.1		24670.3	4.45		15	417	100	310	100
		[Cucumis sativus]
		Protein Group
		PREDICTED: elongation factor 1-delta isoform X1										XP_011652056.1		24670.3		4.4499
		[Cucumis sativus]														998092
																6514
		PREDICTED: elongation factor 1-delta isoform X2										XP_011652065.1		24670.3		4.4499
		[Cucumis sativus]														998092
																6514
		hypothetical protein Csa_1G050420 [Cucumis sativus]										KGN64403.1		24670.3		4.4499
																998092
																6514
		Peptide Information
		Calc. Mass		Obsrv. Mass	± da	± ppm	Start	End	Sequence			Ion	C. I. %	Modification					Rank	Result Type
							Seq.	Seq.				Score
		844.489		844.505	0.0165	20	155	161	KLEEAVR											Mascot
		945.577		945.58	0.0031	3	175	183	LVPVGYGIK											Mascot
		945.577		945.58	0.0031	3	175	183	LVPVGYGIK			25	67.026							Mascot
		1008.54		1008.54	0.0084	8	17	24	LDEYLLSR											Mascot
		1008.54		1008.54	0.0084	8	17	24	LDEYLLSR			43	99.493							Mascot
		1096.53		1096.53	0.0069	6	67	78	ASASFGEGSGVK											Mascot
		1103.54		1103.54	0.0053	5	25	34	SYISGYQASK											Mascot
		1242.67		1242.69	0.011	9	57	66	WYNHIAALVR											Mascot
		1242.67		1242.69	0.011	9	57	66	WYNHIAALVR			55	99.962							Mascot
		1405.71		1405.71	-0.0031	-2	162	174	SVQMEGLLWGASK											Mascot
		1405.71		1405.71	-0.0031	-2	162	174	SVQMEGLLWGASK			28	81.963							Mascot
		1421.71		1421.7	-0.0066	-5	162	174	SVQMEGLLWGASK					Oxidation (M)[4]						Mascot
		1421.71		1421.7	-0.0066	-5	162	174	SVQMEGLLWGASK			38	98.163	Oxidation (M)[4]						Mascot
		1489.72		1489.7	-0.0134	-9	79	93	FDSDAIATPPAADAK											Mascot
		1663.9		1663.89	-0.0091	-5	10	24	SAAGLQKLDEYLLSR											Mascot
		2009.92		2009.9	-0.0145	-7	138	154	SSVLMDIKPWDDETDMK											Mascot
Project 1\Sample project20170120\R17064-3				2009.9																45	Mascot	of	108
		2025.91		2025.89	-0.0273	-13	138	154	SSVLMDIKPWDDETDMK					Oxidation (M)[5]						Mascot
		2041.91		2041.88	-0.0308	-15	138	154	SSVLMDIKPWDDETDMK					Oxidation (M)[5,16]						Mascot
		2041.91		2041.88	-0.0308	-15	138	154	SSVLMDIKPWDDETDMK					Oxidation (M)[5,16]						Mascot
		2154.01		2153.97	-0.0408	-19	138	155	SSVLMDIKPWDDETDMK					Oxidation (M)[5]						Mascot
									K
		2170		2169.96	-0.0488	-22	138	155	SSVLMDIKPWDDETDMK					Oxidation (M)[5,16]						Mascot
									K
		2441.22		2441.22	0.0054	2	35	56	DDIAVYEALSKPVSSEYV											Mascot
									NVSR
		2441.22		2441.22	0.0054	2	35	56	DDIAVYEALSKPVSSEYV			150	100							Mascot
									NVSR
		2443.1		2442.87	-0.2309	-95	134	154	ESGKSSVLMDIKPWDDE					Oxidation (M)[9,20]						Mascot
									TDMK
		2619.95		2619.92	-0.0359	-14	94	116	ASADDEDDDDDMDLFGE											Mascot
									ETEEEK
		2635.95		2635.9	-0.0425	-16	94	116	ASADDEDDDDDMDLFGE					Oxidation (M)[12]						Mascot
									ETEEEK
		3525.74		3525.77	0.0283	8	25	56	SYISGYQASKDDIAVYEA											Mascot
									LSKPVSSEYVNVSR
	2	PREDICTED: elongation factor 1-delta 2-like [Cucumis										XP_004138389.1		24407.3	4.5		8	144	100	106	100
		sativus]
		Peptide Information
		Calc. Mass		Obsrv. Mass	± da	± ppm	Start	End	Sequence			Ion	C. I. %	Modification					Rank	Result Type
							Seq.	Seq.				Score
		844.489		844.505	0.0165	20	152	158	KLEEAVR											Mascot
		945.577		945.58	0.0031	3	172	180	LVPVGYGIK											Mascot
		945.577		945.58	0.0031	3	172	180	LVPVGYGIK			25	67.026							Mascot
		1008.54		1008.54	0.0084	8	17	24	LDEYLLSR											Mascot
		1008.54		1008.54	0.0084	8	17	24	LDEYLLSR			43	99.493							Mascot
		1136.63		1136.64	0.0058	5	16	24	KLDEYLLSR											Mascot
		1405.71		1405.71	-0.0031	-2	159	171	SVQMEGLLWGASK											Mascot
		1405.71		1405.71	-0.0031	-2	159	171	SVQMEGLLWGASK			28	81.963							Mascot
		1421.71		1421.7	-0.0066	-5	159	171	SVQMEGLLWGASK					Oxidation (M)[4]						Mascot
		1421.71		1421.7	-0.0066	-5	159	171	SVQMEGLLWGASK			38	98.163	Oxidation (M)[4]						Mascot
		2009.92		2009.9	-0.0145	-7	135	151	SSVLMDIKPWDDETDMK											Mascot
		2025.91		2025.89	-0.0273	-13	135	151	SSVLMDIKPWDDETDMK					Oxidation (M)[5]						Mascot
		2041.91		2041.88	-0.0308	-15	135	151	SSVLMDIKPWDDETDMK					Oxidation (M)[5,16]						Mascot
		2041.91		2041.88	-0.0308	-15	135	151	SSVLMDIKPWDDETDMK					Oxidation (M)[5,16]						Mascot
		2154.01		2153.97	-0.0408	-19	135	152	SSVLMDIKPWDDETDMK					Oxidation (M)[5]						Mascot
									K
		2170		2169.96	-0.0488	-22	135	152	SSVLMDIKPWDDETDMK					Oxidation (M)[5,16]						Mascot
									K
		2443.1		2442.87	-0.2309	-95	131	151	ESGKSSVLMDIKPWDDE					Oxidation (M)[9,20]						Mascot
									TDMK
Project 1\Sample project20170120\R17064-3																				46	of	108
	3	hypothetical protein Csa_6G014660 [Cucumis sativus]										KGN45846.1		46098.2	5.46		10	135	100	106	100
		Peptide Information
		Calc. Mass		Obsrv. Mass	± da	± ppm	Start	End	Sequence			Ion	C. I. %	Modification					Rank	Result Type
							Seq.	Seq.				Score
		844.489		844.505	0.0165	20	194	200	KLEEAVR											Mascot
		927.573		927.5	-0.0733	-79	354	361	SPVRLSIR											Mascot
		945.577		945.58	0.0031	3	214	222	LVPVGYGIK											Mascot
		945.577		945.58	0.0031	3	214	222	LVPVGYGIK			25	67.026							Mascot
		1008.54		1008.54	0.0084	8	59	66	LDEYLLSR											Mascot
		1008.54		1008.54	0.0084	8	59	66	LDEYLLSR			43	99.493							Mascot
		1136.63		1136.64	0.0058	5	58	66	KLDEYLLSR											Mascot
		1254.63		1254.67	0.0405	32	2	11	PFSLFICQSR					Carbamidomethyl (C)[7]						Mascot
		1405.71		1405.71	-0.0031	-2	201	213	SVQMEGLLWGASK											Mascot
		1405.71		1405.71	-0.0031	-2	201	213	SVQMEGLLWGASK			28	81.963							Mascot
		1421.71		1421.7	-0.0066	-5	201	213	SVQMEGLLWGASK					Oxidation (M)[4]						Mascot
		1421.71		1421.7	-0.0066	-5	201	213	SVQMEGLLWGASK			38	98.163	Oxidation (M)[4]						Mascot
		2009.92		2009.9	-0.0145	-7	177	193	SSVLMDIKPWDDETDMK											Mascot
		2025.91		2025.89	-0.0273	-13	177	193	SSVLMDIKPWDDETDMK					Oxidation (M)[5]						Mascot
		2041.91		2041.88	-0.0308	-15	177	193	SSVLMDIKPWDDETDMK					Oxidation (M)[5,16]						Mascot
		2041.91		2041.88	-0.0308	-15	177	193	SSVLMDIKPWDDETDMK					Oxidation (M)[5,16]						Mascot
		2154.01		2153.97	-0.0408	-19	177	194	SSVLMDIKPWDDETDMK					Oxidation (M)[5]						Mascot
									K
		2170		2169.96	-0.0488	-22	177	194	SSVLMDIKPWDDETDMK					Oxidation (M)[5,16]						Mascot
									K
		2443.1		2442.87	-0.2309	-95	173	193	ESGKSSVLMDIKPWDDE					Oxidation (M)[9,20]						Mascot
									TDMK
	4	hypothetical protein Csa_1G615200 [Cucumis sativus]										KGN66501.1		6233.2	9.99		5	42	0
		Peptide Information
		Calc. Mass		Obsrv. Mass	± da	± ppm	Start	End	Sequence			Ion	C. I. %	Modification					Rank	Result Type
							Seq.	Seq.				Score
		945.598		945.58	-0.018	-19	42	50	TLALLSSLK											Mascot
		945.598		945.58	-0.018	-19	42	50	TLALLSSLK											Mascot
		1008.5		1008.54	0.0479	47	1	8	MQVRPSMK					Oxidation (M)[1,7]						Mascot
		1008.5		1008.54	0.0479	47	1	8	MQVRPSMK					Oxidation (M)[1,7]						Mascot
		1052.51		1052.49	-0.0177	-17	51	60	MPDAKGLASF					Oxidation (M)[1]						Mascot
		1503.85		1503.77	-0.0743	-49	42	55	TLALLSSLKMPDAK					Oxidation (M)[10]						Mascot
		3348.66		3348.63	-0.0362	-11	9	41	MLLGQRGGVWPASNGE					Oxidation (M)[1]						Mascot
									DVAQSFSGGGINVLSTK
Project 1\Sample project20170120\R17064-3																				47	of	108
	5	PREDICTED: uncharacterized protein LOC101216395										XP_011656414.1		123566	7.09		20	42	0
		[Cucumis sativus]
		Peptide Information
		Calc. Mass		Obsrv. Mass	± da	± ppm	Start	End	Sequence			Ion	C. I. %	Modification					Rank	Result Type
							Seq.	Seq.				Score
		807.384		807.399	0.0151	19	902	908	TVSDTER											Mascot
		945.519		945.58	0.0613	65	1	9	MPTAVSLAR											Mascot
		945.536		945.58	0.0436	46	825	833	LSQAIQTGK											Mascot
		967.518		967.561	0.0432	45	722	729	QRHGSNLR											Mascot
		1096.53		1096.53	-0.0005	0	1100	1109	IIFDPKSCSS											Mascot
		1140.62		1140.56	-0.0583	-51	202	211	GFLFPLSGFR											Mascot
		1254.58		1254.67	0.0921	73	269	278	TICLENDFSR					Carbamidomethyl (C)[3]						Mascot
		1296.72		1296.62	-0.1019	-79	201	211	RGFLFPLSGFR											Mascot
		1639.9		1639.92	0.0207	13	581	594	LQEGTPKIENLELR											Mascot
		1940.97		1940.9	-0.0668	-34	563	580	SNTFPLSGKASNENFLSK											Mascot
		2009.95		2009.9	-0.0474	-24	595	612	SRNSPFSLSISSVDDENR											Mascot
		2025.95		2025.89	-0.0675	-33	922	939	LNVIDGSSDHHEISEMVK					Oxidation (M)[16]						Mascot
		2032		2031.9	-0.0959	-47	506	523	EAPMFPTVVGFHATEDK											Mascot
									R
		2047.95		2047.88	-0.071	-35	184	201	GPPLFLCNLMDCSDPNR											Mascot
									R
		2058.02		2057.87	-0.147	-71	10	29	QCLAPDAAHALDEAVAV											Mascot
									AHR
		2063.95		2063.86	-0.0844	-41	184	201	GPPLFLCNLMDCSDPNR					Oxidation (M)[10]						Mascot
									R
		2154.05		2153.97	-0.0811	-38	921	939	KLNVIDGSSDHHEISEMV					Oxidation (M)[17]						Mascot
									K
		2170.11		2169.96	-0.1504	-69	85	105	VPSTQISDDPPVSNSLMA											Mascot
									AIK
		2308.21		2308.12	-0.0894	-39	371	389	DWDLHLLPITSLRPESYP											Mascot
									R
		2441.27		2441.22	-0.0456	-19	804	824	QPLSIVMLENVDKAELLD					Oxidation (M)[7]						Mascot
									QNR
		2441.27		2441.22	-0.0456	-19	804	824	QPLSIVMLENVDKAELLD					Oxidation (M)[7]						Mascot
									QNR
		2838.27		2838.41	0.1323	47	269	292	TICLENDFSRYLSENSEM					Carbamidomethyl (C)[3]						Mascot
									GSLNMK
	6	hypothetical protein Csa_1G042400 [Cucumis sativus]										KGN64128.1		27117.6	9.48		9	40	0
		Protein Group
		PREDICTED: putative protein TPRXL [Cucumis sativus]										XP_011650562.1		27117.6		9.4799
																995422
																3633
		Peptide Information
Project 1\Sample project20170120\R17064-3																				48	of	108
		Calc. Mass		Obsrv. Mass	± da	± ppm	Start	End	Sequence			Ion	C. I. %	Modification					Rank	Result Type
							Seq.	Seq.				Score
		927.484		927.5	0.0166	18	123	129	SFWGFKR											Mascot
		1140.55		1140.56	0.0086	8	130	139	STSLNNFETK											Mascot
		1232.61		1232.6	-0.0155	-13	228	239	FFGFGSLLGCGK											Mascot
		1296.65		1296.62	-0.035	-27	129	139	RSTSLNNFETK											Mascot
		1405.69		1405.71	0.0221	16	10	21	ISFSHNLICESR											Mascot
		1405.69		1405.71	0.0221	16	10	21	ISFSHNLICESR											Mascot
		1443.67		1443.69	0.0234	16	22	32	SPMDQYVEYRR											Mascot
		1459.66		1459.68	0.0185	13	22	32	SPMDQYVEYRR					Oxidation (M)[3]						Mascot
		1489.75		1489.7	-0.0474	-32	228	241	FFGFGSLLGCGKEK											Mascot
		1979.07		1978.95	-0.1227	-62	75	92	QSHPSLPPLPPSIEHSKK											Mascot
		2476.22		2476.22	0.001	0	185	206	SSPSPPSSLNQYPTILKP					Carbamidomethyl (C)[21], Oxidation (M)[20]						Mascot
									QMCK
	7	hypothetical protein Csa_5G321470 [Cucumis sativus]										KGN50909.1		49755.1	10.02		14	40	0
		Peptide Information
		Calc. Mass		Obsrv. Mass	± da	± ppm	Start	End	Sequence			Ion	C. I. %	Modification					Rank	Result Type
							Seq.	Seq.				Score
		807.439		807.399	-0.0399	-49	77	83	SMKNLSK											Mascot
		841.514		841.437	-0.0776	-92	340	346	TPLIELR											Mascot
		870.556		870.548	-0.0081	-9	277	283	LIWIGLR											Mascot
		989.508		989.541	0.0329	33	286	293	LEPKTDMR											Mascot
		1225.62		1225.65	0.028	23	362	371	CKVYCVAVAR					Carbamidomethyl (C)[1,5]						Mascot
		1242.75		1242.69	-0.0604	-49	222	232	SYLPLLPPKSK											Mascot
		1242.75		1242.69	-0.0604	-49	222	232	SYLPLLPPKSK											Mascot
		1274.74		1274.68	-0.0688	-54	409	420	NIVGLPHRGGVR											Mascot
		1357.75		1357.71	-0.036	-27	4	16	DLSKIAGWVGPSK											Mascot
		1459.72		1459.68	-0.0357	-24	98	110	DPTAEWVSNLATR											Mascot
		1639.77		1639.92	0.151	92	374	386	EDFENVLRFEGER											Mascot
		1760.84		1760.88	0.0398	23	144	158	FFAPQYSSNILCASR					Carbamidomethyl (C)[12]						Mascot
		2010.02		2009.9	-0.1112	-55	399	416	SMAHVAGYCKNIVGLPH					Carbamidomethyl (C)[9]						Mascot
									R
		2026.01		2025.89	-0.1239	-61	399	416	SMAHVAGYCKNIVGLPH					Carbamidomethyl (C)[9], Oxidation (M)[2]						Mascot
									R
		2225.2		2225.12	-0.0742	-33	201	221	GPGDLSVGPSIWKEVGL											Mascot
									SIWK
		2838.35		2838.41	0.0537	19	144	167	FFAPQYSSNILCASRSFF					Oxidation (M)[21]						Mascot
									FFMGVR
	8	hypothetical protein Csa_5G097460 [Cucumis sativus]										KGN49740.1		32486.2	8.89		10	40	0
Project 1\Sample project20170120\R17064-3																				49	of	108
		Protein Group
		PREDICTED: protein AIG1-like [Cucumis sativus]										XP_011654528.1		32486.2		8.89
																3433
																2275
		Peptide Information
		Calc. Mass		Obsrv. Mass	± da	± ppm	Start	End	Sequence			Ion	C. I. %	Modification					Rank	Result Type
							Seq.	Seq.				Score
		894.45		894.468	0.0176	20	165	171	CLVFNNK					Carbamidomethyl (C)[1]						Mascot
		1008.48		1008.54	0.0666	66	42	50	SSELQSCVR											Mascot
		1008.57		1008.54	-0.028	-28	112	120	TLQTLFGTK											Mascot
		1136.57		1136.64	0.0639	56	42	51	SSELQSCVRK											Mascot
		1437.73		1437.7	-0.0335	-23	100	111	TRFSEEEIATVR											Mascot
		1443.79		1443.69	-0.0956	-66	149	162	ECPVGLKDIIAASK											Mascot
		1453.85		1453.72	-0.128	-88	87	99	EGIHAIILVFSVR											Mascot
		1503.78		1503.77	-0.0094	-6	222	233	LEQQLEFEIQAR											Mascot
		1533.8		1533.72	-0.0782	-51	13	28	TGNGKSATGNSILGTR											Mascot
		2170.14		2169.96	-0.1836	-85	102	120	FSEEEIATVRTLQTLFGTK											Mascot
	9	hypothetical protein Csa_7G272130 [Cucumis sativus]										KGN44371.1		104136	7.27		20	38	0
		Protein Group
		PREDICTED: pentatricopeptide repeat-containing										XP_011659080.1		104136		7.2699
		protein At5g65560-like [Cucumis sativus]														999809
																2651
		Peptide Information
		Calc. Mass		Obsrv. Mass	± da	± ppm	Start	End	Sequence			Ion	C. I. %	Modification					Rank	Result Type
							Seq.	Seq.				Score
		903.497		903.565	0.0677	75	791	798	ALLIGECK					Carbamidomethyl (C)[7]						Mascot
		945.562		945.58	0.0184	19	54	62	ISTILSSPK											Mascot
		945.562		945.58	0.0184	19	54	62	ISTILSSPK											Mascot
		948.501		948.539	0.0384	40	826	833	ALICALCK					Carbamidomethyl (C)[4,7]						Mascot
		1007.47		1007.51	0.0403	40	869	877	EGETDLCLK											Mascot
		1103.58		1103.54	-0.0353	-32	393	401	FETAFTIFK											Mascot
		1163.64		1163.62	-0.0114	-10	673	681	IDRAFLLCR					Carbamidomethyl (C)[8]						Mascot
		1258.72		1258.67	-0.049	-39	791	801	ALLIGECKNLK					Carbamidomethyl (C)[7]						Mascot
		1296.68		1296.62	-0.0615	-47	124	134	DRLFAPADHVR											Mascot
		1395.66		1395.74	0.0753	54	683	693	MINVGCRPNYR					Carbamidomethyl (C)[6], Oxidation (M)[1]						Mascot
Project 1\Sample project20170120\R17064-3																				50	of	108
		1421.77		1421.7	-0.072	-51	149	160	RVTQFLSEINSK											Mascot
		1421.77		1421.7	-0.072	-51	149	160	RVTQFLSEINSK											Mascot
		1439.62		1439.75	0.1239	86	109	120	HDMSCFVSMLNR											Mascot
		1479.65		1479.8	0.1468	99	638	650	AEDAESLLDEMEK											Mascot
		1639.94		1639.92	-0.0132	-8	126	139	LFAPADHVRILMIK					Oxidation (M)[12]						Mascot
		1663.98		1663.89	-0.0832	-50	76	89	LKPHHVVNILQTHK											Mascot
		1727.75		1727.85	0.0992	57	288	301	LEEAMDMLEEMVQK					Oxidation (M)[5,7]						Mascot
		1760.91		1760.88	-0.0323	-18	460	474	QGNLNNAMRLLEIMK					Oxidation (M)[8]						Mascot
		2046		2045.92	-0.079	-39	869	885	EGETDLCLKLLHVMESR					Carbamidomethyl (C)[7], Oxidation (M)[14]						Mascot
		2064.01		2063.86	-0.1491	-72	441	459	AGSSPNVITYNTLIYGYC											Mascot
									K
		2154.13		2153.97	-0.1626	-75	683	700	MINVGCRPNYRTFGVLLK					Carbamidomethyl (C)[6], Oxidation (M)[1]						Mascot
		2424.35		2424.22	-0.1303	-54	900	921	ELSALDCAIKIPQISQQLGI					Carbamidomethyl (C)[7]						Mascot
									VK
	10	hypothetical protein Csa_6G401370 [Cucumis sativus]										KGN47766.1		84840.4	8.44		16	38	0
		Protein Group
		PREDICTED: CO(2)-response secreted protease-like										XP_011657463.1		84840.4		8.4399
		[Cucumis sativus]														995803
																833
		Peptide Information
		Calc. Mass		Obsrv. Mass	± da	± ppm	Start	End	Sequence			Ion	C. I. %	Modification					Rank	Result Type
							Seq.	Seq.				Score
		894.414		894.468	0.054	60	674	680	QNFTCPK					Carbamidomethyl (C)[5]						Mascot
		938.476		938.442	-0.0344	-37	563	570	KPSNYAMK											Mascot
		1008.46		1008.54	0.0877	87	417	425	NCFPGSLDR											Mascot
		1008.46		1008.54	0.0877	87	417	425	NCFPGSLDR											Mascot
		1056.55		1056.59	0.0474	45	755	763	VSFYGKEAR											Mascot
		1096.48		1096.53	0.0537	49	187	196	GVCMEAPDFK											Mascot
		1103.56		1103.54	-0.0133	-12	259	270	GTARGGGSPSTR											Mascot
		1223.58		1223.61	0.0257	21	417	427	NCFPGSLDRSK											Mascot
		1240.57		1240.65	0.082	66	187	197	GVCMEAPDFKK					Oxidation (M)[4]						Mascot
		1248.64		1248.64	-0.0047	-4	276	289	VCAGVGCSGAAILK											Mascot
		1264.65		1264.66	0.0112	9	368	379	DFQSTVVLGNGK											Mascot
		1296.64		1296.62	-0.0246	-19	670	680	SMLKQNFTCPK											Mascot
		1439.66		1439.75	0.0844	59	589	600	SVYHDWSSSMIK											Mascot
		1449.78		1449.7	-0.0733	-51	82	93	AVVIHQYHHAFK											Mascot
		1727.84		1727.85	0.0148	9	601	615	SALMTTATQYDNQRK											Mascot
Project 1\Sample project20170120\R17064-3																				51	of	108
[truncated: 2,280 more rows]
