# Supplementary material for: The role and proteomic analysis of ethylene in hydrogen gas-induced adventitious rooting development in cucumber (Cucumis sativus L.) explants
Source: PeerJ. 2020 Apr 7;8:e8896. doi: 10.7717/peerj.8896 (PMC7147439; doi:10.7717/peerj.8896)
Supplement: Supplemental Information 9 [file peerj-08-8896-s015.xlt]

## Sheet: Sheet1
Analysis Information
	Report Type			Protein-Peptide Summary by Spot						Analysis Type			Combined (MS+MS/MS)
	Sample Set Name			Sample project20170120						Database			NCBI_cucumis_sat
	Analysis Name			R17064-5						Creation Date			02/24/2017 18:29:05
	Reported By			02/27/2017 13:13:16 - admin						Last Modified			02/24/2017 18:31:32
		MS Acq. : Proc. Methods				(Unspecified) : (Unspecified)
		Interpretation Method				(Unspecified)
Gel Idx/Pos			296/L24						Instr./Gel Origin		BA2151/Sample Project 20170120					Process Status			Analysis Succeeded
Plate [#] Name			[1] Sample Project 20170120						Instrument Sample Name							Spectra			11
Rank		Protein Name						Species				Accession No.		Protein MW		Protein	Pep.	Protein	Protein		Total Ion	Total Ion
																PI	Count	Score	Score		Score	C. I. %
																			C. I. %
	1	hypothetical protein Csa_3G384800 [Cucumis sativus]										KGN57905.1		57575.8	7.21		15	174	100		117	100
		Protein Group
		PREDICTED: 11S globulin subunit beta [Cucumis										XP_011651441.1		57575.8		7.21
		sativus]														381
																4697
		Peptide Information
		Calc. Mass		Obsrv. Mass	± da	± ppm	Start	End	Sequence			Ion	C. I. %	Modification						Rank	Result Type
							Seq.	Seq.				Score
		860.441		860.468	0.0273	32	78	85	CAGVAVQR					Carbamidomethyl (C)[1]							Mascot
		900.479		900.51	0.0314	35	50	57	LDALEPSR												Mascot
		1056.58		1056.58	-0.0043	-4	50	58	LDALEPSRR												Mascot
		1284.69		1284.73	0.0396	31	47	57	LDRLDALEPSR												Mascot
		1390.67		1390.71	0.0332	24	436	448	TNDNAMINTLAGR												Mascot
		1860.12		1859.97	-0.1464	-79	260	275	NIIKVEGQLQVIRPPR												Mascot
		1954.9		1954.96	0.067	34	190	205	AFYLAGNPEEEFPEWR												Mascot
		1954.9		1954.96	0.067	34	190	205	AFYLAGNPEEEFPEWR			58	99.993								Mascot
		1968.87		1968.97	0.1003	51	323	340	ENIGDASRADMYTPEAG					Oxidation (M)[11]							Mascot
									R
		1970.84		1970.96	0.1148	58	307	322	WDDNGLDETICSMRMK					Carbamidomethyl (C)[11]							Mascot
		1986.84		1986.95	0.1194	60	307	322	WDDNGLDETICSMRMK					Carbamidomethyl (C)[11], Oxidation (M)[13]							Mascot
		2058.1		2058.17	0.0684	33	86	103	YIIDPNGLLLPQYTNAPR												Mascot
		2058.1		2058.17	0.0684	33	86	103	YIIDPNGLLLPQYTNAPR			50	99.958								Mascot
Project 1\Sample project20170120\R17064-5				2058.17																1	Mascot	of	96
		2247.02		2247.18	0.1543	69	59	77	IEAEGGIIEMWDPSHEMF												Mascot
									R
		2263.02		2263.09	0.0727	32	59	77	IEAEGGIIEMWDPSHEMF					Oxidation (M)[10]							Mascot
									R
		2371.29		2371.37	0.0774	33	169	189	LIAVVLLDVSNHANQLDF												Mascot
									HPR
		2371.29		2371.37	0.0774	33	169	189	LIAVVLLDVSNHANQLDF			8	0								Mascot
									HPR
		2419.12		2419.22	0.0997	41	58	77	RIEAEGGIIEMWDPSHEM					Oxidation (M)[11]							Mascot
									FR
		2435.11		2435.18	0.0715	29	58	77	RIEAEGGIIEMWDPSHEM					Oxidation (M)[11,18]							Mascot
									FR
		2439.12		2439.2	0.0755	31	115	136	GVVLPGCPETYQESQQS					Carbamidomethyl (C)[7]							Mascot
									AGEFR
		2831.55		2831.3	-0.2471	-87	86	109	YIIDPNGLLLPQYTNAPRL												Mascot
									IYVER
	2	hypothetical protein Csa_3G386310 [Cucumis sativus]										KGN57907.1		56734.5	8.6		11	150	100		117	100
		Protein Group
		PREDICTED: 11S globulin subunit beta-like [Cucumis										XP_004152049.1		56734.5		8.6
		sativus]														3814
																6973
		Peptide Information
		Calc. Mass		Obsrv. Mass	± da	± ppm	Start	End	Sequence			Ion	C. I. %	Modification						Rank	Result Type
							Seq.	Seq.				Score
		895.438		895.477	0.0387	43	37	43	EGQSRYR												Mascot
		1390.67		1390.71	0.0332	24	436	448	TNDNAMINTLAGR												Mascot
		1639.96		1639.96	-0.0049	-3	236	250	VLAEILNINIELASK												Mascot
		1860.12		1859.97	-0.1464	-79	260	275	NIIKVEGQLQVIRPPR												Mascot
		1954.9		1954.96	0.067	34	190	205	AFYLAGNPEEEFPEWR												Mascot
		1954.9		1954.96	0.067	34	190	205	AFYLAGNPEEEFPEWR			58	99.993								Mascot
		1968.87		1968.97	0.1003	51	323	340	ENIGDASRADMYTPEAG					Oxidation (M)[11]							Mascot
									R
		1970.84		1970.96	0.1148	58	307	322	WDDNGLDETICSMRMK					Carbamidomethyl (C)[11]							Mascot
		1986.84		1986.95	0.1194	60	307	322	WDDNGLDETICSMRMK					Carbamidomethyl (C)[11], Oxidation (M)[13]							Mascot
		2058.1		2058.17	0.0684	33	86	103	YIIDPNGLLLPQYTNAPR												Mascot
		2058.1		2058.17	0.0684	33	86	103	YIIDPNGLLLPQYTNAPR			50	99.958								Mascot
		2225.07		2225.18	0.1174	53	476	494	FNREETNLIPPSMSSYRP					Oxidation (M)[13]							Mascot
									A
		2320.06		2320.12	0.062	27	147	168	AGDLFAVPAGSAHWTYN												Mascot
									DGNEK
		2371.29		2371.37	0.0774	33	169	189	LIAVVLLDVSNHANQLDF												Mascot
									HPR
		2371.29		2371.37	0.0774	33	169	189	LIAVVLLDVSNHANQLDF			8	0								Mascot
									HPR
	3	hypothetical protein Csa_4G016460 [Cucumis sativus]										KGN53107.1		108163	7.33		20	49	41.272
		Peptide Information
Project 1\Sample project20170120\R17064-5																				2	of	96
		Calc. Mass		Obsrv. Mass	± da	± ppm	Start	End	Sequence			Ion	C. I. %	Modification						Rank	Result Type
							Seq.	Seq.				Score
		814.435		814.473	0.0381	47	374	380	GRITHCK												Mascot
		1342.78		1342.79	0.0067	5	807	818	FPQGLANLKNLK												Mascot
		1345.72		1345.73	0.0065	5	467	477	HLRYLDISNSK												Mascot
		1381.77		1381.72	-0.0497	-36	424	434	TLICNRQVLHK					Carbamidomethyl (C)[4]							Mascot
		1383.68		1383.8	0.1134	82	518	529	FSMPQTPPHLGR					Oxidation (M)[3]							Mascot
		1439.73		1439.82	0.0881	61	201	213	IMESTLSSHHLGK												Mascot
		1497.76		1497.8	0.0466	31	435	447	TIFDKIANCTCLR												Mascot
		1554.78		1554.87	0.0883	57	435	447	TIFDKIANCTCLR					Carbamidomethyl (C)[9]							Mascot
		1699.9		1699.88	-0.02	-12	416	429	INNAQNLRTLICNR					Carbamidomethyl (C)[12]							Mascot
		1761.92		1761.86	-0.0584	-33	515	529	HLKFSMPQTPPHLGR					Oxidation (M)[6]							Mascot
		1839.05		1838.98	-0.0709	-39	100	115	VRSSISSLSNIFIIFR												Mascot
		1909		1908.89	-0.1126	-59	799	815	FSMNGLQKFPQGLANLK					Oxidation (M)[3]							Mascot
		1940.04		1939.96	-0.077	-40	1	16	MAEFLWTFAVQEVLKK												Mascot
		1963		1962.97	-0.0246	-13	768	784	DLQLCTSIEDLKIVGCR					Carbamidomethyl (C)[5]							Mascot
		1970.11		1969.97	-0.1397	-71	355	370	YFNILLSRSLFQDIIK												Mascot
		1971.07		1970.96	-0.1104	-56	240	257	DLQEELVTRFGGAPLVA												Mascot
									R
		1992.06		1992	-0.0607	-30	440	457	IANCTCLRVLVVDSSITK					Carbamidomethyl (C)[4]							Mascot
		2102.98		2103.11	0.1279	61	600	617	EGNNYNDFEVLEGLQPH												Mascot
									K
		2439.23		2439.2	-0.0266	-11	702	721	FVLSQMPNLEQWEEVVFI					Oxidation (M)[6]							Mascot
									SK
		2461.2		2461.18	-0.0205	-8	324	343	KEELIEMWMAQGFIQLHE					Oxidation (M)[7]							Mascot
									GR
		2831.3		2831.3	0.0012	0	819	842	EMTIIECSQDCDFSPLMQ					Carbamidomethyl (C)[7,11]							Mascot
									LSSLVK
	4	hypothetical protein Csa_6G338110 [Cucumis sativus]										KGN47479.1		26725.4	5.7		9	43	0
		Protein Group
		PREDICTED: pathogen-related protein [Cucumis										XP_011657303.1		26725.4		5.6999
		sativus]														998092
																6514
		Peptide Information
		Calc. Mass		Obsrv. Mass	± da	± ppm	Start	End	Sequence			Ion	C. I. %	Modification						Rank	Result Type
							Seq.	Seq.				Score
		829.34		829.268	-0.0712	-86	1	7	MAYGDEK					Oxidation (M)[1]							Mascot
		1308.6		1308.71	0.1021	78	223	234	AMSSCPVLRNTG					Carbamidomethyl (C)[5], Oxidation (M)[2]							Mascot
		1373.71		1373.7	-0.0044	-3	42	53	TTVWPVGSLEER												Mascot
		1554.73		1554.87	0.1339	86	158	169	FRHWGYMEGPFK												Mascot
		1684.76		1684.92	0.1635	97	117	130	YYNAEKETAESSHR												Mascot
Project 1\Sample project20170120\R17064-5				1684.92																3	Mascot	of	96
		1796.91		1797.04	0.1293	72	194	209	IEGVEFFFDPAELVGK												Mascot
		1969.97		1969.97	0.0058	3	100	116	LGGYNPFLQTSLPDEYR												Mascot
		1976.94		1976.95	0.0085	4	213	231	GPDLDGSVEKAMSSCPV					Oxidation (M)[12]							Mascot
									LR
		1986.91		1986.95	0.046	23	60	75	NFEMEMFHKISPSDFK												Mascot
	5	PREDICTED: putative disease resistance protein RGA3										XP_004152283.2		121328	7.53		21	43	0
		[Cucumis sativus]
		Peptide Information
		Calc. Mass		Obsrv. Mass	± da	± ppm	Start	End	Sequence			Ion	C. I. %	Modification						Rank	Result Type
							Seq.	Seq.				Score
		814.435		814.473	0.0381	47	490	496	GRITHCK												Mascot
		1342.78		1342.79	0.0067	5	923	934	FPQGLANLKNLK												Mascot
		1345.72		1345.73	0.0065	5	583	593	HLRYLDISNSK												Mascot
		1381.77		1381.72	-0.0497	-36	540	550	TLICNRQVLHK					Carbamidomethyl (C)[4]							Mascot
		1383.68		1383.8	0.1134	82	634	645	FSMPQTPPHLGR					Oxidation (M)[3]							Mascot
		1439.73		1439.82	0.0881	61	317	329	IMESTLSSHHLGK												Mascot
		1497.76		1497.8	0.0466	31	551	563	TIFDKIANCTCLR												Mascot
		1554.78		1554.87	0.0883	57	551	563	TIFDKIANCTCLR					Carbamidomethyl (C)[9]							Mascot
		1699.9		1699.88	-0.02	-12	532	545	INNAQNLRTLICNR					Carbamidomethyl (C)[12]							Mascot
		1761.92		1761.86	-0.0584	-33	631	645	HLKFSMPQTPPHLGR					Oxidation (M)[6]							Mascot
		1839.05		1838.98	-0.0709	-39	100	115	VRSSISSLSNIFIIFR												Mascot
		1909		1908.89	-0.1126	-59	915	931	FSMNGLQKFPQGLANLK					Oxidation (M)[3]							Mascot
		1940.04		1939.96	-0.077	-40	1	16	MAEFLWTFAVQEVLKK												Mascot
		1963		1962.97	-0.0246	-13	884	900	DLQLCTSIEDLKIVGCR					Carbamidomethyl (C)[5]							Mascot
		1970.11		1969.97	-0.1397	-71	471	486	YFNILLSRSLFQDIIK												Mascot
		1971.07		1970.96	-0.1104	-56	356	373	DLQEELVTRFGGAPLVA												Mascot
									R
		1985.12		1984.96	-0.1594	-80	238	256	ILGAILQMIKGVSSGLDNR												Mascot
		1992.06		1992	-0.0607	-30	556	573	IANCTCLRVLVVDSSITK					Carbamidomethyl (C)[4]							Mascot
		2103.05		2103.11	0.0517	25	311	329	SFEVGKIMESTLSSHHLG					Oxidation (M)[8]							Mascot
									K
		2439.23		2439.2	-0.0266	-11	818	837	FVLSQMPNLEQWEEVVFI					Oxidation (M)[6]							Mascot
									SK
		2461.2		2461.18	-0.0205	-8	440	459	KEELIEMWMAQGFIQLHE					Oxidation (M)[7]							Mascot
									GR
		2831.3		2831.3	0.0012	0	935	958	EMTIIECSQDCDFSPLMQ					Carbamidomethyl (C)[7,11]							Mascot
									LSSLVK
	6	PREDICTED: uncharacterized protein LOC101214715										XP_004139756.1		83949.7	8.69		17	42	0
		[Cucumis sativus]
		Peptide Information
Project 1\Sample project20170120\R17064-5																				4	of	96
		Calc. Mass		Obsrv. Mass	± da	± ppm	Start	End	Sequence			Ion	C. I. %	Modification						Rank	Result Type
							Seq.	Seq.				Score
		833.43		833.348	-0.082	-98	80	87	AVGTCLNR												Mascot
		843.382		843.451	0.0687	81	662	668	GCFFNAK					Carbamidomethyl (C)[2]							Mascot
		1056.5		1056.58	0.071	67	660	668	NRGCFFNAK												Mascot
		1201.65		1201.64	-0.0044	-4	329	338	GRNDCVLVLR					Carbamidomethyl (C)[5]							Mascot
		1265.62		1265.67	0.0499	39	196	205	KCFNQLNGWR												Mascot
		1320.64		1320.63	-0.0099	-7	514	524	EEKDGITQSWK												Mascot
		1553.87		1553.84	-0.0331	-21	442	454	SLFERLSLLGYQK												Mascot
		1639.81		1639.96	0.1433	87	609	623	SNRSSSIGFLSSNQR												Mascot
		1837.83		1838	0.169	92	311	325	VEEEVVEDQNVEYEK												Mascot
		1909		1908.89	-0.1126	-59	159	175	GLFCNLGDILLFGNKER												Mascot
		1953.98		1953.96	-0.0217	-11	415	432	HAILIGDECQLPAMVESK												Mascot
		1969.08		1968.97	-0.1034	-53	555	573	ISIGVVSPYSAQVAAIEHK												Mascot
		1969.97		1969.97	-0.0009	0	415	432	HAILIGDECQLPAMVESK					Oxidation (M)[14]							Mascot
		1977		1976.95	-0.0503	-25	124	141	RTLACAPTNTAIMQVASR					Carbamidomethyl (C)[5], Oxidation (M)[13]							Mascot
		2342.06		2342.12	0.0601	26	494	513	KFLNGPMFGSYSFMDINE					Oxidation (M)[7,14]							Mascot
									GR
		2371.18		2371.37	0.1856	78	455	474	HLLNVQYRMHPSISCFPN												Mascot
									SK
		2371.18		2371.37	0.1856	78	455	474	HLLNVQYRMHPSISCFPN												Mascot
									SK
		2461.37		2461.18	-0.1872	-76	125	147	TLACAPTNTAIMQVASRF												Mascot
									LLLVK
		2831.3		2831.3	-0.0008	0	206	228	FCFSSMIDFLEGHCVSQY					Carbamidomethyl (C)[2], Oxidation (M)[6]							Mascot
									RTFLK
	7	hypothetical protein Csa_4G181200 [Cucumis sativus]										KGN53887.1		24136.4	9.45		9	39	0
		Peptide Information
		Calc. Mass		Obsrv. Mass	± da	± ppm	Start	End	Sequence			Ion	C. I. %	Modification						Rank	Result Type
							Seq.	Seq.				Score
		860.495		860.468	-0.0268	-31	34	40	IRSITDR												Mascot
		1390.72		1390.71	-0.0171	-12	81	93	QLMGEELSGLSVK												Mascot
		1405.74		1405.74	-0.002	-1	114	125	EKTLSDEITELK												Mascot
		1663.82		1663.86	0.0371	22	94	107	DLQNLESQLEMSLK					Oxidation (M)[11]							Mascot
		1754.84		1754.92	0.0795	45	128	141	GNHMHQENVELYKR												Mascot
		2103.12		2103.11	-0.0137	-7	187	205	QPQPQNNETPGIKLGLQL												Mascot
									Q
		2282.09		2282.12	0.0374	16	46	63	EEQNQLMNSVSELQFWK					Oxidation (M)[7]							Mascot
									R
		2461.17		2461.18	0.0132	5	156	177	AYGPMEIDKTSSSSQQFT												Mascot
									ITNR
		2510.28		2510.21	-0.0713	-28	178	199	YSMPALQLRQPQPQNNE												Mascot
Project 1\Sample project20170120\R17064-5				2510.21																5	Mascot	of	96
									TPGIK
	8	PREDICTED: UPF0505 protein C16orf62 homolog										XP_011658985.1		101964	5.7		16	39	0		4	0
		isoform X1 [Cucumis sativus]
		Peptide Information
		Calc. Mass		Obsrv. Mass	± da	± ppm	Start	End	Sequence			Ion	C. I. %	Modification						Rank	Result Type
							Seq.	Seq.				Score
		843.436		843.451	0.0146	17	798	804	LPYHADK												Mascot
		912.421		912.503	0.0821	90	85	91	EWSSFTR												Mascot
		1107.55		1107.58	0.0341	31	228	236	ICSLPENFK					Carbamidomethyl (C)[2]							Mascot
		1127.56		1127.57	0.0026	2	564	572	MATRNSYIR					Oxidation (M)[1]							Mascot
		1185.55		1185.63	0.08	67	368	376	CMFKNVSQR					Carbamidomethyl (C)[1], Oxidation (M)[2]							Mascot
		1332.69		1332.57	-0.1249	-94	164	175	AWDASDRVTALK												Mascot
		1663.79		1663.86	0.0657	39	337	351	HFITAKETDGSTDNK												Mascot
		1684.77		1684.92	0.1493	89	876	889	LMETAKLCMNESNK					Carbamidomethyl (C)[8], Oxidation (M)[2]							Mascot
		1939.82		1939.96	0.1332	69	239	254	DICQNAKETCHNWFCK												Mascot
		1963.03		1962.97	-0.0511	-26	289	306	LVVMARGLADPLASAYC					Carbamidomethyl (C)[17]							Mascot
									R
		1971.05		1970.96	-0.096	-49	780	797	TGILCAILPLLAACSQNR					Carbamidomethyl (C)[5,14]							Mascot
		2058.15		2058.17	0.0174	8	277	294	FLSDQPVVVTQRLVVMA												Mascot
									R
		2058.15		2058.17	0.0174	8	277	294	FLSDQPVVVTQRLVVMA			4	0								Mascot
									R
		2074.15		2074.15	0	0	277	294	FLSDQPVVVTQRLVVMA					Oxidation (M)[16]							Mascot
									R
		2303.14		2303.16	0.0159	7	295	315	GLADPLASAYCRLYLTHC												Mascot
									AHK
		2342.26		2342.12	-0.1391	-59	352	371	VLLVGVMEPTIEYIIKCMF					Oxidation (M)[7]							Mascot
									K
		2371.14		2371.37	0.2234	94	882	900	LCMNESNKYLQSTFHLLE					Carbamidomethyl (C)[2], Oxidation (M)[3]							Mascot
									K
		2371.14		2371.37	0.2234	94	882	900	LCMNESNKYLQSTFHLLE					Carbamidomethyl (C)[2], Oxidation (M)[3]							Mascot
									K
		2461.1		2461.18	0.0762	31	122	143	SSTGMHSEELEEPQSITE												Mascot
									NEVK
	9	hypothetical protein Csa_5G139350 [Cucumis sativus]										KGN49857.1		40832.5	7.51		14	38	0
		Peptide Information
		Calc. Mass		Obsrv. Mass	± da	± ppm	Start	End	Sequence			Ion	C. I. %	Modification						Rank	Result Type
							Seq.	Seq.				Score
		833.425		833.348	-0.0772	-93	298	304	DESELLK												Mascot
		912.432		912.503	0.0713	78	331	337	IVFCMDK					Carbamidomethyl (C)[4]							Mascot
		1056.52		1056.58	0.0537	51	330	337	KIVFCMDK					Carbamidomethyl (C)[5], Oxidation (M)[6]							Mascot
		1163.54		1163.64	0.1024	88	126	136	GEADEAVTLCR												Mascot
		1262.69		1262.65	-0.0359	-28	213	222	NYVEAERLLR												Mascot
Project 1\Sample project20170120\R17064-5				1262.65																6	Mascot	of	96
		1284.81		1284.73	-0.077	-60	220	230	LLRIGLDIMIK												Mascot
		1332.58		1332.57	-0.0118	-9	97	107	DAETCFLYGEK					Carbamidomethyl (C)[5]							Mascot
		1373.66		1373.7	0.0391	28	331	341	IVFCMDKLGMK					Carbamidomethyl (C)[4], Oxidation (M)[5,10]							Mascot
		1460.67		1460.8	0.1234	84	95	107	GKDAETCFLYGEK												Mascot
		1554.78		1554.87	0.0883	57	108	122	NGKVGMAMYSLANAK												Mascot
		1674.78		1674.81	0.0382	23	111	125	VGMAMYSLANAKCAR					Carbamidomethyl (C)[13], Oxidation (M)[3,5]							Mascot
		1838.84		1838.98	0.1342	73	144	159	DSNDIALDDSTIEKMR					Oxidation (M)[15]							Mascot
		1954.04		1953.96	-0.0798	-41	28	45	KFGEDSSFLITPILGMAK												Mascot
		1970.03		1969.97	-0.0591	-30	28	45	KFGEDSSFLITPILGMAK					Oxidation (M)[16]							Mascot
		2058.03		2058.17	0.1419	69	172	188	ANEGRELLEECLLINER					Carbamidomethyl (C)[11]							Mascot
		2058.03		2058.17	0.1419	69	172	188	ANEGRELLEECLLINER					Carbamidomethyl (C)[11]							Mascot
	10	hypothetical protein Csa_7G412880 [Cucumis sativus]										KGN45037.1		49679.1	9.37		11	38	0
		Protein Group
		PREDICTED: DNA methyltransferase 1-associated										XP_011659406.1		49679.1		9.3699
		protein 1 [Cucumis sativus]														998855
																5908
		Peptide Information
		Calc. Mass		Obsrv. Mass	± da	± ppm	Start	End	Sequence			Ion	C. I. %	Modification						Rank	Result Type
							Seq.	Seq.				Score
		843.447		843.451	0.0034	4	169	174	YYRVSR												Mascot
		1201.61		1201.64	0.0367	31	422	433	LSEAPSSPAQSK												Mascot
		1262.59		1262.65	0.0593	47	382	393	DSPYTEAPGTPK												Mascot
		1276.69		1276.67	-0.0147	-12	156	166	FPSARTVEELK												Mascot
		1390.69		1390.71	0.0154	11	181	194	GSISRESSGNTPAK												Mascot
		1497.65		1497.8	0.1492	100	133	144	EETDQLFDLCER												Mascot
		1605.82		1605.81	-0.0119	-7	68	80	ITWQWLPFSNSAR												Mascot
		1970		1969.97	-0.0305	-15	92	109	VVNGIPPTGDYSFAKYNK												Mascot
		2225.16		2225.18	0.0237	11	307	327	TYALEQMVQAASSSAGL												Mascot
									RTIK
		2303.22		2303.16	-0.0623	-27	38	59	EVYALTGGLAPIMPAIDV					Oxidation (M)[13]							Mascot
									SELK
		2831.49		2831.3	-0.1875	-66	33	59	DGISREVYALTGGLAPIM					Oxidation (M)[18]							Mascot
									PAIDVSELK
Project 1\Sample project20170120\R17064-5																				7	of	96
Gel Idx/Pos			299/M1						Instr./Gel Origin		BA2151/Sample Project 20170120					Process Status			Analysis Succeeded
Plate [#] Name			[1] Sample Project 20170120						Instrument Sample Name							Spectra			11
Rank		Protein Name						Species				Accession No.		Protein MW		Protein	Pep.	Protein	Protein		Total Ion	Total Ion
																PI	Count	Score	Score		Score	C. I. %
																			C. I. %
	1	hypothetical protein Csa_3G384800 [Cucumis sativus]										KGN57905.1		57575.8	7.21		9	314	100		288	100
		Protein Group
		PREDICTED: 11S globulin subunit beta [Cucumis										XP_011651441.1		57575.8		7.21
		sativus]														381
																4697
		Peptide Information
		Calc. Mass		Obsrv. Mass	± da	± ppm	Start	End	Sequence			Ion	C. I. %	Modification						Rank	Result Type
							Seq.	Seq.				Score
		860.441		860.46	0.019	22	78	85	CAGVAVQR					Carbamidomethyl (C)[1]							Mascot
		1952.88		1952.93	0.0485	25	323	340	ENIGDASRADMYTPEAG												Mascot
									R
		1954.9		1954.92	0.0262	13	190	205	AFYLAGNPEEEFPEWR												Mascot
		1954.9		1954.92	0.0262	13	190	205	AFYLAGNPEEEFPEWR			83	100								Mascot
		1968.87		1968.94	0.0661	34	323	340	ENIGDASRADMYTPEAG					Oxidation (M)[11]							Mascot
									R
		1970.84		1970.93	0.0895	45	307	322	WDDNGLDETICSMRMK					Carbamidomethyl (C)[11]							Mascot
		1986.84		1986.92	0.0829	42	307	322	WDDNGLDETICSMRMK					Carbamidomethyl (C)[11], Oxidation (M)[13]							Mascot
		1986.84		1986.92	0.0829	42	307	322	WDDNGLDETICSMRMK					Carbamidomethyl (C)[11], Oxidation (M)[13]							Mascot
		2058.1		2058.12	0.0227	11	86	103	YIIDPNGLLLPQYTNAPR												Mascot
		2058.1		2058.12	0.0227	11	86	103	YIIDPNGLLLPQYTNAPR			112	100								Mascot
		2247.02		2247.07	0.0483	21	59	77	IEAEGGIIEMWDPSHEMF												Mascot
									R
		2263.02		2263.05	0.0305	13	59	77	IEAEGGIIEMWDPSHEMF					Oxidation (M)[10]							Mascot
									R
		2279.01		2279.03	0.0159	7	59	77	IEAEGGIIEMWDPSHEMF					Oxidation (M)[10,17]							Mascot
									R
		2371.29		2371.31	0.0266	11	169	189	LIAVVLLDVSNHANQLDF												Mascot
									HPR
		2371.29		2371.31	0.0266	11	169	189	LIAVVLLDVSNHANQLDF			35	97.144								Mascot
									HPR
		2403.12		2403.23	0.1076	45	58	77	RIEAEGGIIEMWDPSHEM												Mascot
									FR
		2419.12		2419.17	0.0569	24	58	77	RIEAEGGIIEMWDPSHEM					Oxidation (M)[11]							Mascot
									FR
		2435.11		2435.18	0.0647	27	58	77	RIEAEGGIIEMWDPSHEM					Oxidation (M)[11,18]							Mascot
									FR
		2439.12		2439.15	0.0293	12	115	136	GVVLPGCPETYQESQQS					Carbamidomethyl (C)[7]							Mascot
									AGEFR
		2439.12		2439.15	0.0293	12	115	136	GVVLPGCPETYQESQQS			58	99.987	Carbamidomethyl (C)[7]							Mascot
									AGEFR
	2	hypothetical protein Csa_3G386310 [Cucumis sativus]										KGN57907.1		56734.5	8.6		10	301	100		271	100
Project 1\Sample project20170120\R17064-5																				8	of	96
		Protein Group
		PREDICTED: 11S globulin subunit beta-like [Cucumis										XP_004152049.1		56734.5		8.6
		sativus]														3814
																6973
		Peptide Information
		Calc. Mass		Obsrv. Mass	± da	± ppm	Start	End	Sequence			Ion	C. I. %	Modification						Rank	Result Type
							Seq.	Seq.				Score
		895.438		895.456	0.0184	21	37	43	EGQSRYR												Mascot
		1639.96		1639.92	-0.0405	-25	236	250	VLAEILNINIELASK												Mascot
		1952.88		1952.93	0.0485	25	323	340	ENIGDASRADMYTPEAG												Mascot
									R
		1954.9		1954.92	0.0262	13	190	205	AFYLAGNPEEEFPEWR												Mascot
		1954.9		1954.92	0.0262	13	190	205	AFYLAGNPEEEFPEWR			83	100								Mascot
		1968.87		1968.94	0.0661	34	323	340	ENIGDASRADMYTPEAG					Oxidation (M)[11]							Mascot
									R
		1970.84		1970.93	0.0895	45	307	322	WDDNGLDETICSMRMK					Carbamidomethyl (C)[11]							Mascot
		1986.84		1986.92	0.0829	42	307	322	WDDNGLDETICSMRMK					Carbamidomethyl (C)[11], Oxidation (M)[13]							Mascot
		1986.84		1986.92	0.0829	42	307	322	WDDNGLDETICSMRMK					Carbamidomethyl (C)[11], Oxidation (M)[13]							Mascot
		2058.1		2058.12	0.0227	11	86	103	YIIDPNGLLLPQYTNAPR												Mascot
		2058.1		2058.12	0.0227	11	86	103	YIIDPNGLLLPQYTNAPR			112	100								Mascot
		2225.07		2225.14	0.0752	34	476	494	FNREETNLIPPSMSSYRP					Oxidation (M)[13]							Mascot
									A
		2233.11		2233.12	0.009	4	391	409	VQVVNCRGQTVFDGELQ					Carbamidomethyl (C)[6]							Mascot
									QR
		2320.06		2320.08	0.0207	9	147	168	AGDLFAVPAGSAHWTYN												Mascot
									DGNEK
		2320.06		2320.08	0.0207	9	147	168	AGDLFAVPAGSAHWTYN			41	99.371								Mascot
									DGNEK
		2371.29		2371.31	0.0266	11	169	189	LIAVVLLDVSNHANQLDF												Mascot
									HPR
		2371.29		2371.31	0.0266	11	169	189	LIAVVLLDVSNHANQLDF			35	97.144								Mascot
									HPR
	3	hypothetical protein Csa_7G044860 [Cucumis sativus]										KGN43546.1		27346.5	8.77		7	31	0
		Protein Group
		PREDICTED: cysteine-rich repeat secretory protein										XP_004144580.2		27346.5		8.77
		38-like [Cucumis sativus]														4577
																6367
		Peptide Information
		Calc. Mass		Obsrv. Mass	± da	± ppm	Start	End	Sequence			Ion	C. I. %	Modification						Rank	Result Type
							Seq.	Seq.				Score
		1954.91		1954.92	0.0122	6	98	114	TCVTSAGQDIQQRCPYK					Carbamidomethyl (C)[2]							Mascot
		1954.91		1954.92	0.0122	6	98	114	TCVTSAGQDIQQRCPYK					Carbamidomethyl (C)[2]							Mascot
		1959.96		1959.93	-0.0382	-19	116	132	GAAIWYDSCLLKYSNAK					Carbamidomethyl (C)[9]							Mascot
		2057.94		2058.12	0.1819	88	233	250	VVGGSCNFRYETYPFFT												Mascot
									A
Project 1\Sample project20170120\R17064-5																				9	of	96
		2057.94		2058.12	0.1819	88	233	250	VVGGSCNFRYETYPFFT												Mascot
									A
		2239.03		2239.13	0.103	46	211	232	CLDDAIAELPYCCANGAK												Mascot
									VGGR
		2247.14		2247.07	-0.0672	-30	53	75	QAVDRLTNSAPPSGFGL												Mascot
									SSTGGK
		2336.06		2336.09	0.0254	11	89	110	GDISPNDCKTCVTSAGQ												Mascot
									DIQQR
		2353.07		2353.07	-0.0012	-1	211	232	CLDDAIAELPYCCANGAK					Carbamidomethyl (C)[1,12]							Mascot
									VGGR
		2393.08		2393.23	0.1453	61	89	110	GDISPNDCKTCVTSAGQ					Carbamidomethyl (C)[8]							Mascot
									DIQQR
		2461.12		2461.14	0.0229	9	76	97	DSQNQVNGLALCRGDIS					Carbamidomethyl (C)[12,21]							Mascot
									PNDCK
	4	hypothetical protein Csa_3G418770 [Cucumis sativus]										KGN57986.1		11593.8	9.13		6	28	0
		Peptide Information
		Calc. Mass		Obsrv. Mass	± da	± ppm	Start	End	Sequence			Ion	C. I. %	Modification						Rank	Result Type
							Seq.	Seq.				Score
		927.454		927.505	0.0512	55	1	8	MAGKSMFR												Mascot
		994.462		994.383	-0.0792	-80	92	99	QMERTEGK					Oxidation (M)[2]							Mascot
		1553.71		1553.85	0.1394	90	84	95	NIYTNNDRQMER												Mascot
		2353.25		2353.07	-0.1792	-76	63	83	LAPLCKISFLMGNSIIMSM					Carbamidomethyl (C)[5]							Mascot
									VK
		2401.24		2401.24	0.0039	2	63	83	LAPLCKISFLMGNSIIMSM					Carbamidomethyl (C)[5], Oxidation							Mascot
									VK					(M)[11,17,19]
		2677.31		2677.31	-0.0007	0	69	91	ISFLMGNSIIMSMVKNIYT					Oxidation (M)[5]							Mascot
									NNDR
		2807.46		2807.35	-0.1038	-37	16	40	FLMFFGTLGSIGDGLQVP					Oxidation (M)[3]							Mascot
									LMMYILK
	5	hypothetical protein Csa_7G414520 [Cucumis sativus]										KGN45055.1		36813.5	5.66		8	27	0
		Protein Group
		PREDICTED: cationic peroxidase 2-like [Cucumis										XP_004136141.1		36813.5		5.6599
		sativus]														998474
																1211
		Peptide Information
		Calc. Mass		Obsrv. Mass	± da	± ppm	Start	End	Sequence			Ion	C. I. %	Modification						Rank	Result Type
							Seq.	Seq.				Score
		805.341		805.294	-0.0465	-58	333	338	ECHFRN												Mascot
		1427.86		1427.8	-0.056	-39	320	332	LLVLTGTQGEIRK												Mascot
		1439.69		1439.8	0.1129	78	6	18	CKMQSELSGELAK					Oxidation (M)[3]							Mascot
		1968.98		1968.94	-0.0397	-20	144	161	DSVATLGQFTYDVPSGR												Mascot
									R
		2298.29		2298.13	-0.1665	-72	19	39	IVALLMVGLVMISKGHSQ					Oxidation (M)[6,11]							Mascot
									ELK
		2320.08		2320.08	0.0029	1	198	219	DMVALSGAHSIGRTGCP												Mascot
									EFTDR
		2320.08		2320.08	0.0029	1	198	219	DMVALSGAHSIGRTGCP												Mascot
Project 1\Sample project20170120\R17064-5				2320.08																10	Mascot	of	96
									EFTDR
		2336.08		2336.09	0.01	4	198	219	DMVALSGAHSIGRTGCP					Oxidation (M)[2]							Mascot
									EFTDR
		2342.21		2342.07	-0.1382	-59	40	60	VGFYSETCPLAETIVRTT					Carbamidomethyl (C)[8]							Mascot
									VAK
		2393.1		2393.23	0.1299	54	198	219	DMVALSGAHSIGRTGCP					Carbamidomethyl (C)[16], Oxidation (M)[2]							Mascot
									EFTDR
		2453.22		2453.16	-0.063	-26	220	242	LFSSNGTEITDPSLDPTF												Mascot
									AATLR
	6	PREDICTED: protein GAMETE EXPRESSED 1-like										XP_011652779.1		33788.8	5.67		8	26	0
		[Cucumis sativus]
		Peptide Information
		Calc. Mass		Obsrv. Mass	± da	± ppm	Start	End	Sequence			Ion	C. I. %	Modification						Rank	Result Type
							Seq.	Seq.				Score
		808.368		808.293	-0.0754	-93	79	86	SSESAEAK												Mascot
		1389.71		1389.65	-0.0558	-40	187	198	DEAIDIEKEISK												Mascot
		1699.73		1699.84	0.1105	65	163	176	SLEEGMEMLHNSYK					Oxidation (M)[6,8]							Mascot
		1823.84		1823.92	0.0772	42	162	176	RSLEEGMEMLHNSYK												Mascot
		1962.88		1962.94	0.0637	32	207	224	MTYLQTTAEDIGNMAGS					Oxidation (M)[1,14]							Mascot
									K
		2239.16		2239.13	-0.0242	-11	225	242	LQQLAEYGHRQQEELLQ												Mascot
									R
		2393.02		2393.23	0.21	88	1	20	MNPSKHYTVAEYSMEGF					Oxidation (M)[1]							Mascot
									DDR
		2748.29		2748.35	0.0659	24	199	224	VGDAMSLKMTYLQTTAE					Oxidation (M)[5]							Mascot
									DIGNMAGSK
	7	hypothetical protein Csa_5G571490 [Cucumis sativus]										KGN51506.1		62119.8	9.24		11	26	0
		Protein Group
		PREDICTED: pentatricopeptide repeat-containing										XP_004150483.1		62119.8		9.2399
		protein At1g71060, mitochondrial [Cucumis sativus]														997711
																1816
		Peptide Information
		Calc. Mass		Obsrv. Mass	± da	± ppm	Start	End	Sequence			Ion	C. I. %	Modification						Rank	Result Type
							Seq.	Seq.				Score
		895.507		895.456	-0.0506	-57	97	103	FCKLISK					Carbamidomethyl (C)[2]							Mascot
		1097.6		1097.56	-0.032	-29	70	78	IEHSKQDLK												Mascot
		1389.66		1389.65	-0.003	-2	418	428	EAYSVFQRMSR					Oxidation (M)[9]							Mascot
		1567.67		1567.77	0.1018	65	381	392	MAYAYRMVDEMR					Oxidation (M)[1,7]							Mascot
		1968.92		1968.94	0.0158	8	83	99	SIVESDEIAQDAEKFCK					Carbamidomethyl (C)[16]							Mascot
		2199.02		2199.08	0.0559	25	426	444	MSREPGCEPTLSTYDIMI												Mascot
									R
		2261.09		2261.09	-0.0019	-1	288	307	DEGFEPDVVTFGILINAH					Carbamidomethyl (C)[19]							Mascot
									CK
		2349.18		2349.17	-0.0171	-7	466	486	GVLPGMHLFSTLINSLCH					Oxidation (M)[6]							Mascot
									EHK
		2461.07		2461.14	0.0769	31	445	463	MFCNEERVDMAIQIWDE					Carbamidomethyl (C)[3], Oxidation (M)[1]							Mascot
Project 1\Sample project20170120\R17064-5				2461.14																11	Mascot	of	96
									MK
		2677.27		2677.31	0.0391	15	285	307	EMRDEGFEPDVVTFGILI					Carbamidomethyl (C)[22]							Mascot
									NAHCK
		2807.21		2807.35	0.1403	50	429	451	EPGCEPTLSTYDIMIRMF					Carbamidomethyl (C)[4], Oxidation (M)[14]							Mascot
									CNEER
	8	hypothetical protein Csa_5G608300 [Cucumis sativus]										KGN52042.1		35730.3	9.68		8	25	0
		Protein Group
		PREDICTED: coiled-coil domain-containing protein 130										XP_004135117.1		35730.3		9.68
		[Cucumis sativus]														3051
																7578
		Peptide Information
		Calc. Mass		Obsrv. Mass	± da	± ppm	Start	End	Sequence			Ion	C. I. %	Modification						Rank	Result Type
							Seq.	Seq.				Score
		860.484		860.46	-0.0239	-28	266	272	LDLESKR												Mascot
		863.364		863.284	-0.0803	-93	178	184	HADDYSR												Mascot
		912.465		912.479	0.0139	15	86	92	IWSFTMK												Mascot
		1952.96		1952.93	-0.0323	-17	77	92	QVGNYYSTKIWSFTMK												Mascot
		1968.95		1968.94	-0.0147	-7	77	92	QVGNYYSTKIWSFTMK					Oxidation (M)[15]							Mascot
		2079.88		2080.04	0.1624	78	50	67	FEMPYNIWCGGCNSMIA					Oxidation (M)[3]							Mascot
									K
		2247.13		2247.07	-0.0601	-27	209	230	MGLGIRLLPATQEDSAAA												Mascot
									ACMK
		2263.12		2263.05	-0.0779	-34	209	230	MGLGIRLLPATQEDSAAA					Oxidation (M)[1]							Mascot
									ACMK
		2279.12		2279.03	-0.0925	-41	209	230	MGLGIRLLPATQEDSAAA					Oxidation (M)[1,21]							Mascot
									ACMK
		2284.1		2284.14	0.0339	15	2	21	SSLAAARADNFYYPPEW												Mascot
									TPK
		2320.15		2320.08	-0.0621	-27	209	230	MGLGIRLLPATQEDSAAA					Carbamidomethyl (C)[20], Oxidation (M)[1]							Mascot
									ACMK
		2320.15		2320.08	-0.0621	-27	209	230	MGLGIRLLPATQEDSAAA					Carbamidomethyl (C)[20], Oxidation (M)[1]							Mascot
									ACMK
		2336.14		2336.09	-0.0547	-23	209	230	MGLGIRLLPATQEDSAAA					Carbamidomethyl (C)[20], Oxidation (M)[1,21]							Mascot
									ACMK
		2415.14		2415.2	0.0583	24	1	21	MSSLAAARADNFYYPPE												Mascot
									WTPK
	9	hypothetical protein Csa_4G594470 [Cucumis sativus]										KGN54913.1		27289.7	5.7		7	24	0
		Protein Group
		PREDICTED: proteasome subunit alpha type-3										XP_004144647.1		27289.7		5.6999
		[Cucumis sativus]														998092
																6514
		Peptide Information
		Calc. Mass		Obsrv. Mass	± da	± ppm	Start	End	Sequence			Ion	C. I. %	Modification						Rank	Result Type
							Seq.	Seq.				Score
		843.493		843.429	-0.064	-76	188	195	QGVIEVAK												Mascot
		860.509		860.46	-0.049	-57	174	180	TEIEKLK												Mascot
Project 1\Sample project20170120\R17064-5																				12	of	96
		1479.77		1479.81	0.0489	33	53	65	LITSKMMLPGSNR					Oxidation (M)[6,7]							Mascot
		1959.93		1959.93	-0.0042	-2	2	20	SSIGTGYDLSVTTFSPDG												Mascot
									R
		1969.08		1968.94	-0.1376	-70	188	205	QGVIEVAKIIYGVHDEAK												Mascot
		2040.07		2040.08	0.0109	5	67	86	IHAIHRHSGMAVAGLAAD												Mascot
									GR
		2453.18		2453.16	-0.0266	-11	94	115	SEASNYESVYGEPIPVKE												Mascot
									LADR
	10	hypothetical protein Csa_2G385050 [Cucumis sativus]										KGN63036.1		5567.9	11.4		3	24	0
		Peptide Information
		Calc. Mass		Obsrv. Mass	± da	± ppm	Start	End	Sequence			Ion	C. I. %	Modification						Rank	Result Type
							Seq.	Seq.				Score
		1953.04		1952.93	-0.1195	-61	1	17	MDILLRPAHTSNLRGSR					Oxidation (M)[1]							Mascot
		2263.12		2263.05	-0.0713	-32	31	51	CPTATFLLIGLNTHHSPE												Mascot
									PQS
		2320.14		2320.08	-0.0555	-24	31	51	CPTATFLLIGLNTHHSPE					Carbamidomethyl (C)[1]							Mascot
									PQS
		2320.14		2320.08	-0.0555	-24	31	51	CPTATFLLIGLNTHHSPE					Carbamidomethyl (C)[1]							Mascot
									PQS
		2419.22		2419.17	-0.045	-19	30	51	RCPTATFLLIGLNTHHSP												Mascot
									EPQS
Project 1\Sample project20170120\R17064-5																				13	of	96
Gel Idx/Pos			300/M2						Instr./Gel Origin		BA2151/Sample Project 20170120					Process Status			Analysis Succeeded
Plate [#] Name			[1] Sample Project 20170120						Instrument Sample Name							Spectra			11
Rank		Protein Name						Species				Accession No.		Protein MW		Protein	Pep.	Protein	Protein		Total Ion	Total Ion
																PI	Count	Score	Score		Score	C. I. %
																			C. I. %
	1	hypothetical protein Csa_3G386810 [Cucumis sativus]										KGN57908.1		54382	5.71		10	278	100		244	100
		Protein Group
		PREDICTED: 11S globulin seed storage protein 2-like										XP_011652795.1		54382		5.71
		[Cucumis sativus]														381
																4697
		Peptide Information
		Calc. Mass		Obsrv. Mass	± da	± ppm	Start	End	Sequence			Ion	C. I. %	Modification						Rank	Result Type
							Seq.	Seq.				Score
		867.527		867.529	0.0019	2	47	53	VRPPSRR												Mascot
		1097.53		1097.53	-0.0015	-1	33	41	FTTEAQLCK					Carbamidomethyl (C)[8]							Mascot
		1351.81		1351.81	0.0017	1	81	92	NIIRPNSLSLPK												Mascot
		1351.81		1351.81	0.0017	1	81	92	NIIRPNSLSLPK												Mascot
		1453.74		1453.71	-0.0265	-18	33	44	FTTEAQLCKLDK					Carbamidomethyl (C)[8]							Mascot
		1736.79		1736.87	0.087	50	285	300	RGEDSNGIEETVCTAR												Mascot
		2890.32		2890.34	0.0227	8	361	385	MVYVVDGEAEIQISDDYG												Mascot
									NQVFNER
		2981.35		2981.36	0.012	4	54	80	IESEGGITELWDEADEEF					Carbamidomethyl (C)[20]							Mascot
									QCAGVGAIR
		2981.35		2981.36	0.012	4	54	80	IESEGGITELWDEADEEF			172	100	Carbamidomethyl (C)[20]							Mascot
									QCAGVGAIR
		3119.54		3119.53	-0.018	-6	389	415	GNMFVIPQFYPALARAG					Oxidation (M)[3]							Mascot
									QEGFEWVTFK
		3137.45		3137.45	0.0034	1	53	80	RIESEGGITELWDEADEE					Carbamidomethyl (C)[21]							Mascot
									FQCAGVGAIR
		3137.45		3137.45	0.0034	1	53	80	RIESEGGITELWDEADEE			73	100	Carbamidomethyl (C)[21]							Mascot
									FQCAGVGAIR
		3151.47		3151.45	-0.0193	-6	334	360	FLGMSAEKGHLFANAQH					Oxidation (M)[4]							Mascot
									NLHWSMTDHR
	2	ribulose-1,5-bisphosphate carboxylase small subunit										CCF55356.1		20713.2	8.24		9	52	66.975
		[Cucumis sativus]
		Peptide Information
		Calc. Mass		Obsrv. Mass	± da	± ppm	Start	End	Sequence			Ion	C. I. %	Modification						Rank	Result Type
							Seq.	Seq.				Score
		914.4		914.407	0.0062	7	117	124	SPGYYDGR												Mascot
		914.4		914.407	0.0062	7	117	124	SPGYYDGR												Mascot
		919.5		919.504	0.004	4	160	167	VIGFDNVR												Mascot
		937.562		937.565	0.0028	3	62	69	VWPPLGLR												Mascot
Project 1\Sample project20170120\R17064-5																				14	of	96
		968.451		968.456	0.0056	6	88	94	ECDYLLR					Carbamidomethyl (C)[2]							Mascot
		1010.49		1010.5	0.0017	2	152	159	EYPDAFIR												Mascot
		2146.04		2146	-0.0376	-18	70	87	KFETLSYLPDMSNEQLSK					Oxidation (M)[11]							Mascot
		2225.05		2225.11	0.0615	28	131	150	LPMFGCTDSSQVIQEIEE												Mascot
									AK
		2298.06		2298.14	0.0798	35	131	150	LPMFGCTDSSQVIQEIEE					Carbamidomethyl (C)[6], Oxidation (M)[3]							Mascot
									AK
		2353.14		2353.05	-0.0899	-38	131	151	LPMFGCTDSSQVIQEIEE												Mascot
									AKK
		2353.14		2353.05	-0.0899	-38	131	151	LPMFGCTDSSQVIQEIEE												Mascot
									AKK
		2369.14		2369.09	-0.05	-21	131	151	LPMFGCTDSSQVIQEIEE					Oxidation (M)[3]							Mascot
									AKK
		2964.53		2964.35	-0.1814	-61	2	32	ASSILSSAVVASVNSASP					Oxidation (M)[23]							Mascot
									AQASMVAPFTGLK
	3	hypothetical protein Csa_5G609710 [Cucumis sativus]										KGN52085.1		20685.2	8.24		8	42	0
		Protein Group
		PREDICTED: ribulose bisphosphate carboxylase small										XP_004135094.1		20685.2		8.2399
		chain, chloroplastic [Cucumis sativus]														997711
																1816
		Peptide Information
		Calc. Mass		Obsrv. Mass	± da	± ppm	Start	End	Sequence			Ion	C. I. %	Modification						Rank	Result Type
							Seq.	Seq.				Score
		914.4		914.407	0.0062	7	117	124	SPGYYDGR												Mascot
		914.4		914.407	0.0062	7	117	124	SPGYYDGR												Mascot
		919.5		919.504	0.004	4	160	167	VIGFDNVR												Mascot
		937.562		937.565	0.0028	3	62	69	VWPPLGLR												Mascot
		968.451		968.456	0.0056	6	88	94	ECDYLLR					Carbamidomethyl (C)[2]							Mascot
		1010.49		1010.5	0.0017	2	152	159	EYPDAFIR												Mascot
		2146.04		2146	-0.0376	-18	70	87	KFETLSYLPDMSNEQLSK					Oxidation (M)[11]							Mascot
		2225.05		2225.11	0.0615	28	131	150	LPMFGCTDSSQVIQEIEE												Mascot
									AK
		2298.06		2298.14	0.0798	35	131	150	LPMFGCTDSSQVIQEIEE					Carbamidomethyl (C)[6], Oxidation (M)[3]							Mascot
									AK
		2353.14		2353.05	-0.0899	-38	131	151	LPMFGCTDSSQVIQEIEE												Mascot
									AKK
		2353.14		2353.05	-0.0899	-38	131	151	LPMFGCTDSSQVIQEIEE												Mascot
									AKK
		2369.14		2369.09	-0.05	-21	131	151	LPMFGCTDSSQVIQEIEE					Oxidation (M)[3]							Mascot
									AKK
	4	ribulose bisphosphate carboxylase/oxygenase										AAA33131.1		21049.4	7.55		8	41	0
		precursor peptide [Cucumis sativus]
		Protein Group
		RecName: Full=Ribulose bisphosphate carboxylase										sp|P08474.1|RBS_		21049.4		7.55
		small chain, chloroplastic; Short=RuBisCO small										CUCSA				1907
		subunit; Flags: Precursor														3486
Project 1\Sample project20170120\R17064-5																				15	of	96
		Peptide Information
		Calc. Mass		Obsrv. Mass	± da	± ppm	Start	End	Sequence			Ion	C. I. %	Modification						Rank	Result Type
							Seq.	Seq.				Score
		914.423		914.407	-0.0164	-18	125	130	YWTMWK												Mascot
		914.423		914.407	-0.0164	-18	125	130	YWTMWK												Mascot
		919.5		919.504	0.004	4	160	167	VIGFDNVR												Mascot
		937.562		937.565	0.0028	3	62	69	VWPPLGLR												Mascot
		968.451		968.456	0.0056	6	88	94	ECDYLLR					Carbamidomethyl (C)[2]							Mascot
		1010.49		1010.5	0.0017	2	152	159	EYPDAFIR												Mascot
		2146.04		2146	-0.0376	-18	70	87	KFETLSYLPDMSNEQLSK					Oxidation (M)[11]							Mascot
		2225.05		2225.11	0.0615	28	131	150	LPMFGCTDSSQVIQEIEE												Mascot
									AK
		2298.06		2298.14	0.0798	35	131	150	LPMFGCTDSSQVIQEIEE					Carbamidomethyl (C)[6], Oxidation (M)[3]							Mascot
									AK
		2353.14		2353.05	-0.0899	-38	131	151	LPMFGCTDSSQVIQEIEE												Mascot
									AKK
		2353.14		2353.05	-0.0899	-38	131	151	LPMFGCTDSSQVIQEIEE												Mascot
									AKK
		2369.14		2369.09	-0.05	-21	131	151	LPMFGCTDSSQVIQEIEE					Oxidation (M)[3]							Mascot
									AKK
	5	putative chloroplast ribulose-1,5-bisphosphate										ABN41481.1		10907.3	5.24		5	32	0
		carboxylase/oxygenase small subunit, partial [Cucumis
		sativus]
		Peptide Information
		Calc. Mass		Obsrv. Mass	± da	± ppm	Start	End	Sequence			Ion	C. I. %	Modification						Rank	Result Type
							Seq.	Seq.				Score
		914.4		914.407	0.0062	7	21	28	SPGYYDGR												Mascot
		914.4		914.407	0.0062	7	21	28	SPGYYDGR												Mascot
		919.5		919.504	0.004	4	64	71	VIGFDNVR												Mascot
		1010.49		1010.5	0.0017	2	56	63	EYPDAFIR												Mascot
		2225.05		2225.11	0.0615	28	35	54	LPMFGCTDSSQVIQEIEE												Mascot
									AK
		2298.06		2298.14	0.0798	35	35	54	LPMFGCTDSSQVIQEIEE					Carbamidomethyl (C)[6], Oxidation (M)[3]							Mascot
									AK
		2353.14		2353.05	-0.0899	-38	35	55	LPMFGCTDSSQVIQEIEE												Mascot
									AKK
		2353.14		2353.05	-0.0899	-38	35	55	LPMFGCTDSSQVIQEIEE												Mascot
									AKK
		2369.14		2369.09	-0.05	-21	35	55	LPMFGCTDSSQVIQEIEE					Oxidation (M)[3]							Mascot
									AKK
	6	hypothetical protein Csa_3G194400 [Cucumis sativus]										KGN57473.1		40337.9	5.74		11	31	0
		Peptide Information
		Calc. Mass		Obsrv. Mass	± da	± ppm	Start	End	Sequence			Ion	C. I. %	Modification						Rank	Result Type
							Seq.	Seq.				Score
Project 1\Sample project20170120\R17064-5																				16	of	96
		808.368		808.377	0.0084	10	137	144	SSESAEAK												Mascot
		836.418		836.339	-0.0793	-95	257	264	VGDAMSLK					Oxidation (M)[5]							Mascot
		922.474		922.432	-0.0412	-45	112	119	SLMVECLK												Mascot
		937.485		937.565	0.0796	85	197	203	VYEQSRR												Mascot
		1699.73		1699.81	0.0796	47	221	234	SLEEGMEMLHNSYK					Oxidation (M)[6,8]							Mascot
		1823.84		1823.9	0.055	30	220	234	RSLEEGMEMLHNSYK												Mascot
		1962.88		1962.89	0.0153	8	265	282	MTYLQTTAEDIGNMAGS					Oxidation (M)[1,14]							Mascot
									K
		2102.95		2102.98	0.0215	10	94	111	DCFQKDSGRPPFPSCHP					Carbamidomethyl (C)[2]							Mascot
									K
		2102.95		2102.98	0.0215	10	94	111	DCFQKDSGRPPFPSCHP					Carbamidomethyl (C)[2]							Mascot
									K
		2239.16		2239.11	-0.0505	-23	283	300	LQQLAEYGHRQQEELLQ												Mascot
									R
		2401.15		2401.28	0.1375	57	99	119	DSGRPPFPSCHPKSLMV					Carbamidomethyl (C)[10], Oxidation (M)[16]							Mascot
									ECLK
		2748.29		2748.31	0.0176	6	257	282	VGDAMSLKMTYLQTTAE					Oxidation (M)[5]							Mascot
									DIGNMAGSK
	7	Mitochondrial dicarboxylate carrier protein [Cucumis										KGN48714.1		34210.3	10.04		8	31	0
		sativus]
		Protein Group
		PREDICTED: mitochondrial uncoupling protein 5										XP_004143448.1		34210.3		10.039
		[Cucumis sativus]														999961
																853
		Peptide Information
		Calc. Mass		Obsrv. Mass	± da	± ppm	Start	End	Sequence			Ion	C. I. %	Modification						Rank	Result Type
							Seq.	Seq.				Score
		867.541		867.529	-0.0121	-14	75	83	VGPIAVGVR												Mascot
		968.512		968.456	-0.0559	-58	112	119	MGLYDILK					Oxidation (M)[1]							Mascot
		1351.7		1351.81	0.1035	77	283	294	TVRAEGPMALYK					Oxidation (M)[8]							Mascot
		1351.7		1351.81	0.1035	77	283	294	TVRAEGPMALYK					Oxidation (M)[8]							Mascot
		1576.78		1576.72	-0.0559	-35	122	134	WTDQDTGKMPLIR					Oxidation (M)[9]							Mascot
		2146.1		2146	-0.0964	-45	265	285	VEAGAAPPYSGALDCAL					Carbamidomethyl (C)[15]							Mascot
									KTVR
		2336.14		2336.09	-0.0515	-22	260	282	VMNMKVEAGAAPPYSGA												Mascot
									LDCALK
		2995.62		2995.37	-0.2542	-85	84	111	IVQQEGVAALFSGVSATV												Mascot
									LRQTLYSTTR
		3159.65		3159.44	-0.2154	-68	226	257	GLMKDGLGTHVTASFAA												Mascot
									GFVASVASNPVDVIK
	8	hypothetical protein Csa_2G061570 [Cucumis sativus]										KGN61178.1		136734	8.79		17	30	0
		Protein Group
		PREDICTED: DNA ligase 4 isoform X2 [Cucumis										XP_011648960.1		136734		8.7899
		sativus]														999618
																5303
Project 1\Sample project20170120\R17064-5																				17	of	96
		Peptide Information
		Calc. Mass		Obsrv. Mass	± da	± ppm	Start	End	Sequence			Ion	C. I. %	Modification						Rank	Result Type
							Seq.	Seq.				Score
		803.452		803.43	-0.0223	-28	573	578	FPRIDR												Mascot
		914.466		914.407	-0.06	-66	487	493	RFVSFCR												Mascot
		914.466		914.407	-0.06	-66	487	493	RFVSFCR												Mascot
		1163.54		1163.62	0.0761	65	608	618	GTNNSGRQDSK												Mascot
		1351.75		1351.81	0.0606	45	1201	1212	VSYKDVASELLK												Mascot
		1351.75		1351.81	0.0606	45	1201	1212	VSYKDVASELLK												Mascot
		1639.86		1639.93	0.0678	41	562	575	SEVFAAPYSLRFPR												Mascot
		1838.91		1838.9	-0.0144	-8	309	324	SLNRFAEFGSNQEIAR												Mascot
		1940.98		1940.9	-0.0777	-40	446	464	AGSDLDALIIGGYYGSGR												Mascot
									R
		1948.96		1948.95	-0.0129	-7	297	312	CILDGEMLVWDKSLNR					Carbamidomethyl (C)[1]							Mascot
		2146.17		2146	-0.1699	-79	2	19	PEPIKFAVLSSLFDWIQR												Mascot
		2222.08		2222.08	-0.0081	-4	883	900	IHIIAHQWLEDCLEMAQR					Oxidation (M)[15]							Mascot
		2224.99		2225.11	0.1191	54	952	971	NEAASGQQMLSHSTERY					Oxidation (M)[9]							Mascot
									DGK
		2233.04		2233.09	0.0466	21	796	812	QDWCMFVGCQIYFLPLR					Carbamidomethyl (C)[4,9]							Mascot
		2298.16		2298.14	-0.0159	-7	335	354	QLCYVAFDVLYVGDTSVI												Mascot
									HR
		2690.33		2690.36	0.03	11	796	816	QDWCMFVGCQIYFLPLR					Carbamidomethyl (C)[4,9], Oxidation (M)[5]							Mascot
									LSLK
		2721.31		2721.28	-0.0312	-11	677	702	LIVENGGTFSMNLNNSVT					Oxidation (M)[11]							Mascot
									HSVAADSK
		2922.43		2922.37	-0.0562	-19	523	547	TAPSFYQVTNNSKERPD												Mascot
									VWIESPEK
		3003.52		3003.32	-0.1973	-66	677	705	LIVENGGTFSMNLNNSVT												Mascot
									HSVAADSKGIK
	9	cytochrome P450 [Cucumis sativus]										AIY67847.1		57600.9	6.88		10	29	0
		Protein Group
		PREDICTED: cytochrome P450 81E8 [Cucumis sativus]										XP_004140662.1		57600.9		6.88
																1144
																4092
		hypothetical protein Csa_6G088180 [Cucumis sativus]										KGN46390.1		57600.9		6.88
																1144
																4092
		Peptide Information
		Calc. Mass		Obsrv. Mass	± da	± ppm	Start	End	Sequence			Ion	C. I. %	Modification						Rank	Result Type
							Seq.	Seq.				Score
		834.348		834.318	-0.0299	-36	259	265	NEEEGEK												Mascot
		1163.52		1163.62	0.093	80	441	451	RACPGMGMANR												Mascot
		1514.78		1514.75	-0.0324	-21	266	278	GNTMISHLLCLQK					Carbamidomethyl (C)[10]							Mascot
Project 1\Sample project20170120\R17064-5																				18	of	96
		1530.78		1530.73	-0.0435	-28	266	278	GNTMISHLLCLQK					Carbamidomethyl (C)[10], Oxidation (M)[4]							Mascot
		1567.7		1567.74	0.0471	30	473	486	EIDMTEGQGISMPK					Oxidation (M)[4,12]							Mascot
		1820.88		1820.89	0.008	4	399	413	DPKVWEDSTSFKPER												Mascot
		2103.1		2102.98	-0.1226	-58	173	190	SLFSELTFNIIMRMLAGK					Oxidation (M)[12,14]							Mascot
		2103.1		2102.98	-0.1226	-58	173	190	SLFSELTFNIIMRMLAGK					Oxidation (M)[12,14]							Mascot
		2401.18		2401.28	0.1055	44	238	257	VESLGKDTDWFLQNLVD												Mascot
									EHR
		2981.47		2981.36	-0.1157	-39	266	290	GNTMISHLLCLQKTQPDY					Carbamidomethyl (C)[10]							Mascot
									YTDEIIK
		2981.47		2981.36	-0.1157	-39	266	290	GNTMISHLLCLQKTQPDY					Carbamidomethyl (C)[10]							Mascot
									YTDEIIK
		3013.36		3013.36	-0.0017	-1	414	440	FESDHQGREGSNNNNN												Mascot
									GYSFLPFGLGR
		3094.66		3094.48	-0.1851	-60	1	26	MEMEAITYLPFLITFLALV					Oxidation (M)[1]							Mascot
									SIFFIQK
	10	hypothetical protein Csa_1G031800 [Cucumis sativus]										KGN63959.1		24310.2	8.22		7	29	0
		Protein Group
		PREDICTED: chemocyanin-like [Cucumis sativus]										XP_004137571.1		24310.2		8.22
																2670
																2881
		Peptide Information
		Calc. Mass		Obsrv. Mass	± da	± ppm	Start	End	Sequence			Ion	C. I. %	Modification						Rank	Result Type
							Seq.	Seq.				Score
		907.391		907.322	-0.0697	-77	192	198	TCPMNWR												Mascot
		1285.68		1285.67	-0.0109	-8	1	11	MEALRPGWAVR												Mascot
		1453.78		1453.71	-0.0707	-49	64	75	YLPVHDVLEVNR												Mascot
		1569.89		1569.74	-0.1532	-98	12	24	MIIVMVITAIFFR					Oxidation (M)[1]							Mascot
		1639.8		1639.93	0.1259	77	76	88	TDFFNCRTVNPIR					Carbamidomethyl (C)[6]							Mascot
		1838.89		1838.9	0.0136	7	106	120	YFICGRPQHCLMGLK					Carbamidomethyl (C)[4], Oxidation (M)[12]							Mascot
		2721.51		2721.28	-0.2258	-83	2	24	EALRPGWAVRMIIVMVIT					Oxidation (M)[11,15]							Mascot
									AIFFR
Project 1\Sample project20170120\R17064-5																				19	of	96
Gel Idx/Pos			301/M3						Instr./Gel Origin		BA2151/Sample Project 20170120					Process Status			Analysis Succeeded
Plate [#] Name			[1] Sample Project 20170120						Instrument Sample Name							Spectra			11
Rank		Protein Name						Species				Accession No.		Protein MW		Protein	Pep.	Protein	Protein		Total Ion	Total Ion
																PI	Count	Score	Score		Score	C. I. %
																			C. I. %
	1	hypothetical protein Csa_3G386810 [Cucumis sativus]										KGN57908.1		54382	5.71		9	189	100		159	100
		Protein Group
		PREDICTED: 11S globulin seed storage protein 2-like										XP_011652795.1		54382		5.71
		[Cucumis sativus]														381
																4697
		Peptide Information
		Calc. Mass		Obsrv. Mass	± da	± ppm	Start	End	Sequence			Ion	C. I. %	Modification						Rank	Result Type
							Seq.	Seq.				Score
		1097.53		1097.54	0.0056	5	33	41	FTTEAQLCK					Carbamidomethyl (C)[8]							Mascot
		1351.81		1351.8	-0.005	-4	81	92	NIIRPNSLSLPK												Mascot
		1400.7		1400.69	-0.0057	-4	30	41	GFRFTTEAQLCK												Mascot
		2581.41		2581.36	-0.0439	-17	1	23	MAVKVLLAILLCFFACESL					Carbamidomethyl (C)[12]							Mascot
									VNAR
		2890.32		2890.33	0.0134	5	361	385	MVYVVDGEAEIQISDDYG												Mascot
									NQVFNER
		2981.35		2981.35	0.0008	0	54	80	IESEGGITELWDEADEEF					Carbamidomethyl (C)[20]							Mascot
									QCAGVGAIR
		2981.35		2981.35	0.0008	0	54	80	IESEGGITELWDEADEEF			139	100	Carbamidomethyl (C)[20]							Mascot
									QCAGVGAIR
		3119.54		3119.51	-0.0349	-11	389	415	GNMFVIPQFYPALARAG					Oxidation (M)[3]							Mascot
									QEGFEWVTFK
		3137.45		3137.43	-0.0173	-6	53	80	RIESEGGITELWDEADEE					Carbamidomethyl (C)[21]							Mascot
									FQCAGVGAIR
		3137.45		3137.43	-0.0173	-6	53	80	RIESEGGITELWDEADEE			21	34.91	Carbamidomethyl (C)[21]							Mascot
									FQCAGVGAIR
		3151.47		3151.43	-0.0418	-13	334	360	FLGMSAEKGHLFANAQH					Oxidation (M)[4]							Mascot
									NLHWSMTDHR
	2	ribulose bisphosphate carboxylase/oxygenase										AAA33131.1		21049.4	7.55		8	42	0
		precursor peptide [Cucumis sativus]
		Protein Group
		RecName: Full=Ribulose bisphosphate carboxylase										sp|P08474.1|RBS_		21049.4		7.55
		small chain, chloroplastic; Short=RuBisCO small										CUCSA				1907
		subunit; Flags: Precursor														3486
		Peptide Information
		Calc. Mass		Obsrv. Mass	± da	± ppm	Start	End	Sequence			Ion	C. I. %	Modification						Rank	Result Type
							Seq.	Seq.				Score
		914.423		914.404	-0.0186	-20	125	130	YWTMWK												Mascot
		919.5		919.498	-0.0014	-2	160	167	VIGFDNVR												Mascot
		1010.49		1010.49	-0.0039	-4	152	159	EYPDAFIR												Mascot
Project 1\Sample project20170120\R17064-5																				20	of	96
		2044.96		2044.99	0.0294	14	95	112	NGWVPCVEFDIGSGFVY												Mascot
									R
		2101.98		2101.97	-0.0086	-4	95	112	NGWVPCVEFDIGSGFVY					Carbamidomethyl (C)[6]							Mascot
									R
		2225.05		2225.09	0.0434	20	131	150	LPMFGCTDSSQVIQEIEE												Mascot
									AK
		2298.06		2298.1	0.0408	18	131	150	LPMFGCTDSSQVIQEIEE					Carbamidomethyl (C)[6], Oxidation (M)[3]							Mascot
									AK
		2353.14		2353.04	-0.1062	-45	131	151	LPMFGCTDSSQVIQEIEE												Mascot
									AKK
		2353.14		2353.04	-0.1062	-45	131	151	LPMFGCTDSSQVIQEIEE												Mascot
									AKK
		2557.36		2557.16	-0.1977	-77	168	189	QVQCISFIAYKPQVLLFLS					Carbamidomethyl (C)[4]							Mascot
									SIC
		2581.2		2581.36	0.1587	61	95	116	NGWVPCVEFDIGSGFVY												Mascot
									RENHR
	3	putative chloroplast ribulose-1,5-bisphosphate										ABN41481.1		10907.3	5.24		6	42	0
		carboxylase/oxygenase small subunit, partial [Cucumis
		sativus]
		Peptide Information
		Calc. Mass		Obsrv. Mass	± da	± ppm	Start	End	Sequence			Ion	C. I. %	Modification						Rank	Result Type
							Seq.	Seq.				Score
		914.4		914.404	0.004	4	21	28	SPGYYDGR												Mascot
		919.5		919.498	-0.0014	-2	64	71	VIGFDNVR												Mascot
		1010.49		1010.49	-0.0039	-4	56	63	EYPDAFIR												Mascot
		2225.05		2225.09	0.0434	20	35	54	LPMFGCTDSSQVIQEIEE												Mascot
									AK
		2298.06		2298.1	0.0408	18	35	54	LPMFGCTDSSQVIQEIEE					Carbamidomethyl (C)[6], Oxidation (M)[3]							Mascot
									AK
		2353.14		2353.04	-0.1062	-45	35	55	LPMFGCTDSSQVIQEIEE												Mascot
									AKK
		2353.14		2353.04	-0.1062	-45	35	55	LPMFGCTDSSQVIQEIEE												Mascot
									AKK
		2557.36		2557.16	-0.1977	-77	72	93	QVQCISFIAYKPQVLLFLS					Carbamidomethyl (C)[4]							Mascot
									SIC
	4	hypothetical protein Csa_1G528460 [Cucumis sativus]										KGN65781.1		52911	5.61		12	40	0
		Protein Group
		PREDICTED: cytosolic enolase 3 [Cucumis sativus]										XP_004145264.1		52911		5.61
																1335
																144
		Peptide Information
		Calc. Mass		Obsrv. Mass	± da	± ppm	Start	End	Sequence			Ion	C. I. %	Modification						Rank	Result Type
							Seq.	Seq.				Score
		800.383		800.35	-0.033	-41	307	312	YDLDFK												Mascot
		1514.77		1514.74	-0.025	-17	36	48	TPDPVLFISNHMK					Oxidation (M)[12]							Mascot
		1514.77		1514.74	-0.025	-17	36	48	TPDPVLFISNHMK					Oxidation (M)[12]							Mascot
		1566.71		1566.77	0.0599	38	133	145	DPTQQYEIDQAMK												Mascot
Project 1\Sample project20170120\R17064-5																				21	of	96
		1627.78		1627.74	-0.0425	-26	292	306	IAIDVAATNFCMGTK					Carbamidomethyl (C)[11], Oxidation (M)[12]							Mascot
		1923.88		1923.93	0.0488	25	8	22	EMSVQEYLDKYMLSR					Oxidation (M)[2,12]							Mascot
		2106.14		2105.96	-0.1746	-83	208	227	HAGNNLAIQEIMILPIGAS					Oxidation (M)[12]							Mascot
									K
		2233.15		2233.06	-0.0869	-39	357	377	HFSSLGICQVVGGDLLMS												Mascot
									NKK
		2239		2239.07	0.0696	31	464	483	IEEELGDQAIYAGEDWRA												Mascot
									AC
		2352.12		2352.07	-0.0564	-24	292	312	IAIDVAATNFCMGTKYDL					Oxidation (M)[12]							Mascot
									DFK
		2385.08		2385.02	-0.0591	-25	133	152	DPTQQYEIDQAMKDLDTT					Oxidation (M)[12]							Mascot
									EK
		2720.26		2720.28	0.019	7	81	106	GVFHASVPSGDPAGMYE					Oxidation (M)[15]							Mascot
									AVELRDGDK
		2890.36		2890.33	-0.0242	-8	244	271	AVITEKHGAHGCNFGED												Mascot
									GGFAPNISSFK
	5	hypothetical protein Csa_7G390000 [Cucumis sativus]										KGN44819.1		61003.6	9.34		12	37	0
		Protein Group
		PREDICTED: pentatricopeptide repeat-containing										XP_004148903.1		61003.6		9.34
		protein At4g02820, mitochondrial [Cucumis sativus]														1525
																8789
		Peptide Information
		Calc. Mass		Obsrv. Mass	± da	± ppm	Start	End	Sequence			Ion	C. I. %	Modification						Rank	Result Type
							Seq.	Seq.				Score
		807.392		807.326	-0.0653	-81	168	174	AEALMEK					Oxidation (M)[5]							Mascot
		914.411		914.404	-0.0067	-7	175	182	MSECGFLK												Mascot
		1010.48		1010.49	0.0073	7	138	145	FFEDLPDK												Mascot
		1566.83		1566.77	-0.0605	-39	357	370	DTRVSNVMLGAYIK												Mascot
		1792.81		1792.81	-0.0022	-1	321	335	MSDREYMCMISSLVK												Mascot
		2058.05		2057.99	-0.0649	-32	111	128	DMRLVPGDYAVHLDLICK												Mascot
		2081.12		2080.97	-0.1548	-74	286	304	SNRLSLSSLLSLYTNLGD												Mascot
									K
		2143.96		2143.95	-0.0059	-3	17	38	FSGEASMAASENTALEG					Oxidation (M)[7]							Mascot
									AAGTR
		2339.22		2339.13	-0.0837	-36	183	202	SPLSFNHMLSLHISNKQL					Oxidation (M)[8]							Mascot
									EK
		2554.1		2554.21	0.1142	45	509	531	MCVSEVSSTLYDKTDQM					Oxidation (M)[1]							Mascot
									DSIQSA
		2720.34		2720.28	-0.0545	-20	175	198	MSECGFLKSPLSFNHML												Mascot
									SLHISNK
		2890.4		2890.33	-0.0632	-22	388	411	GTVPSYTTWELLTWGYL					Oxidation (M)[22]							Mascot
									KENQMEK
	6	hypothetical protein Csa_5G609710 [Cucumis sativus]										KGN52085.1		20685.2	8.24		7	34	0
		Protein Group
		PREDICTED: ribulose bisphosphate carboxylase small										XP_004135094.1		20685.2		8.2399
		chain, chloroplastic [Cucumis sativus]														997711
																1816
		ribulose-1,5-bisphosphate carboxylase small subunit										CCF55356.1		20713.2		8.2399
Project 1\Sample project20170120\R17064-5												CCF55356.1								22	of	96
		[Cucumis sativus]														997711
																1816
		Peptide Information
		Calc. Mass		Obsrv. Mass	± da	± ppm	Start	End	Sequence			Ion	C. I. %	Modification						Rank	Result Type
							Seq.	Seq.				Score
		914.4		914.404	0.004	4	117	124	SPGYYDGR												Mascot
		919.5		919.498	-0.0014	-2	160	167	VIGFDNVR												Mascot
		1010.49		1010.49	-0.0039	-4	152	159	EYPDAFIR												Mascot
		2044.96		2044.99	0.0294	14	95	112	NGWVPCVEFDIGSGFVY												Mascot
									R
		2101.98		2101.97	-0.0086	-4	95	112	NGWVPCVEFDIGSGFVY					Carbamidomethyl (C)[6]							Mascot
									R
		2225.05		2225.09	0.0434	20	131	150	LPMFGCTDSSQVIQEIEE												Mascot
									AK
		2298.06		2298.1	0.0408	18	131	150	LPMFGCTDSSQVIQEIEE					Carbamidomethyl (C)[6], Oxidation (M)[3]							Mascot
									AK
		2353.14		2353.04	-0.1062	-45	131	151	LPMFGCTDSSQVIQEIEE												Mascot
									AKK
		2353.14		2353.04	-0.1062	-45	131	151	LPMFGCTDSSQVIQEIEE												Mascot
									AKK
		2581.2		2581.36	0.1587	61	95	116	NGWVPCVEFDIGSGFVY												Mascot
									RENHR
	7	Mitochondrial dicarboxylate carrier protein [Cucumis										KGN48714.1		34210.3	10.04		8	32	0
		sativus]
		Protein Group
		PREDICTED: mitochondrial uncoupling protein 5										XP_004143448.1		34210.3		10.039
		[Cucumis sativus]														999961
																853
		Peptide Information
		Calc. Mass		Obsrv. Mass	± da	± ppm	Start	End	Sequence			Ion	C. I. %	Modification						Rank	Result Type
							Seq.	Seq.				Score
		950.421		950.438	0.0164	17	122	129	WTDQDTGK												Mascot
		1351.7		1351.8	0.0968	72	283	294	TVRAEGPMALYK					Oxidation (M)[8]							Mascot
		1576.78		1576.77	-0.0091	-6	122	134	WTDQDTGKMPLIR					Oxidation (M)[9]							Mascot
		2045.14		2044.99	-0.151	-74	84	103	IVQQEGVAALFSGVSATV												Mascot
									LR
		2352.14		2352.07	-0.071	-30	260	282	VMNMKVEAGAAPPYSGA					Oxidation (M)[2]							Mascot
									LDCALK
		2569.33		2569.22	-0.1055	-41	196	219	GSSLTVNRAMLVTASQL					Oxidation (M)[10]							Mascot
									ASYDQIK
		2995.62		2995.35	-0.2734	-91	84	111	IVQQEGVAALFSGVSATV												Mascot
									LRQTLYSTTR
		3175.65		3175.54	-0.1033	-33	226	257	GLMKDGLGTHVTASFAA					Oxidation (M)[3]							Mascot
									GFVASVASNPVDVIK
	8	hypothetical protein Csa_3G164550 [Cucumis sativus]										KGN57136.1		45851.7	9.15		10	32	0
		Protein Group
		PREDICTED: exopolygalacturonase-like [Cucumis										XP_004134494.1		45851.7		9.1499
Project 1\Sample project20170120\R17064-5												XP_004134494.1								23	of	96
		sativus]														996185
																3027
		Peptide Information
		Calc. Mass		Obsrv. Mass	± da	± ppm	Start	End	Sequence			Ion	C. I. %	Modification						Rank	Result Type
							Seq.	Seq.				Score
		1285.68		1285.67	-0.0075	-6	342	352	TNCQRPPSRVK												Mascot
		1285.68		1285.67	-0.0075	-6	342	352	TNCQRPPSRVK												Mascot
		1351.67		1351.8	0.1332	99	400	411	ELPFSAKCSNAK					Carbamidomethyl (C)[8]							Mascot
		1566.75		1566.77	0.0235	15	329	341	NPILIDQEYSCSK					Carbamidomethyl (C)[11]							Mascot
		1569.69		1569.73	0.0402	26	196	208	GFHMFVTNCENVR					Oxidation (M)[4]							Mascot
		2057.91		2057.99	0.0806	39	65	82	TDNSESFMKTWVAACHS					Oxidation (M)[8]							Mascot
									K
		2119		2118.97	-0.032	-15	121	138	GGVDISNYFSDEWILFEK												Mascot
		2557.05		2557.16	0.1038	41	148	171	GALDGQGSAVWEYNDC												Mascot
									GMNPNCQK
		2587.29		2587.1	-0.1853	-72	305	328	TWPDSPPSAASGILFQDI												Mascot
									NMVNVK
		2663.27		2663.28	0.0127	5	329	350	NPILIDQEYSCSKTNCQR					Carbamidomethyl (C)[11,16]							Mascot
									PPSR
		2748.32		2748.3	-0.0161	-6	49	73	ETVFNVLSFGAKPDGKT												Mascot
									DNSESFMK
	9	hypothetical protein Csa_2G073010 [Cucumis sativus]										KGN61238.1		37908.2	5.92		8	30	0
		Protein Group
		PREDICTED: 2-alkenal reductase										XP_004152839.1		37908.2		5.92
		(NADP(+)-dependent) [Cucumis sativus]														762
																9395
		Peptide Information
		Calc. Mass		Obsrv. Mass	± da	± ppm	Start	End	Sequence			Ion	C. I. %	Modification						Rank	Result Type
							Seq.	Seq.				Score
		836.382		836.311	-0.0711	-85	1	7	MAEVENK					Oxidation (M)[1]							Mascot
		1435.76		1435.74	-0.0164	-11	1	12	MAEVENKQVIFK												Mascot
		1949.04		1948.95	-0.0846	-43	13	30	GYIDGVPQLGDFELKIGK												Mascot
		2081.06		2080.97	-0.0947	-46	277	293	VNMKGFLQSDYLHLFPR					Oxidation (M)[3]							Mascot
		2106.05		2105.96	-0.0872	-41	315	335	EGLENAPAAFVGLFSGD												Mascot
									NLGK
		2295.23		2295.07	-0.1597	-70	153	175	KSDYVFVSAASGAVGQL												Mascot
									VGQLAK
		2981.33		2981.35	0.021	7	219	244	YFPNGIDIYFDNVGGDML					Carbamidomethyl (C)[23]							Mascot
									DAALCNMR
		2981.33		2981.35	0.021	7	219	244	YFPNGIDIYFDNVGGDML					Carbamidomethyl (C)[23]							Mascot
									DAALCNMR
		3013.32		3013.34	0.0202	7	219	244	YFPNGIDIYFDNVGGDML					Carbamidomethyl (C)[23], Oxidation							Mascot
									DAALCNMR					(M)[17,25]
		3137.43		3137.43	0.003	1	218	244	RYFPNGIDIYFDNVGGDM					Carbamidomethyl (C)[24]							Mascot
									LDAALCNMR
		3137.43		3137.43	0.003	1	218	244	RYFPNGIDIYFDNVGGDM					Carbamidomethyl (C)[24]							Mascot
Project 1\Sample project20170120\R17064-5				3137.43																24	Mascot	of	96
									LDAALCNMR
	10	hypothetical protein Csa_6G507370 [Cucumis sativus]										KGN48964.1		20200.3	9.13		6	30	0
		Protein Group
		PREDICTED: thiosulfate sulfurtransferase 16,										XP_004134838.1		20200.3		9.13
		chloroplastic [Cucumis sativus]														1144
																4092
		Peptide Information
		Calc. Mass		Obsrv. Mass	± da	± ppm	Start	End	Sequence			Ion	C. I. %	Modification						Rank	Result Type
							Seq.	Seq.				Score
		807.37		807.326	-0.0441	-55	178	184	NGLPMEF												Mascot
		1400.8		1400.69	-0.1108	-79	32	43	LLPMITGSLQRR					Oxidation (M)[4]							Mascot
		1576.83		1576.77	-0.0574	-36	123	135	NPHFLAEVAIYFR												Mascot
		1704.92		1704.8	-0.1192	-70	123	136	NPHFLAEVAIYFRK												Mascot
		2981.4		2981.35	-0.051	-17	150	177	SLMAAADLLASGYNYVT					Oxidation (M)[3]							Mascot
									DIAGGYEAWSR
		2981.4		2981.35	-0.051	-17	150	177	SLMAAADLLASGYNYVT					Oxidation (M)[3]							Mascot
									DIAGGYEAWSR
		3137.5		3137.43	-0.0691	-22	149	177	RSLMAAADLLASGYNYV					Oxidation (M)[4]							Mascot
									TDIAGGYEAWSR
		3137.5		3137.43	-0.0691	-22	149	177	RSLMAAADLLASGYNYV					Oxidation (M)[4]							Mascot
									TDIAGGYEAWSR
Project 1\Sample project20170120\R17064-5																				25	of	96
Gel Idx/Pos			302/M4						Instr./Gel Origin		BA2151/Sample Project 20170120					Process Status			Analysis Succeeded
Plate [#] Name			[1] Sample Project 20170120						Instrument Sample Name							Spectra			11
Rank		Protein Name						Species				Accession No.		Protein MW		Protein	Pep.	Protein	Protein		Total Ion	Total Ion
																PI	Count	Score	Score		Score	C. I. %
																			C. I. %
	1	hypothetical protein Csa_7G396430 [Cucumis sativus]										KGN44928.1		22556.6	4.45		9	201	100		159	100
		Protein Group
		PREDICTED: uncharacterized protein OsI_027940										XP_004136034.1		22556.6		4.4499
		[Cucumis sativus]														998092
																6514
		Peptide Information
		Calc. Mass		Obsrv. Mass	± da	± ppm	Start	End	Sequence			Ion	C. I. %	Modification						Rank	Result Type
							Seq.	Seq.				Score
		849.395		849.347	-0.0482	-57	193	201	GGVGSSEEK												Mascot
		1009.54		1009.53	-0.0098	-10	74	81	SIFCILEK					Carbamidomethyl (C)[4]							Mascot
		1009.54		1009.53	-0.0098	-10	74	81	SIFCILEK					Carbamidomethyl (C)[4]							Mascot
		1097.57		1097.57	-0.0082	-7	93	102	GDGKPPHYVK												Mascot
		1231.62		1231.6	-0.0147	-12	181	192	SGESAKPEGEIK												Mascot
		1246.7		1246.69	-0.0174	-14	16	26	VFITVQLPDSK												Mascot
		1246.7		1246.69	-0.0174	-14	16	26	VFITVQLPDSK			16	0								Mascot
		1479.84		1479.78	-0.0603	-41	90	102	LLRGDGKPPHYVK												Mascot
		1549.81		1549.79	-0.0237	-15	55	67	LELFDKVNVEESK												Mascot
		2657.12		2657.07	-0.0488	-18	108	132	WVDEDEDDGTAGLGDLD												Mascot
									LGGMDFSK
		2673.11		2673.04	-0.073	-27	108	132	WVDEDEDDGTAGLGDLD					Oxidation (M)[21]							Mascot
									LGGMDFSK
		2734.27		2734.25	-0.0259	-9	30	54	VNLEPDGVFTFSGSAGS												Mascot
									ENHHYELK
		2734.27		2734.25	-0.0259	-9	30	54	VNLEPDGVFTFSGSAGS			144	100								Mascot
									ENHHYELK
	2	hypothetical protein Csa_3G807310 [Cucumis sativus]										KGN59301.1		15467.5	11.1		8	44	0
		Protein Group
		PREDICTED: uncharacterized protein LOC101222384										XP_004136571.1		15467.5		11.1
		[Cucumis sativus]														381
																4697
		Peptide Information
		Calc. Mass		Obsrv. Mass	± da	± ppm	Start	End	Sequence			Ion	C. I. %	Modification						Rank	Result Type
							Seq.	Seq.				Score
		815.499		815.512	0.0135	17	131	137	RLISDIV												Mascot
		927.541		927.489	-0.0523	-56	67	74	WLISPVGR												Mascot
		947.516		947.587	0.0718	76	15	22	SSDELLRK												Mascot
Project 1\Sample project20170120\R17064-5				947.587																26	Mascot	of	96
		1152.53		1152.55	0.0179	16	23	34	FAEVGSESGGGR												Mascot
		1284.71		1284.6	-0.1112	-87	82	93	VGIGNGRSQQLR												Mascot
		1439.71		1439.8	0.0969	67	1	13	MDSSIGNVQHVPR												Mascot
		1567.8		1567.73	-0.066	-42	1	14	MDSSIGNVQHVPRK												Mascot
		2224.99		2225.08	0.0903	41	46	65	RVNNEEYCDSPSGTGGV					Carbamidomethyl (C)[8]							Mascot
									VER
	3	hypothetical protein Csa_7G290490 [Cucumis sativus]										KGN44426.1		10251.5	11.33		6	35	0
		Peptide Information
		Calc. Mass		Obsrv. Mass	± da	± ppm	Start	End	Sequence			Ion	C. I. %	Modification						Rank	Result Type
							Seq.	Seq.				Score
		836.357		836.298	-0.0583	-70	1	7	MQSSDPR					Oxidation (M)[1]							Mascot
		870.541		870.539	-0.0013	-1	8	14	ILELNLR												Mascot
		932.506		932.458	-0.0485	-52	55	61	THRYSLR												Mascot
		949.525		949.491	-0.0343	-36	48	54	RWFVVDK												Mascot
		1187.63		1187.62	-0.0102	-9	49	57	WFVVDKTHR												Mascot
		2756.47		2756.24	-0.23	-83	24	46	AADHRLRPPVFVYHTCAL					Carbamidomethyl (C)[16]							Mascot
									LLNHR
	4	hypothetical protein Csa_2G004770 [Cucumis sativus]										KGN60628.1		10216.2	9.21		5	34	0
		Peptide Information
		Calc. Mass		Obsrv. Mass	± da	± ppm	Start	End	Sequence			Ion	C. I. %	Modification						Rank	Result Type
							Seq.	Seq.				Score
		1011.5		1011.52	0.0244	24	69	77	LDSETGYVK												Mascot
		1146.53		1146.54	0.0119	10	83	92	FPWAYGFSAT												Mascot
		1268.65		1268.67	0.0261	21	69	79	LDSETGYVKTR												Mascot
		2662.4		2662.19	-0.2095	-79	1	24	MLPAPVQLNLQNSLGNF					Oxidation (M)[1]							Mascot
									VEHLPSK
		2749.47		2749.26	-0.2056	-75	31	55	LRSPVPAPVYDHFITIGQ												Mascot
									PDIQTGK
	5	PREDICTED: inactive poly [ADP-ribose] polymerase										XP_004136202.1		65844.9	6.67		12	33	0
		RCD1 [Cucumis sativus]
		Protein Group
		PREDICTED: inactive poly [ADP-ribose] polymerase										XP_011652635.1		65844.9		6.67
		RCD1 [Cucumis sativus]														762
																9395
		Peptide Information
		Calc. Mass		Obsrv. Mass	± da	± ppm	Start	End	Sequence			Ion	C. I. %	Modification						Rank	Result Type
							Seq.	Seq.				Score
		850.434		850.431	-0.0025	-3	317	323	QIETTMK												Mascot
Project 1\Sample project20170120\R17064-5																				27	of	96
		991.482		991.568	0.0862	87	502	509	SPWMAFPR												Mascot
		1009.51		1009.53	0.0227	22	538	545	TSRDEFVR												Mascot
		1009.51		1009.53	0.0227	22	538	545	TSRDEFVR												Mascot
		1119.53		1119.53	0.0085	8	302	310	WSSPLMQDR												Mascot
		1187.66		1187.62	-0.0425	-36	78	87	NFIRSGLPQR												Mascot
		1429.75		1429.72	-0.0322	-23	558	570	STLMSLQCKPPPK												Mascot
		1567.67		1567.73	0.0657	42	229	242	TCDIVGDWEGSETR												Mascot
		1823.82		1823.88	0.0563	31	227	242	AKTCDIVGDWEGSETR					Carbamidomethyl (C)[4]							Mascot
		2106.04		2105.95	-0.0891	-42	558	576	STLMSLQCKPPPKSPCT					Carbamidomethyl (C)[8], Oxidation (M)[4]							Mascot
									SK
		2662.23		2662.19	-0.0376	-14	259	281	EIDCYSTPQNEVIHSIVNS					Carbamidomethyl (C)[4]							Mascot
									DDVK
		2717.42		2717.25	-0.1697	-62	340	365	DILSGRMPYGGVGHSGL												Mascot
									KPTSLYGVR
		2721.2		2721.23	0.0341	13	460	483	QDQLQINCSSIESEEDCV					Carbamidomethyl (C)[8,17]							Mascot
									SSPAPK
	6	hypothetical protein Csa_1G145940 [Cucumis sativus]										KGN64892.1		115399	7.04		17	32	0
		Protein Group
		PREDICTED: putative SWI/SNF-related										XP_004139464.1		115399		7.0399
		matrix-associated actin-dependent regulator of														999618
		chromatin subfamily A member 3-like 2 isoform X2														5303
		[Cucumis sativus]
		Peptide Information
		Calc. Mass		Obsrv. Mass	± da	± ppm	Start	End	Sequence			Ion	C. I. %	Modification						Rank	Result Type
							Seq.	Seq.				Score
		849.41		849.347	-0.0635	-75	869	875	NWVESSK												Mascot
		859.463		859.538	0.0746	87	454	462	GGVSNGQLK												Mascot
		870.523		870.539	0.0165	19	206	212	CLLPLVR					Carbamidomethyl (C)[1]							Mascot
		892.477		892.46	-0.0176	-20	862	868	FQIDIEK												Mascot
		932.498		932.458	-0.0407	-44	1007	1014	MEAVQARK												Mascot
		1031.59		1031.51	-0.0741	-72	166	175	TPSPAKVFGK												Mascot
		1119.58		1119.53	-0.049	-44	304	314	VSCSLPSSLAR												Mascot
		1439.79		1439.8	0.0177	12	581	593	VVLDEAHNIKSSK												Mascot
		1461.81		1461.71	-0.1037	-71	304	317	VSCSLPSSLARTLK												Mascot
		1503.79		1503.75	-0.0373	-25	769	782	FLKGTPNTQVGEGR												Mascot
		1549.67		1549.79	0.1162	75	742	753	QCCDHPFLVMSR					Carbamidomethyl (C)[2,3]							Mascot
		1571.89		1571.76	-0.1259	-80	594	608	SQISIAATALVADRR												Mascot
		1614.78		1614.72	-0.063	-39	15	28	SIVGPDFSYMDVIR					Oxidation (M)[10]							Mascot
		1823.95		1823.88	-0.0667	-37	935	950	EFSEDNGILVLLMSLK					Oxidation (M)[13]							Mascot
		2749.45		2749.26	-0.1878	-68	609	631	WCLTGTPIQNNLEDIFSLL												Mascot
									RFLR
Project 1\Sample project20170120\R17064-5																				28	of	96
		2800.21		2800.18	-0.0371	-13	742	764	QCCDHPFLVMSRGDTQE					Carbamidomethyl (C)[2,3]							Mascot
									YSDLNK
		3175.39		3175.57	0.1831	58	799	826	SGEHGECPICLEVFEDAV					Carbamidomethyl (C)[7], Oxidation (M)[26]							Mascot
									LTPCAHRMCR
	7	hypothetical protein Csa_1G059200 [Cucumis sativus]										KGN64489.1		42068.2	9.31		5	30	0		19	33.485
		Protein Group
		PREDICTED: putative pectate lyase 2 [Cucumis										XP_004153041.1		42068.2		9.31
		sativus]														4196
																167
		Peptide Information
		Calc. Mass		Obsrv. Mass	± da	± ppm	Start	End	Sequence			Ion	C. I. %	Modification						Rank	Result Type
							Seq.	Seq.				Score
		856.452		856.525	0.0724	85	168	175	DTVSHIGK												Mascot
		1097.53		1097.57	0.036	33	115	123	NELMVNSFK					Oxidation (M)[4]							Mascot
		1246.67		1246.69	0.0143	11	253	263	FGAGLIERMPR												Mascot
		1246.67		1246.69	0.0143	11	253	263	FGAGLIERMPR			19	33.485								Mascot
		1639.81		1639.87	0.0568	35	115	128	NELMVNSFKTIDGR					Oxidation (M)[4]							Mascot
		2284.18		2284.12	-0.0605	-26	352	374	AQSFPVAPGSMVPALTA					Oxidation (M)[11]							Mascot
									NSGPLR
	8	hypothetical protein Csa_3G603580 [Cucumis sativus]										KGN58271.1		242917	6.12		27	30	0
		Protein Group
		PREDICTED: glutamate synthase [NADH], amyloplastic										XP_011651598.1		242917		6.1199
		isoform X1 [Cucumis sativus]														998855
																5908
		Peptide Information
		Calc. Mass		Obsrv. Mass	± da	± ppm	Start	End	Sequence			Ion	C. I. %	Modification						Rank	Result Type
							Seq.	Seq.				Score
		805.46		805.421	-0.0393	-49	267	273	LSMVAIR					Oxidation (M)[3]							Mascot
		815.503		815.512	0.0094	12	1466	1472	IVVYPPK												Mascot
		818.389		818.396	0.0068	8	1638	1645	EASEPSAK												Mascot
		850.42		850.431	0.0114	13	40	47	AARCSASK					Carbamidomethyl (C)[4]							Mascot
		892.416		892.46	0.0439	49	827	834	SSGEFHTK												Mascot
		932.468		932.458	-0.0108	-12	720	727	GLEETLDR												Mascot
		1009.57		1009.53	-0.0388	-38	2055	2062	TYEVLTKR												Mascot
		1009.57		1009.53	-0.0388	-38	2055	2062	TYEVLTKR												Mascot
		1119.56		1119.53	-0.0305	-27	223	233	SVQTDNTGLGK												Mascot
		1163.67		1163.62	-0.048	-41	705	714	SKVLDITYPK												Mascot
		1268.66		1268.67	0.0108	9	1699	1709	GFIAYEREGVK												Mascot
Project 1\Sample project20170120\R17064-5																				29	of	96
		1305.65		1305.64	-0.0057	-4	2024	2034	APGNPWPQWPR												Mascot
		1344.66		1344.65	-0.0185	-14	844	855	ASNYGMMKVLAK					Oxidation (M)[6,7]							Mascot
		1479.76		1479.78	0.0203	14	937	950	GGEIHLNDPVVMAK												Mascot
		1503.69		1503.75	0.0611	41	1048	1060	MEPLPDGSMNPKR					Oxidation (M)[1,9]							Mascot
		1537.76		1537.72	-0.0486	-32	1780	1792	LLETNNFPEFTGR												Mascot
		1545.7		1545.72	0.0178	12	2140	2154	FSTTVDGVFAAGDCR												Mascot
		1596.82		1596.74	-0.0799	-50	1415	1428	YHMAGLPSETIHIK												Mascot
		1617.93		1617.78	-0.1517	-94	2010	2023	IVNLELLPQPPQTR												Mascot
		1940.91		1940.88	-0.024	-12	330	345	FSTNTFPSWDRAQPMR												Mascot
		2105.97		2105.95	-0.0203	-10	412	429	SLPEAVMMMIPEAWQND					Oxidation (M)[7]							Mascot
									K
		2149.99		2150.03	0.0441	21	608	628	DGVEALGSMGNDTPLAV					Oxidation (M)[9]							Mascot
									MSNR
		2247.05		2247.09	0.032	14	1540	1561	TGRNFAAGMSGGIAYVL					Oxidation (M)[9]							Mascot
									DMDGK
		2657.25		2657.07	-0.1819	-68	1282	1303	EKFAGEPEHVINFFFMVA												Mascot
									EEMR
		2673.25		2673.04	-0.2061	-77	1282	1303	EKFAGEPEHVINFFFMVA					Oxidation (M)[16]							Mascot
									EEMR
		2716.27		2716.26	-0.009	-3	175	199	DNGFELPPAGQYAVGMF												Mascot
									FLPTSDSR
		2716.27		2716.26	-0.009	-3	175	199	DNGFELPPAGQYAVGMF												Mascot
									FLPTSDSR
		2721.33		2721.23	-0.1016	-37	1516	1542	AVVEGVGDHGCEYMTG					Oxidation (M)[14]							Mascot
									GTVVILGKTGR
		2800.14		2800.18	0.0388	14	1735	1760	TQSARCMDCGTPFCHQE					Oxidation (M)[7]							Mascot
									NSGCPLGNK
		3175.6		3175.57	-0.0249	-8	2093	2122	EVEGSEEIIEADLVLLAMG												Mascot
									FLGPESTVAEK
	9	hypothetical protein Csa_6G524630 [Cucumis sativus]										KGN49425.1		96898.9	8.32		18	30	0
		Protein Group
		PREDICTED: pentatricopeptide repeat-containing										XP_011658305.1		96898.9		8.3199
		protein At1g09900 [Cucumis sativus]														996948
																2422
		Peptide Information
		Calc. Mass		Obsrv. Mass	± da	± ppm	Start	End	Sequence			Ion	C. I. %	Modification						Rank	Result Type
							Seq.	Seq.				Score
		815.462		815.512	0.0499	61	615	621	EANQLLK												Mascot
		918.555		918.5	-0.0554	-60	268	274	ILRLMTR					Oxidation (M)[5]							Mascot
		1119.5		1119.53	0.0341	30	513	520	KMMQQMYK					Oxidation (M)[2,3]							Mascot
		1216.67		1216.55	-0.1152	-95	696	706	QGLVPSPVTYR												Mascot
		1268.66		1268.67	0.0188	15	476	486	AKELVSEMFSK												Mascot
		1284.65		1284.6	-0.0485	-38	476	486	AKELVSEMFSK					Oxidation (M)[8]							Mascot
		1439.7		1439.8	0.1043	72	458	469	VEYSAIVHAYCK					Carbamidomethyl (C)[11]							Mascot
Project 1\Sample project20170120\R17064-5																				30	of	96
		1461.72		1461.71	-0.0172	-12	387	398	VSYYTVMGLLCR					Carbamidomethyl (C)[11]							Mascot
		1596.8		1596.74	-0.0567	-36	683	695	IEEATELTMKMLR					Oxidation (M)[9,11]							Mascot
		1962.95		1962.9	-0.0403	-21	277	293	IQLCPEAFGFVMVSYSR					Oxidation (M)[12]							Mascot
		2105.98		2105.95	-0.0315	-15	381	398	GCSPDKVSYYTVMGLLC					Carbamidomethyl (C)[2,17]							Mascot
									R
		2154.13		2154.03	-0.0967	-45	745	763	LCKFGYLEEANSLLGEVL												Mascot
									R
		2225.16		2225.08	-0.0769	-35	748	767	FGYLEEANSLLGEVLRTA												Mascot
									SR
		2247.11		2247.09	-0.0198	-9	277	296	IQLCPEAFGFVMVSYSRA					Oxidation (M)[12]							Mascot
									GR
		2313.11		2313.09	-0.0135	-6	772	791	TCHVLMESYLNVGIPMSA					Carbamidomethyl (C)[2]							Mascot
									YK
		2662.36		2662.19	-0.1653	-62	412	434	MQTDSKLLPDHVTYNSLI												Mascot
									QMLSK
		2678.35		2678.19	-0.1631	-61	412	434	MQTDSKLLPDHVTYNSLI					Oxidation (M)[1]							Mascot
									QMLSK
		2717.29		2717.25	-0.0422	-16	772	795	TCHVLMESYLNVGIPMSA					Oxidation (M)[6,16]							Mascot
									YKVACR
		2721.44		2721.23	-0.2107	-77	310	334	AGVEPNLSICNTAIHILVM					Carbamidomethyl (C)[10]							Mascot
									GNELKK
		2756.28		2756.24	-0.0398	-14	622	645	ECMNKGCAVNVVNFTTVI					Carbamidomethyl (C)[2,7]							Mascot
									HGFCQK
	10	PREDICTED: SWI/SNF complex component SNF12										XP_011651559.1		60536.5	9.48		11	29	0
		homolog [Cucumis sativus]
		Protein Group
		PREDICTED: SWI/SNF complex component SNF12										XP_004145668.1		60536.5		9.4799
		homolog [Cucumis sativus]														995422
																3633
		PREDICTED: SWI/SNF complex component SNF12										XP_011651560.1		60536.5		9.4799
		homolog [Cucumis sativus]														995422
																3633
		hypothetical protein Csa_3G585900 [Cucumis sativus]										KGN58179.1		60536.5		9.4799
																995422
																3633
		Peptide Information
		Calc. Mass		Obsrv. Mass	± da	± ppm	Start	End	Sequence			Ion	C. I. %	Modification						Rank	Result Type
							Seq.	Seq.				Score
		818.441		818.396	-0.0448	-55	264	270	SNPLYPK												Mascot
		918.483		918.5	0.0167	18	271	277	FSSFFKR												Mascot
		1031.46		1031.51	0.0569	55	2	10	SMNNNNPPK					Oxidation (M)[2]							Mascot
		1146.5		1146.54	0.0343	30	1	10	MSMNNNNPPK												Mascot
		1152.56		1152.55	-0.0145	-13	323	331	LEMNYIPEK					Oxidation (M)[3]							Mascot
		1158.64		1158.61	-0.0255	-22	440	450	ELSALLANAEK												Mascot
		1427.72		1427.82	0.0962	67	323	333	LEMNYIPEKFK					Oxidation (M)[3]							Mascot
Project 1\Sample project20170120\R17064-5																				31	of	96
		2154.01		2154.03	0.0225	10	365	382	LQNPNDPSFFHCDPPLQ					Carbamidomethyl (C)[12]							Mascot
									K
		2225.08		2225.08	-0.0017	-1	364	382	KLQNPNDPSFFHCDPPL												Mascot
									QK
		2239.22		2239.09	-0.1289	-58	213	231	TLRIYVFNTFANQVNTIPK												Mascot
		2716.4		2716.26	-0.136	-50	475	498	RAFFLGFSQSPVEFIDALI												Mascot
									ESQSK
		2716.4		2716.26	-0.136	-50	475	498	RAFFLGFSQSPVEFIDALI												Mascot
									ESQSK
Project 1\Sample project20170120\R17064-5																				32	of	96
Gel Idx/Pos			303/M5						Instr./Gel Origin		BA2151/Sample Project 20170120					Process Status			Analysis Succeeded
Plate [#] Name			[1] Sample Project 20170120						Instrument Sample Name							Spectra			11
Rank		Protein Name						Species				Accession No.		Protein MW		Protein	Pep.	Protein	Protein		Total Ion	Total Ion
																PI	Count	Score	Score		Score	C. I. %
																			C. I. %
	1	hypothetical protein Csa_7G452090 [Cucumis sativus]										KGN45554.1		54147.2	7.68		2	44	0		43	99.778
		Protein Group
		PREDICTED: 11S globulin subunit beta-like [Cucumis										XP_004141669.2		54147.2		7.6799
		sativus]														998283
																3862
		Peptide Information
		Calc. Mass		Obsrv. Mass	± da	± ppm	Start	End	Sequence			Ion	C. I. %	Modification						Rank	Result Type
							Seq.	Seq.				Score
		1537.76		1537.69	-0.0724	-47	458	470	YGQPEMRIFSPGR												Mascot
		2700.32		2700.3	-0.0193	-7	225	249	SGNVFSGFADEFLEEAL												Mascot
									QIDSGLVR
		2700.32		2700.3	-0.0193	-7	225	249	SGNVFSGFADEFLEEAL			43	99.778								Mascot
									QIDSGLVR
	2	hypothetical protein Csa_5G528950 [Cucumis sativus]										KGN51410.1		8000.2	7.98		5	36	0
		Peptide Information
		Calc. Mass		Obsrv. Mass	± da	± ppm	Start	End	Sequence			Ion	C. I. %	Modification						Rank	Result Type
							Seq.	Seq.				Score
		1324.62		1324.67	0.0555	42	1	13	MGGGGCIGMVVVR					Carbamidomethyl (C)[6], Oxidation (M)[1,9]							Mascot
		1362.58		1362.63	0.0491	36	29	41	VDAESNEGDAEAR												Mascot
		1963.02		1962.9	-0.122	-62	51	67	HGMLPPFISPPEELSRR												Mascot
		2247.07		2247.08	0.0049	2	29	50	VDAESNEGDAEARSGVT												Mascot
									ELIGK
		2691.42		2691.25	-0.1636	-61	42	66	SGVTELIGKHGMLPPFIS												Mascot
									PPEELSR
	3	hypothetical protein Csa_7G433160 [Cucumis sativus]										KGN45285.1		11290.9	9.51		4	25	0
		Peptide Information
		Calc. Mass		Obsrv. Mass	± da	± ppm	Start	End	Sequence			Ion	C. I. %	Modification						Rank	Result Type
							Seq.	Seq.				Score
		1427.75		1427.79	0.0459	32	22	36	NSELPAVSAAGGINK												Mascot
		1940.95		1940.87	-0.0748	-39	37	54	LQPPPCPSSPLRFCGGE												Mascot
									R
		1940.95		1940.87	-0.0748	-39	37	54	LQPPPCPSSPLRFCGGE												Mascot
									R
		2284.15		2284.08	-0.0666	-29	60	79	TVTVTEDVNESAEAFIQK												Mascot
									FR
Project 1\Sample project20170120\R17064-5																				33	of	96
		2700.41		2700.3	-0.1179	-44	22	48	NSELPAVSAAGGINKLQP												Mascot
									PPCPSSPLR
		2700.41		2700.3	-0.1179	-44	22	48	NSELPAVSAAGGINKLQP												Mascot
									PPCPSSPLR
	4	hypothetical protein Csa_1G181450 [Cucumis sativus]										KGN65032.1		13724.5	5.15		2	25	0		17	12.371
		Peptide Information
		Calc. Mass		Obsrv. Mass	± da	± ppm	Start	End	Sequence			Ion	C. I. %	Modification						Rank	Result Type
							Seq.	Seq.				Score
		1265.57		1265.62	0.0501	40	57	67	GGADCRNIQMK					Carbamidomethyl (C)[5], Oxidation (M)[10]							Mascot
		1479.65		1479.79	0.1383	93	49	62	ALDWACGKGGADCR					Carbamidomethyl (C)[6]							Mascot
		1479.65		1479.79	0.1383	93	49	62	ALDWACGKGGADCR			17	12.371	Carbamidomethyl (C)[6]							Mascot
	5	PREDICTED: PLASMODESMATA CALLOSE-BINDING										XP_011654946.1		14239.8	5.71		2	25	0		17	12.371
		PROTEIN 5-like [Cucumis sativus]
		Peptide Information
		Calc. Mass		Obsrv. Mass	± da	± ppm	Start	End	Sequence			Ion	C. I. %	Modification						Rank	Result Type
							Seq.	Seq.				Score
		1265.57		1265.62	0.0501	40	61	71	GGADCRNIQMK					Carbamidomethyl (C)[5], Oxidation (M)[10]							Mascot
		1479.65		1479.79	0.1383	93	53	66	ALDWACGKGGADCR					Carbamidomethyl (C)[6]							Mascot
		1479.65		1479.79	0.1383	93	53	66	ALDWACGKGGADCR			17	12.371	Carbamidomethyl (C)[6]							Mascot
	6	hypothetical protein Csa_7G429520 [Cucumis sativus]										KGN45166.1		36134.7	5.69		7	25	0
		Protein Group
		PREDICTED: homeobox-leucine zipper protein										XP_004135907.1		36134.7		5.69
		HOX11-like [Cucumis sativus]														572
																2046
		Peptide Information
		Calc. Mass		Obsrv. Mass	± da	± ppm	Start	End	Sequence			Ion	C. I. %	Modification						Rank	Result Type
							Seq.	Seq.				Score
		1324.54		1324.67	0.1291	97	156	167	ASDEDENGCTRK												Mascot
		1479.76		1479.79	0.0225	15	33	45	KDLGFCVDLSIGR					Carbamidomethyl (C)[6]							Mascot
		1479.76		1479.79	0.0225	15	33	45	KDLGFCVDLSIGR					Carbamidomethyl (C)[6]							Mascot
		1823.75		1823.89	0.1382	76	136	151	DQMENGVMNEVGESER												Mascot
		2083.13		2082.95	-0.1858	-89	200	215	QLNLRPRQVEVWFQNR												Mascot
		2224.96		2225.08	0.1206	54	136	155	DQMENGVMNEVGESER												Mascot
									ASSR
		2723.24		2723.28	0.0446	16	108	134	TASPNSAASSFQMEFGL												Mascot
									YGSGGNISSR
		2807.37		2807.28	-0.093	-33	298	326	SGLAIGGGRPGSSSFPFS												Mascot
									AKTQSHQSTAS
	7	PREDICTED: uncharacterized protein LOC101207495										XP_004141636.1		39776.7	8.95		8	22	0
Project 1\Sample project20170120\R17064-5																				34	of	96
		[Cucumis sativus]
		Protein Group
		hypothetical protein Csa_5G650285 [Cucumis sativus]										KGN52675.1		40483.1		8.8299
																999237
																605
		Peptide Information
		Calc. Mass		Obsrv. Mass	± da	± ppm	Start	End	Sequence			Ion	C. I. %	Modification						Rank	Result Type
							Seq.	Seq.				Score
		1315.65		1315.69	0.0427	32	77	87	IILCHGLDSCK					Carbamidomethyl (C)[4,10]							Mascot
		1596.85		1596.76	-0.0949	-59	39	54	ICGSANGPPLTSPRVK												Mascot
		1794.81		1794.79	-0.023	-13	88	102	DMDVPVSQELMEELK					Oxidation (M)[2,11]							Mascot
		1940.99		1940.87	-0.1163	-60	225	242	VLGSEGMFLDSDLTILSK					Oxidation (M)[7]							Mascot
		1940.99		1940.87	-0.1163	-60	225	242	VLGSEGMFLDSDLTILSK					Oxidation (M)[7]							Mascot
		2006.97		2006.91	-0.0549	-27	71	87	EEAQYKIILCHGLDSCK					Carbamidomethyl (C)[10]							Mascot
		2065.93		2065.98	0.0434	21	272	287	WEFDPMELRNPFPDEK					Oxidation (M)[6]							Mascot
		2125		2125.03	0.0327	15	144	161	FYVIGCSMGTYPLWACL					Carbamidomethyl (C)[6], Oxidation (M)[8]							Mascot
									K
		2807.4		2807.28	-0.1192	-42	138	161	LEIGTKFYVIGCSMGTYP					Carbamidomethyl (C)[12,22]							Mascot
									LWACLK
	8	PREDICTED: uncharacterized protein LOC101204212										XP_011651226.1		62979.9	7.26		9	22	0
		isoform X2 [Cucumis sativus]
		Protein Group
		PREDICTED: uncharacterized protein LOC101204212										XP_004140726.1		62979.9		7.26
		isoform X2 [Cucumis sativus]														2288
																8184
		PREDICTED: uncharacterized protein LOC101204212										XP_011651227.1		62979.9		7.26
		isoform X2 [Cucumis sativus]														2288
																8184
		hypothetical protein Csa_3G198450 [Cucumis sativus]										KGN57481.1		62979.9		7.26
																2288
																8184
		Peptide Information
		Calc. Mass		Obsrv. Mass	± da	± ppm	Start	End	Sequence			Ion	C. I. %	Modification						Rank	Result Type
							Seq.	Seq.				Score
		1324.71		1324.67	-0.0421	-32	553	563	YLFLPEKSSLQ												Mascot
		1362.72		1362.63	-0.0979	-72	342	352	VNPIHLNRDER												Mascot
		1823.94		1823.89	-0.0478	-26	220	236	CMKNIFISLADSAVPSK												Mascot
		1904.84		1904.92	0.0873	46	180	196	SPVAEVNECSQPVECEK					Carbamidomethyl (C)[9]							Mascot
		2124.92		2125.03	0.1101	52	147	165	LMHSSPCSVSLCSNSEA					Carbamidomethyl (C)[7,12]							Mascot
Project 1\Sample project20170120\R17064-5				2125.03																35	Mascot	of	96
									MK
		2195.99		2196.06	0.073	33	147	166	LMHSSPCSVSLCSNSEA					Carbamidomethyl (C)[7]							Mascot
									MKK
		2195.99		2196.06	0.073	33	147	166	LMHSSPCSVSLCSNSEA					Carbamidomethyl (C)[7]							Mascot
									MKK
		2681.43		2681.25	-0.1822	-68	353	375	LAFWINLYNALIMHAYLAY												Mascot
									GVPK
		2700.22		2700.3	0.071	26	142	165	LAEYRLMHSSPCSVSLC					Carbamidomethyl (C)[12]							Mascot
									SNSEAMK
		2700.22		2700.3	0.071	26	142	165	LAEYRLMHSSPCSVSLC					Carbamidomethyl (C)[12]							Mascot
									SNSEAMK
		2723.39		2723.28	-0.105	-39	435	459	FAIDKHEPLLTFALSCGTY												Mascot
									SSPAVR
	9	PREDICTED: uncharacterized protein LOC101203865										XP_011653371.1		30849	7.96		6	21	0
		isoform X2 [Cucumis sativus]
		Peptide Information
		Calc. Mass		Obsrv. Mass	± da	± ppm	Start	End	Sequence			Ion	C. I. %	Modification						Rank	Result Type
							Seq.	Seq.				Score
		1357.64		1357.63	-0.0043	-3	266	276	LITHFVLHDCC					Carbamidomethyl (C)[10]							Mascot
		2225.21		2225.08	-0.1348	-61	134	154	CTGHPTKLPNVVAYAGV					Carbamidomethyl (C)[1]							Mascot
									SLLK
		2681.29		2681.25	-0.0391	-15	2	23	CFLLLMTLFETCIMSSCV					Carbamidomethyl (C)[1,12,17], Oxidation							Mascot
									KPAK					(M)[6,14]
		2691.36		2691.25	-0.1025	-38	2	24	CFLLLMTLFETCIMSSCV					Carbamidomethyl (C)[1]							Mascot
									KPAKR
		2723.32		2723.28	-0.0359	-13	1	23	MCFLLLMTLFETCIMSSC					Carbamidomethyl (C)[2,13]							Mascot
									VKPAK
		3175.55		3175.57	0.0237	7	175	200	NLEWTNVGRLHCLLPWW												Mascot
									EDTTVSFMK
	10	PREDICTED: uncharacterized protein LOC101204212										XP_011651224.1		63108	7.26		9	21	0
		isoform X1 [Cucumis sativus]
		Protein Group
		PREDICTED: uncharacterized protein LOC101204212										XP_011651223.1		63108		7.26
		isoform X1 [Cucumis sativus]														2288
																8184
		PREDICTED: uncharacterized protein LOC101204212										XP_011651225.1		63108		7.26
		isoform X1 [Cucumis sativus]														2288
																8184
		Peptide Information
		Calc. Mass		Obsrv. Mass	± da	± ppm	Start	End	Sequence			Ion	C. I. %	Modification						Rank	Result Type
							Seq.	Seq.				Score
		1324.71		1324.67	-0.0421	-32	554	564	YLFLPEKSSLQ												Mascot
		1362.72		1362.63	-0.0979	-72	343	353	VNPIHLNRDER												Mascot
		1823.94		1823.89	-0.0478	-26	221	237	CMKNIFISLADSAVPSK												Mascot
		1904.84		1904.92	0.0873	46	181	197	SPVAEVNECSQPVECEK					Carbamidomethyl (C)[9]							Mascot
		2124.92		2125.03	0.1101	52	148	166	LMHSSPCSVSLCSNSEA					Carbamidomethyl (C)[7,12]							Mascot
Project 1\Sample project20170120\R17064-5				2125.03																36	Mascot	of	96
									MK
		2195.99		2196.06	0.073	33	148	167	LMHSSPCSVSLCSNSEA					Carbamidomethyl (C)[7]							Mascot
									MKK
		2195.99		2196.06	0.073	33	148	167	LMHSSPCSVSLCSNSEA					Carbamidomethyl (C)[7]							Mascot
									MKK
		2681.43		2681.25	-0.1822	-68	354	376	LAFWINLYNALIMHAYLAY												Mascot
									GVPK
		2700.22		2700.3	0.071	26	143	166	LAEYRLMHSSPCSVSLC					Carbamidomethyl (C)[12]							Mascot
									SNSEAMK
		2700.22		2700.3	0.071	26	143	166	LAEYRLMHSSPCSVSLC					Carbamidomethyl (C)[12]							Mascot
									SNSEAMK
		2723.39		2723.28	-0.105	-39	436	460	FAIDKHEPLLTFALSCGTY												Mascot
									SSPAVR
Project 1\Sample project20170120\R17064-5																				37	of	96
Gel Idx/Pos			304/M6						Instr./Gel Origin		BA2151/Sample Project 20170120					Process Status			Analysis Succeeded
Plate [#] Name			[1] Sample Project 20170120						Instrument Sample Name							Spectra			11
Rank		Protein Name						Species				Accession No.		Protein MW		Protein	Pep.	Protein	Protein		Total Ion	Total Ion
																PI	Count	Score	Score		Score	C. I. %
																			C. I. %
	1	hypothetical protein Csa_3G824890 [Cucumis sativus]										KGN59544.1		36680	4.7		22	531	100		385	100
		Protein Group
		PREDICTED: uncharacterized protein At5g39570										XP_004136693.1		36680		4.6999
		[Cucumis sativus]														998092
																6514
		Peptide Information
		Calc. Mass		Obsrv. Mass	± da	± ppm	Start	End	Sequence			Ion	C. I. %	Modification						Rank	Result Type
							Seq.	Seq.				Score
		811.322		811.325	0.0034	4	318	323	RNYDDE												Mascot
		832.366		832.318	-0.0476	-57	1	6	MPYYSR					Oxidation (M)[1]							Mascot
		927.369		927.378	0.0085	9	265	271	SEEEDYR												Mascot
		1150.48		1150.48	0.0027	2	286	295	YGYGEEGYGR												Mascot
		1150.48		1150.48	0.0027	2	286	295	YGYGEEGYGR			28	84.972								Mascot
		1228.51		1228.51	0.0013	1	219	229	QSESEEYGSGR												Mascot
		1234.5		1234.5	0.0039	3	195	206	ESDSYGSGGYGR												Mascot
		1306.58		1306.58	0.0028	2	285	295	RYGYGEEGYGR												Mascot
		1338.55		1338.55	0.0002	0	233	244	YGEEGYEGSGYK												Mascot
		1339.59		1339.58	-0.0111	-8	208	218	QEEGESEGYRR												Mascot
		1362.59		1362.59	-0.0002	0	194	206	KESDSYGSGGYGR												Mascot
		1419.58		1419.58	0.002	1	180	193	QESDSYGSGGYGGR												Mascot
		1419.58		1419.58	0.002	1	180	193	QESDSYGSGGYGGR			17	0								Mascot
		1494.65		1494.67	0.0158	11	233	245	YGEEGYEGSGYKR												Mascot
		1594.7		1594.68	-0.0226	-14	231	244	QKYGEEGYEGSGYK												Mascot
		1612.69		1612.68	-0.0049	-3	246	258	EEYDRPSYGDEPR												Mascot
		1612.69		1612.68	-0.0049	-3	246	258	EEYDRPSYGDEPR			21	21.313								Mascot
		1687.76		1687.83	0.0752	45	265	277	SEEEDYRKPSYER												Mascot
		1687.76		1687.83	0.0752	45	265	277	SEEEDYRKPSYER												Mascot
		1768.79		1768.78	-0.0084	-5	245	258	REEYDRPSYGDEPR												Mascot
		1776.78		1776.78	-0.0018	-1	125	140	KPEYGEQEYGSGGYGR												Mascot
		1776.78		1776.78	-0.0018	-1	125	140	KPEYGEQEYGSGGYGR			62	99.995								Mascot
		1812.73		1812.73	-0.0018	-1	142	158	QESESYGSGEYGSGGY												Mascot
									R
Project 1\Sample project20170120\R17064-5																				38	of	96
		1932.88		1932.88	-0.0084	-4	124	140	RKPEYGEQEYGSGGYG												Mascot
									R
		1940.83		1940.82	-0.0043	-2	141	158	KQESESYGSGEYGSGGY												Mascot
									R
		1940.83		1940.82	-0.0043	-2	141	158	KQESESYGSGEYGSGGY			86	100								Mascot
									R
		1997.81		1997.81	-0.002	-1	161	179	QESESYGSQEYGSGGY												Mascot
									GGR
		2125.91		2125.9	-0.0061	-3	160	179	KQESESYGSQEYGSGGY												Mascot
									GGR
		2125.91		2125.9	-0.0061	-3	160	179	KQESESYGSQEYGSGGY			170	100								Mascot
									GGR
	2	hypothetical protein Csa_1G439830 [Cucumis sativus]										KGN65541.1		37884.5	6.52		10	42	0
		Protein Group
		GA 2-oxidase [Cucumis sativus]										CCD28487.1		37884.5		6.5199
																999809
																2651
		gibberellin 2-beta-dioxygenase-like [Cucumis sativus]										NP_001269061.1		37884.5		6.5199
																999809
																2651
		Peptide Information
		Calc. Mass		Obsrv. Mass	± da	± ppm	Start	End	Sequence			Ion	C. I. %	Modification						Rank	Result Type
							Seq.	Seq.				Score
		1132.58		1132.47	-0.104	-92	73	81	FFHLPQSEK												Mascot
		1795.88		1795.72	-0.163	-91	181	196	LNHYPPCPELEALSGR												Mascot
		1858.99		1858.96	-0.0278	-15	1	16	MVVQSQLVFDHFAPIK												Mascot
		1874.98		1874.93	-0.0531	-28	1	16	MVVQSQLVFDHFAPIK					Oxidation (M)[1]							Mascot
		1915.05		1914.87	-0.1786	-93	286	302	IAPLPSLLEEGEKSLYR												Mascot
		2009.08		2008.93	-0.1477	-74	197	214	NLIGFGEHTDPQIISVLR												Mascot
		2108.04		2107.91	-0.1379	-65	146	163	EMACQVLELMAEGLKIEK					Carbamidomethyl (C)[4], Oxidation (M)[2]							Mascot
		2177.12		2176.95	-0.1748	-80	1	19	MVVQSQLVFDHFAPIKSC												Mascot
									K
		2177.12		2176.95	-0.1748	-80	1	19	MVVQSQLVFDHFAPIKSC												Mascot
									K
		2507.13		2507.14	0.0105	4	175	196	SDCCFRLNHYPPCPELE												Mascot
									ALSGR
		2931.4		2931.26	-0.1477	-50	135	160	CLVEEYISAMKEMACQVL												Mascot
									ELMAEGLK
		3189.51		3189.34	-0.1683	-53	227	255	DGNWVSVPPDHTSFFIN												Mascot
									VGDSLQVMTNGR
	3	hypothetical protein Csa_3G016410 [Cucumis sativus]										KGN55796.1		69848	8.2		14	39	0
		Protein Group
		PREDICTED: probable methyltransferase PMT14										XP_004150171.1		69848		8.1999
		[Cucumis sativus]														998092
																6514
Project 1\Sample project20170120\R17064-5																				39	of	96
		Peptide Information
		Calc. Mass		Obsrv. Mass	± da	± ppm	Start	End	Sequence			Ion	C. I. %	Modification						Rank	Result Type
							Seq.	Seq.				Score
		1087.63		1087.57	-0.0603	-55	225	234	NVLAISFAPR												Mascot
		1302.73		1302.65	-0.0789	-61	447	457	INNLIGSPRYR												Mascot
		1436.71		1436.68	-0.032	-22	132	143	GYMTPFPWPKGR												Mascot
		1479.71		1479.79	0.0778	53	578	590	LMDHEDGPLVPEK												Mascot
		1495.71		1495.68	-0.0339	-23	578	590	LMDHEDGPLVPEK					Oxidation (M)[2]							Mascot
		1502.62		1502.66	0.0365	24	89	100	FTDYTPCQEQDR												Mascot
		1581.78		1581.72	-0.0601	-38	142	154	GRDYVHYANVPYK												Mascot
		1687.74		1687.83	0.0929	55	88	100	KFTDYTPCQEQDR					Carbamidomethyl (C)[8]							Mascot
		1687.74		1687.83	0.0929	55	88	100	KFTDYTPCQEQDR					Carbamidomethyl (C)[8]							Mascot
		1859.9		1859.95	0.0549	30	206	223	TALDTGCGVASWGAYLF												Mascot
									K
		1946.92		1946.88	-0.0379	-19	458	476	NVMDMNANLGGFAAAVH												Mascot
									SK
		2008.98		2008.93	-0.0453	-23	42	59	GDSIAMEITRLSNCNTVK					Carbamidomethyl (C)[14]							Mascot
		2188.97		2188.96	-0.0159	-7	276	293	CLIPWTSNEGMYLMEVD					Oxidation (M)[11,14]							Mascot
									R
		2225.07		2225.1	0.0308	14	60	78	DLNFETHHSIEIVESTEPK												Mascot
		2282.08		2282.08	0.0002	0	456	476	YRNVMDMNANLGGFAAA					Oxidation (M)[5]							Mascot
									VHSK
		2298.08		2298.15	0.0767	33	456	476	YRNVMDMNANLGGFAAA					Oxidation (M)[5,7]							Mascot
									VHSK
		3312.43		3312.3	-0.123	-37	267	293	SFDMAQCSRCLIPWTSN					Carbamidomethyl (C)[7,10], Oxidation (M)[4]							Mascot
									EGMYLMEVDR
	4	PREDICTED: intracellular protein transport protein										XP_011651980.1		144430	5.16		21	38	0
		USO1 isoform X1 [Cucumis sativus]
		Peptide Information
		Calc. Mass		Obsrv. Mass	± da	± ppm	Start	End	Sequence			Ion	C. I. %	Modification						Rank	Result Type
							Seq.	Seq.				Score
		811.377		811.325	-0.0515	-63	890	895	DFNIMR					Oxidation (M)[5]							Mascot
		870.504		870.545	0.0403	46	799	805	VKEPLER												Mascot
		927.464		927.378	-0.0868	-94	1114	1122	TVGQNHSGK												Mascot
		927.48		927.495	0.0158	17	806	812	SAQYFRR												Mascot
		1087.56		1087.57	0.0026	2	1170	1179	ELAEALEANK												Mascot
		1302.68		1302.65	-0.0299	-23	723	733	LEIETENVDLK												Mascot
		1345.63		1345.72	0.0834	62	1127	1138	DPNSNQSQSQIK												Mascot
		1362.69		1362.59	-0.0942	-69	993	1004	TVAELEDSKQSR												Mascot
		1402.68		1402.55	-0.1272	-91	914	925	QNQETLIADNEK												Mascot
		1402.68		1402.55	-0.1272	-91	914	925	QNQETLIADNEK												Mascot
Project 1\Sample project20170120\R17064-5				1402.55																40	Mascot	of	96
		1567.72		1567.74	0.0241	15	746	757	AQDQCEYLQREK					Carbamidomethyl (C)[5]							Mascot
		1760.86		1760.85	-0.0144	-8	1240	1253	YAEVEHQREELVMK												Mascot
		1765.9		1765.77	-0.1305	-74	942	956	NSVNDLEQKLYVSEK												Mascot
		1768.87		1768.78	-0.0852	-48	785	798	NFELHEGYFRLESK												Mascot
		1776.86		1776.78	-0.078	-44	1240	1253	YAEVEHQREELVMK					Oxidation (M)[13]							Mascot
		1776.86		1776.78	-0.078	-44	1240	1253	YAEVEHQREELVMK					Oxidation (M)[13]							Mascot
		1915.9		1915.87	-0.0346	-18	81	97	EFEDCNFKLVVAMGSAR												Mascot
		2008.81		2008.93	0.1189	59	164	181	EGHDSDSCSDITDSQLS					Carbamidomethyl (C)[8]							Mascot
									R
		2177.1		2176.95	-0.1486	-68	970	988	VQLQKTAHFQDEVFASS												Mascot
									NK
		2177.1		2176.95	-0.1486	-68	970	988	VQLQKTAHFQDEVFASS												Mascot
									NK
		2767.41		2767.16	-0.2495	-90	536	561	GGSLALNSTGDSMKFEL												Mascot
									EIIVEELSK
		2807.38		2807.31	-0.0691	-25	1014	1039	IGSGSVVEETSFPGIDDL												Mascot
									RNELCEIK
		2914.45		2914.48	0.0322	11	89	115	LVVAMGSARSNILGETMV												Mascot
									NMTNYIDSK
		3175.54		3175.57	0.0254	8	338	364	TSIEDLSYQDGEPHILNEL												Mascot
									KDELNFQK
		3348.59		3348.62	0.0293	9	240	271	QDSVSSQNSAPCLSPNS					Carbamidomethyl (C)[12]							Mascot
									VITGSAEATTIEELR
	5	PREDICTED: histone-lysine N-methyltransferase										XP_011652072.1		31785.8	6.75		9	36	0
		ATXR4 isoform X4 [Cucumis sativus]
		Peptide Information
		Calc. Mass		Obsrv. Mass	± da	± ppm	Start	End	Sequence			Ion	C. I. %	Modification						Rank	Result Type
							Seq.	Seq.				Score
		1087.49		1087.57	0.0754	69	238	246	DVDPDEELR												Mascot
		1166.55		1166.47	-0.0835	-72	113	122	YANVDSDARR												Mascot
		1412.68		1412.73	0.0515	36	8	19	EMASCSLVRFGR					Carbamidomethyl (C)[5]							Mascot
		1495.72		1495.68	-0.0427	-29	273	285	CARCSYGINPIWL												Mascot
		1758.81		1758.81	-0.0057	-3	2	16	EYTVDREMASCSLVR												Mascot
		1946.88		1946.88	0.0062	3	1	16	MEYTVDREMASCSLVR					Carbamidomethyl (C)[12]							Mascot
		2284.09		2284.12	0.0388	17	247	265	ICYIDASMDYDARQTLLH												Mascot
									R
		2300.08		2300.14	0.0623	27	247	265	ICYIDASMDYDARQTLLH					Oxidation (M)[8]							Mascot
									R
		2677.14		2677.27	0.132	49	238	259	DVDPDEELRICYIDASMD					Carbamidomethyl (C)[11], Oxidation (M)[17]							Mascot
									YDAR
		3660.81		3660.58	-0.2241	-61	26	61	FPYTQAKPFSSPSPFSSS												Mascot
									AGLRDADSAAPGGPPPI
									R
	6	high-affinity nitrate transporter NRT2.1, partial [Cucumis										AGO64297.1		1888.8	4.89		3	34	0
		sativus]
Project 1\Sample project20170120\R17064-5																				41	of	96
		Protein Group
		high-affinity nitrate transporter, partial [Cucumis sativus]										ADD13996.1		1888.8		4.8899
																998664
																856
		Peptide Information
		Calc. Mass		Obsrv. Mass	± da	± ppm	Start	End	Sequence			Ion	C. I. %	Modification						Rank	Result Type
							Seq.	Seq.				Score
		1629.73		1629.72	-0.0072	-4	2	18	GDVEGSPGSSMHGVTG												Mascot
									R
		1758.77		1758.81	0.038	22	2	19	GDVEGSPGSSMHGVTG												Mascot
									RE
		1760.77		1760.85	0.08	45	1	18	MGDVEGSPGSSMHGVT												Mascot
									GR
		1776.76		1776.78	0.0165	9	1	18	MGDVEGSPGSSMHGVT					Oxidation (M)[1]							Mascot
									GR
		1776.76		1776.78	0.0165	9	1	18	MGDVEGSPGSSMHGVT					Oxidation (M)[1]							Mascot
									GR
	7	hypothetical protein Csa_1G031210 [Cucumis sativus]										KGN63946.1		35595.6	9.81		9	34	0
		Peptide Information
		Calc. Mass		Obsrv. Mass	± da	± ppm	Start	End	Sequence			Ion	C. I. %	Modification						Rank	Result Type
							Seq.	Seq.				Score
		1479.83		1479.79	-0.0393	-27	81	93	GDHLFIVNVQIPK												Mascot
		1629.85		1629.72	-0.1237	-76	66	80	LSCMGIPDINKPSVR												Mascot
		1736.79		1736.77	-0.0291	-17	131	146	HTDENQGNHASSQAIK												Mascot
		1795.83		1795.72	-0.1114	-62	179	195	LANNGCNSNFSLLDGEK												Mascot
		1823.83		1823.89	0.0596	33	115	130	NDEVYTHGMPLGTFDK												Mascot
		1892.9		1892.92	0.0263	14	131	147	HTDENQGNHASSQAIKR												Mascot
		1932.94		1932.88	-0.0674	-35	267	281	SYTMARPLFQQFHYK					Oxidation (M)[4]							Mascot
		2221.18		2221.1	-0.0794	-36	43	63	VETVEGLKDLQIPAGVQP												Mascot
									GDR
		2720.35		2720.27	-0.0791	-29	267	288	SYTMARPLFQQFHYKML					Oxidation (M)[4]							Mascot
									QGMVK
	8	PREDICTED: histone-lysine N-methyltransferase										XP_011652069.1		38861.1	6.01		10	34	0
		ATXR4 isoform X1 [Cucumis sativus]
		Peptide Information
		Calc. Mass		Obsrv. Mass	± da	± ppm	Start	End	Sequence			Ion	C. I. %	Modification						Rank	Result Type
							Seq.	Seq.				Score
		1087.49		1087.57	0.0754	69	299	307	DVDPDEELR												Mascot
		1166.55		1166.47	-0.0835	-72	113	122	YANVDSDARR												Mascot
		1412.68		1412.73	0.0515	36	8	19	EMASCSLVRFGR					Carbamidomethyl (C)[5]							Mascot
		1495.72		1495.68	-0.0427	-29	334	346	CARCSYGINPIWL												Mascot
Project 1\Sample project20170120\R17064-5																				42	of	96
		1758.81		1758.81	-0.0057	-3	2	16	EYTVDREMASCSLVR												Mascot
		1946.88		1946.88	0.0062	3	1	16	MEYTVDREMASCSLVR					Carbamidomethyl (C)[12]							Mascot
		2284.09		2284.12	0.0388	17	308	326	ICYIDASMDYDARQTLLH												Mascot
									R
		2300.08		2300.14	0.0623	27	308	326	ICYIDASMDYDARQTLLH					Oxidation (M)[8]							Mascot
									R
		2401.17		2401.26	0.0948	39	167	188	LACMVISGAMSSDHLDIL					Carbamidomethyl (C)[3]							Mascot
									QPSR
		2677.14		2677.27	0.132	49	299	320	DVDPDEELRICYIDASMD					Carbamidomethyl (C)[11], Oxidation (M)[17]							Mascot
									YDAR
		3660.81		3660.58	-0.2241	-61	26	61	FPYTQAKPFSSPSPFSSS												Mascot
									AGLRDADSAAPGGPPPI
									R
	9	hypothetical protein Csa_5G608030 [Cucumis sativus]										KGN52015.1		74464.7	8.32		9	33	0		18	0
		Protein Group
		PREDICTED: uridine-cytidine kinase C isoform X1										XP_011655738.1		74551.7		8.3199
		[Cucumis sativus]														996948
																2422
		PREDICTED: uridine-cytidine kinase C isoform X1										XP_011655737.1		74551.7		8.3199
		[Cucumis sativus]														996948
																2422
		PREDICTED: uridine-cytidine kinase C isoform X2										XP_004135132.1		74464.7		8.3199
		[Cucumis sativus]														996948
																2422
		Peptide Information
		Calc. Mass		Obsrv. Mass	± da	± ppm	Start	End	Sequence			Ion	C. I. %	Modification						Rank	Result Type
							Seq.	Seq.				Score
		1302.68		1302.65	-0.03	-23	428	439	LSLDEDLVSSPK												Mascot
		1412.8		1412.73	-0.072	-51	181	193	VSVRGGVHFDLVK												Mascot
		1419.68		1419.58	-0.0994	-70	582	594	DSPIMDEISGISR												Mascot
		1419.68		1419.58	-0.0994	-70	582	594	DSPIMDEISGISR			18	0								Mascot
		1612.78		1612.68	-0.1002	-62	473	486	LSGYGSNNQRFVDR												Mascot
		1612.78		1612.68	-0.1002	-62	473	486	LSGYGSNNQRFVDR												Mascot
		1687.89		1687.83	-0.0625	-37	413	427	LVNEVMALPDDLKSK					Oxidation (M)[6]							Mascot
		1687.89		1687.83	-0.0625	-37	413	427	LVNEVMALPDDLKSK					Oxidation (M)[6]							Mascot
		1760.86		1760.85	-0.0104	-6	582	597	DSPIMDEISGISRGQR												Mascot
		1776.85		1776.78	-0.074	-42	582	597	DSPIMDEISGISRGQR					Oxidation (M)[5]							Mascot
		1776.85		1776.78	-0.074	-42	582	597	DSPIMDEISGISRGQR					Oxidation (M)[5]							Mascot
		1858.98		1858.96	-0.0151	-8	428	444	LSLDEDLVSSPKEALSR												Mascot
		1954.99		1954.9	-0.0999	-51	598	613	QVMHQLDCLSNLLRER												Mascot
		2420.09		2420.11	0.012	5	85	105	IMNFMPSIAIISMDDYNDA					Oxidation (M)[2]							Mascot
									SR
Project 1\Sample project20170120\R17064-5																				43	of	96
	10	hypothetical protein Csa_3G134930 [Cucumis sativus]										KGN56845.1		15455.5	10.19		6	33	0
		Protein Group
		PREDICTED: 60S ribosomal protein L14-2-like										XP_004134055.1		15455.5		10.189
		[Cucumis sativus]														999580
																3833
		Peptide Information
		Calc. Mass		Obsrv. Mass	± da	± ppm	Start	End	Sequence			Ion	C. I. %	Modification						Rank	Result Type
							Seq.	Seq.				Score
		1150.53		1150.48	-0.0449	-39	84	92	WEDSSWGRK												Mascot
		1150.53		1150.48	-0.0449	-39	83	91	KWEDSSWGR												Mascot
		1479.72		1479.79	0.0745	50	70	82	ELMEAMKAADVQK					Oxidation (M)[3]							Mascot
		1495.71		1495.68	-0.0373	-25	70	82	ELMEAMKAADVQK					Oxidation (M)[3,6]							Mascot
		1837.89		1837.91	0.0213	12	36	51	ALVDAPDMVRSQMNFK					Oxidation (M)[8]							Mascot
		2045.03		2045.02	-0.0098	-5	6	23	YVEIGRVALVNYGEDYGK												Mascot
		2691.44		2691.29	-0.1499	-56	12	35	VALVNYGEDYGKLVVIVD												Mascot
									VIDQNR
Project 1\Sample project20170120\R17064-5																				44	of	96
Gel Idx/Pos			305/M7						Instr./Gel Origin		BA2151/Sample Project 20170120					Process Status			Analysis Succeeded
Plate [#] Name			[1] Sample Project 20170120						Instrument Sample Name							Spectra			11
Rank		Protein Name						Species				Accession No.		Protein MW		Protein	Pep.	Protein	Protein		Total Ion	Total Ion
																PI	Count	Score	Score		Score	C. I. %
																			C. I. %
	1	hypothetical protein Csa_3G386310 [Cucumis sativus]										KGN57907.1		56734.5	8.6		17	449	100		375	100
		Protein Group
		PREDICTED: 11S globulin subunit beta-like [Cucumis										XP_004152049.1		56734.5		8.6
		sativus]														3814
																6973
		Peptide Information
		Calc. Mass		Obsrv. Mass	± da	± ppm	Start	End	Sequence			Ion	C. I. %	Modification						Rank	Result Type
							Seq.	Seq.				Score
		874.456		874.458	0.0013	1	391	397	VQVVNCR					Carbamidomethyl (C)[6]							Mascot
		895.438		895.438	-0.0003	0	37	43	EGQSRYR												Mascot
		968.487		968.481	-0.0061	-6	104	111	LMYIESGR												Mascot
		984.482		984.47	-0.0117	-12	104	111	LMYIESGR					Oxidation (M)[2]							Mascot
		1273.65		1273.63	-0.011	-9	47	57	LDMLEALEPSR												Mascot
		1429.75		1429.73	-0.0151	-11	47	58	LDMLEALEPSRR												Mascot
		1790.87		1790.84	-0.0336	-19	115	130	GVVLPGCPQTYQESQK					Carbamidomethyl (C)[7]							Mascot
		1952.88		1952.87	-0.0054	-3	323	340	ENIGDASRADMYTPEAG												Mascot
									R
		1954.9		1954.88	-0.0172	-9	190	205	AFYLAGNPEEEFPEWR												Mascot
		1954.9		1954.88	-0.0172	-9	190	205	AFYLAGNPEEEFPEWR			107	100								Mascot
		1968.87		1968.9	0.0239	12	323	340	ENIGDASRADMYTPEAG					Oxidation (M)[11]							Mascot
									R
		1970.84		1970.88	0.0399	20	307	322	WDDNGLDETICSMRMK					Carbamidomethyl (C)[11]							Mascot
		1970.84		1970.88	0.0399	20	307	322	WDDNGLDETICSMRMK					Carbamidomethyl (C)[11]							Mascot
		1986.84		1986.87	0.0347	17	307	322	WDDNGLDETICSMRMK					Carbamidomethyl (C)[11], Oxidation (M)[13]							Mascot
		1986.84		1986.87	0.0347	17	307	322	WDDNGLDETICSMRMK					Carbamidomethyl (C)[11], Oxidation (M)[13]							Mascot
		2058.1		2058.08	-0.0225	-11	86	103	YIIDPNGLLLPQYTNAPR												Mascot
		2058.1		2058.08	-0.0225	-11	86	103	YIIDPNGLLLPQYTNAPR			110	100								Mascot
		2225.07		2225.08	0.0173	8	476	494	FNREETNLIPPSMSSYRP					Oxidation (M)[13]							Mascot
									A
		2233.01		2232.99	-0.0179	-8	59	77	IEAEGGVIEMWDPSHEM												Mascot
									FR
		2233.01		2232.99	-0.0179	-8	59	77	IEAEGGVIEMWDPSHEM			29	88.482								Mascot
									FR
		2249		2248.97	-0.0314	-14	59	77	IEAEGGVIEMWDPSHEM					Oxidation (M)[10]							Mascot
									FR
		2249		2248.97	-0.0314	-14	59	77	IEAEGGVIEMWDPSHEM					Oxidation (M)[10]							Mascot
									FR
Project 1\Sample project20170120\R17064-5																				45	of	96
		2265		2264.96	-0.031	-14	59	77	IEAEGGVIEMWDPSHEM					Oxidation (M)[10,17]							Mascot
									FR
		2320.06		2320.03	-0.0354	-15	147	168	AGDLFAVPAGSAHWTYN												Mascot
									DGNEK
		2320.06		2320.03	-0.0354	-15	147	168	AGDLFAVPAGSAHWTYN			89	100								Mascot
									DGNEK
		2371.29		2371.26	-0.0249	-11	169	189	LIAVVLLDVSNHANQLDF												Mascot
									HPR
		2371.29		2371.26	-0.0249	-11	169	189	LIAVVLLDVSNHANQLDF			41	99.221								Mascot
									HPR
		2378.98		2379.13	0.1465	62	282	299	GEEQEWEEEQEEEMQR												Mascot
									QR
		2389.11		2389.08	-0.0314	-13	58	77	RIEAEGGVIEMWDPSHE												Mascot
									MFR
		2405.1		2405.07	-0.0342	-14	58	77	RIEAEGGVIEMWDPSHE					Oxidation (M)[11]							Mascot
									MFR
		2405.1		2405.07	-0.0342	-14	58	77	RIEAEGGVIEMWDPSHE					Oxidation (M)[11]							Mascot
									MFR
		2421.1		2421.06	-0.0349	-14	58	77	RIEAEGGVIEMWDPSHE					Oxidation (M)[11,18]							Mascot
									MFR
		2664.4		2664.25	-0.1504	-56	2	25	GNPLHFLSLSLCFLVLFN					Carbamidomethyl (C)[12]							Mascot
									GCLATK
	2	hypothetical protein Csa_3G384800 [Cucumis sativus]										KGN57905.1		57575.8	7.21		8	277	100		258	100
		Protein Group
		PREDICTED: 11S globulin subunit beta [Cucumis										XP_011651441.1		57575.8		7.21
		sativus]														381
																4697
		Peptide Information
		Calc. Mass		Obsrv. Mass	± da	± ppm	Start	End	Sequence			Ion	C. I. %	Modification						Rank	Result Type
							Seq.	Seq.				Score
		1952.88		1952.87	-0.0054	-3	323	340	ENIGDASRADMYTPEAG												Mascot
									R
		1954.9		1954.88	-0.0172	-9	190	205	AFYLAGNPEEEFPEWR												Mascot
		1954.9		1954.88	-0.0172	-9	190	205	AFYLAGNPEEEFPEWR			107	100								Mascot
		1968.87		1968.9	0.0239	12	323	340	ENIGDASRADMYTPEAG					Oxidation (M)[11]							Mascot
									R
		1970.84		1970.88	0.0399	20	307	322	WDDNGLDETICSMRMK					Carbamidomethyl (C)[11]							Mascot
		1970.84		1970.88	0.0399	20	307	322	WDDNGLDETICSMRMK					Carbamidomethyl (C)[11]							Mascot
		1986.84		1986.87	0.0347	17	307	322	WDDNGLDETICSMRMK					Carbamidomethyl (C)[11], Oxidation (M)[13]							Mascot
		1986.84		1986.87	0.0347	17	307	322	WDDNGLDETICSMRMK					Carbamidomethyl (C)[11], Oxidation (M)[13]							Mascot
		2058.1		2058.08	-0.0225	-11	86	103	YIIDPNGLLLPQYTNAPR												Mascot
		2058.1		2058.08	-0.0225	-11	86	103	YIIDPNGLLLPQYTNAPR			110	100								Mascot
		2247.02		2247.05	0.0242	11	59	77	IEAEGGIIEMWDPSHEMF												Mascot
									R
		2263.02		2263.01	-0.0061	-3	59	77	IEAEGGIIEMWDPSHEMF					Oxidation (M)[10]							Mascot
									R
		2371.29		2371.26	-0.0249	-11	169	189	LIAVVLLDVSNHANQLDF												Mascot
									HPR
		2371.29		2371.26	-0.0249	-11	169	189	LIAVVLLDVSNHANQLDF			41	99.221								Mascot
Project 1\Sample project20170120\R17064-5				2371.26																46	Mascot	of	96
									HPR
		2378.98		2379.13	0.1465	62	282	299	GEEQEWEEEQEEEMQR												Mascot
									QR
		2403.12		2403.2	0.0815	34	58	77	RIEAEGGIIEMWDPSHEM												Mascot
									FR
	3	hypothetical protein Csa_3G835880 [Cucumis sativus]										KGN59651.1		244398	5.21		31	45	0
		Peptide Information
		Calc. Mass		Obsrv. Mass	± da	± ppm	Start	End	Sequence			Ion	C. I. %	Modification						Rank	Result Type
							Seq.	Seq.				Score
		832.341		832.308	-0.0323	-39	442	447	SCWHDK					Carbamidomethyl (C)[2]							Mascot
		857.484		857.431	-0.0529	-62	1057	1064	LPTNVGTR												Mascot
		895.412		895.438	0.0253	28	2029	2035	KICMDNR					Oxidation (M)[4]							Mascot
		912.457		912.459	0.0016	2	2036	2043	FSEFGIGR												Mascot
		968.487		968.481	-0.0061	-6	1871	1878	CNIKFESK												Mascot
		1273.6		1273.63	0.0327	26	1747	1757	SNNQSPEEQLK												Mascot
		1460.68		1460.65	-0.0384	-26	690	701	IQSCSSYQFVNK					Carbamidomethyl (C)[4]							Mascot
		1553.71		1553.83	0.117	75	1879	1892	QEESSSMVIAETSR												Mascot
		1699.88		1699.81	-0.0671	-39	216	230	MGLEDVLQQNQVIGR												Mascot
		1762.89		1762.83	-0.0522	-30	472	488	CPCSAFPIPVGSTVLSK					Carbamidomethyl (C)[1]							Mascot
		1812.79		1812.84	0.0506	28	1327	1342	IPEGNWYCPSCVMGTR												Mascot
		1937.02		1936.89	-0.1257	-65	1768	1785	LECSGFLVNRASALLESK												Mascot
		1959.9		1959.89	-0.0118	-6	588	603	MSYDLIKACSELCNQK					Carbamidomethyl (C)[9,13]							Mascot
		1998.98		1998.87	-0.1028	-51	287	304	QSVDSSELYAIYRAPDGK												Mascot
		2044.95		2045	0.0537	26	1875	1892	FESKQEESSSMVIAETSR												Mascot
		2053.91		2053.97	0.0588	29	608	624	LCCNHVGNEQSLLGHCR					Carbamidomethyl (C)[2,3,16]							Mascot
		2073.92		2074.06	0.134	65	721	737	FDGEDCKEDEPLNFLFR												Mascot
		2080.08		2080.05	-0.0271	-13	673	689	FGLDMEFVQEILEKIPR					Oxidation (M)[5]							Mascot
		2082.95		2083	0.0425	20	1455	1474	LDTTMLSAVREGQGSCD					Oxidation (M)[5]							Mascot
									GAR
		2194.02		2194.01	-0.0043	-2	842	860	FNANGDPHAFIQMETRA					Oxidation (M)[13]							Mascot
									MK
		2228.09		2228.09	-0.0086	-4	2101	2120	SAGTIYEMVQATIALEDMI					Oxidation (M)[8]							Mascot
									R
		2247		2247.05	0.0413	18	92	112	GHVVVCDGCERGFHLAC												Mascot
									TGMR
		2249.08		2248.97	-0.1081	-48	838	857	VSSKFNANGDPHAFIQM												Mascot
									ETR
		2249.08		2248.97	-0.1081	-48	838	857	VSSKFNANGDPHAFIQM												Mascot
									ETR
		2263		2263.01	0.011	5	92	112	GHVVVCDGCERGFHLAC					Oxidation (M)[20]							Mascot
									TGMR
		2265.07		2264.96	-0.1077	-48	838	857	VSSKFNANGDPHAFIQM					Oxidation (M)[17]							Mascot
									ETR
		2287.08		2287.03	-0.05	-22	1016	1036	EKHIITIEEETPDTTGGGC												Mascot
									EK
Project 1\Sample project20170120\R17064-5																				47	of	96
		2302.91		2303.03	0.1223	53	1904	1921	YQNDGMMCPYDFELICS					Carbamidomethyl (C)[8,16], Oxidation							Mascot
									K					(M)[6,7]
		2320.02		2320.03	0.0073	3	92	112	GHVVVCDGCERGFHLAC					Carbamidomethyl (C)[6], Oxidation (M)[20]							Mascot
									TGMR
		2320.02		2320.03	0.0073	3	92	112	GHVVVCDGCERGFHLAC					Carbamidomethyl (C)[6], Oxidation (M)[20]							Mascot
									TGMR
		2325.16		2325.05	-0.1045	-45	1786	1804	YGPFLEFVTPDDLNRWL												Mascot
									DK
		2342.1		2342.02	-0.0784	-33	305	325	TFGSVYEVACHLGLMSS					Carbamidomethyl (C)[10]							Mascot
									MQPK
		2352.08		2352.03	-0.0573	-24	2162	2182	ISPNQDSNDYLDTTSSIP												Mascot
									EQK
		2379.01		2379.13	0.1182	50	1816	1834	CVCMEPVWPSRYHCLSC					Carbamidomethyl (C)[1], Oxidation (M)[4]							Mascot
									HR
		2401.11		2401.25	0.147	61	604	624	NTFRLCCNHVGNEQSLL												Mascot
									GHCR
		2720.41		2720.24	-0.1682	-62	2068	2091	MNLLDMDAALPDEALKP												Mascot
									SKLHIER
	4	PREDICTED: methyl-CpG-binding domain-containing										XP_011652272.1		244529	5.21		31	45	0
		protein 9 [Cucumis sativus]
		Peptide Information
		Calc. Mass		Obsrv. Mass	± da	± ppm	Start	End	Sequence			Ion	C. I. %	Modification						Rank	Result Type
							Seq.	Seq.				Score
		832.341		832.308	-0.0323	-39	443	448	SCWHDK					Carbamidomethyl (C)[2]							Mascot
		857.484		857.431	-0.0529	-62	1058	1065	LPTNVGTR												Mascot
		895.412		895.438	0.0253	28	2030	2036	KICMDNR					Oxidation (M)[4]							Mascot
		912.457		912.459	0.0016	2	2037	2044	FSEFGIGR												Mascot
		968.487		968.481	-0.0061	-6	1872	1879	CNIKFESK												Mascot
		1273.6		1273.63	0.0327	26	1748	1758	SNNQSPEEQLK												Mascot
		1460.68		1460.65	-0.0384	-26	691	702	IQSCSSYQFVNK					Carbamidomethyl (C)[4]							Mascot
		1553.71		1553.83	0.117	75	1880	1893	QEESSSMVIAETSR												Mascot
		1699.88		1699.81	-0.0671	-39	217	231	MGLEDVLQQNQVIGR												Mascot
		1762.89		1762.83	-0.0522	-30	473	489	CPCSAFPIPVGSTVLSK					Carbamidomethyl (C)[1]							Mascot
		1812.79		1812.84	0.0506	28	1328	1343	IPEGNWYCPSCVMGTR												Mascot
		1937.02		1936.89	-0.1257	-65	1769	1786	LECSGFLVNRASALLESK												Mascot
		1959.9		1959.89	-0.0118	-6	589	604	MSYDLIKACSELCNQK					Carbamidomethyl (C)[9,13]							Mascot
		1998.98		1998.87	-0.1028	-51	288	305	QSVDSSELYAIYRAPDGK												Mascot
		2044.95		2045	0.0537	26	1876	1893	FESKQEESSSMVIAETSR												Mascot
		2053.91		2053.97	0.0588	29	609	625	LCCNHVGNEQSLLGHCR					Carbamidomethyl (C)[2,3,16]							Mascot
		2073.92		2074.06	0.134	65	722	738	FDGEDCKEDEPLNFLFR												Mascot
		2080.08		2080.05	-0.0271	-13	674	690	FGLDMEFVQEILEKIPR					Oxidation (M)[5]							Mascot
		2082.95		2083	0.0425	20	1456	1475	LDTTMLSAVREGQGSCD					Oxidation (M)[5]							Mascot
									GAR
		2194.02		2194.01	-0.0043	-2	843	861	FNANGDPHAFIQMETRA					Oxidation (M)[13]							Mascot
Project 1\Sample project20170120\R17064-5				2194.01																48	Mascot	of	96
									MK
		2228.09		2228.09	-0.0086	-4	2102	2121	SAGTIYEMVQATIALEDMI					Oxidation (M)[8]							Mascot
									R
		2247		2247.05	0.0413	18	93	113	GHVVVCDGCERGFHLAC												Mascot
									TGMR
		2249.08		2248.97	-0.1081	-48	839	858	VSSKFNANGDPHAFIQM												Mascot
									ETR
		2249.08		2248.97	-0.1081	-48	839	858	VSSKFNANGDPHAFIQM												Mascot
									ETR
		2263		2263.01	0.011	5	93	113	GHVVVCDGCERGFHLAC					Oxidation (M)[20]							Mascot
									TGMR
		2265.07		2264.96	-0.1077	-48	839	858	VSSKFNANGDPHAFIQM					Oxidation (M)[17]							Mascot
									ETR
		2287.08		2287.03	-0.05	-22	1017	1037	EKHIITIEEETPDTTGGGC												Mascot
									EK
		2302.91		2303.03	0.1223	53	1905	1922	YQNDGMMCPYDFELICS					Carbamidomethyl (C)[8,16], Oxidation							Mascot
									K					(M)[6,7]
		2320.02		2320.03	0.0073	3	93	113	GHVVVCDGCERGFHLAC					Carbamidomethyl (C)[6], Oxidation (M)[20]							Mascot
									TGMR
		2320.02		2320.03	0.0073	3	93	113	GHVVVCDGCERGFHLAC					Carbamidomethyl (C)[6], Oxidation (M)[20]							Mascot
									TGMR
		2325.16		2325.05	-0.1045	-45	1787	1805	YGPFLEFVTPDDLNRWL												Mascot
									DK
		2342.1		2342.02	-0.0784	-33	306	326	TFGSVYEVACHLGLMSS					Carbamidomethyl (C)[10]							Mascot
									MQPK
		2352.08		2352.03	-0.0573	-24	2163	2183	ISPNQDSNDYLDTTSSIP												Mascot
									EQK
		2379.01		2379.13	0.1182	50	1817	1835	CVCMEPVWPSRYHCLSC					Carbamidomethyl (C)[1], Oxidation (M)[4]							Mascot
									HR
		2401.11		2401.25	0.147	61	605	625	NTFRLCCNHVGNEQSLL												Mascot
									GHCR
		2720.41		2720.24	-0.1682	-62	2069	2092	MNLLDMDAALPDEALKP												Mascot
									SKLHIER
	5	hypothetical protein Csa_4G652870 [Cucumis sativus]										KGN55475.1		57801	6.04		12	37	0
		Protein Group
		PREDICTED: tRNA pseudouridine synthase A,										XP_004145528.1		57801		6.0399
		mitochondrial-like [Cucumis sativus]														999618
																5303
[truncated: 1,863 more rows]
[truncated: 1 more columns]
