# Supplementary material for: The role and proteomic analysis of ethylene in hydrogen gas-induced adventitious rooting development in cucumber (Cucumis sativus L.) explants
Source: PeerJ. 2020 Apr 7;8:e8896. doi: 10.7717/peerj.8896 (PMC7147439; doi:10.7717/peerj.8896)
Supplement: Supplemental Information 10 [file peerj-08-8896-s016.xlt]

## Sheet: Sheet1
Analysis Information
	Report Type			Protein-Peptide Summary by Spot						Analysis Type			Combined (MS+MS/MS)
	Sample Set Name			Sample project20170120						Database			NCBI_cucumis_sat
	Analysis Name			R17064-4						Creation Date			02/24/2017 18:27:43
	Reported By			02/27/2017 13:14:02 - admin						Last Modified			02/24/2017 18:31:01
		MS Acq. : Proc. Methods				(Unspecified) : (Unspecified)
		Interpretation Method				(Unspecified)
Gel Idx/Pos			270/K22						Instr./Gel Origin		BA2151/Sample Project 20170120						Process Status			Analysis Succeeded
Plate [#] Name			[1] Sample Project 20170120						Instrument Sample Name								Spectra			11
Rank		Protein Name						Species				Accession No.			Protein MW		Protein	Pep.	Protein	Protein	Total Ion	Total Ion
																	PI	Count	Score	Score	Score	C. I. %
																				C. I. %
	1	hypothetical protein Csa_1G569300 [Cucumis sativus]										KGN66053.1			47584.5	4.96		24	244	100	105	100
		Protein Group
		PREDICTED: 26S protease regulatory subunit 6A										XP_004135596.1			47584.5		4.96
		homolog [Cucumis sativus]															381
																	4697
		Peptide Information
		Calc. Mass		Obsrv. Mass	± da	± ppm	Start	End	Sequence			Ion	C. I. %		Modification					Rank	Result Type
							Seq.	Seq.				Score
		872.484		872.524	0.0403	46	30	36	LLDNEIR												Mascot
		1114.59		1114.64	0.0471	42	319	328	ADILDPALMR												Mascot
		1130.59		1130.63	0.0466	41	319	328	ADILDPALMR						Oxidation (M)[9]						Mascot
		1139.54		1139.59	0.0533	47	45	53	TNLEWDSFK												Mascot
		1158.65		1158.69	0.0386	33	206	217	GVLLYGPPGTGK												Mascot
		1167.54		1167.58	0.045	39	279	288	RFDSEVSGDR												Mascot
		1195.56		1195.62	0.0573	48	371	381	STDDFNGAQLK												Mascot
		1289.67		1289.72	0.0523	41	382	393	AVCVEAGMLALR						Carbamidomethyl (C)[3]						Mascot
		1305.67		1305.72	0.0507	39	382	393	AVCVEAGMLALR						Carbamidomethyl (C)[3], Oxidation (M)[8]						Mascot
		1325.65		1325.7	0.0506	38	336	346	IEFPHPTEEAR												Mascot
		1453.74		1453.8	0.0571	39	335	346	KIEFPHPTEEAR												Mascot
		1453.74		1453.8	0.0571	39	335	346	KIEFPHPTEEAR												Mascot
		1640.93		1640.97	0.0468	29	114	128	QTIFLPVVGLVDPDK												Mascot
Project 1\Sample project20170120\R17064-4																				of	1	184
		1644.88		1644.93	0.0548	33	235	250	LAGPQLVQMFIGDGAK												Mascot
		1660.87		1660.91	0.0422	25	235	250	LAGPQLVQMFIGDGAK						Oxidation (M)[9]						Mascot
		1670.8		1670.86	0.0629	38	357	370	MNVHPDVNFEELAR												Mascot
		1686.79		1686.86	0.067	40	357	370	MNVHPDVNFEELAR						Oxidation (M)[1]						Mascot
		1791.92		1791.97	0.0496	28	263	278	SPCIIFIDEIDAIGTK						Carbamidomethyl (C)[3]						Mascot
		1798.89		1798.95	0.0645	36	356	370	KMNVHPDVNFEELAR												Mascot
		1814.89		1814.94	0.0583	32	356	370	KMNVHPDVNFEELAR						Oxidation (M)[2]						Mascot
		1828.82		1828.95	0.1359	74	40	53	EEMQRTNLEWDSFK						Oxidation (M)[3]						Mascot
		1865.02		1865.06	0.0422	23	178	193	QIQELVEAIVLPMTHK						Oxidation (M)[13]						Mascot
		1886.9		1886.97	0.0647	34	140	155	DSYLILDTLPSEYDSR												Mascot
		1886.9		1886.97	0.0647	34	140	155	DSYLILDTLPSEYDSR			75	100								Mascot
		1948.02		1948.02	0.0028	1	263	279	SPCIIFIDEIDAIGTKR						Carbamidomethyl (C)[3]						Mascot
		1967.94		1968.01	0.0687	35	293	309	TMLELLNQLDGFSSDER												Mascot
		1967.94		1968.01	0.0687	35	293	309	TMLELLNQLDGFSSDER			31	93.423								Mascot
		1983.93		1984	0.0634	32	293	309	TMLELLNQLDGFSSDER						Oxidation (M)[2]						Mascot
		1983.93		1984	0.0634	32	293	309	TMLELLNQLDGFSSDER			17	0		Oxidation (M)[2]						Mascot
		2049.06		2049.09	0.0371	18	261	278	EKSPCIIFIDEIDAIGTK						Carbamidomethyl (C)[5]						Mascot
		2225.11		2225.19	0.0808	36	293	311	TMLELLNQLDGFSSDERI						Oxidation (M)[2]						Mascot
									K
		2253.02		2253.11	0.0823	37	158	177	AMEVDEKPTEDYNDIGG												Mascot
									LEK
		2257.07		2257.14	0.0662	29	395	414	DATEVNHEDFNEGIIQVQ												Mascot
									AK
		2257.07		2257.14	0.0662	29	395	414	DATEVNHEDFNEGIIQVQ												Mascot
									AK
		2761.59		2761.64	0.052	19	114	139	QTIFLPVVGLVDPDKLKP												Mascot
									GDLVGVNK
	2	PREDICTED: 26S protease regulatory subunit 6A										XP_011648845.1			38614.9	5.16		21	230	100	105	100
		homolog isoform X2 [Cucumis sativus]
		Peptide Information
		Calc. Mass		Obsrv. Mass	± da	± ppm	Start	End	Sequence			Ion	C. I. %		Modification					Rank	Result Type
							Seq.	Seq.				Score
		1114.59		1114.64	0.0471	42	243	252	ADILDPALMR												Mascot
		1130.59		1130.63	0.0466	41	243	252	ADILDPALMR						Oxidation (M)[9]						Mascot
		1139.68		1139.59	-0.0881	-77	53	63	LKPGDLVGVNK												Mascot
		1158.65		1158.69	0.0386	33	130	141	GVLLYGPPGTGK												Mascot
		1167.54		1167.58	0.045	39	203	212	RFDSEVSGDR												Mascot
		1195.56		1195.62	0.0573	48	295	305	STDDFNGAQLK												Mascot
		1289.67		1289.72	0.0523	41	306	317	AVCVEAGMLALR						Carbamidomethyl (C)[3]						Mascot
		1305.67		1305.72	0.0507	39	306	317	AVCVEAGMLALR						Carbamidomethyl (C)[3], Oxidation (M)[8]						Mascot
Project 1\Sample project20170120\R17064-4																				of	2	184
		1325.65		1325.7	0.0506	38	260	270	IEFPHPTEEAR												Mascot
		1453.74		1453.8	0.0571	39	259	270	KIEFPHPTEEAR												Mascot
		1453.74		1453.8	0.0571	39	259	270	KIEFPHPTEEAR												Mascot
		1640.93		1640.97	0.0468	29	38	52	QTIFLPVVGLVDPDK												Mascot
		1644.88		1644.93	0.0548	33	159	174	LAGPQLVQMFIGDGAK												Mascot
		1660.87		1660.91	0.0422	25	159	174	LAGPQLVQMFIGDGAK						Oxidation (M)[9]						Mascot
		1670.8		1670.86	0.0629	38	281	294	MNVHPDVNFEELAR												Mascot
		1686.79		1686.86	0.067	40	281	294	MNVHPDVNFEELAR						Oxidation (M)[1]						Mascot
		1791.92		1791.97	0.0496	28	187	202	SPCIIFIDEIDAIGTK						Carbamidomethyl (C)[3]						Mascot
		1798.89		1798.95	0.0645	36	280	294	KMNVHPDVNFEELAR												Mascot
		1814.89		1814.94	0.0583	32	280	294	KMNVHPDVNFEELAR						Oxidation (M)[2]						Mascot
		1886.9		1886.97	0.0647	34	64	79	DSYLILDTLPSEYDSR												Mascot
		1886.9		1886.97	0.0647	34	64	79	DSYLILDTLPSEYDSR			75	100								Mascot
		1948.02		1948.02	0.0028	1	187	203	SPCIIFIDEIDAIGTKR						Carbamidomethyl (C)[3]						Mascot
		1967.94		1968.01	0.0687	35	217	233	TMLELLNQLDGFSSDER												Mascot
		1967.94		1968.01	0.0687	35	217	233	TMLELLNQLDGFSSDER			31	93.423								Mascot
		1983.93		1984	0.0634	32	217	233	TMLELLNQLDGFSSDER						Oxidation (M)[2]						Mascot
		1983.93		1984	0.0634	32	217	233	TMLELLNQLDGFSSDER			17	0		Oxidation (M)[2]						Mascot
		2049.06		2049.09	0.0371	18	185	202	EKSPCIIFIDEIDAIGTK						Carbamidomethyl (C)[5]						Mascot
		2225.11		2225.19	0.0808	36	217	235	TMLELLNQLDGFSSDERI						Oxidation (M)[2]						Mascot
									K
		2253.02		2253.11	0.0823	37	82	101	AMEVDEKPTEDYNDIGG												Mascot
									LEK
		2257.07		2257.14	0.0662	29	319	338	DATEVNHEDFNEGIIQVQ												Mascot
									AK
		2257.07		2257.14	0.0662	29	319	338	DATEVNHEDFNEGIIQVQ												Mascot
									AK
		2761.59		2761.64	0.052	19	38	63	QTIFLPVVGLVDPDKLKP												Mascot
									GDLVGVNK
	3	hypothetical protein Csa_2G031700 [Cucumis sativus]										KGN60962.1			47400.4	4.99		22	227	100	105	100
		Protein Group
		PREDICTED: 26S protease regulatory subunit 6A										XP_004144776.1			47400.4		4.9899
		homolog isoform X1 [Cucumis sativus]															997711
																	1816
		Peptide Information
		Calc. Mass		Obsrv. Mass	± da	± ppm	Start	End	Sequence			Ion	C. I. %		Modification					Rank	Result Type
							Seq.	Seq.				Score
		872.484		872.524	0.0403	46	30	36	LLDNEIR												Mascot
		1114.59		1114.64	0.0471	42	319	328	ADILDPALMR												Mascot
		1130.59		1130.63	0.0466	41	319	328	ADILDPALMR						Oxidation (M)[9]						Mascot
		1139.68		1139.59	-0.0881	-77	129	139	LKPGDLVGVNK												Mascot
Project 1\Sample project20170120\R17064-4				1139.59																of	3	Mascot	184
		1158.65		1158.69	0.0386	33	206	217	GVLLYGPPGTGK												Mascot
		1167.54		1167.58	0.045	39	279	288	RFDSEVSGDR												Mascot
		1195.56		1195.62	0.0573	48	371	381	STDDFNGAQLK												Mascot
		1289.67		1289.72	0.0523	41	382	393	AVCVEAGMLALR						Carbamidomethyl (C)[3]						Mascot
		1305.67		1305.72	0.0507	39	382	393	AVCVEAGMLALR						Carbamidomethyl (C)[3], Oxidation (M)[8]						Mascot
		1325.65		1325.7	0.0506	38	336	346	IEFPHPTEEAR												Mascot
		1453.74		1453.8	0.0571	39	335	346	KIEFPHPTEEAR												Mascot
		1453.74		1453.8	0.0571	39	335	346	KIEFPHPTEEAR												Mascot
		1640.93		1640.97	0.0468	29	114	128	QTIFLPVVGLVDPDK												Mascot
		1644.88		1644.93	0.0548	33	235	250	LAGPQLVQMFIGDGAK												Mascot
		1660.87		1660.91	0.0422	25	235	250	LAGPQLVQMFIGDGAK						Oxidation (M)[9]						Mascot
		1670.8		1670.86	0.0629	38	357	370	MNVHPDVNFEELAR												Mascot
		1686.79		1686.86	0.067	40	357	370	MNVHPDVNFEELAR						Oxidation (M)[1]						Mascot
		1791.92		1791.97	0.0496	28	263	278	SPCIIFIDEIDAIGTK						Carbamidomethyl (C)[3]						Mascot
		1798.89		1798.95	0.0645	36	356	370	KMNVHPDVNFEELAR												Mascot
		1814.89		1814.94	0.0583	32	356	370	KMNVHPDVNFEELAR						Oxidation (M)[2]						Mascot
		1886.9		1886.97	0.0647	34	140	155	DSYLILDTLPSEYDSR												Mascot
		1886.9		1886.97	0.0647	34	140	155	DSYLILDTLPSEYDSR			75	100								Mascot
		1948.02		1948.02	0.0028	1	263	279	SPCIIFIDEIDAIGTKR						Carbamidomethyl (C)[3]						Mascot
		1967.94		1968.01	0.0687	35	293	309	TMLELLNQLDGFSSDER												Mascot
		1967.94		1968.01	0.0687	35	293	309	TMLELLNQLDGFSSDER			31	93.423								Mascot
		1983.93		1984	0.0634	32	293	309	TMLELLNQLDGFSSDER						Oxidation (M)[2]						Mascot
		1983.93		1984	0.0634	32	293	309	TMLELLNQLDGFSSDER			17	0		Oxidation (M)[2]						Mascot
		2049.06		2049.09	0.0371	18	261	278	EKSPCIIFIDEIDAIGTK						Carbamidomethyl (C)[5]						Mascot
		2225.11		2225.19	0.0808	36	293	311	TMLELLNQLDGFSSDERI						Oxidation (M)[2]						Mascot
									K
		2253.02		2253.11	0.0823	37	158	177	AMEVDEKPTEDYNDIGG												Mascot
									LEK
		2257.07		2257.14	0.0662	29	395	414	DATEVNHEDFNEGIIQVQ												Mascot
									AK
		2257.07		2257.14	0.0662	29	395	414	DATEVNHEDFNEGIIQVQ												Mascot
									AK
		2761.59		2761.64	0.052	19	114	139	QTIFLPVVGLVDPDKLKP												Mascot
									GDLVGVNK
	4	hypothetical protein Csa_1G707660 [Cucumis sativus]										KGN66901.1			77874.9	4.87		12	40	0	11	0
		Peptide Information
		Calc. Mass		Obsrv. Mass	± da	± ppm	Start	End	Sequence			Ion	C. I. %		Modification					Rank	Result Type
							Seq.	Seq.				Score
		1129.61		1129.64	0.0304	27	527	535	RHLQVSFDK												Mascot
Project 1\Sample project20170120\R17064-4																				of	4	184
		1139.52		1139.59	0.0687	60	119	128	SYDPQDSLSK												Mascot
		1438.67		1438.73	0.0652	45	46	58	DAVENLCGNMKTK						Oxidation (M)[10]						Mascot
		1661		1660.91	-0.0819	-49	668	682	QIHQIASAIIARAIR												Mascot
		1684.78		1684.88	0.0991	59	273	287	ESASIFGDDPIYTNR												Mascot
		1886.97		1886.97	-0.0014	-1	134	149	NMAFLENIDILLAEHK						Oxidation (M)[2]						Mascot
		1886.97		1886.97	-0.0014	-1	134	149	NMAFLENIDILLAEHK			11	0		Oxidation (M)[2]						Mascot
		1947.94		1948.02	0.0814	42	538	552	DHFCLQYVLSFIYSR						Carbamidomethyl (C)[4]						Mascot
		2038.03		2037.99	-0.0398	-20	163	181	NSPELKATGEVSSEVSLY												Mascot
									K
		2599.33		2599.28	-0.0572	-22	189	210	AMLEEQLIEISEQPFVDPL												Mascot
									ELR
		2748.39		2748.4	0.0095	3	59	81	YLAFLRISEEAVEMEHEL												Mascot
									AELQK
		2761.44		2761.64	0.2007	73	318	342	AASICIHASLNFCSLLETQ						Carbamidomethyl (C)[5,13]						Mascot
									GLKLSK
		3327.64		3327.68	0.0349	10	134	162	NMAFLENIDILLAEHKTEE												Mascot
									ALEALDAEER
		3343.64		3343.67	0.034	10	134	162	NMAFLENIDILLAEHKTEE						Oxidation (M)[2]						Mascot
									ALEALDAEER
	5	PREDICTED: DNA gyrase subunit A,										XP_004146774.1			101751	8.55		17	39	0
		chloroplastic/mitochondrial [Cucumis sativus]
		Peptide Information
		Calc. Mass		Obsrv. Mass	± da	± ppm	Start	End	Sequence			Ion	C. I. %		Modification					Rank	Result Type
							Seq.	Seq.				Score
		870.577		870.579	0.0018	2	386	392	IVIELKR												Mascot
		1022.59		1022.55	-0.0382	-37	453	460	LLHAQERR												Mascot
		1130.64		1130.63	-0.0011	-1	147	157	CARVVGEVLGK												Mascot
		1325.74		1325.7	-0.0368	-28	893	904	GVILMRLDHAGK						Oxidation (M)[5]						Mascot
		1567.85		1567.8	-0.0508	-32	29	42	TCLGLSELRFLSTK												Mascot
		1602.83		1602.83	-0.0008	0	392	405	RGADPSIVQNNLYR												Mascot
		1640.82		1640.97	0.1528	93	523	536	FIDESKSLMENISK												Mascot
		1813.97		1813.97	0.0046	3	663	680	TAAGTPLVQVLSLSDGER												Mascot
		1864.97		1865.06	0.0938	50	529	544	SLMENISKLEELLSSR						Oxidation (M)[3]						Mascot
		1924.99		1924.97	-0.0204	-11	432	447	ELLQAFLDFRCSVVER												Mascot
		1947.93		1948.02	0.0934	48	782	798	MASMDIIPAAVWNDLER						Oxidation (M)[1]						Mascot
		1963.93		1963.98	0.0503	26	782	798	MASMDIIPAAVWNDLER						Oxidation (M)[1,4]						Mascot
		1982.02		1982.02	-0.0008	0	432	447	ELLQAFLDFRCSVVER						Carbamidomethyl (C)[11]						Mascot
		1990.09		1989.98	-0.1134	-57	129	145	ILFAMHELGLSSRKPFK						Oxidation (M)[5]						Mascot
		2189.16		2189.22	0.0649	30	495	513	TQFNLSEKQAEAVLDINL												Mascot
									R
		2297.13		2297.21	0.0793	35	406	426	LTSLQSSFSCNMVGIING						Carbamidomethyl (C)[10], Oxidation (M)[12]						Mascot
									QPK
		2691.27		2691.38	0.1116	41	158	180	FHPHGDNAVYDSLVRMA						Oxidation (M)[16]						Mascot
Project 1\Sample project20170120\R17064-4				2691.38																of	5	Mascot	184
									QDFSLR
		2761.42		2761.64	0.2217	80	89	113	IVHTALHKEATDAYMAYA												Mascot
									MSVLLGR
		2823.46		2823.39	-0.0671	-24	406	431	LTSLQSSFSCNMVGIING						Carbamidomethyl (C)[10]						Mascot
									QPKLMGLK
	6	hypothetical protein Csa_1G328390 [Cucumis sativus]										KGN65327.1			15079.9	8.71		7	39	0
		Peptide Information
		Calc. Mass		Obsrv. Mass	± da	± ppm	Start	End	Sequence			Ion	C. I. %		Modification					Rank	Result Type
							Seq.	Seq.				Score
		1325.68		1325.7	0.0182	14	2	13	SHVLATENEGLR												Mascot
		1447.78		1447.85	0.0672	46	113	125	ITTKMEALDNLAK												Mascot
		1453.78		1453.8	0.0247	17	2	14	SHVLATENEGLRK												Mascot
		1453.78		1453.8	0.0247	17	2	14	SHVLATENEGLRK												Mascot
		1644.87		1644.93	0.0588	36	46	59	DMNSLNIEAIQIRK												Mascot
		1660.87		1660.91	0.0463	28	46	59	DMNSLNIEAIQIRK						Oxidation (M)[2]						Mascot
		1828.92		1828.95	0.0307	17	64	79	LLRDIATMHSEAEAQK						Oxidation (M)[8]						Mascot
		1901.92		1901.99	0.0741	39	67	83	DIATMHSEAEAQKVCIR												Mascot
		2247.13		2247.18	0.0493	22	40	58	QSELEKDMNSLNIEAIQIR						Oxidation (M)[8]						Mascot
	7	hypothetical protein Csa_2G416195 [Cucumis sativus]										KGN63229.1			16854.8	8.75		7	37	0
		Peptide Information
		Calc. Mass		Obsrv. Mass	± da	± ppm	Start	End	Sequence			Ion	C. I. %		Modification					Rank	Result Type
							Seq.	Seq.				Score
		951.443		951.407	-0.0365	-38	7	13	AYWNNQR												Mascot
		1325.62		1325.7	0.0822	62	7	16	AYWNNQRMAR						Oxidation (M)[8]						Mascot
		1453.79		1453.8	0.0068	5	34	46	FLGLSEALFEVTK												Mascot
		1453.79		1453.8	0.0068	5	34	46	FLGLSEALFEVTK												Mascot
		1581.89		1581.86	-0.0279	-18	34	47	FLGLSEALFEVTKK												Mascot
		1623.78		1623.94	0.1595	98	1	13	MGQSIRAYWNNQR												Mascot
		1689.87		1689.88	0.0085	5	19	33	TMCPYFFGVVGIVLK						Oxidation (M)[2]						Mascot
		1940.11		1939.98	-0.1271	-66	133	149	SSILTLLFVYLSQKTNI												Mascot
	8	PREDICTED: LOW QUALITY PROTEIN: exocyst										XP_004145457.2			86788.8	4.6		12	36	0	11	0
		complex component EXO84C [Cucumis sativus]
		Peptide Information
		Calc. Mass		Obsrv. Mass	± da	± ppm	Start	End	Sequence			Ion	C. I. %		Modification					Rank	Result Type
							Seq.	Seq.				Score
		1129.61		1129.64	0.0304	27	527	535	RHLQVSFDK												Mascot
		1139.52		1139.59	0.0687	60	119	128	SYDPQDSLSK												Mascot
Project 1\Sample project20170120\R17064-4				1139.59																of	6	Mascot	184
		1438.67		1438.73	0.0652	45	46	58	DAVENLCGNMKTK						Oxidation (M)[10]						Mascot
		1661		1660.91	-0.0819	-49	668	682	QIHQIASAIIARAIR												Mascot
		1684.78		1684.88	0.0991	59	273	287	ESASIFGDDPIYTNR												Mascot
		1886.97		1886.97	-0.0014	-1	134	149	NMAFLENIDILLAEHK						Oxidation (M)[2]						Mascot
		1886.97		1886.97	-0.0014	-1	134	149	NMAFLENIDILLAEHK			11	0		Oxidation (M)[2]						Mascot
		1947.94		1948.02	0.0814	42	538	552	DHFCLQYVLSFIYSR						Carbamidomethyl (C)[4]						Mascot
		2038.03		2037.99	-0.0398	-20	163	181	NSPELKATGEVSSEVSLY												Mascot
									K
		2599.33		2599.28	-0.0572	-22	189	210	AMLEEQLIEISEQPFVDPL												Mascot
									ELR
		2748.39		2748.4	0.0095	3	59	81	YLAFLRISEEAVEMEHEL												Mascot
									AELQK
		2761.44		2761.64	0.2007	73	318	342	AASICIHASLNFCSLLETQ						Carbamidomethyl (C)[5,13]						Mascot
									GLKLSK
		3327.64		3327.68	0.0349	10	134	162	NMAFLENIDILLAEHKTEE												Mascot
									ALEALDAEER
		3343.64		3343.67	0.034	10	134	162	NMAFLENIDILLAEHKTEE						Oxidation (M)[2]						Mascot
									ALEALDAEER
	9	hypothetical protein Csa_5G410720 [Cucumis sativus]										KGN51031.1			21121.8	9.99		7	35	0
		Protein Group
		PREDICTED: uncharacterized protein LOC105435673										XP_011656214.1			21121.8		9.9899
		[Cucumis sativus]															997711
																	1816
		Peptide Information
		Calc. Mass		Obsrv. Mass	± da	± ppm	Start	End	Sequence			Ion	C. I. %		Modification					Rank	Result Type
							Seq.	Seq.				Score
		1022.54		1022.55	0.0094	9	68	75	YRLEATNR												Mascot
		1129.61		1129.64	0.0317	28	76	85	SDPTILIQDK												Mascot
		1813.97		1813.97	0.0046	3	70	85	LEATNRSDPTILIQDK												Mascot
		1847.91		1848.04	0.1289	70	16	33	NPTPTEPTAAHDDLAAVK												Mascot
		2010.01		2010.03	0.0204	10	157	174	KPSLMCGKMEDVVLATQ						Oxidation (M)[5,9]						Mascot
									K
		2014.97		2015.03	0.0629	31	119	135	NNFSLRSFESEIMDLGR												Mascot
		2599.35		2599.28	-0.0723	-28	86	108	LQTPTPHTNSLLDSYEIA												Mascot
									SISRR
	10	hypothetical protein Csa_3G252480 [Cucumis sativus]										KGN57689.1			23277	9.31		8	34	0
		Peptide Information
		Calc. Mass		Obsrv. Mass	± da	± ppm	Start	End	Sequence			Ion	C. I. %		Modification					Rank	Result Type
							Seq.	Seq.				Score
		1139.49		1139.59	0.1003	88	64	73	VSGDGNCQFR						Carbamidomethyl (C)[7]						Mascot
		1289.73		1289.72	-0.0096	-7	21	32	LSNLAPIAHTPR												Mascot
		1594.77		1594.91	0.143	90	99	111	DHRSLYEGYVPMK												Mascot
Project 1\Sample project20170120\R17064-4																				of	7	184
		1684.79		1684.88	0.0879	52	122	137	SGEWGDHVTLQAAADK												Mascot
		1724.81		1724.83	0.0282	16	74	87	ALSDQMYRSPEYHK												Mascot
		1918.97		1919.01	0.0416	22	150	165	DTCFIEIVPQSQTPKR						Carbamidomethyl (C)[3]						Mascot
		2014.97		2015.03	0.0629	31	119	137	MAKSGEWGDHVTLQAA												Mascot
									ADK
		2599.3		2599.28	-0.023	-9	165	184	RELWLSFWSEVHYNSLY												Mascot
									EIK
Project 1\Sample project20170120\R17064-4																				of	8	184
Gel Idx/Pos			271/K23						Instr./Gel Origin		BA2151/Sample Project 20170120						Process Status			Analysis Succeeded
Plate [#] Name			[1] Sample Project 20170120						Instrument Sample Name								Spectra			11
Rank		Protein Name						Species				Accession No.			Protein MW		Protein	Pep.	Protein	Protein	Total Ion	Total Ion
																	PI	Count	Score	Score	Score	C. I. %
																				C. I. %
	1	Oxygen-evolving enhancer protein 1 [Cucumis sativus]										KGN48464.1			34938.8	6.24		20	752	100	621	100
		Protein Group
		PREDICTED: oxygen-evolving enhancer protein 1,										XP_004141946.1			34938.8		6.2399
		chloroplastic [Cucumis sativus]															997711
																	1816
		Peptide Information
		Calc. Mass		Obsrv. Mass	± da	± ppm	Start	End	Sequence			Ion	C. I. %		Modification					Rank	Result Type
							Seq.	Seq.				Score
		964.587		964.614	0.0278	29	208	215	VPFLFTIK												Mascot
		1080.56		1080.59	0.0328	30	91	99	LTFDEIQSK												Mascot
		1145.56		1145.59	0.0306	27	152	161	NAPPEFQNTK												Mascot
		1236.66		1236.7	0.0386	31	90	99	RLTFDEIQSK												Mascot
		1236.66		1236.7	0.0386	31	90	99	RLTFDEIQSK			5	0								Mascot
		1279.63		1279.64	0.0107	8	322	332	IQGVWYAQLDS												Mascot
		1328.66		1328.69	0.0381	29	135	145	FCLEPTSFTVK						Carbamidomethyl (C)[2]						Mascot
		1374.67		1374.72	0.0414	30	264	275	GDEEELAKENIK												Mascot
		1456.75		1456.79	0.038	26	134	145	KFCLEPTSFTVK						Carbamidomethyl (C)[3]						Mascot
		1544.81		1544.78	-0.0265	-17	2	17	AASVQAAAATLMQPSK												Mascot
		1562.76		1562.8	0.0463	30	247	263	GGSTGYDNAVALPAGGR												Mascot
		1562.76		1562.8	0.0463	30	247	263	GGSTGYDNAVALPAGGR			107	100								Mascot
		1760.88		1760.93	0.0467	27	191	207	DGIDYAAVTVQLPGGER												Mascot
		1760.88		1760.93	0.0467	27	191	207	DGIDYAAVTVQLPGGER			135	100								Mascot
		1775.88		1775.94	0.0569	32	245	263	GRGGSTGYDNAVALPAG												Mascot
									GR
		2142.98		2143.02	0.0481	22	106	126	GTGTANQCPTIDGGVDS						Carbamidomethyl (C)[8]						Mascot
									FAFK
		2142.98		2143.02	0.0481	22	106	126	GTGTANQCPTIDGGVDS			97	100		Carbamidomethyl (C)[8]						Mascot
									FAFK
		2254.11		2254.16	0.0501	22	166	186	LTYTLDEIEGPFEVGADG												Mascot
									SIK
		2254.11		2254.16	0.0501	22	166	186	LTYTLDEIEGPFEVGADG			34	94.791								Mascot
									SIK
		2284.16		2284.22	0.0613	27	216	236	QLVASGKPESFSGDFLV												Mascot
									PSYR
		2284.16		2284.22	0.0613	27	216	236	QLVASGKPESFSGDFLV			144	100								Mascot
									PSYR
		2294.13		2294.18	0.0532	23	187	207	FEEKDGIDYAAVTVQLPG												Mascot
									GER
Project 1\Sample project20170120\R17064-4																				of	9	184
		2434.15		2434.22	0.0686	28	247	271	GGSTGYDNAVALPAGGR												Mascot
									GDEEELAK
		2434.15		2434.22	0.0686	28	247	271	GGSTGYDNAVALPAGGR												Mascot
									GDEEELAK
		2604.3		2604.36	0.059	23	291	315	SKPETGEVIGVFESIQPS												Mascot
									DTDLGAK
		2604.3		2604.36	0.059	23	291	315	SKPETGEVIGVFESIQPS			99	100								Mascot
									DTDLGAK
		2706.45		2706.52	0.0691	26	191	215	DGIDYAAVTVQLPGGER												Mascot
									VPFLFTIK
		2787.36		2787.43	0.0676	24	166	190	LTYTLDEIEGPFEVGADG												Mascot
									SIKFEEK
	2	hypothetical protein Csa_7G432420 [Cucumis sativus]										KGN45260.1			35609.6	9.06		11	47	0
		Protein Group
		PREDICTED: uncharacterized protein LOC101207808										XP_004135852.1			35609.6		9.06
		[Cucumis sativus]															4196
																	167
		Peptide Information
		Calc. Mass		Obsrv. Mass	± da	± ppm	Start	End	Sequence			Ion	C. I. %		Modification					Rank	Result Type
							Seq.	Seq.				Score
		1258.7		1258.67	-0.0262	-21	188	199	NVGDLLNVSISK												Mascot
		1287.65		1287.68	0.0323	25	300	310	QTDKSISLHCR												Mascot
		1391.73		1391.71	-0.0136	-10	26	36	MGKICHLYLTR						Carbamidomethyl (C)[5]						Mascot
		1600.84		1600.81	-0.0361	-23	250	264	GDAQSVQVSVKHFAK												Mascot
		1643.88		1643.84	-0.035	-21	136	150	SAVIQDVPISKPMSR						Oxidation (M)[13]						Mascot
		1782.81		1782.9	0.0961	54	91	107	SSVSICSEFGNGPTANR						Carbamidomethyl (C)[6]						Mascot
		1943.87		1944	0.131	67	60	75	EALFDDYRISSQNDDR												Mascot
		1943.87		1944	0.131	67	60	75	EALFDDYRISSQNDDR												Mascot
		2165.11		2165.02	-0.0979	-45	115	132	KLPLNCTQPMPFLTFETK						Carbamidomethyl (C)[6]						Mascot
		2265.13		2265.18	0.0541	24	91	111	SSVSICSEFGNGPTANRL						Carbamidomethyl (C)[6]						Mascot
									QIK
		2300.2		2300.19	-0.0074	-3	68	87	ISSQNDDRIAFTVDISLLH												Mascot
									R
		2328.18		2328.18	0.0063	3	116	135	LPLNCTQPMPFLTFETKG												Mascot
									YK
	3	hypothetical protein Csa_1G302180 [Cucumis sativus]										KGN65291.1			47084.7	8.7		13	44	0
		Protein Group
		PREDICTED: 26S protease regulatory subunit 8										XP_004149888.1			47084.7		8.6999
		homolog A [Cucumis sativus]															998092
																	6514
		Peptide Information
		Calc. Mass		Obsrv. Mass	± da	± ppm	Start	End	Sequence			Ion	C. I. %		Modification					Rank	Result Type
							Seq.	Seq.				Score
		881.455		881.533	0.0785	89	244	250	ELFVMAR						Oxidation (M)[5]						Mascot
Project 1\Sample project20170120\R17064-4																				of	10	184
		1128.65		1128.56	-0.0887	-79	338	346	FDILKIHSR												Mascot
		1167.59		1167.58	-0.0139	-12	234	243	YIGEGSRMVR												Mascot
		1301.68		1301.65	-0.0313	-24	56	66	LEAQRNELNSK												Mascot
		1479.86		1479.82	-0.0469	-32	310	322	IDILDQALLRPGR												Mascot
		1775.87		1775.94	0.0608	34	387	401	RVHVTQEDFEMAVAK						Oxidation (M)[11]						Mascot
		2236.12		2236.16	0.0461	21	151	170	VEKVPDSTYDMIGGLDQ												Mascot
									QIK
		2248.17		2248.17	-0.0031	-1	33	49	QYYLQHIHEHQLQVRQK												Mascot
		2265.29		2265.18	-0.1026	-45	303	322	VLMATNRIDILDQALLRP												Mascot
									GR
		2266.13		2266.22	0.0894	39	154	173	VPDSTYDMIGGLDQQIKE						Oxidation (M)[8]						Mascot
									IK
		2284.09		2284.22	0.1338	59	363	384	MNGASGAELKAVCTEAG						Carbamidomethyl (C)[13]						Mascot
									MFALR
		2284.09		2284.22	0.1338	59	363	384	MNGASGAELKAVCTEAG						Carbamidomethyl (C)[13]						Mascot
									MFALR
		2298.17		2298.2	0.03	13	213	233	AVAHHTDCTFIRVSGSEL												Mascot
									VQK
		2300.08		2300.19	0.1088	47	363	384	MNGASGAELKAVCTEAG						Carbamidomethyl (C)[13], Oxidation (M)[1]						Mascot
									MFALR
		2328.05		2328.18	0.1316	57	1	22	MAIMEVETQQAASASLD						Carbamidomethyl (C)[19], Oxidation (M)[1]						Mascot
									ACSAK
	4	hypothetical protein Csa_2G348960 [Cucumis sativus]										KGN62310.1			55160.7	9.1		13	42	0
		Peptide Information
		Calc. Mass		Obsrv. Mass	± da	± ppm	Start	End	Sequence			Ion	C. I. %		Modification					Rank	Result Type
							Seq.	Seq.				Score
		1465.81		1465.88	0.0636	43	457	469	ASNILLDQKHQAK												Mascot
		1471.68		1471.81	0.1349	92	229	241	SEARALNTGCFMR						Oxidation (M)[12]						Mascot
		1714.79		1714.91	0.12	70	209	224	SSCSTCLQIASASMLR						Carbamidomethyl (C)[3]						Mascot
		1798.91		1798.9	-0.006	-3	335	352	IGQGGFGSVYKGTLSDG												Mascot
									R
		1914.93		1915.04	0.1028	54	161	178	QAAKEAVMQVVDGAPDN						Oxidation (M)[8]						Mascot
									R
		1919.93		1920.04	0.1095	57	165	182	EAVMQVVDGAPDNRGFA						Oxidation (M)[4]						Mascot
									K
		1969.9		1970.08	0.1842	94	367	383	AADFYNEVNMISSVEHK						Oxidation (M)[10]						Mascot
		2143.01		2143.02	0.0115	5	209	228	SSCSTCLQIASASMLRCL						Oxidation (M)[14]						Mascot
									PR
		2143.01		2143.02	0.0115	5	209	228	SSCSTCLQIASASMLRCL						Oxidation (M)[14]						Mascot
									PR
		2156.97		2157.04	0.0752	35	185	204	MAVAGMANESAAYALGQ						Carbamidomethyl (C)[18]						Mascot
									CWR
		2298.08		2298.2	0.1137	49	209	228	SSCSTCLQIASASMLRCL						Carbamidomethyl (C)[3,6,17]						Mascot
									PR
		2416.1		2416.22	0.1215	50	183	204	ARMAVAGMANESAAYAL						Carbamidomethyl (C)[20], Oxidation (M)[3,8]						Mascot
									GQCWR
		2586.2		2586.34	0.135	52	185	208	MAVAGMANESAAYALGQ						Oxidation (M)[1]						Mascot
									CWRSLNR
		2604.23		2604.36	0.132	51	109	130	TMLPQCFPFNGGRAFID						Carbamidomethyl (C)[6,19]						Mascot
									GCFLR
Project 1\Sample project20170120\R17064-4																				of	11	184
		2604.23		2604.36	0.132	51	109	130	TMLPQCFPFNGGRAFID						Carbamidomethyl (C)[6,19]						Mascot
									GCFLR
		2787.31		2787.43	0.1169	42	40	63	VICGKELEHNTTAYVPNF						Carbamidomethyl (C)[3], Oxidation (M)[22]						Mascot
									FGSMEK
	5	hypothetical protein Csa_5G139540 [Cucumis sativus]										KGN49876.1			21881.3	6.44		8	42	0
		Protein Group
		PREDICTED: abscisic acid receptor PYL8-like										XP_011654623.1			21881.3		6.44
		[Cucumis sativus]															572
																	2046
		Peptide Information
		Calc. Mass		Obsrv. Mass	± da	± ppm	Start	End	Sequence			Ion	C. I. %		Modification					Rank	Result Type
							Seq.	Seq.				Score
		1236.75		1236.7	-0.0494	-40	47	57	APVPLVWSLVR												Mascot
		1236.75		1236.7	-0.0494	-40	47	57	APVPLVWSLVR												Mascot
		1391.69		1391.71	0.0202	15	171	182	CNLKSLADVSER						Carbamidomethyl (C)[1]						Mascot
		1487.71		1487.81	0.1012	68	159	170	DETCYFVEALIK						Carbamidomethyl (C)[4]						Mascot
		1645.8		1645.89	0.0914	56	30	43	NEPAENQCTSRLVK						Carbamidomethyl (C)[8]						Mascot
		1699.83		1699.89	0.0622	37	101	114	LELLDDDNHILSMR						Oxidation (M)[13]						Mascot
		2434.21		2434.22	0.0024	1	101	121	LELLDDDNHILSMRIVGG						Oxidation (M)[13]						Mascot
									DHR
		2434.21		2434.22	0.0024	1	101	121	LELLDDDNHILSMRIVGG						Oxidation (M)[13]						Mascot
									DHR
		2586.24		2586.34	0.0954	37	2	26	NGNSTGNGNGNVGGLS												Mascot
									NAEWELIRR
		2800.38		2800.5	0.1181	42	90	114	SGLPATTSTERLELLDDD						Oxidation (M)[24]						Mascot
									NHILSMR
	6	hypothetical protein Csa_7G071390 [Cucumis sativus]										KGN43850.1			88756.7	5.67		16	42	0
		Protein Group
		PREDICTED: RINT1-like protein MAG2 isoform X1										XP_004137086.1			88756.7		5.67
		[Cucumis sativus]															762
																	9395
		Peptide Information
		Calc. Mass		Obsrv. Mass	± da	± ppm	Start	End	Sequence			Ion	C. I. %		Modification					Rank	Result Type
							Seq.	Seq.				Score
		1360.74		1360.76	0.0252	19	509	520	CQSLPSITLRSR												Mascot
		1391.69		1391.71	0.0236	17	65	76	HTLLSQSTFSDR												Mascot
		1544.9		1544.78	-0.1184	-77	204	217	ALAILRPQAIADHR												Mascot
		1562.87		1562.8	-0.0628	-40	619	632	ISTVILRGFDAQSR												Mascot
		1562.87		1562.8	-0.0628	-40	619	632	ISTVILRGFDAQSR												Mascot
		1567.74		1567.8	0.0554	35	241	254	STESQNPLFTMQGK												Mascot
		1719.9		1719.89	-0.0148	-9	62	76	SLKHTLLSQSTFSDR												Mascot
		1745.85		1745.92	0.0722	41	463	476	LQIEVDNERNWSDK												Mascot
Project 1\Sample project20170120\R17064-4																				of	12	184
		1760.88		1760.93	0.0432	25	457	471	SDAMLKLQIEVDNER												Mascot
		1760.88		1760.93	0.0432	25	457	471	SDAMLKLQIEVDNER												Mascot
		1915.1		1915.04	-0.0618	-32	201	217	VDRALAILRPQAIADHR												Mascot
		2157.08		2157.04	-0.0371	-17	692	710	FIFNGILMSNVQFNNDGV												Mascot
									K
		2165.14		2165.02	-0.1269	-59	666	683	MLTLEKNLNGIDFVSLWR						Oxidation (M)[1]						Mascot
		2279.1		2279.16	0.0559	25	138	158	LDCMVGDIEDAVSSAINK						Oxidation (M)[4]						Mascot
									NLR
		2300.08		2300.19	0.1123	49	257	274	QQYCENFLALCSLQEIQR						Carbamidomethyl (C)[4,11]						Mascot
		2456.18		2456.22	0.0376	15	257	275	QQYCENFLALCSLQEIQR						Carbamidomethyl (C)[4,11]						Mascot
									R
		2604.37		2604.36	-0.0032	-1	88	113	LMGLESLTRSQSSTQGV												Mascot
									GIADGVLGK
		2604.37		2604.36	-0.0032	-1	88	113	LMGLESLTRSQSSTQGV												Mascot
									GIADGVLGK
		2706.35		2706.52	0.1712	63	374	396	EIFPNYIRQLDEDSNIGIQ												Mascot
									SQAR
	7	PREDICTED: N-alpha-acetyltransferase 15, NatA										XP_011659551.1			103171	6.59		18	40	0
		auxiliary subunit [Cucumis sativus]
		Peptide Information
		Calc. Mass		Obsrv. Mass	± da	± ppm	Start	End	Sequence			Ion	C. I. %		Modification					Rank	Result Type
							Seq.	Seq.				Score
		1080.63		1080.59	-0.0399	-37	15	23	LIVKSYETK												Mascot
		1145.62		1145.59	-0.0309	-27	313	322	IPLDFLQGDK												Mascot
		1236.65		1236.7	0.0499	40	239	248	LEEAENLYKK												Mascot
		1236.65		1236.7	0.0499	40	239	248	LEEAENLYKK												Mascot
		1258.79		1258.67	-0.1142	-91	694	704	QKILLAFQAVK												Mascot
		1279.58		1279.64	0.0616	48	186	195	CEHGEMLLYK						Carbamidomethyl (C)[1]						Mascot
		1301.72		1301.65	-0.0717	-55	312	322	RIPLDFLQGDK												Mascot
		1391.68		1391.71	0.0315	23	196	207	ISLLDECGSLER						Carbamidomethyl (C)[7]						Mascot
		1456.76		1456.79	0.0268	18	819	830	EWTLKECIAVHK												Mascot
		1614.83		1614.82	-0.0132	-8	641	654	RHVKPVDTDPHGEK												Mascot
		1714.9		1714.91	0.0138	8	705	718	QLLRLDVEHPDSHR												Mascot
		1745.77		1745.92	0.1519	87	451	465	CMDLADRYINSDCVK												Mascot
		1886.87		1886.96	0.0932	49	723	739	FFCKVDSMPAPTTDAEK												Mascot
		1919.97		1920.04	0.0625	33	338	355	GVPSLFSDLSPLYDQPG												Mascot
									K
		1943.89		1944	0.1162	60	723	739	FFCKVDSMPAPTTDAEK						Carbamidomethyl (C)[3]						Mascot
		1943.89		1944	0.1162	60	723	739	FFCKVDSMPAPTTDAEK						Carbamidomethyl (C)[3]						Mascot
		1967.89		1967.99	0.1024	52	589	606	SSTGEDDDMSNLLPSQK						Oxidation (M)[9]						Mascot
									K
		2279.06		2279.16	0.0947	42	39	58	FPEHGETLSMKGLTLNC												Mascot
									MDR
Project 1\Sample project20170120\R17064-4																				of	13	184
		2282.17		2282.21	0.0425	19	675	693	HSPDFLDTHVLSFEVNIR												Mascot
									R
		2294.17		2294.18	0.0088	4	773	792	DSLMHRAAVAEMLNLLE												Mascot
									PQR
		2310.17		2310.18	0.0146	6	773	792	DSLMHRAAVAEMLNLLE						Oxidation (M)[4]						Mascot
									PQR
		2604.18		2604.36	0.185	71	259	281	DCIHTSMQTEYEGLQVC						Oxidation (M)[7]						Mascot
									VGLFSK
		2604.18		2604.36	0.185	71	259	281	DCIHTSMQTEYEGLQVC						Oxidation (M)[7]						Mascot
									VGLFSK
	8	hypothetical protein Csa_2G005970 [Cucumis sativus]										KGN60651.1			47192.8	8.5		12	38	0
		Protein Group
		PREDICTED: 26S protease regulatory subunit 8										XP_004139327.1			47192.8		8.5
		homolog A [Cucumis sativus]
		Peptide Information
		Calc. Mass		Obsrv. Mass	± da	± ppm	Start	End	Sequence			Ion	C. I. %		Modification					Rank	Result Type
							Seq.	Seq.				Score
		881.455		881.533	0.0785	89	244	250	ELFVMAR						Oxidation (M)[5]						Mascot
		1128.65		1128.56	-0.0887	-79	338	346	FDILKIHSR												Mascot
		1167.59		1167.58	-0.0139	-12	234	243	YIGEGSRMVR												Mascot
		1479.86		1479.82	-0.0469	-32	310	322	IDILDQALLRPGR												Mascot
		1760.87		1760.93	0.0545	31	10	26	LPEAISEDTCSAKPATK												Mascot
		1760.87		1760.93	0.0545	31	10	26	LPEAISEDTCSAKPATK												Mascot
		1775.87		1775.94	0.0608	34	387	401	RVHVTQEDFEMAVAK						Oxidation (M)[11]						Mascot
		1968.05		1967.99	-0.0564	-29	33	47	HYYLQHIQDLQLQLR												Mascot
		2236.12		2236.16	0.0461	21	151	170	VEKVPDSTYDMIGGLDQ												Mascot
									QIK
		2265.29		2265.18	-0.1026	-45	303	322	VLMATNRIDILDQALLRP												Mascot
									GR
		2266.13		2266.22	0.0894	39	154	173	VPDSTYDMIGGLDQQIKE						Oxidation (M)[8]						Mascot
									IK
		2284.09		2284.22	0.1338	59	363	384	MNGASGAELKAVCTEAG						Carbamidomethyl (C)[13]						Mascot
									MFALR
		2284.09		2284.22	0.1338	59	363	384	MNGASGAELKAVCTEAG						Carbamidomethyl (C)[13]						Mascot
									MFALR
		2298.17		2298.2	0.03	13	213	233	AVAHHTDCTFIRVSGSEL												Mascot
									VQK
		2300.08		2300.19	0.1088	47	363	384	MNGASGAELKAVCTEAG						Carbamidomethyl (C)[13], Oxidation (M)[1]						Mascot
									MFALR
	9	PREDICTED: deoxynucleoside triphosphate										XP_011652275.1			47031.2	6.95		10	38	0	8	0
		triphosphohydrolase SAMHD1 homolog isoform X2
		[Cucumis sativus]
		Protein Group
		PREDICTED: deoxynucleoside triphosphate										XP_011652276.1			47031.2		6.9499
		triphosphohydrolase SAMHD1 homolog isoform X2															998092
		[Cucumis sativus]															6514
		Peptide Information
Project 1\Sample project20170120\R17064-4																				of	14	184
		Calc. Mass		Obsrv. Mass	± da	± ppm	Start	End	Sequence			Ion	C. I. %		Modification					Rank	Result Type
							Seq.	Seq.				Score
		1145.51		1145.59	0.0782	68	337	345	DYESNDKFK												Mascot
		1645.77		1645.89	0.1198	73	270	282	NLYQFCNEYAVPK						Carbamidomethyl (C)[6]						Mascot
		1715.89		1715.92	0.0241	14	309	323	EEDVAVSNVRIDLTR												Mascot
		1760.77		1760.93	0.1614	92	151	165	DCRACGLGCNFLFER						Carbamidomethyl (C)[2]						Mascot
		1760.77		1760.93	0.1614	92	151	165	DCRACGLGCNFLFER			8	0		Carbamidomethyl (C)[5]						Mascot
		1919.97		1920.04	0.0724	38	11	27	FEHSLGVYWLAGDAVQK												Mascot
		2221		2221.14	0.1357	61	154	171	ACGLGCNFLFERLMETM						Carbamidomethyl (C)[2,6], Oxidation (M)[14]						Mascot
									R
		2236.04		2236.16	0.1254	56	87	105	MVDHIVDEHHIDIDSGMIK						Oxidation (M)[1,17]						Mascot
		2266.19		2266.22	0.0267	12	351	369	ISHLLPTSYQDMIVRVYS						Oxidation (M)[12]						Mascot
									K
		2328.09		2328.18	0.0898	39	221	239	ANDYLQLSSYIHDPSQY												Mascot
									WK
		2706.41		2706.52	0.1043	39	48	71	LAGLLHDVGHGPFSHLFE												Mascot
									REFLSK
	10	hypothetical protein Csa_3G556190 [Cucumis sativus]										KGN58143.1			11174.8	8.66		7	37	0
		Peptide Information
		Calc. Mass		Obsrv. Mass	± da	± ppm	Start	End	Sequence			Ion	C. I. %		Modification					Rank	Result Type
							Seq.	Seq.				Score
		1328.62		1328.69	0.0785	59	10	20	VDASIQYTMER						Oxidation (M)[9]						Mascot
		1374.72		1374.72	-0.0037	-3	25	36	VVFQHSQGTLMK												Mascot
		1643.9		1643.84	-0.0615	-37	23	36	IRVVFQHSQGTLMK												Mascot
		1645.74		1645.89	0.1449	88	64	76	YMSWGDREGFEIR												Mascot
		1944.04		1944	-0.0332	-17	25	42	VVFQHSQGTLMKAVAEA												Mascot
									K
		1944.04		1944	-0.0332	-17	25	42	VVFQHSQGTLMKAVAEA												Mascot
									K
		2248.23		2248.17	-0.0561	-25	43	61	ELTIELIAAQPYDIFVWVK												Mascot
		2254.16		2254.16	0.0002	0	77	94	CNEFLLRNCPIFFVNVIR						Carbamidomethyl (C)[1]						Mascot
		2254.16		2254.16	0.0002	0	77	94	CNEFLLRNCPIFFVNVIR						Carbamidomethyl (C)[1]						Mascot
Project 1\Sample project20170120\R17064-4																				of	15	184
Gel Idx/Pos			272/K24						Instr./Gel Origin		BA2151/Sample Project 20170120						Process Status			Analysis Succeeded
Plate [#] Name			[1] Sample Project 20170120						Instrument Sample Name								Spectra			11
Rank		Protein Name						Species				Accession No.			Protein MW		Protein	Pep.	Protein	Protein	Total Ion	Total Ion
																	PI	Count	Score	Score	Score	C. I. %
																				C. I. %
	1	hypothetical protein Csa_6G518380 [Cucumis sativus]										KGN49283.1			45728	5.72		20	236	100	122	100
		Protein Group
		PREDICTED: magnesium-chelatase subunit ChlI,										XP_004134671.1			45728		5.7199
		chloroplastic-like [Cucumis sativus]															997901
																	9165
		Peptide Information
		Calc. Mass		Obsrv. Mass	± da	± ppm	Start	End	Sequence			Ion	C. I. %		Modification					Rank	Result Type
							Seq.	Seq.				Score
		945.54		945.566	0.0256	27	204	212	AFEPGLLAK												Mascot
		1030.56		1030.59	0.028	27	322	330	LQQQISSAR												Mascot
		1044.58		1044.55	-0.0286	-27	360	369	GDIVTNRAAK												Mascot
		1048.53		1048.57	0.0429	41	108	117	IGGVMIMGDR												Mascot
		1064.52		1064.56	0.0324	30	108	117	IGGVMIMGDR						Oxidation (M)[5]						Mascot
		1066.56		1066.59	0.0294	28	248	257	EGISISHPAR												Mascot
		1080.52		1080.55	0.0332	31	108	117	IGGVMIMGDR						Oxidation (M)[5,7]						Mascot
		1154.68		1154.72	0.0377	33	127	136	SLVDLLPEIR												Mascot
		1154.68		1154.72	0.0377	33	127	136	SLVDLLPEIR			40	99.042								Mascot
		1188.6		1188.64	0.0395	33	349	359	VCAELNVDGLR												Mascot
		1202.61		1202.66	0.0483	40	279	289	FGMHAQVGTVR												Mascot
		1218.6		1218.64	0.0378	31	279	289	FGMHAQVGTVR						Oxidation (M)[3]						Mascot
		1245.63		1245.66	0.0394	32	349	359	VCAELNVDGLR						Carbamidomethyl (C)[2]						Mascot
		1245.63		1245.66	0.0394	32	349	359	VCAELNVDGLR						Carbamidomethyl (C)[2]						Mascot
		1297.75		1297.78	0.0284	22	97	107	LCLLLNVIDPK						Carbamidomethyl (C)[2]						Mascot
		1419.73		1419.76	0.0322	23	331	343	SSLSSVQIDQDLK												Mascot
		1543.78		1543.83	0.0476	31	174	187	INMVDLPLGATEDR												Mascot
		1543.78		1543.83	0.0476	31	174	187	INMVDLPLGATEDR			17	0								Mascot
		1559.77		1559.81	0.0362	23	174	187	INMVDLPLGATEDR						Oxidation (M)[3]						Mascot
		1627.88		1627.91	0.0273	17	400	414	DPLESIDSGLLVIEK												Mascot
		1639.85		1639.95	0.1045	64	1	17	MAFALGGSSSTAILASR												Mascot
		1641.86		1641.91	0.0509	31	380	394	VAAEDIATVIPNCLR						Carbamidomethyl (C)[13]						Mascot
		1755.97		1755.99	0.021	12	399	414	KDPLESIDSGLLVIEK												Mascot
		1884.98		1885.03	0.0431	23	378	394	DKVAAEDIATVIPNCLR						Carbamidomethyl (C)[15]						Mascot
Project 1\Sample project20170120\R17064-4																				of	16	184
		2165.07		2165.15	0.0825	38	78	96	ESQRPVYPFAAIVGQDE												Mascot
									MK
		2165.07		2165.15	0.0825	38	78	96	ESQRPVYPFAAIVGQDE												Mascot
									MK
		2181.06		2181.13	0.0642	29	78	96	ESQRPVYPFAAIVGQDE						Oxidation (M)[18]						Mascot
									MK
		2353.25		2353.31	0.0556	24	258	278	FILIGSGNPEEGELRPQLL												Mascot
									DR
		2353.25		2353.31	0.0556	24	258	278	FILIGSGNPEEGELRPQLL			32	93.685								Mascot
									DR
		2452.1		2452.16	0.0647	26	137	158	VVFGDPYNSDPEDPESM												Mascot
									GIEVR
		2468.09		2468.15	0.0539	22	137	158	VVFGDPYNSDPEDPESM						Oxidation (M)[17]						Mascot
									GIEVR
		3540.79		3540.91	0.1248	35	216	247	GILYVDEVNLLDDHLVDV												Mascot
									LLDSAASGWNTVER
		3540.79		3540.91	0.1248	35	216	247	GILYVDEVNLLDDHLVDV			32	94.201								Mascot
									LLDSAASGWNTVER
	2	hypothetical protein Csa_3G682170 [Cucumis sativus]										KGN58555.1			39385.4	5.65		12	62	96.621	13	0
		Peptide Information
		Calc. Mass		Obsrv. Mass	± da	± ppm	Start	End	Sequence			Ion	C. I. %		Modification					Rank	Result Type
							Seq.	Seq.				Score
		935.494		935.534	0.04	43	300	308	TPIAGYASR												Mascot
		1083.6		1083.63	0.0363	33	148	156	TILPCNLPR						Carbamidomethyl (C)[5]						Mascot
		1097.46		1097.52	0.0647	59	309	317	DEDGNCIFK						Carbamidomethyl (C)[6]						Mascot
		1122.56		1122.6	0.038	34	5	13	RCTTEINTK						Carbamidomethyl (C)[2]						Mascot
		1122.56		1122.6	0.038	34	5	13	RCTTEINTK						Carbamidomethyl (C)[2]						Mascot
		1211.7		1211.67	-0.0287	-24	103	114	ILSQPLADIGGK												Mascot
		1350.71		1350.75	0.042	31	63	75	GSPLALAQAHETR												Mascot
		1551.77		1551.84	0.071	46	334	347	RGPYAIEDMIAMGK												Mascot
		1567.76		1567.8	0.0348	22	334	347	RGPYAIEDMIAMGK						Oxidation (M)[9]						Mascot
		1583.76		1583.79	0.0358	23	334	347	RGPYAIEDMIAMGK						Oxidation (M)[9,12]						Mascot
		1738.02		1738.08	0.0545	31	215	231	LNEGVVQATLLALAGLR												Mascot
		1738.02		1738.08	0.0545	31	215	231	LNEGVVQATLLALAGLR												Mascot
		1866.12		1866.17	0.0539	29	214	231	KLNEGVVQATLLALAGLR												Mascot
		2134.16		2134.19	0.0354	17	78	97	LMASHPELAEDGAIQIVVI												Mascot
									K
		2193.97		2194.04	0.0647	29	263	281	SDDDIMANYLASLNHEET												Mascot
									R
		2209.97		2210.03	0.0585	26	263	281	SDDDIMANYLASLNHEET						Oxidation (M)[6]						Mascot
									R
		2551.34		2551.41	0.0733	29	161	186	DAFISLSAGSFAELPAGSI												Mascot
									IGTASLR
		2551.34		2551.41	0.0733	29	161	186	DAFISLSAGSFAELPAGSI			13	0								Mascot
									IGTASLR
	3	PREDICTED: porphobilinogen deaminase, chloroplastic										XP_004149732.1			40113.9	6.34		11	56	86.546	13	0
		[Cucumis sativus]
Project 1\Sample project20170120\R17064-4																				of	17	184
		Peptide Information
		Calc. Mass		Obsrv. Mass	± da	± ppm	Start	End	Sequence			Ion	C. I. %		Modification					Rank	Result Type
							Seq.	Seq.				Score
		935.494		935.534	0.04	43	311	319	TPIAGYASR												Mascot
		1083.6		1083.63	0.0363	33	159	167	TILPCNLPR						Carbamidomethyl (C)[5]						Mascot
		1097.46		1097.52	0.0647	59	320	328	DEDGNCIFK						Carbamidomethyl (C)[6]						Mascot
		1211.7		1211.67	-0.0287	-24	114	125	ILSQPLADIGGK												Mascot
		1350.71		1350.75	0.042	31	74	86	GSPLALAQAHETR												Mascot
		1551.77		1551.84	0.071	46	345	358	RGPYAIEDMIAMGK												Mascot
		1567.76		1567.8	0.0348	22	345	358	RGPYAIEDMIAMGK						Oxidation (M)[9]						Mascot
		1583.76		1583.79	0.0358	23	345	358	RGPYAIEDMIAMGK						Oxidation (M)[9,12]						Mascot
		1738.02		1738.08	0.0545	31	226	242	LNEGVVQATLLALAGLR												Mascot
		1738.02		1738.08	0.0545	31	226	242	LNEGVVQATLLALAGLR												Mascot
		1866.12		1866.17	0.0539	29	225	242	KLNEGVVQATLLALAGLR												Mascot
		2134.16		2134.19	0.0354	17	89	108	LMASHPELAEDGAIQIVVI												Mascot
									K
		2193.97		2194.04	0.0647	29	274	292	SDDDIMANYLASLNHEET												Mascot
									R
		2209.97		2210.03	0.0585	26	274	292	SDDDIMANYLASLNHEET						Oxidation (M)[6]						Mascot
									R
		2551.34		2551.41	0.0733	29	172	197	DAFISLSAGSFAELPAGSI												Mascot
									IGTASLR
		2551.34		2551.41	0.0733	29	172	197	DAFISLSAGSFAELPAGSI			13	0								Mascot
									IGTASLR
	4	hypothetical protein Csa_3G218170 [Cucumis sativus]										KGN57581.1			38659.9	5.19		12	55	83.825
		Peptide Information
		Calc. Mass		Obsrv. Mass	± da	± ppm	Start	End	Sequence			Ion	C. I. %		Modification					Rank	Result Type
							Seq.	Seq.				Score
		867.446		867.503	0.0576	66	149	155	VYDLTEK												Mascot
		1094.57		1094.6	0.0332	30	257	265	VQIAETFMR												Mascot
		1110.56		1110.57	0.0108	10	257	265	VQIAETFMR						Oxidation (M)[8]						Mascot
		1188.73		1188.64	-0.0888	-75	37	47	VGAGRLLLHPR												Mascot
		1245.59		1245.66	0.0791	64	48	59	GFAVPHNSDSSK												Mascot
		1245.59		1245.66	0.0791	64	48	59	GFAVPHNSDSSK												Mascot
		1565.8		1565.84	0.0376	24	24	36	WFPSDFPIISQTK												Mascot
		1670.94		1670.85	-0.0896	-54	220	235	SGLTAVLEKLEANAVR												Mascot
		1866		1866.17	0.1701	91	202	219	GGGSVTVLTEEKFPFIGK												Mascot
		2165.12		2165.15	0.0283	13	236	256	SPVYVADPSVQLIYVASG												Mascot
									SGR
		2165.12		2165.15	0.0283	13	236	256	SPVYVADPSVQLIYVASG												Mascot
									SGR
Project 1\Sample project20170120\R17064-4																				of	18	184
		2452.16		2452.16	0.0019	1	2	23	ELNLKPMDPSNFFTGEG												Mascot
									GSFHK
		2468.16		2468.15	-0.0088	-4	2	23	ELNLKPMDPSNFFTGEG						Oxidation (M)[7]						Mascot
									GSFHK
		2675.31		2675.39	0.074	28	315	338	TSIFGAFSPQVFEASFNL												Mascot
									TAHFEK
		2846.39		2846.47	0.0786	28	289	314	MAGEEGLECFTIITTTHPL						Carbamidomethyl (C)[9]						Mascot
									LEELGGK
		3421.62		3421.74	0.1201	35	88	118	GDVIPVPEGVTSWWFND												Mascot
									GDSDFEVLLVGDTR
	5	hypothetical protein Csa_5G198240 [Cucumis sativus]										KGN50634.1			33778.8	8.59		11	48	11.111
		Protein Group
		somatic embryogenesis MYB 1 transcription factor										CAI30890.1			33778.8		8.59
		[Cucumis sativus]															1525
																	8789
		transcription factor DIVARICATA-like [Cucumis sativus]										NP_001267652.1			33778.8		8.59
																	1525
																	8789
		unnamed protein product [Cucumis sativus]										CBD14027.1			33778.8		8.59
																	1525
																	8789
		unnamed protein product [Cucumis sativus]										CAX06367.1			33778.8		8.59
																	1525
																	8789
		Peptide Information
		Calc. Mass		Obsrv. Mass	± da	± ppm	Start	End	Sequence			Ion	C. I. %		Modification					Rank	Result Type
							Seq.	Seq.				Score
		1110.56		1110.57	0.0142	13	282	290	SIFQFEPSR												Mascot
		1202.6		1202.66	0.0595	49	169	178	YFMRQLSGGK						Oxidation (M)[3]						Mascot
		1211.57		1211.67	0.1016	84	123	132	GVPWTEEEHK												Mascot
		1405.75		1405.73	-0.0246	-17	248	261	LMSFPSGIAANGIK												Mascot
		1491.66		1491.79	0.1266	85	69	81	ELEEDVCEIEAGR												Mascot
		1510.92		1510.94	0.0184	12	51	65	VAALIPGKTVSDVIK												Mascot
		1755.88		1755.99	0.1136	65	123	136	GVPWTEEEHKQFLR												Mascot
		1780.88		1780.95	0.0681	38	158	172	TPTQVASHAQKYFMR						Oxidation (M)[14]						Mascot
		1856.96		1857.01	0.0507	27	152	168	NFVNSKTPTQVASHAQK												Mascot
		1967.9		1968.02	0.114	58	66	81	QYKELEEDVCEIEAGR						Carbamidomethyl (C)[10]						Mascot
		2452.23		2452.16	-0.0693	-28	182	203	RPSIHDITTVNLTEPTASE												Mascot
									NEK
	6	PREDICTED: legumin J-like [Cucumis sativus]										XP_011651276.1			33118	4.98		10	44	0
		Peptide Information
		Calc. Mass		Obsrv. Mass	± da	± ppm	Start	End	Sequence			Ion	C. I. %		Modification					Rank	Result Type
							Seq.	Seq.				Score
		867.446		867.503	0.0576	66	149	155	VYDLTEK												Mascot
Project 1\Sample project20170120\R17064-4				867.503																of	19	Mascot	184
		1094.57		1094.6	0.0332	30	257	265	VQIAETFMR												Mascot
		1110.56		1110.57	0.0108	10	257	265	VQIAETFMR						Oxidation (M)[8]						Mascot
		1188.73		1188.64	-0.0888	-75	37	47	VGAGRLLLHPR												Mascot
		1245.59		1245.66	0.0791	64	48	59	GFAVPHNSDSSK												Mascot
		1245.59		1245.66	0.0791	64	48	59	GFAVPHNSDSSK												Mascot
		1565.8		1565.84	0.0376	24	24	36	WFPSDFPIISQTK												Mascot
		1670.94		1670.85	-0.0896	-54	220	235	SGLTAVLEKLEANAVR												Mascot
		1866		1866.17	0.1701	91	202	219	GGGSVTVLTEEKFPFIGK												Mascot
		2165.12		2165.15	0.0283	13	236	256	SPVYVADPSVQLIYVASG												Mascot
									SGR
		2165.12		2165.15	0.0283	13	236	256	SPVYVADPSVQLIYVASG												Mascot
									SGR
		2452.16		2452.16	0.0019	1	2	23	ELNLKPMDPSNFFTGEG												Mascot
									GSFHK
		2468.16		2468.15	-0.0088	-4	2	23	ELNLKPMDPSNFFTGEG						Oxidation (M)[7]						Mascot
									GSFHK
		3421.62		3421.74	0.1201	35	88	118	GDVIPVPEGVTSWWFND												Mascot
									GDSDFEVLLVGDTR
	7	hypothetical protein Csa_3G684170 [Cucumis sativus]										KGN58559.1			125538	6.1		19	40	0
		Protein Group
		PREDICTED: disease resistance protein RGA2-like										XP_004149742.2			125538		6.0999
		[Cucumis sativus]															999046
																	3257
		Peptide Information
		Calc. Mass		Obsrv. Mass	± da	± ppm	Start	End	Sequence			Ion	C. I. %		Modification					Rank	Result Type
							Seq.	Seq.				Score
		870.529		870.579	0.0495	57	682	689	ITELGPLK												Mascot
		1064.55		1064.56	0.0073	7	694	702	CLSVLCLEK						Carbamidomethyl (C)[1]						Mascot
		1094.51		1094.6	0.0913	83	915	923	CSNLSINMR						Carbamidomethyl (C)[1]						Mascot
		1110.5		1110.57	0.069	62	915	923	CSNLSINMR						Carbamidomethyl (C)[1], Oxidation (M)[8]						Mascot
		1163.63		1163.64	0.0141	12	693	702	RCLSVLCLEK												Mascot
		1419.8		1419.76	-0.0386	-27	928	938	LWYLIIGWLDK												Mascot
		1453.73		1453.79	0.0576	40	939	950	LPEDLCHLMNLR												Mascot
		1670.76		1670.85	0.0914	55	508	521	MHDLVHDIAMETSR						Oxidation (M)[1]						Mascot
		1715.84		1715.9	0.0644	38	2	15	ADFLWTFAVEEMLK						Oxidation (M)[12]						Mascot
		1857.09		1857.01	-0.0757	-41	191	209	TSILPIVGMGGLGKTTLAK												Mascot
		1875.93		1875.93	-0.0013	-1	99	114	VCDFFSLSTDNVLIFR												Mascot
		1887.09		1887	-0.0909	-48	924	938	NKPKLWYLIIGWLDK												Mascot
		2075.11		2075.04	-0.0654	-32	299	318	ITGNSNNSILVTTRSAEVA												Mascot
									K
		2154.13		2154.17	0.0405	19	2	19	ADFLWTFAVEEMLKNVL												Mascot
									K
Project 1\Sample project20170120\R17064-4																				of	20	184
		2225.19		2225.12	-0.0776	-35	753	771	ITNFAGRHLPNNIFVENLR												Mascot
		2284.13		2284.19	0.0612	27	711	731	GADLAGKENLMALHLGW												Mascot
									SMNR
		2335.22		2335.34	0.1143	49	894	914	LTKLPDGLQFCSSIEGLTI						Carbamidomethyl (C)[11]						Mascot
									DK
		2382.05		2382.29	0.2342	98	874	893	AFDENNMQHLESLILSCC						Carbamidomethyl (C)[17], Oxidation (M)[7]						Mascot
									NK
		2468.33		2468.15	-0.1829	-74	181	204	QVIDASNNQRTSILPIVG												Mascot
									MGGLGK
		2846.38		2846.47	0.091	32	760	783	HLPNNIFVENLREIHLSHC												Mascot
									NSCEK
	8	putative porphobilinogen deaminase, partial [Cucumis										BAH84857.1			20409.6	5.1		6	40	0	13	0
		sativus]
		Peptide Information
		Calc. Mass		Obsrv. Mass	± da	± ppm	Start	End	Sequence			Ion	C. I. %		Modification					Rank	Result Type
							Seq.	Seq.				Score
		1083.6		1083.63	0.0363	33	29	37	TILPCNLPR						Carbamidomethyl (C)[5]						Mascot
		1211.57		1211.67	0.0983	81	170	180	AFLETLDGSCR												Mascot
		1738.02		1738.08	0.0545	31	96	112	LNEGVVQATLLALAGLR												Mascot
		1738.02		1738.08	0.0545	31	96	112	LNEGVVQATLLALAGLR												Mascot
		1866.12		1866.17	0.0539	29	95	112	KLNEGVVQATLLALAGLR												Mascot
		2193.97		2194.04	0.0647	29	144	162	SDDDIMANYLASLNHEET												Mascot
									R
		2209.97		2210.03	0.0585	26	144	162	SDDDIMANYLASLNHEET						Oxidation (M)[6]						Mascot
									R
		2551.34		2551.41	0.0733	29	42	67	DAFISLSAGSFAELPAGSI												Mascot
									IGTASLR
		2551.34		2551.41	0.0733	29	42	67	DAFISLSAGSFAELPAGSI			13	0								Mascot
									IGTASLR
	9	hypothetical protein Csa_7G420880 [Cucumis sativus]										KGN45095.1			120065	6.63		14	37	0	17	0
		Peptide Information
		Calc. Mass		Obsrv. Mass	± da	± ppm	Start	End	Sequence			Ion	C. I. %		Modification					Rank	Result Type
							Seq.	Seq.				Score
		870.541		870.579	0.0383	44	281	287	KPIEKQK												Mascot
		927.464		927.526	0.0619	67	2	9	AESEHRAK												Mascot
		1110.59		1110.57	-0.0181	-16	847	855	LEADKHELR												Mascot
		1177.66		1177.66	-0.0014	-1	728	737	NLLLEAVSYR												Mascot
		1325.67		1325.7	0.0275	21	665	675	EDILNTVQHEK												Mascot
		1543.79		1543.83	0.0363	24	743	755	NHMSSIEIEAKIR						Oxidation (M)[3]						Mascot
		1543.79		1543.83	0.0363	24	743	755	NHMSSIEIEAKIR			17	0		Oxidation (M)[3]						Mascot
		1670.86		1670.85	-0.0031	-2	767	780	VALQASVQFEYCKK						Carbamidomethyl (C)[12]						Mascot
		1715.85		1715.9	0.0533	31	596	611	YGGHISGSVEPVDRSR												Mascot
		1722.79		1722.93	0.1349	78	114	127	MDTHNKSEWLFNGK						Oxidation (M)[1]						Mascot
Project 1\Sample project20170120\R17064-4				1722.93																of	21	Mascot	184
		1776.89		1776.95	0.059	33	979	994	AASQTNTPQCFLLTPK						Carbamidomethyl (C)[10]						Mascot
		1856.92		1857.01	0.095	51	956	971	VVDEINQGMDPINERK												Mascot
		2134.11		2134.19	0.083	39	157	174	VCEFAKLTPVQLLEETEK						Carbamidomethyl (C)[2]						Mascot
		2145.93		2146.1	0.1717	80	1022	1040	AWSNGDSWGTLMNYVG						Oxidation (M)[12]						Mascot
									ESR
		2222.12		2222.07	-0.0444	-20	916	935	FRQSGQLQVLSAHHQSG												Mascot
									GER
	10	PREDICTED: structural maintenance of chromosomes										XP_004135946.1			121465	6.43		14	37	0	17	0
		protein 5 [Cucumis sativus]
		Peptide Information
		Calc. Mass		Obsrv. Mass	± da	± ppm	Start	End	Sequence			Ion	C. I. %		Modification					Rank	Result Type
							Seq.	Seq.				Score
		870.541		870.579	0.0383	44	281	287	KPIEKQK												Mascot
		927.464		927.526	0.0619	67	2	9	AESEHRAK												Mascot
		1110.59		1110.57	-0.0181	-16	859	867	LEADKHELR												Mascot
		1177.66		1177.66	-0.0014	-1	728	737	NLLLEAVSYR												Mascot
		1325.67		1325.7	0.0275	21	665	675	EDILNTVQHEK												Mascot
		1543.79		1543.83	0.0363	24	743	755	NHMSSIEIEAKIR						Oxidation (M)[3]						Mascot
		1543.79		1543.83	0.0363	24	743	755	NHMSSIEIEAKIR			17	0		Oxidation (M)[3]						Mascot
		1670.86		1670.85	-0.0031	-2	767	780	VALQASVQFEYCKK						Carbamidomethyl (C)[12]						Mascot
		1715.85		1715.9	0.0533	31	596	611	YGGHISGSVEPVDRSR												Mascot
		1722.79		1722.93	0.1349	78	114	127	MDTHNKSEWLFNGK						Oxidation (M)[1]						Mascot
		1776.89		1776.95	0.059	33	991	1006	AASQTNTPQCFLLTPK						Carbamidomethyl (C)[10]						Mascot
		1856.92		1857.01	0.095	51	968	983	VVDEINQGMDPINERK												Mascot
		2134.11		2134.19	0.083	39	157	174	VCEFAKLTPVQLLEETEK						Carbamidomethyl (C)[2]						Mascot
		2145.93		2146.1	0.1717	80	1034	1052	AWSNGDSWGTLMNYVG						Oxidation (M)[12]						Mascot
									ESR
		2222.12		2222.07	-0.0444	-20	928	947	FRQSGQLQVLSAHHQSG												Mascot
									GER
Project 1\Sample project20170120\R17064-4																				of	22	184
Gel Idx/Pos			273/L1						Instr./Gel Origin		BA2151/Sample Project 20170120						Process Status			Analysis Succeeded
Plate [#] Name			[1] Sample Project 20170120						Instrument Sample Name								Spectra			11
Rank		Protein Name						Species				Accession No.			Protein MW		Protein	Pep.	Protein	Protein	Total Ion	Total Ion
																	PI	Count	Score	Score	Score	C. I. %
																				C. I. %
	1	hypothetical protein Csa_6G147530 [Cucumis sativus]										KGN46860.1			61399.9	5.06		26	892	100	740	100
		Protein Group
		PREDICTED: ruBisCO large subunit-binding protein										XP_004145754.1			61399.9		5.0599
		subunit alpha [Cucumis sativus]															999427
																	7954
		Peptide Information
		Calc. Mass		Obsrv. Mass	± da	± ppm	Start	End	Sequence			Ion	C. I. %		Modification					Rank	Result Type
							Seq.	Seq.				Score
		940.571		940.579	0.0075	8	274	281	DIIPILEK												Mascot
		1028.57		1028.59	0.0143	14	253	261	LIAELENAR												Mascot
		1043.58		1043.6	0.0156	15	91	100	VVNDGVTIAR												Mascot
		1052.5		1052.52	0.0157	15	48	56	EIAFDQSSR												Mascot
		1052.5		1052.52	0.0157	15	48	56	EIAFDQSSR			57	99.979								Mascot
		1181.7		1181.72	0.0174	15	66	77	LANAVGLTLGPR												Mascot
		1181.7		1181.72	0.0174	15	66	77	LANAVGLTLGPR			18	0								Mascot
		1204.62		1204.63	0.013	11	80	90	NVVLDEFGSPK												Mascot
		1258.69		1258.7	0.0145	12	165	175	TVQGLIEELEK												Mascot
		1290.62		1290.64	0.0218	17	423	434	VGAATETELEDR												Mascot
		1479.75		1479.77	0.023	16	240	252	GYISPQFVTNPEK												Mascot
		1479.75		1479.77	0.023	16	240	252	GYISPQFVTNPEK			62	99.993								Mascot
		1499.67		1499.68	0.0092	6	394	406	ELAETDSVYDTEK												Mascot
		1517.78		1517.79	0.005	3	529	542	YENLVEAGVIDPAK												Mascot
		1582.92		1582.91	-0.0062	-4	144	159	LGLLNVTSGANPVSLK												Mascot
		1616.69		1616.7	0.0118	7	515	528	SSDWEIGYNAMTDK												Mascot
		1632.68		1632.7	0.0156	10	515	528	SSDWEIGYNAMTDK						Oxidation (M)[11]						Mascot
		1636.78		1636.8	0.0215	13	123	139	TNDSAGDGTTTASVLAR												Mascot
		1671.92		1671.93	0.0169	10	161	175	GIDKTVQGLIEELEK												Mascot
		1780.93		1780.94	0.0179	10	101	117	AIELPDPMENAGAALIR												Mascot
		1780.93		1780.94	0.0179	10	101	117	AIELPDPMENAGAALIR			145	100								Mascot
		1796.92		1796.93	0.0105	6	101	117	AIELPDPMENAGAALIR						Oxidation (M)[8]						Mascot
		1796.92		1796.93	0.0105	6	101	117	AIELPDPMENAGAALIR			103	100		Oxidation (M)[8]						Mascot
		1918.97		1918.99	0.021	11	370	387	DTTTIIADAASKDELQAR												Mascot
Project 1\Sample project20170120\R17064-4																				of	23	184
		2095.19		2095.21	0.021	10	57	77	TALQSGIDKLANAVGLTL												Mascot
									GPR
		2229.18		2229.17	-0.0056	-3	188	210	AVASISAGNDELIGLMIAD												Mascot
									AIGK
		2245.17		2245.15	-0.0242	-11	188	210	AVASISAGNDELIGLMIAD						Oxidation (M)[16]						Mascot
									AIGK
		2250.3		2250.29	-0.0086	-4	287	308	APLLIIAEDVTGEALATLV												Mascot
									VNK
		2278.27		2278.26	-0.0071	-3	490	512	ALVAPASLIAQNAGIEGE												Mascot
									VVVEK
		2278.27		2278.26	-0.0071	-3	490	512	ALVAPASLIAQNAGIEGE			70	99.999								Mascot
									VVVEK
		2824.54		2824.56	0.014	5	546	572	CALQNAASVAGMVLTTQ						Carbamidomethyl (C)[1]						Mascot
									AIVVEKPKPK
		2840.54		2840.52	-0.0152	-5	546	572	CALQNAASVAGMVLTTQ						Carbamidomethyl (C)[1], Oxidation (M)[12]						Mascot
									AIVVEKPKPK
		2916.62		2916.64	0.0246	8	443	472	NATFAAIEEGIVPGGGAA												Mascot
									LVHLSTLVPAIK
		2916.62		2916.64	0.0246	8	443	472	NATFAAIEEGIVPGGGAA			172	100								Mascot
									LVHLSTLVPAIK
		3026.41		3026.46	0.0456	15	211	239	VGPDGVLSIESSSSFETT												Mascot
									VDVEEGMAIDR
		3026.41		3026.46	0.0456	15	211	239	VGPDGVLSIESSSSFETT			216	100								Mascot
									VDVEEGMAIDR
		3042.41		3042.45	0.0363	12	211	239	VGPDGVLSIESSSSFETT						Oxidation (M)[25]						Mascot
									VDVEEGMAIDR
		3042.41		3042.45	0.0363	12	211	239	VGPDGVLSIESSSSFETT			35	96.102		Oxidation (M)[25]						Mascot
									VDVEEGMAIDR
		3115.46		3115.48	0.0232	7	515	542	SSDWEIGYNAMTDKYEN												Mascot
									LVEAGVIDPAK
		3131.45		3131.46	0.0103	3	515	542	SSDWEIGYNAMTDKYEN						Oxidation (M)[11]						Mascot
									LVEAGVIDPAK
		3741.97		3742.05	0.0794	21	329	363	AMLQDIAILTGAEFQAND												Mascot
									LGLLVENTTIEQLGLAR
		3757.97		3758.03	0.062	16	329	363	AMLQDIAILTGAEFQAND						Oxidation (M)[2]						Mascot
									LGLLVENTTIEQLGLAR
	2	Protein disulfide-isomerase [Cucumis sativus]										KGN47715.1			57045.6	4.88		12	83	99.973	46	99.744
		Protein Group
		PREDICTED: protein disulfide-isomerase [Cucumis										XP_004149798.1			57045.6		4.88
		sativus]															1144
																	4092
		Peptide Information
		Calc. Mass		Obsrv. Mass	± da	± ppm	Start	End	Sequence			Ion	C. I. %		Modification					Rank	Result Type
							Seq.	Seq.				Score
		1034.46		1034.5	0.0372	36	502	510	QDSEAKDEL												Mascot
		1106.58		1106.6	0.0153	14	100	108	ELATQFEIR												Mascot
		1170.54		1170.55	0.0099	8	172	181	LSGDEFNNFK												Mascot
		1516.78		1516.78	0.0036	2	340	352	FNVEADQIAPWVK												Mascot
		1578.81		1578.83	0.0199	13	469	481	SKEDIINFIETNR												Mascot
		1659.84		1659.85	0.0085	5	216	228	LFKPFDEQFVDFK												Mascot
		1909.87		1909.88	0.0124	6	394	408	NVLLEFYSPWCGHCK						Carbamidomethyl (C)[11,14]						Mascot
Project 1\Sample project20170120\R17064-4																				of	24	184
		2164.97		2165	0.0227	10	50	66	HDFIVVEFYAPWCGHCK						Carbamidomethyl (C)[13,16]						Mascot
		2331.2		2331.19	-0.0061	-3	410	431	LAPTLDEVAVSYESDPDV												Mascot
									VIAK
		2446.21		2446.23	0.0174	7	298	320	GEISFLIGDSESSQAALN												Mascot
									YFGLK
		2709.28		2709.32	0.0359	13	432	455	FDATANDIAVGDFEVQGY												Mascot
									PTLYFR
		2709.28		2709.32	0.0359	13	432	455	FDATANDIAVGDFEVQGY			46	99.744								Mascot
									PTLYFR
		2825.36		2825.54	0.1768	63	238	262	FIESSSIPTVTEFNNDPSN												Mascot
									HVYLSK
	3	PREDICTED: histidine kinase 1 isoform X1 [Cucumis										XP_004146149.2			137023	6.65		21	43	0
		sativus]
		Peptide Information
		Calc. Mass		Obsrv. Mass	± da	± ppm	Start	End	Sequence			Ion	C. I. %		Modification					Rank	Result Type
							Seq.	Seq.				Score
		1016.59		1016.53	-0.0556	-55	802	809	LITSQWLR												Mascot
		1043.56		1043.6	0.0409	39	944	951	DRNLELQR												Mascot
		1142.68		1142.61	-0.0634	-55	559	568	LLNNILDLSK												Mascot
		1158.66		1158.61	-0.0516	-45	638	647	FTTTGHIILR												Mascot
		1280.71		1280.6	-0.1037	-81	488	498	AELISHLDARR												Mascot
		1381.72		1381.73	0.0151	11	1101	1112	VTTIMLERMGAK						Oxidation (M)[5,9]						Mascot
		1479.81		1479.77	-0.0392	-26	31	43	VFCRISGLATSLR						Carbamidomethyl (C)[3]						Mascot
		1479.81		1479.77	-0.0392	-26	31	43	VFCRISGLATSLR						Carbamidomethyl (C)[3]						Mascot
		1499.72		1499.68	-0.0357	-24	1069	1082	SQGESHSNNVQGKK												Mascot
		1501.67		1501.74	0.0629	42	1143	1154	YDLILMDCQMPK						Oxidation (M)[6,10]						Mascot
		1517.88		1517.79	-0.0936	-62	1209	1221	LMVSTILSLTQRR												Mascot
		1862.92		1862.92	-0.0042	-2	898	913	AKFAWMLNHDTSNAIK						Oxidation (M)[6]						Mascot
		1876.97		1876.88	-0.0808	-43	569	585	VESGKLVLEDAEFDLGR												Mascot
		2074.91		2075.05	0.1416	68	694	711	MTLWFELDDTGCGIDSS						Carbamidomethyl (C)[12]						Mascot
									K
		2278.16		2278.26	0.0933	41	638	657	FTTTGHIILRGWCETSNTL												Mascot
									K
		2278.16		2278.26	0.0933	41	638	657	FTTTGHIILRGWCETSNTL												Mascot
									K
		2299.14		2299.16	0.0195	8	154	172	KYSKPVNQAEQVELYES												Mascot
									MR
		2315.13		2315.11	-0.0195	-8	154	172	KYSKPVNQAEQVELYES						Oxidation (M)[18]						Mascot
									MR
		2663.09		2663.32	0.2305	87	1045	1068	QNSSMSQCQSSESNEQ						Oxidation (M)[5]						Mascot
									NLGSNYPK
		2691.38		2691.33	-0.0499	-19	1113	1137	VIAFGDGLQAVEALTAML						Oxidation (M)[17]						Mascot
									SAEEQRR
		2720.46		2720.32	-0.1421	-52	862	885	DMKSQVFIIVADIGILDLST												Mascot
									DIWK
		2840.42		2840.52	0.1047	37	1020	1044	NSLVELTHVHSIEGNVKT												Mascot
									SDQYDVR
Project 1\Sample project20170120\R17064-4																				of	25	184
		2922.47		2922.45	-0.024	-8	1109	1136	MGAKVIAFGDGLQAVEAL						Oxidation (M)[1]						Mascot
									TAMLSAEEQR
		2938.46		2938.64	0.177	60	1109	1136	MGAKVIAFGDGLQAVEAL						Oxidation (M)[1,21]						Mascot
									TAMLSAEEQR
		3337.59		3337.78	0.1943	58	712	741	WESVFESFEQADPSTTR						Carbamidomethyl (C)[27]						Mascot
									THGGTGLGLCIVR
	4	PREDICTED: superkiller viralicidic activity 2-like 2										XP_004152892.1			114226	6.21		19	40	0
		[Cucumis sativus]
		Peptide Information
		Calc. Mass		Obsrv. Mass	± da	± ppm	Start	End	Sequence			Ion	C. I. %		Modification					Rank	Result Type
							Seq.	Seq.				Score
		1028.57		1028.59	0.0143	14	2	10	EESPILGKR												Mascot
		1106.65		1106.6	-0.0476	-43	775	783	KLYAHPLHK												Mascot
		1204.7		1204.63	-0.071	-59	144	153	QRVIYTSPLK												Mascot
		1280.51		1280.6	0.0965	75	367	377	ECEQHAMSMSK												Mascot
		1443.81		1443.8	-0.0068	-5	729	741	ESILLALEELGTR												Mascot
		1516.86		1516.78	-0.0791	-52	434	446	ELVELLFQEGLVK												Mascot
		1659.81		1659.85	0.0357	22	754	767	DMNIEDPEIVELVK						Oxidation (M)[2]						Mascot
		1728.85		1728.86	0.0097	6	480	495	FIGSGEYIQMSGRAGR												Mascot
		1812.9		1812.94	0.0352	19	447	463	ALFATETFAMGLNMPAK												Mascot
		1940.92		1940.94	0.0204	11	502	518	GICIIMIDEQMEMGTIK						Oxidation (M)[6]						Mascot
		2095.01		2095.21	0.2014	96	206	221	EVAWVIFDEIHYMRDR						Oxidation (M)[13]						Mascot
		2245.22		2245.15	-0.0726	-32	729	748	ESILLALEELGTRFPQGF												Mascot
									PK
		2401.01		2401.23	0.22	92	367	386	ECEQHAMSMSKLDFNTQ						Oxidation (M)[7]						Mascot
									EEK
		2442.04		2442.24	0.2061	84	367	386	ECEQHAMSMSKLDFNTQ						Carbamidomethyl (C)[2]						Mascot
									EEK
		2557.27		2557.43	0.1601	63	754	774	DMNIEDPEIVELVKQIEEL						Oxidation (M)[2]						Mascot
									ER
		2663.29		2663.32	0.0389	15	546	567	AEGQFTAEHVIRHSFHQF												Mascot
									QHEK
		2824.43		2824.56	0.1265	45	115	141	NESILVSAHTSAGKTAVA						Oxidation (M)[24]						Mascot
									EYAIAMAFR
		2825.37		2825.54	0.1666	59	169	194	DVGLMTGDVTLSPNASC						Carbamidomethyl (C)[17], Oxidation (M)[5,20]						Mascot
									LVMTTEILR
		2922.54		2922.45	-0.0967	-33	395	419	NAILCLNEEDRELPAIELM						Oxidation (M)[19]						Mascot
									LPLLQR
		2938.71		2938.64	-0.0711	-24	420	446	GIAVHHSGLLPVIKELVEL												Mascot
									LFQEGLVK
	5	hypothetical protein Csa_3G002710 [Cucumis sativus]										KGN55651.1			134767	7.05		21	40	0
		Protein Group
		PREDICTED: histidine kinase 1 isoform X2 [Cucumis										XP_011650283.1			134767		7.05
		sativus]															1907
																	3486
		Peptide Information
Project 1\Sample project20170120\R17064-4																				of	26	184
		Calc. Mass		Obsrv. Mass	± da	± ppm	Start	End	Sequence			Ion	C. I. %		Modification					Rank	Result Type
							Seq.	Seq.				Score
		1016.59		1016.53	-0.0556	-55	779	786	LITSQWLR												Mascot
		1043.56		1043.6	0.0409	39	921	928	DRNLELQR												Mascot
		1142.68		1142.61	-0.0634	-55	536	545	LLNNILDLSK												Mascot
		1158.66		1158.61	-0.0516	-45	615	624	FTTTGHIILR												Mascot
		1280.71		1280.6	-0.1037	-81	465	475	AELISHLDARR												Mascot
		1381.72		1381.73	0.0151	11	1078	1089	VTTIMLERMGAK						Oxidation (M)[5,9]						Mascot
		1479.81		1479.77	-0.0392	-26	8	20	VFCRISGLATSLR						Carbamidomethyl (C)[3]						Mascot
		1479.81		1479.77	-0.0392	-26	8	20	VFCRISGLATSLR						Carbamidomethyl (C)[3]						Mascot
		1499.72		1499.68	-0.0357	-24	1046	1059	SQGESHSNNVQGKK												Mascot
		1501.67		1501.74	0.0629	42	1120	1131	YDLILMDCQMPK						Oxidation (M)[6,10]						Mascot
		1517.88		1517.79	-0.0936	-62	1186	1198	LMVSTILSLTQRR												Mascot
		1862.92		1862.92	-0.0042	-2	875	890	AKFAWMLNHDTSNAIK						Oxidation (M)[6]						Mascot
		1876.97		1876.88	-0.0808	-43	546	562	VESGKLVLEDAEFDLGR												Mascot
		2074.91		2075.05	0.1416	68	671	688	MTLWFELDDTGCGIDSS						Carbamidomethyl (C)[12]						Mascot
									K
		2278.16		2278.26	0.0933	41	615	634	FTTTGHIILRGWCETSNTL												Mascot
									K
		2278.16		2278.26	0.0933	41	615	634	FTTTGHIILRGWCETSNTL												Mascot
									K
		2299.14		2299.16	0.0195	8	131	149	KYSKPVNQAEQVELYES												Mascot
									MR
		2315.13		2315.11	-0.0195	-8	131	149	KYSKPVNQAEQVELYES						Oxidation (M)[18]						Mascot
									MR
		2663.09		2663.32	0.2305	87	1022	1045	QNSSMSQCQSSESNEQ						Oxidation (M)[5]						Mascot
									NLGSNYPK
		2691.38		2691.33	-0.0499	-19	1090	1114	VIAFGDGLQAVEALTAML						Oxidation (M)[17]						Mascot
									SAEEQRR
		2720.46		2720.32	-0.1421	-52	839	862	DMKSQVFIIVADIGILDLST												Mascot
									DIWK
		2840.42		2840.52	0.1047	37	997	1021	NSLVELTHVHSIEGNVKT												Mascot
									SDQYDVR
		2922.47		2922.45	-0.024	-8	1086	1113	MGAKVIAFGDGLQAVEAL						Oxidation (M)[1]						Mascot
									TAMLSAEEQR
		2938.46		2938.64	0.177	60	1086	1113	MGAKVIAFGDGLQAVEAL						Oxidation (M)[1,21]						Mascot
									TAMLSAEEQR
		3337.59		3337.78	0.1943	58	689	718	WESVFESFEQADPSTTR						Carbamidomethyl (C)[27]						Mascot
									THGGTGLGLCIVR
	6	PREDICTED: 50S ribosomal protein L11, chloroplastic										XP_004145879.2			24569.2	9.82		8	39	0
		[Cucumis sativus]
		Peptide Information
		Calc. Mass		Obsrv. Mass	± da	± ppm	Start	End	Sequence			Ion	C. I. %		Modification					Rank	Result Type
							Seq.	Seq.				Score
		1028.58		1028.59	0.0069	7	68	77	LSVVSMAPPK												Mascot
Project 1\Sample project20170120\R17064-4																				of	27	184
		1582.9		1582.91	0.0116	7	68	83	LSVVSMAPPKAKPGGK						Oxidation (M)[6]						Mascot
		1636.77		1636.8	0.0318	19	195	208	LPDLNCTTIESAMR						Carbamidomethyl (C)[6], Oxidation (M)[13]						Mascot
		2165.15		2165	-0.1565	-72	209	229	IIAGTAANMGIEIDPPVLE						Oxidation (M)[9]						Mascot
									PK
		2250.11		2250.29	0.1767	79	189	208	TIAAEKLPDLNCTTIESAM						Carbamidomethyl (C)[12], Oxidation (M)[19]						Mascot
									R
		2299.19		2299.16	-0.0356	-15	100	122	ATPAPPVGPALGSKGVNI						Carbamidomethyl (C)[22], Oxidation (M)[19]						Mascot
									MAFCK
		2300.17		2300.23	0.0559	24	22	44	ISASSNRLSSPFLTSSSS												Mascot
									GLSSK
		3693.89		3694.12	0.2344	63	195	229	LPDLNCTTIESAMRIIAGT												Mascot
									AANMGIEIDPPVLEPK
	7	PREDICTED: uncharacterized protein LOC101210084										XP_004136441.1			34902.2	4.89		10	38	0
		[Cucumis sativus]
		Protein Group
		PREDICTED: uncharacterized protein LOC101210084										XP_011652540.1			34902.2		4.8899
		[Cucumis sativus]															998664
																	856
		hypothetical protein Csa_3G882960 [Cucumis sativus]										KGN60185.1			34902.2		4.8899
																	998664
																	856
		Peptide Information
		Calc. Mass		Obsrv. Mass	± da	± ppm	Start	End	Sequence			Ion	C. I. %		Modification					Rank	Result Type
							Seq.	Seq.				Score
		1204.61		1204.63	0.0234	19	274	283	CAKDQTNLVR						Carbamidomethyl (C)[1]						Mascot
		1516.78		1516.78	0.0043	3	292	304	CLGDILNTINDLR						Carbamidomethyl (C)[1]						Mascot
		1732.91		1732.91	0.0073	4	58	72	WKIVAENCTSLDVVR												Mascot
		2095.06		2095.21	0.1526	73	206	224	GGEEVEEKPLLSSPELEP												Mascot
									R
		2165.04		2165	-0.0479	-22	60	78	IVAENCTSLDVVRTSNQC						Carbamidomethyl (C)[6]						Mascot
									R
		2225.14		2225.13	-0.0107	-5	81	97	WDCLLIEHDVIKQWELK						Carbamidomethyl (C)[3]						Mascot
		2300.01		2300.23	0.2178	95	93	111	QWELKMPDDDSYWCLA												Mascot
									SGR
		2653.28		2653.4	0.1162	44	114	136	ELGLPENFDEELFKAIDN						Oxidation (M)[22]						Mascot
									VASMR
		2994.36		2994.45	0.09	30	137	165	ANQSDTEPDSDPEAAIG												Mascot
									NADEIAEPGPKR
		3040.58		3040.48	-0.1057	-35	21	50	SQIAVAPGWTAADCLVLV												Mascot
									NVIAAVEADCLK
	8	hypothetical protein Csa_5G517720 [Cucumis sativus]										KGN51325.1			51912.9	9.23		9	37	0	15	0
		Protein Group
		PREDICTED: protein FIZZY-RELATED 3 [Cucumis										XP_004142765.1			51912.9		9.2299
		sativus]															995422
																	3633
		Peptide Information
		Calc. Mass		Obsrv. Mass	± da	± ppm	Start	End	Sequence			Ion	C. I. %		Modification					Rank	Result Type
							Seq.	Seq.				Score
		Calc. Mass		Obsrv. Mass	± da	± ppm			Sequence				C. I. %		Modification					Rank	Result Type
Project 1\Sample project20170120\R17064-4																				of	28	184
		1043.52		1043.6	0.0844	81	24	32	LETFSGSFR												Mascot
		1052.53		1052.52	-0.0142	-13	50	58	FIPCRSSSR												Mascot
		1052.53		1052.52	-0.0142	-13	50	58	FIPCRSSSR			15	0								Mascot
		1142.58		1142.61	0.0298	26	244	253	VRTMGGHQTR												Mascot
		1158.58		1158.61	0.0318	27	244	253	VRTMGGHQTR						Oxidation (M)[4]						Mascot
		1499.67		1499.68	0.011	7	43	54	TSTCSDRFIPCR						Carbamidomethyl (C)[4,11]						Mascot
		1779.89		1779.94	0.047	26	409	424	YPSMAKVATLTGHTMR						Oxidation (M)[4]						Mascot
		1810.86		1810.94	0.0771	43	33	49	AISNLSSPSKTSTCSDR						Carbamidomethyl (C)[14]						Mascot
		1862.85		1862.92	0.0652	35	203	219	LCDLGPNDGVCSVQWTR												Mascot
		3024.47		3024.49	0.0222	7	389	414	NVNELVSTHGYSQNQIM												Mascot
									VWKYPSMAK
		3040.47		3040.48	0.0134	4	389	414	NVNELVSTHGYSQNQIM						Oxidation (M)[17]						Mascot
									VWKYPSMAK
		3337.55		3337.78	0.237	71	360	388	CIRFWNTANGHQLESVD						Carbamidomethyl (C)[1]						Mascot
									TGSQVCNLSWSK
	9	hypothetical protein Csa_4G343090 [Cucumis sativus]										KGN54511.1			150492	5.95		20	35	0
		Protein Group
		PREDICTED: uncharacterized protein LOC101223119										XP_004142715.1			150492		5.9499
		[Cucumis sativus]															998092
																	6514
		Peptide Information
		Calc. Mass		Obsrv. Mass	± da	± ppm	Start	End	Sequence			Ion	C. I. %		Modification					Rank	Result Type
							Seq.	Seq.				Score
		1016.56		1016.53	-0.0304	-30	1257	1265	AALKHHPDK												Mascot
		1034.6		1034.5	-0.0958	-93	343	351	GRHLNGRPK												Mascot
		1170.54		1170.55	0.0131	11	1127	1136	SFTAVCLCNR						Carbamidomethyl (C)[6]						Mascot
		1181.61		1181.72	0.1079	91	1170	1178	RANLYEMIR						Oxidation (M)[7]						Mascot
		1181.61		1181.72	0.1079	91	1170	1178	RANLYEMIR						Oxidation (M)[7]						Mascot
		1204.62		1204.63	0.0095	8	931	941	MIIEAADGLQK						Oxidation (M)[1]						Mascot
		1258.68		1258.7	0.0211	17	1219	1229	NKPLMEEAAKK												Mascot
		1616.76		1616.7	-0.0611	-38	1189	1201	KYMFIVENQSDDK												Mascot
		1632.76		1632.7	-0.0571	-35	1189	1201	KYMFIVENQSDDK						Oxidation (M)[3]						Mascot
		1659.88		1659.85	-0.0284	-17	67	80	STFNSQRPARSRPR												Mascot
		1732.8		1732.91	0.1166	67	802	816	QGHPFSTAIQETCEK						Carbamidomethyl (C)[13]						Mascot
		1909.83		1909.88	0.0581	30	172	189	CEQSSVNCENLLVDDGG												Mascot
									K
		2074.98		2075.05	0.075	36	802	818	QGHPFSTAIQETCEKWR						Carbamidomethyl (C)[13]						Mascot
		2260.97		2261.14	0.1662	74	696	718	TEQCCSSGFAGGVSTGP												Mascot
									TANCRK
		2677.38		2677.34	-0.0398	-15	894	917	VQVRAANCHLLLGETES												Mascot
Project 1\Sample project20170120\R17064-4				2677.34																of	29	Mascot	184
									ALQYFSK
		2720.19		2720.32	0.1262	46	690	717	VCSGLKTEQCCSSGFAG												Mascot
									GVSTGPTANCR
		2840.37		2840.52	0.1516	53	898	922	AANCHLLLGETESALQYF						Carbamidomethyl (C)[4]						Mascot
									SKCLESR
		2938.46		2938.64	0.1804	61	1137	1165	AAAYQGLGQIADAIADCN												Mascot
									LAIALAENYSK
		3008.38		3008.47	0.0871	29	314	341	VESSNVNFSCEEGVDVF												Mascot
									VFGSSSLNEVK
		3024.35		3024.49	0.1408	47	162	189	LSNLENSDNKCEQSSVN												Mascot
									CENLLVDDGGK
		3042.45		3042.45	-0.0008	0	998	1024	YEEAITLCEQSLCLAEKN						Carbamidomethyl (C)[8]						Mascot
									CIPESAISK
		3042.45		3042.45	-0.0008	0	998	1024	YEEAITLCEQSLCLAEKN						Carbamidomethyl (C)[8]						Mascot
									CIPESAISK
		3693.79		3694.12	0.3321	90	615	649	VMLGESSPLVNSFAPCTT												Mascot
									NPSVCTNENDVLLTGRK
	10	hypothetical protein Csa_2G354610 [Cucumis sativus]										KGN62435.1			99377	6.1		15	35	0
		Peptide Information
		Calc. Mass		Obsrv. Mass	± da	± ppm	Start	End	Sequence			Ion	C. I. %		Modification					Rank	Result Type
							Seq.	Seq.				Score
		1016.6		1016.53	-0.0702	-69	228	236	MARLSAIVR												Mascot
		1290.65		1290.64	-0.0081	-6	708	718	QDSDVMKAKPR						Oxidation (M)[6]						Mascot
		1517.66		1517.79	0.132	87	776	787	ETTYPCSIFEDR						Carbamidomethyl (C)[6]						Mascot
		1578.77		1578.83	0.0643	41	78	92	VDQAILTGESCSVEK												Mascot
		1636.7		1636.8	0.1026	63	376	388	ASYCNHHWESQFK												Mascot
		1659.88		1659.85	-0.0273	-16	486	500	DLTFIGLVGMLDPPR						Oxidation (M)[10]						Mascot
		1780.85		1780.94	0.0937	53	501	516	EEVRNAMLSCMTAGIR												Mascot
		1780.85		1780.94	0.0937	53	501	516	EEVRNAMLSCMTAGIR			3	0								Mascot
		1794.8		1794.95	0.1456	81	761	775	LTYTELMNFDTCSTR												Mascot
		1796.85		1796.93	0.0864	48	501	516	EEVRNAMLSCMTAGIR						Oxidation (M)[7]						Mascot
		1796.85		1796.93	0.0864	48	501	516	EEVRNAMLSCMTAGIR			2	0		Oxidation (M)[11]						Mascot
		1810.8		1810.94	0.1384	76	761	775	LTYTELMNFDTCSTR						Oxidation (M)[7]						Mascot
		1812.84		1812.94	0.0974	54	501	516	EEVRNAMLSCMTAGIR						Oxidation (M)[7,11]						Mascot
		1909.92		1909.88	-0.0398	-21	237	254	SLPSVETLGCTTVICSDK						Carbamidomethyl (C)[10]						Mascot
		1954.92		1955.1	0.1816	93	62	77	IPADMRMIEMMTSQLR						Oxidation (M)[5,7]						Mascot
		2225.11		2225.13	0.023	10	505	525	NAMLSCMTAGIRVIVVTG						Oxidation (M)[3,7]						Mascot
									DNK
		2250.14		2250.29	0.1467	65	505	525	NAMLSCMTAGIRVIVVTG						Carbamidomethyl (C)[6]						Mascot
									DNK
		2272.16		2272.29	0.1316	58	355	375	VGLPGFTSMPSALNMLS												Mascot
									KHER
		2840.38		2840.52	0.1457	51	427	452	CSSILCNEDGSTTVLTSS						Carbamidomethyl (C)[1]						Mascot
									VRIELEAR
		2978.51		2978.58	0.0711	24	582	609	MLVEALQHQNEVVAMTG												Mascot
									DGVNDAPALKK
Project 1\Sample project20170120\R17064-4																				of	30	184
		2982.45		2982.48	0.0339	11	418	446	GAPESIISRCSSILCNEDG												Mascot
									STTVLTSSVR
		2994.5		2994.45	-0.0564	-19	582	609	MLVEALQHQNEVVAMTG						Oxidation (M)[1]						Mascot
									DGVNDAPALKK
Project 1\Sample project20170120\R17064-4																				of	31	184
Gel Idx/Pos			274/L2						Instr./Gel Origin		BA2151/Sample Project 20170120						Process Status			Analysis Succeeded
Plate [#] Name			[1] Sample Project 20170120						Instrument Sample Name								Spectra			11
Rank		Protein Name						Species				Accession No.			Protein MW		Protein	Pep.	Protein	Protein	Total Ion	Total Ion
																	PI	Count	Score	Score	Score	C. I. %
																				C. I. %
	1	hypothetical protein Csa_6G448720 [Cucumis sativus]										KGN48214.1			67198.9	6.22		25	690	100	565	100
		Protein Group
		PREDICTED: threonine dehydratase biosynthetic,										XP_004143369.1			67198.9		6.2199
		chloroplastic-like [Cucumis sativus]															997901
																	9165
		Peptide Information
		Calc. Mass		Obsrv. Mass	± da	± ppm	Start	End	Sequence			Ion	C. I. %		Modification					Rank	Result Type
							Seq.	Seq.				Score
		929.367		929.388	0.0215	23	381	387	DMFEDTR						Oxidation (M)[2]						Mascot
		964.448		964.469	0.0207	21	351	358	QVGDENFR												Mascot
		1013.54		1013.55	0.013	13	108	115	RPEVIDER												Mascot
		1029.54		1029.49	-0.0426	-41	468	475	SVTEFKYR												Mascot
		1197.59		1197.62	0.0289	24	531	540	SSVPNEVFYR												Mascot
		1197.59		1197.62	0.0289	24	531	540	SSVPNEVFYR			69	99.998								Mascot
		1201.65		1201.67	0.0209	17	561	569	WNISLIHYR												Mascot
		1219.56		1219.59	0.0242	20	157	166	DDSQFVFSFK												Mascot
		1375.66		1375.69	0.0307	22	156	166	RDDSQFVFSFK												Mascot
		1375.66		1375.69	0.0307	22	156	166	RDDSQFVFSFK												Mascot
		1397.8		1397.79	-0.0064	-5	388	402	SILEPAGALSIAGAK												Mascot
		1489.77		1489.79	0.0185	12	94	107	DLQYPAGMLGAIPK						Oxidation (M)[8]						Mascot
		1521.81		1521.83	0.0264	17	547	560	SGALLQFLDAFSPR												Mascot
		1521.81		1521.83	0.0264	17	547	560	SGALLQFLDAFSPR			100	100								Mascot
		1552.8		1552.87	0.0645	42	599	613	LGFGYVVVSNDPASK												Mascot
		1574.84		1574.87	0.0289	18	129	142	VYDVAIESPLELAR												Mascot
		1574.84		1574.87	0.0289	18	129	142	VYDVAIESPLELAR			105	100								Mascot
		1598.82		1598.85	0.031	19	116	128	RQMEYLTNILSSK						Oxidation (M)[3]						Mascot
		1680.9		1681.01	0.1165	69	598	613	KLGFGYVVVSNDPASK												Mascot
		1680.9		1681.01	0.1165	69	598	613	KLGFGYVVVSNDPASK												Mascot
		1823.88		1823.92	0.0382	21	169	184	GAYNMMANLPKEALER						Oxidation (M)[5]						Mascot
		1879.96		1879.99	0.0363	19	185	204	GVICASAGNHAQGVALA						Carbamidomethyl (C)[4]						Mascot
									AGR
		1940.99		1940.97	-0.0183	-9	531	546	SSVPNEVFYRFTLPER												Mascot
		2056.14		2056.1	-0.0376	-18	362	380	ELIDGIVLVDKDAIAACIK						Carbamidomethyl (C)[17]						Mascot
Project 1\Sample project20170120\R17064-4				2056.1																of	32	Mascot	184
		2252.07		2252.11	0.0405	18	227	247	SLGGNVLLHGDTFDDAQ												Mascot
									EHAR
		2252.07		2252.11	0.0405	18	227	247	SLGGNVLLHGDTFDDAQ			104	100								Mascot
									EHAR
		2327.29		2327.32	0.0288	12	283	306	GPLHAIFVPVGGGGLLAG												Mascot
									VASFYK
		2438.2		2438.21	0.0124	5	314	336	IIGVEPNDANSMASALHN						Oxidation (M)[12]						Mascot
									DQVVK
		2798.44		2798.5	0.06	21	254	279	NLTIIPPFDNEDVIIGQGT												Mascot
									VGMEIGR
		2814.43		2814.48	0.0457	16	254	279	NLTIIPPFDNEDVIIGQGT						Oxidation (M)[22]						Mascot
									VGMEIGR
		2814.43		2814.48	0.0457	16	254	279	NLTIIPPFDNEDVIIGQGT			85	100		Oxidation (M)[22]						Mascot
									VGMEIGR
		2884.43		2884.49	0.0554	19	571	597	QGIISADVLVGLQIEGSEE												Mascot
									AEFHESAR
		2884.43		2884.49	0.0554	19	571	597	QGIISADVLVGLQIEGSEE			101	100								Mascot
									AEFHESAR
		3040.53		3040.59	0.0555	18	570	597	RQGIISADVLVGLQIEGSE												Mascot
									EAEFHESAR
	2	hypothetical protein Csa_6G497380 [Cucumis sativus]										KGN48688.1			117075	8.46		20	46	0
		Peptide Information
		Calc. Mass		Obsrv. Mass	± da	± ppm	Start	End	Sequence			Ion	C. I. %		Modification					Rank	Result Type
							Seq.	Seq.				Score
		1031.59		1031.57	-0.0203	-20	528	536	LVECAKALK						Carbamidomethyl (C)[4]						Mascot
		1197.65		1197.62	-0.0326	-27	679	688	VGLEFYTQLK												Mascot
		1197.65		1197.62	-0.0326	-27	679	688	VGLEFYTQLK												Mascot
		1201.66		1201.67	0.0077	6	311	321	LVMNIVAEQGK												Mascot
		1202.46		1202.56	0.0999	83	910	919	MNTMCQSSER						Oxidation (M)[1]						Mascot
		1358.56		1358.69	0.1292	95	909	919	RMNTMCQSSER						Oxidation (M)[2]						Mascot
		1479.75		1479.82	0.0769	52	716	729	SRAAPSMLVSTSEK						Oxidation (M)[7]						Mascot
		1536.78		1536.89	0.1106	72	559	572	FCKLIQSGIEDGAR												Mascot
		1543.89		1543.81	-0.0754	-49	311	324	LVMNIVAEQGKTLK												Mascot
		1574.77		1574.87	0.0982	62	325	338	DAQDDIICGLEVVK						Carbamidomethyl (C)[8]						Mascot
		1574.77		1574.87	0.0982	62	325	338	DAQDDIICGLEVVK						Carbamidomethyl (C)[8]						Mascot
		1600.8		1600.87	0.0762	48	287	299	NTPIYTRQCVMFK												Mascot
		1711.9		1711.91	0.0056	3	294	306	QCVMFKFQELILR						Carbamidomethyl (C)[2]						Mascot
		1730.84		1731	0.1664	96	696	712	NSPSIGVSMAVPSPSER						Oxidation (M)[9]						Mascot
		1823.95		1823.92	-0.0385	-21	867	883	GQACRTTHPALVLATER												Mascot
		1869.96		1870.02	0.0646	35	1009	1024	MYRPPLVHRNAGMAPK						Oxidation (M)[1,13]						Mascot
		2010.09		2010.05	-0.0387	-19	534	553	ALKVNVGTDPNADLGPV												Mascot
									TTK
		2055.95		2056.1	0.1504	73	837	854	SHWNETPRADSIPSSSE												Mascot
									R
		2867.39		2867.47	0.082	29	884	909	GLYVPTSHDAICLINHGN						Carbamidomethyl (C)[12]						Mascot
Project 1\Sample project20170120\R17064-4				2867.47																of	33	Mascot	184
									DSTSPSRR
		2867.39		2867.47	0.082	29	884	909	GLYVPTSHDAICLINHGN						Carbamidomethyl (C)[12]						Mascot
									DSTSPSRR
		2891.44		2891.44	-0.0044	-2	7	33	LTFFYNGLIGTDCKMGTQ												Mascot
									GQTGLVAQK
		2898.43		2898.5	0.0671	23	508	533	TCMAIDIIVSVGSSTLWEE						Carbamidomethyl (C)[2], Oxidation (M)[3]						Mascot
									KLVECAK
		3137.37		3137.42	0.0535	17	1039	1066	MYTQDPMVSADEFQCQ						Oxidation (M)[1,7]						Mascot
									GASLTLPASQRM
	3	PREDICTED: LOW QUALITY PROTEIN:										XP_011657940.1			118443	8.38		20	45	0
		uncharacterized protein LOC101207178 [Cucumis
		sativus]
		Peptide Information
		Calc. Mass		Obsrv. Mass	± da	± ppm	Start	End	Sequence			Ion	C. I. %		Modification					Rank	Result Type
							Seq.	Seq.				Score
		1031.59		1031.57	-0.0203	-20	528	536	LVECAKALK						Carbamidomethyl (C)[4]						Mascot
		1197.65		1197.62	-0.0326	-27	692	701	VGLEFYTQLK												Mascot
		1197.65		1197.62	-0.0326	-27	692	701	VGLEFYTQLK												Mascot
		1201.66		1201.67	0.0077	6	311	321	LVMNIVAEQGK												Mascot
		1202.46		1202.56	0.0999	83	923	932	MNTMCQSSER						Oxidation (M)[1]						Mascot
		1358.56		1358.69	0.1292	95	922	932	RMNTMCQSSER						Oxidation (M)[2]						Mascot
		1479.75		1479.82	0.0769	52	729	742	SRAAPSMLVSTSEK						Oxidation (M)[7]						Mascot
		1536.78		1536.89	0.1106	72	559	572	FCKLIQSGIEDGAR												Mascot
		1543.89		1543.81	-0.0754	-49	311	324	LVMNIVAEQGKTLK												Mascot
		1574.77		1574.87	0.0982	62	325	338	DAQDDIICGLEVVK						Carbamidomethyl (C)[8]						Mascot
		1574.77		1574.87	0.0982	62	325	338	DAQDDIICGLEVVK						Carbamidomethyl (C)[8]						Mascot
		1600.8		1600.87	0.0762	48	287	299	NTPIYTRQCVMFK												Mascot
		1711.9		1711.91	0.0056	3	294	306	QCVMFKFQELILR						Carbamidomethyl (C)[2]						Mascot
		1730.84		1731	0.1664	96	709	725	NSPSIGVSMAVPSPSER						Oxidation (M)[9]						Mascot
		1823.95		1823.92	-0.0385	-21	880	896	GQACRTTHPALVLATER												Mascot
		1869.96		1870.02	0.0646	35	1022	1037	MYRPPLVHRNAGMAPK						Oxidation (M)[1,13]						Mascot
		2010.09		2010.05	-0.0387	-19	534	553	ALKVNVGTDPNADLGPV												Mascot
									TTK
		2055.95		2056.1	0.1504	73	850	867	SHWNETPRADSIPSSSE												Mascot
									R
		2867.39		2867.47	0.082	29	897	922	GLYVPTSHDAICLINHGN						Carbamidomethyl (C)[12]						Mascot
									DSTSPSRR
		2867.39		2867.47	0.082	29	897	922	GLYVPTSHDAICLINHGN						Carbamidomethyl (C)[12]						Mascot
									DSTSPSRR
		2891.44		2891.44	-0.0044	-2	7	33	LTFFYNGLIGTDCKMGTQ												Mascot
									GQTGLVAQK
		2898.43		2898.5	0.0671	23	508	533	TCMAIDIIVSVGSSTLWEE						Carbamidomethyl (C)[2], Oxidation (M)[3]						Mascot
									KLVECAK
		3137.37		3137.42	0.0535	17	1052	1079	MYTQDPMVSADEFQCQ						Oxidation (M)[1,7]						Mascot
									GASLTLPASQRM
Project 1\Sample project20170120\R17064-4																				of	34	184
	4	hypothetical protein Csa_1G024810 [Cucumis sativus]										KGN63849.1			137012	8.93		18	43	0	10	0
		Protein Group
		PREDICTED: ATP-dependent RNA helicase DHX36										XP_004137549.2			137012		8.93
		[Cucumis sativus]															3051
																	7578
		Peptide Information
		Calc. Mass		Obsrv. Mass	± da	± ppm	Start	End	Sequence			Ion	C. I. %		Modification					Rank	Result Type
							Seq.	Seq.				Score
		947.531		947.445	-0.0859	-91	310	317	SLPAFKER												Mascot
		1375.64		1375.69	0.0559	41	1204	1215	NTNPSFHSAKWS												Mascot
		1375.64		1375.69	0.0559	41	1204	1215	NTNPSFHSAKWS												Mascot
		1489.78		1489.79	0.0146	10	428	440	GVSHVIVDEIHER												Mascot
		1521.77		1521.83	0.0634	42	371	384	ISAMSVSERVAAER						Oxidation (M)[4]						Mascot
		1521.77		1521.83	0.0634	42	371	384	ISAMSVSERVAAER			10	0		Oxidation (M)[4]						Mascot
		1547.82		1547.85	0.0275	18	609	622	DQLLSHPLLGDPSR												Mascot
		1680.97		1681.01	0.0464	28	209	222	RPQREVVLPFGVQR												Mascot
		1680.97		1681.01	0.0464	28	209	222	RPQREVVLPFGVQR												Mascot
		1730.86		1731	0.1478	85	623	638	VLLLACHGSMASSEQK						Carbamidomethyl (C)[6]						Mascot
		1780.94		1780.96	0.0211	12	886	900	NFLSMQTLRAIDSLR						Oxidation (M)[5]						Mascot
		1788.82		1788.98	0.1601	90	1	14	MPYSSSFFNSYFRR												Mascot
		1889.91		1890.03	0.126	67	856	871	DCSDHLALVRAYQGWR												Mascot
		1922.98		1923.06	0.083	43	996	1014	DSTGVSDSVLLLFGGNV												Mascot
									SR
		2252.09		2252.11	0.0193	9	678	697	ETSYDALNNTPCLLPSWI												Mascot
									SK
		2252.09		2252.11	0.0193	9	678	697	ETSYDALNNTPCLLPSWI												Mascot
									SK
		2709.38		2709.31	-0.0779	-29	651	675	IVLATNMAETSITINDVVF						Carbamidomethyl (C)[23]						Mascot
									VVDCGK
		2796.45		2796.47	0.0162	6	650	675	KIVLATNMAETSITINDVV						Oxidation (M)[8]						Mascot
									FVVDCGK
		2867.49		2867.47	-0.022	-8	651	677	IVLATNMAETSITINDVVF						Oxidation (M)[7]						Mascot
									VVDCGKAK
		2867.49		2867.47	-0.022	-8	651	677	IVLATNMAETSITINDVVF						Oxidation (M)[7]						Mascot
									VVDCGKAK
		2903.46		2903.49	0.0359	12	15	39	TSMSISFKPTSPFPFSTR												Mascot
									FTPWTPR
		2947.62		2947.48	-0.1421	-48	806	832	LGKMLILGAIFNCLDPIMTI						Carbamidomethyl (C)[13], Oxidation (M)[4,18]						Mascot
									VAGLSVR
		3075.57		3075.52	-0.053	-17	1170	1198	DAAAEALLWLQGETHSS												Mascot
									SQAIDHASILLK
	5	PREDICTED: filament-like plant protein 7 [Cucumis										XP_011649333.1			122119	5.69		20	40	0
		sativus]
		Protein Group
		PREDICTED: filament-like plant protein 7 [Cucumis										XP_011649334.1			122119		5.69
Project 1\Sample project20170120\R17064-4																				of	35	184
		sativus]															572
																	2046
		PREDICTED: filament-like plant protein 7 [Cucumis										XP_011649332.1			122119		5.69
		sativus]															572
																	2046
		PREDICTED: filament-like plant protein 7 [Cucumis										XP_004149690.1			122119		5.69
		sativus]															572
																	2046
		hypothetical protein Csa_2G279230 [Cucumis sativus]										KGN61986.1			122119		5.69
																	572
																	2046
		Peptide Information
		Calc. Mass		Obsrv. Mass	± da	± ppm	Start	End	Sequence			Ion	C. I. %		Modification					Rank	Result Type
							Seq.	Seq.				Score
		907.412		907.346	-0.0663	-73	118	124	ECMQQLR												Mascot
		947.461		947.445	-0.0165	-17	283	290	NEVEMLGR												Mascot
		964.434		964.469	0.0352	36	118	124	ECMQQLR						Carbamidomethyl (C)[2]						Mascot
		1197.57		1197.62	0.0443	37	141	150	TSNEFEKSQK												Mascot
		1197.57		1197.62	0.0443	37	141	150	TSNEFEKSQK												Mascot
		1275.64		1275.75	0.1099	86	70	80	LTNMEQEAIAR												Mascot
		1479.72		1479.82	0.1058	72	571	583	MSEKPLGIDSVCK						Carbamidomethyl (C)[12], Oxidation (M)[1]						Mascot
		1503.84		1503.83	-0.0107	-7	16	29	ITVSSDKVNLSVNK												Mascot
		1536.78		1536.89	0.118	77	239	252	TADASHKQHLDSVK												Mascot
		1574.82		1574.87	0.0506	32	340	353	EALSKMNNELQVAK												Mascot
		1574.82		1574.87	0.0506	32	340	353	EALSKMNNELQVAK												Mascot
		1600.84		1600.87	0.0374	23	531	544	APERILEDIQAAMK						Oxidation (M)[13]						Mascot
		1661.75		1661.82	0.076	46	631	645	DGSVYSETPTGYMVR												Mascot
		1941		1940.97	-0.0362	-19	109	124	VIHLDAALKECMQQLR						Carbamidomethyl (C)[11], Oxidation (M)[12]						Mascot
		2072.94		2073.01	0.0659	32	436	453	IVGSTDLDLMDDFVEMEK						Oxidation (M)[10]						Mascot
		2234.05		2234.13	0.0781	35	299	319	QKNSTGSLDSSLENSPE												Mascot
									TPSR
		2349.15		2349.3	0.1458	62	190	210	QLAGMEADLNALVSRLE						Oxidation (M)[5]						Mascot
									SMER
		2366.11		2366.29	0.1743	74	631	650	DGSVYSETPTGYMVRVF						Oxidation (M)[13]						Mascot
									QWK
		2565.27		2565.38	0.1175	46	837	858	LVNQDLETELTAARNDLN												Mascot
									ENHR
		2753.22		2753.46	0.2351	85	429	453	GSSTTCKIVGSTDLDLMD						Oxidation (M)[17,23]						Mascot
									DFVEMEK
		2798.33		2798.5	0.166	59	871	893	NSCFEELEATCLELQLQL						Carbamidomethyl (C)[3,11]						Mascot
									ESTRK
		2830.21		2830.48	0.2761	98	545	570	CQNPGNSINTKEDGNHC						Carbamidomethyl (C)[1]						Mascot
									GDIACNNVR
		2906.43		2906.46	0.0318	11	495	519	EMVPKPCSNLGSCLTYP						Carbamidomethyl (C)[7]						Mascot
									DWLQNILK
		2944.25		2944.53	0.2806	95	545	570	CQNPGNSINTKEDGNHC						Carbamidomethyl (C)[1,17,22]						Mascot
									GDIACNNVR
Project 1\Sample project20170120\R17064-4																				of	36	184
	6	hypothetical protein Csa_2G020940 [Cucumis sativus]										KGN60871.1			135991	7.93		20	40	0
		Protein Group
		PREDICTED: TMV resistance protein N-like [Cucumis										XP_011648798.1			135991		7.9299
		sativus]															998283
																	3862
		Peptide Information
		Calc. Mass		Obsrv. Mass	± da	± ppm	Start	End	Sequence			Ion	C. I. %		Modification					Rank	Result Type
							Seq.	Seq.				Score
		947.404		947.445	0.041	43	1041	1047	HYPDMER												Mascot
		1013.55		1013.55	-0.0023	-2	131	138	HQPKFQTK												Mascot
		1547.84		1547.85	0.0023	1	553	566	LDLPNPINVNVDPK												Mascot
		1563.83		1563.84	0.0155	10	818	831	ELPSSLGYLTQLDK												Mascot
		1596.92		1596.86	-0.0613	-38	779	792	LKSLVYLVLFGCGK						Carbamidomethyl (C)[12]						Mascot
		1598.81		1598.85	0.0382	24	453	466	DIFLDISCLFVGEK												Mascot
		1617.75		1617.83	0.0786	49	381	394	ESHPSSNYLDLAER												Mascot
		1661.84		1661.82	-0.0192	-12	30	43	TNFTSHLDMALRQK												Mascot
		1695.94		1695.94	0.0077	5	401	416	GHPLALVVLGSFLCNR												Mascot
		1879.94		1879.99	0.0548	29	1041	1056	HYPDMERTLAVAVSFK						Oxidation (M)[5]						Mascot
		1927.02		1927.05	0.0313	16	964	979	NCKFLQEIPNLPQNIR												Mascot
		2073.03		2073.01	-0.0203	-10	1147	1162	WPMVNYADFYQLEKLR												Mascot
		2349.22		2349.3	0.0789	34	395	416	ATSYCKGHPLALVVLGSF												Mascot
									LCNR
		2366.2		2366.29	0.0871	37	944	963	FSSLPSCLHKFMSLSNLE						Carbamidomethyl (C)[7]						Mascot
									LR
		2709.29		2709.31	0.0188	7	502	525	VQMHGLIQQMGHSIVHN						Oxidation (M)[3]						Mascot
									ESFESGK
		2755.38		2755.36	-0.0222	-8	915	938	SCNISSAKFLEILCDVAPF						Carbamidomethyl (C)[2,14]						Mascot
									LSDLR
		2866.42		2866.49	0.0706	25	655	680	IPDLSAASNLEELYLINCT						Oxidation (M)[23]						Mascot
									NLGMIDK
		2881.38		2881.48	0.0986	34	502	526	VQMHGLIQQMGHSIVHN						Oxidation (M)[3,10]						Mascot
									ESFESGKR
		2906.49		2906.46	-0.0329	-11	474	499	MLSACHLNVDFGIMILMD												Mascot
									LSLVTIEK
		2947.44		2947.48	0.0388	13	370	394	AIELFSWHAFKESHPSSN												Mascot
									YLDLAER
	7	PREDICTED: heat shock 70 kDa protein 8 [Cucumis										XP_004134140.1			61945.8	5.52		13	39	0
		sativus]
		Protein Group
		PREDICTED: heat shock 70 kDa protein 8 [Cucumis										XP_011650982.1			61945.8		5.5199
		sativus]															999809
																	2651
		hypothetical protein Csa_3G147740 [Cucumis sativus]										KGN56991.1			61945.8		5.5199
																	999809
																	2651
Project 1\Sample project20170120\R17064-4																				of	37	184
		Peptide Information
		Calc. Mass		Obsrv. Mass	± da	± ppm	Start	End	Sequence			Ion	C. I. %		Modification					Rank	Result Type
							Seq.	Seq.				Score
		1013.48		1013.55	0.071	70	154	161	MMAEYQLK												Mascot
		1029.47		1029.49	0.0194	19	154	161	MMAEYQLK						Oxidation (M)[1]						Mascot
		1397.75		1397.79	0.0478	34	558	569	YGATMELVTLRK						Oxidation (M)[5]						Mascot
		1552.86		1552.87	0.0024	2	291	304	MGLLRVATQDAIHK												Mascot
		1567.81		1567.78	-0.0314	-20	154	165	MMAEYQLKRPIR						Oxidation (M)[1,2]						Mascot
		1617.75		1617.83	0.0824	51	330	342	EDFEMVNSKVFEK						Oxidation (M)[5]						Mascot
		1789		1788.98	-0.023	-13	138	153	STTPEEVLAIFIVELK												Mascot
		1865.96		1866.03	0.0746	40	305	322	LSFQSSVEINVSLGNGSK												Mascot
		1940.87		1940.97	0.0964	50	2	19	AEPIYTVASDSETTGEDR												Mascot
		2009.93		2010.05	0.1139	57	501	518	GVPEITICMDIDSSNMLR						Oxidation (M)[9]						Mascot
		2071.91		2072.02	0.1103	53	1	19	MAEPIYTVASDSETTGED												Mascot
									R
		2755.39		2755.36	-0.0334	-12	226	252	IALIFNMGAGYCDVAVSAI						Carbamidomethyl (C)[12], Oxidation (M)[7]						Mascot
									GGGVSQIR
		2799.46		2799.5	0.043	15	138	161	STTPEEVLAIFIVELKMMA						Oxidation (M)[17]						Mascot
									EYQLK
		2883.43		2883.48	0.0517	18	456	480	ELVFTTIQDNQSEALIVVY												Mascot
									EGEETR
	8	hypothetical protein Csa_4G050840 [Cucumis sativus]										KGN53381.1			78144.8	6.96		15	38	0
		Protein Group
		PREDICTED: translation initiation factor IF-2,										XP_004149759.1			78144.8		6.96
		mitochondrial [Cucumis sativus]															381
																	4697
		Peptide Information
		Calc. Mass		Obsrv. Mass	± da	± ppm	Start	End	Sequence			Ion	C. I. %		Modification					Rank	Result Type
							Seq.	Seq.				Score
		929.469		929.388	-0.0803	-86	124	132	HSIGSVSDK												Mascot
		1031.54		1031.57	0.0346	34	671	679	EKQDVDAVK												Mascot
		1385.68		1385.75	0.0629	45	315	326	CDKPAADPERVK						Carbamidomethyl (C)[1]						Mascot
		1397.67		1397.79	0.1205	86	712	724	FISSESGAVRIEC												Mascot
		1503.75		1503.83	0.0786	52	74	86	RCFHSSAELLAGR						Carbamidomethyl (C)[2]						Mascot
		1563.71		1563.84	0.1286	82	489	501	TETEEQSEEVVQR												Mascot
		1573.78		1573.79	0.0038	2	565	580	NPPSSISQSATQAGTK												Mascot
		1695.89		1695.94	0.0566	33	133	147	TIEIFDGMTIVELAK						Oxidation (M)[8]						Mascot
		1730.94		1731	0.0606	35	610	625	VAGEGEVLNIFELKGR												Mascot
		1865.98		1866.03	0.0559	30	653	669	LLRSGEVLFEGSCASLK						Carbamidomethyl (C)[13]						Mascot
		1879.91		1879.99	0.0799	43	403	420	AGTLGSGQFVVVGCEW						Carbamidomethyl (C)[14]						Mascot
Project 1\Sample project20170120\R17064-4				1879.99																of	38	Mascot	184
									GR
		2073.03		2073.01	-0.022	-11	448	466	GLPMAGDDIIVVESEERA						Oxidation (M)[4]						Mascot
									R
		2252.1		2252.11	0.0061	3	354	373	TGLDSLEEALLLQAEMM						Oxidation (M)[16,17]						Mascot
									DLK
		2252.1		2252.11	0.0061	3	354	373	TGLDSLEEALLLQAEMM						Oxidation (M)[16,17]						Mascot
									DLK
		2565.33		2565.38	0.0518	20	556	580	AYIVGFNVKNPPSSISQS												Mascot
									ATQAGTK
		2799.31		2799.5	0.1905	68	48	73	FIPDVPCGSAYHGSDFYV												Mascot
									ASTIEAPR
	9	hypothetical protein Csa_3G592140 [Cucumis sativus]										KGN58209.1			20161.5	9.86		7	38	0
		Peptide Information
		Calc. Mass		Obsrv. Mass	± da	± ppm	Start	End	Sequence			Ion	C. I. %		Modification					Rank	Result Type
							Seq.	Seq.				Score
		1201.63		1201.67	0.0427	36	2	11	HVVERGMFAR												Mascot
		1358.72		1358.69	-0.0348	-26	62	73	HVLSCILQNFGK												Mascot
		2060.07		2060.15	0.0822	40	55	73	VSQGSSRHVLSCILQNFG												Mascot
									K
		2565.29		2565.38	0.0901	35	140	160	TGIYSWDYFFHLGSNKFT												Mascot
									LLR
		2891.4		2891.44	0.0398	14	23	47	VRYCTDTIAFAQLCGTVL						Carbamidomethyl (C)[4], Oxidation (M)[19]						Mascot
									MELDEVK
		2909.36		2909.52	0.1565	54	25	50	YCTDTIAFAQLCGTVLME						Oxidation (M)[17]						Mascot
									LDEVKDSK
		2944.44		2944.53	0.0869	30	132	155	ILFDDLHRTGIYSWDYFF												Mascot
									HLGSNK
	10	hypothetical protein Csa_5G604290 [Cucumis sativus]										KGN51884.1			44870.5	6.72		11	37	0
		Protein Group
		PREDICTED: protein TWIN LOV 1 [Cucumis sativus]										XP_011655669.1			44870.5		6.7199
																	997901
																	9165
		Peptide Information
		Calc. Mass		Obsrv. Mass	± da	± ppm	Start	End	Sequence			Ion	C. I. %		Modification					Rank	Result Type
							Seq.	Seq.				Score
		1275.71		1275.75	0.0404	32	91	100	EIQINLLNYR												Mascot
		1567.76		1567.78	0.0202	13	387	401	VAVRSLSMTVGCSQG						Carbamidomethyl (C)[12], Oxidation (M)[8]						Mascot
		1661.89		1661.82	-0.0621	-37	88	100	EEKEIQINLLNYR												Mascot
		1893.87		1894.01	0.1409	74	142	157	CGFVRIQGDSHENEFR												Mascot
		2010.01		2010.05	0.0407	20	314	330	ESLQSEQACTVRILNYR												Mascot
		2054.95		2055.02	0.076	37	168	184	RELMSDSISELDCTLNR						Carbamidomethyl (C)[13], Oxidation (M)[4]						Mascot
		2709.09		2709.31	0.2173	80	185	208	DSQPDSNSRGVEIEEPC						Carbamidomethyl (C)[17]						Mascot
									EACDDEK
		2750.47		2750.61	0.1472	54	211	236	AAIAISNILFVLTHHSEVT												Mascot
									GGLVCER
		2750.47		2750.61	0.1472	54	211	236	AAIAISNILFVLTHHSEVT												Mascot
Project 1\Sample project20170120\R17064-4				2750.61																of	39	Mascot	184
									GGLVCER
		2755.35		2755.36	0.0037	1	259	282	QSFVLTDPNLPDMPIVYA						Oxidation (M)[13]						Mascot
									SDEFLK
		2807.49		2807.41	-0.0725	-26	211	236	AAIAISNILFVLTHHSEVT						Carbamidomethyl (C)[24]						Mascot
									GGLVCER
		2812.24		2812.43	0.1958	70	169	193	ELMSDSISELDCTLNRDS												Mascot
									QPDSNSR
		2906.57		2906.46	-0.1101	-38	211	237	AAIAISNILFVLTHHSEVT												Mascot
									GGLVCERR
Project 1\Sample project20170120\R17064-4																				of	40	184
Gel Idx/Pos			275/L3						Instr./Gel Origin		BA2151/Sample Project 20170120						Process Status			Analysis Succeeded
Plate [#] Name			[1] Sample Project 20170120						Instrument Sample Name								Spectra			11
Rank		Protein Name						Species				Accession No.			Protein MW		Protein	Pep.	Protein	Protein	Total Ion	Total Ion
																	PI	Count	Score	Score	Score	C. I. %
																				C. I. %
	1	PSII reaction center subunit V (chloroplast) [Cucumis										AAZ94668.1			9380.7	4.83		4	104	100	80	100
		sativus]
		Protein Group
		RecName: Full=Cytochrome b559 subunit alpha;										sp|Q4VZH5.1|PSB			9380.7		4.8299
		AltName: Full=PSII reaction center subunit V										E_CUCSA					999237
																	605
		cytochrome b559 alpha chain (chloroplast) [Cucumis										CAJ00775.1			9380.7		4.8299
		sativus]															999237
																	605
		photosystem II cytochrome b559 alpha subunit										ABI98762.1			9380.7		4.8299
		(chloroplast) [Cucumis sativus]															999237
																	605
		photosystem II cytochrome b559 alpha subunit										ABI97434.1			9380.7		4.8299
		(chloroplast) [Cucumis sativus]															999237
																	605
		photosystem II protein V (chloroplast) [Cucumis sativus]										YP_247616.1			9380.7		4.8299
																	999237
																	605
		Peptide Information
		Calc. Mass		Obsrv. Mass	± da	± ppm	Start	End	Sequence			Ion	C. I. %		Modification					Rank	Result Type
							Seq.	Seq.				Score
		954.573		954.586	0.0129	14	61	69	QGIPLITGR												Mascot
		954.573		954.586	0.0129	14	61	69	QGIPLITGR												Mascot
		1122.62		1122.62	0.0031	3	9	18	SFADIITSIR												Mascot
		1485.69		1485.7	0.0178	12	70	81	FDSLEQLDEFSR												Mascot
		1485.69		1485.7	0.0178	12	70	81	FDSLEQLDEFSR			80	100								Mascot
		1796.91		1796.96	0.0486	27	2	18	SGSTGERSFADIITSIR												Mascot
	2	hypothetical protein Csa_3G386810 [Cucumis sativus]										KGN57908.1			54382	5.71		5	94	99.998	86	100
		Protein Group
		PREDICTED: 11S globulin seed storage protein 2-like										XP_011652795.1			54382		5.71
		[Cucumis sativus]															381
																	4697
		Peptide Information
		Calc. Mass		Obsrv. Mass	± da	± ppm	Start	End	Sequence			Ion	C. I. %		Modification					Rank	Result Type
							Seq.	Seq.				Score
		821.382		821.349	-0.033	-40	416	422	TSNQPMK						Oxidation (M)[6]						Mascot
		1014.45		1014.46	0.0125	12	143	150	TEEDQHQK												Mascot
Project 1\Sample project20170120\R17064-4				1014.46																of	41	Mascot	184
		1263.63		1263.65	0.0177	14	199	211	GSFLAGGVPSESR												Mascot
		1263.63		1263.65	0.0177	14	199	211	GSFLAGGVPSESR			86	100								Mascot
		1283.63		1283.68	0.0427	33	143	152	TEEDQHQKIR												Mascot
		1518.8		1518.81	0.0102	7	197	211	VRGSFLAGGVPSESR												Mascot
	3	PREDICTED: uncharacterized protein LOC101217008										XP_011650591.1			139707	9.53		25	49	32.571
		isoform X2 [Cucumis sativus]
		Peptide Information
		Calc. Mass		Obsrv. Mass	± da	± ppm	Start	End	Sequence			Ion	C. I. %		Modification					Rank	Result Type
							Seq.	Seq.				Score
		856.493		856.535	0.0424	50	1202	1208	VWVDLPK												Mascot
		885.418		885.366	-0.0516	-58	665	671	CIYFDPK												Mascot
		1037.6		1037.54	-0.0631	-61	966	974	VAVWAKAHR												Mascot
		1122.52		1122.62	0.0976	87	955	965	KGCPDSSSVSR												Mascot
		1126.58		1126.54	-0.041	-36	936	944	QLPHTCSRK						Carbamidomethyl (C)[6]						Mascot
		1154.6		1154.53	-0.0719	-62	852	860	SVQLRYNMK						Oxidation (M)[8]						Mascot
		1227.52		1227.59	0.072	59	1105	1114	KMEGEMSEMR												Mascot
		1245.65		1245.62	-0.0273	-22	146	156	TKPIAIEECNK												Mascot
		1263.6		1263.65	0.0508	40	699	709	MNKEGDNITNK												Mascot
		1263.6		1263.65	0.0508	40	699	709	MNKEGDNITNK												Mascot
		1279.59		1279.66	0.0624	49	699	709	MNKEGDNITNK						Oxidation (M)[1]						Mascot
		1285.56		1285.63	0.0642	50	857	865	YNMKEDWQR						Oxidation (M)[3]						Mascot
		1302.67		1302.65	-0.0206	-16	146	156	TKPIAIEECNK						Carbamidomethyl (C)[9]						Mascot
		1323.64		1323.66	0.0183	14	287	297	SMKEMQLPSTR						Oxidation (M)[2]						Mascot
		1427.8		1427.83	0.026	18	491	502	EVVPVTLSNWRK												Mascot
		1493.9		1493.76	-0.1397	-94	1188	1201	VIVHHVPLGPQAVK												Mascot
		1507.83		1507.73	-0.0951	-63	201	212	SKEILWTSIQFR												Mascot
		1511.87		1511.8	-0.0708	-47	91	105	SPLPSDSLASLALLK												Mascot
		1567.7		1567.76	0.058	37	906	917	SMHDWMNFVKEK						Oxidation (M)[2]						Mascot
		1567.7		1567.76	0.058	37	906	917	SMHDWMNFVKEK						Oxidation (M)[2]						Mascot
		1648.81		1648.79	-0.0235	-14	956	971	GCPDSSSVSRVAVWAK												Mascot
		1657.76		1657.82	0.0521	31	710	724	FFIDQSQNSMAAGNK												Mascot
		1796.97		1796.96	-0.0071	-4	203	216	EILWTSIQFRYNVK												Mascot
		1890.88		1890.95	0.078	41	639	655	DENPVNSQVTETLGMEK												Mascot
		2015.93		2015.98	0.0499	25	1106	1122	MEGEMSEMRSLMSQILK						Oxidation (M)[1]						Mascot
		2110.92		2110.99	0.0677	32	31	50	SLSVGLATTEDGNDGEM						Oxidation (M)[17]						Mascot
									NER
		2150.06		2150.08	0.0156	7	1209	1225	RSDAFLWRPNSEMHYIK												Mascot
Project 1\Sample project20170120\R17064-4				2150.08																of	42	Mascot	184
		2225.13		2225.12	-0.013	-6	119	138	SQNVGELVNVCEPSRQQ												Mascot
									LPK
		2369.07		2369.03	-0.0425	-18	561	579	MKPSNVQSMHDWMDFV						Oxidation (M)[1,9]						Mascot
									KEK
	4	PREDICTED: uncharacterized protein LOC101217008										XP_011650589.1			140037	9.53		25	47	0.265
		isoform X1 [Cucumis sativus]
		Protein Group
		PREDICTED: uncharacterized protein LOC101217008										XP_011650590.1			140037		9.5299
		isoform X1 [Cucumis sativus]															997329
																	7119
		Peptide Information
		Calc. Mass		Obsrv. Mass	± da	± ppm	Start	End	Sequence			Ion	C. I. %		Modification					Rank	Result Type
							Seq.	Seq.				Score
		856.493		856.535	0.0424	50	1205	1211	VWVDLPK												Mascot
		885.418		885.366	-0.0516	-58	668	674	CIYFDPK												Mascot
		1037.6		1037.54	-0.0631	-61	969	977	VAVWAKAHR												Mascot
		1122.52		1122.62	0.0976	87	958	968	KGCPDSSSVSR												Mascot
		1126.58		1126.54	-0.041	-36	939	947	QLPHTCSRK						Carbamidomethyl (C)[6]						Mascot
		1154.6		1154.53	-0.0719	-62	855	863	SVQLRYNMK						Oxidation (M)[8]						Mascot
		1227.52		1227.59	0.072	59	1108	1117	KMEGEMSEMR												Mascot
		1245.65		1245.62	-0.0273	-22	146	156	TKPIAIEECNK												Mascot
		1263.6		1263.65	0.0508	40	702	712	MNKEGDNITNK												Mascot
		1263.6		1263.65	0.0508	40	702	712	MNKEGDNITNK												Mascot
		1279.59		1279.66	0.0624	49	702	712	MNKEGDNITNK						Oxidation (M)[1]						Mascot
		1285.56		1285.63	0.0642	50	860	868	YNMKEDWQR						Oxidation (M)[3]						Mascot
		1302.67		1302.65	-0.0206	-16	146	156	TKPIAIEECNK						Carbamidomethyl (C)[9]						Mascot
		1323.64		1323.66	0.0183	14	287	297	SMKEMQLPSTR						Oxidation (M)[2]						Mascot
		1427.8		1427.83	0.026	18	494	505	EVVPVTLSNWRK												Mascot
		1493.9		1493.76	-0.1397	-94	1191	1204	VIVHHVPLGPQAVK												Mascot
		1507.83		1507.73	-0.0951	-63	201	212	SKEILWTSIQFR												Mascot
		1511.87		1511.8	-0.0708	-47	91	105	SPLPSDSLASLALLK												Mascot
		1567.7		1567.76	0.058	37	909	920	SMHDWMNFVKEK						Oxidation (M)[2]						Mascot
		1567.7		1567.76	0.058	37	909	920	SMHDWMNFVKEK						Oxidation (M)[2]						Mascot
		1648.81		1648.79	-0.0235	-14	959	974	GCPDSSSVSRVAVWAK												Mascot
		1657.76		1657.82	0.0521	31	713	727	FFIDQSQNSMAAGNK												Mascot
		1796.97		1796.96	-0.0071	-4	203	216	EILWTSIQFRYNVK												Mascot
		1890.88		1890.95	0.078	41	642	658	DENPVNSQVTETLGMEK												Mascot
		2015.93		2015.98	0.0499	25	1109	1125	MEGEMSEMRSLMSQILK						Oxidation (M)[1]						Mascot
Project 1\Sample project20170120\R17064-4																				of	43	184
		2110.92		2110.99	0.0677	32	31	50	SLSVGLATTEDGNDGEM						Oxidation (M)[17]						Mascot
									NER
		2150.06		2150.08	0.0156	7	1212	1228	RSDAFLWRPNSEMHYIK												Mascot
		2225.13		2225.12	-0.013	-6	119	138	SQNVGELVNVCEPSRQQ												Mascot
									LPK
		2369.07		2369.03	-0.0425	-18	564	582	MKPSNVQSMHDWMDFV						Oxidation (M)[1,9]						Mascot
									KEK
	5	PREDICTED: uncharacterized protein LOC101217008										XP_011650593.1			135676	9.51		25	46	0
		isoform X4 [Cucumis sativus]
		Peptide Information
		Calc. Mass		Obsrv. Mass	± da	± ppm	Start	End	Sequence			Ion	C. I. %		Modification					Rank	Result Type
							Seq.	Seq.				Score
		856.493		856.535	0.0424	50	1162	1168	VWVDLPK												Mascot
		885.418		885.366	-0.0516	-58	668	674	CIYFDPK												Mascot
		1037.6		1037.54	-0.0631	-61	969	977	VAVWAKAHR												Mascot
		1122.52		1122.62	0.0976	87	958	968	KGCPDSSSVSR												Mascot
		1126.58		1126.54	-0.041	-36	939	947	QLPHTCSRK						Carbamidomethyl (C)[6]						Mascot
		1154.6		1154.53	-0.0719	-62	855	863	SVQLRYNMK						Oxidation (M)[8]						Mascot
		1227.52		1227.59	0.072	59	1065	1074	KMEGEMSEMR												Mascot
		1245.65		1245.62	-0.0273	-22	146	156	TKPIAIEECNK												Mascot
		1263.6		1263.65	0.0508	40	702	712	MNKEGDNITNK												Mascot
		1263.6		1263.65	0.0508	40	702	712	MNKEGDNITNK												Mascot
		1279.59		1279.66	0.0624	49	702	712	MNKEGDNITNK						Oxidation (M)[1]						Mascot
		1285.56		1285.63	0.0642	50	860	868	YNMKEDWQR						Oxidation (M)[3]						Mascot
		1302.67		1302.65	-0.0206	-16	146	156	TKPIAIEECNK						Carbamidomethyl (C)[9]						Mascot
		1323.64		1323.66	0.0183	14	287	297	SMKEMQLPSTR						Oxidation (M)[2]						Mascot
		1427.8		1427.83	0.026	18	494	505	EVVPVTLSNWRK												Mascot
		1493.9		1493.76	-0.1397	-94	1148	1161	VIVHHVPLGPQAVK												Mascot
		1507.83		1507.73	-0.0951	-63	201	212	SKEILWTSIQFR												Mascot
		1511.87		1511.8	-0.0708	-47	91	105	SPLPSDSLASLALLK												Mascot
		1567.7		1567.76	0.058	37	909	920	SMHDWMNFVKEK						Oxidation (M)[2]						Mascot
		1567.7		1567.76	0.058	37	909	920	SMHDWMNFVKEK						Oxidation (M)[2]						Mascot
		1648.81		1648.79	-0.0235	-14	959	974	GCPDSSSVSRVAVWAK												Mascot
		1657.76		1657.82	0.0521	31	713	727	FFIDQSQNSMAAGNK												Mascot
		1796.97		1796.96	-0.0071	-4	203	216	EILWTSIQFRYNVK												Mascot
		1890.88		1890.95	0.078	41	642	658	DENPVNSQVTETLGMEK												Mascot
		2015.93		2015.98	0.0499	25	1066	1082	MEGEMSEMRSLMSQILK						Oxidation (M)[1]						Mascot
		2110.92		2110.99	0.0677	32	31	50	SLSVGLATTEDGNDGEM						Oxidation (M)[17]						Mascot
									NER
Project 1\Sample project20170120\R17064-4																				of	44	184
		2150.06		2150.08	0.0156	7	1169	1185	RSDAFLWRPNSEMHYIK												Mascot
		2225.13		2225.12	-0.013	-6	119	138	SQNVGELVNVCEPSRQQ												Mascot
									LPK
		2369.07		2369.03	-0.0425	-18	564	582	MKPSNVQSMHDWMDFV						Oxidation (M)[1,9]						Mascot
									KEK
	6	PREDICTED: uncharacterized protein LOC101217008										XP_011650594.1			135133	9.53		25	46	0
		isoform X5 [Cucumis sativus]
		Peptide Information
		Calc. Mass		Obsrv. Mass	± da	± ppm	Start	End	Sequence			Ion	C. I. %		Modification					Rank	Result Type
							Seq.	Seq.				Score
		856.493		856.535	0.0424	50	1157	1163	VWVDLPK												Mascot
		885.418		885.366	-0.0516	-58	668	674	CIYFDPK												Mascot
		1037.6		1037.54	-0.0631	-61	969	977	VAVWAKAHR												Mascot
		1122.52		1122.62	0.0976	87	958	968	KGCPDSSSVSR												Mascot
		1126.58		1126.54	-0.041	-36	939	947	QLPHTCSRK						Carbamidomethyl (C)[6]						Mascot
		1154.6		1154.53	-0.0719	-62	855	863	SVQLRYNMK						Oxidation (M)[8]						Mascot
		1227.52		1227.59	0.072	59	1060	1069	KMEGEMSEMR												Mascot
		1245.65		1245.62	-0.0273	-22	146	156	TKPIAIEECNK												Mascot
		1263.6		1263.65	0.0508	40	702	712	MNKEGDNITNK												Mascot
		1263.6		1263.65	0.0508	40	702	712	MNKEGDNITNK												Mascot
		1279.59		1279.66	0.0624	49	702	712	MNKEGDNITNK						Oxidation (M)[1]						Mascot
		1285.56		1285.63	0.0642	50	860	868	YNMKEDWQR						Oxidation (M)[3]						Mascot
		1302.67		1302.65	-0.0206	-16	146	156	TKPIAIEECNK						Carbamidomethyl (C)[9]						Mascot
		1323.64		1323.66	0.0183	14	287	297	SMKEMQLPSTR						Oxidation (M)[2]						Mascot
		1427.8		1427.83	0.026	18	494	505	EVVPVTLSNWRK												Mascot
		1493.9		1493.76	-0.1397	-94	1143	1156	VIVHHVPLGPQAVK												Mascot
		1507.83		1507.73	-0.0951	-63	201	212	SKEILWTSIQFR												Mascot
		1511.87		1511.8	-0.0708	-47	91	105	SPLPSDSLASLALLK												Mascot
		1567.7		1567.76	0.058	37	909	920	SMHDWMNFVKEK						Oxidation (M)[2]						Mascot
		1567.7		1567.76	0.058	37	909	920	SMHDWMNFVKEK						Oxidation (M)[2]						Mascot
		1648.81		1648.79	-0.0235	-14	959	974	GCPDSSSVSRVAVWAK												Mascot
		1657.76		1657.82	0.0521	31	713	727	FFIDQSQNSMAAGNK												Mascot
		1796.97		1796.96	-0.0071	-4	203	216	EILWTSIQFRYNVK												Mascot
		1890.88		1890.95	0.078	41	642	658	DENPVNSQVTETLGMEK												Mascot
		2015.93		2015.98	0.0499	25	1061	1077	MEGEMSEMRSLMSQILK						Oxidation (M)[1]						Mascot
		2110.92		2110.99	0.0677	32	31	50	SLSVGLATTEDGNDGEM						Oxidation (M)[17]						Mascot
									NER
		2150.06		2150.08	0.0156	7	1164	1180	RSDAFLWRPNSEMHYIK												Mascot
		2225.13		2225.12	-0.013	-6	119	138	SQNVGELVNVCEPSRQQ												Mascot
Project 1\Sample project20170120\R17064-4				2225.12																of	45	Mascot	184
									LPK
		2369.07		2369.03	-0.0425	-18	564	582	MKPSNVQSMHDWMDFV						Oxidation (M)[1,9]						Mascot
									KEK
	7	PREDICTED: ATP-dependent DNA helicase SRS2-like										XP_011654860.1			125223	8.17		20	44	0
		protein At4g25120 isoform X1 [Cucumis sativus]
		Protein Group
		PREDICTED: ATP-dependent DNA helicase SRS2-like										XP_011654861.1			125223		8.17
		protein At4g25120 isoform X1 [Cucumis sativus]															762
																	9395
		hypothetical protein Csa_5G168820 [Cucumis sativus]										KGN50345.1			125223		8.17
																	762
																	9395
		Peptide Information
		Calc. Mass		Obsrv. Mass	± da	± ppm	Start	End	Sequence			Ion	C. I. %		Modification					Rank	Result Type
							Seq.	Seq.				Score
		927.573		927.505	-0.0688	-74	335	342	RAIIEAVR												Mascot
		1122.65		1122.62	-0.0268	-24	868	876	RLLYVAMTR												Mascot
		1142.6		1142.53	-0.0639	-56	1049	1057	WEQIPADKR												Mascot
		1154.54		1154.53	-0.0131	-11	209	218	IGTMPEEYSK												Mascot
		1193.61		1193.64	0.0268	22	197	207	AELIISDSAMK						Oxidation (M)[10]						Mascot
		1219.61		1219.64	0.0316	26	1092	1102	NLGCTITPTSR						Carbamidomethyl (C)[4]						Mascot
		1277.7		1277.68	-0.0142	-11	219	228	YLLSLNDRQR												Mascot
		1298.63		1298.63	-0.0019	-1	208	218	KIGTMPEEYSK						Oxidation (M)[5]						Mascot
		1305.71		1305.68	-0.0253	-19	197	208	AELIISDSAMKK												Mascot
		1479.79		1479.81	0.0257	17	983	994	AVISHLFHQWNK												Mascot
		1497.86		1497.77	-0.0954	-64	336	348	AIIEAVRLLENEK												Mascot
		1657.78		1657.82	0.0383	23	2	16	IDDGNPGITDEERAR												Mascot
		1838.84		1838.94	0.1012	55	415	430	SCNALDYHDLISCSLK						Carbamidomethyl (C)[2]						Mascot
		1874.88		1874.94	0.0597	32	448	463	AIIVDEFQDTSSMQYK												Mascot
		1890.88		1890.95	0.074	39	448	463	AIIVDEFQDTSSMQYK						Oxidation (M)[13]						Mascot
		2016.01		2015.98	-0.0372	-18	229	249	EAACGDISIPLMILAGPGS						Oxidation (M)[12]						Mascot
									GK
		2210.15		2210.11	-0.0342	-15	295	313	MAKELVISTFHSFSLQLC												Mascot
									R
		2300.17		2300.16	-0.0122	-5	227	249	QREAACGDISIPLMILAGP						Oxidation (M)[14]						Mascot
									GSGK
		2369.26		2369.03	-0.2275	-96	903	922	EIPDHVREIQAEVSIQHLQ												Mascot
									K
		2721.49		2721.29	-0.1997	-73	79	104	VPLGEISVNTPLSNGLGL						Carbamidomethyl (C)[20]						Mascot
									DCLKTPVK
		2748.37		2748.34	-0.0376	-14	229	256	EAACGDISIPLMILAGPGS						Oxidation (M)[12]						Mascot
									GKTSTMVGR
		2764.37		2764.34	-0.0315	-11	229	256	EAACGDISIPLMILAGPGS						Oxidation (M)[12,25]						Mascot
									GKTSTMVGR
	8	PREDICTED: uncharacterized protein LOC101217008										XP_011650592.1			136565	9.49		24	44	0
Project 1\Sample project20170120\R17064-4																				of	46	184
		isoform X3 [Cucumis sativus]
		Peptide Information
		Calc. Mass		Obsrv. Mass	± da	± ppm	Start	End	Sequence			Ion	C. I. %		Modification					Rank	Result Type
							Seq.	Seq.				Score
		856.493		856.535	0.0424	50	1176	1182	VWVDLPK												Mascot
		885.418		885.366	-0.0516	-58	639	645	CIYFDPK												Mascot
		1037.6		1037.54	-0.0631	-61	940	948	VAVWAKAHR												Mascot
		1122.52		1122.62	0.0976	87	929	939	KGCPDSSSVSR												Mascot
		1126.58		1126.54	-0.041	-36	910	918	QLPHTCSRK						Carbamidomethyl (C)[6]						Mascot
		1154.6		1154.53	-0.0719	-62	826	834	SVQLRYNMK						Oxidation (M)[8]						Mascot
		1227.52		1227.59	0.072	59	1079	1088	KMEGEMSEMR												Mascot
		1245.65		1245.62	-0.0273	-22	146	156	TKPIAIEECNK												Mascot
		1263.6		1263.65	0.0508	40	673	683	MNKEGDNITNK												Mascot
		1263.6		1263.65	0.0508	40	673	683	MNKEGDNITNK												Mascot
		1279.59		1279.66	0.0624	49	673	683	MNKEGDNITNK						Oxidation (M)[1]						Mascot
		1285.56		1285.63	0.0642	50	831	839	YNMKEDWQR						Oxidation (M)[3]						Mascot
		1302.67		1302.65	-0.0206	-16	146	156	TKPIAIEECNK						Carbamidomethyl (C)[9]						Mascot
		1427.8		1427.83	0.026	18	465	476	EVVPVTLSNWRK												Mascot
		1493.9		1493.76	-0.1397	-94	1162	1175	VIVHHVPLGPQAVK												Mascot
		1507.83		1507.73	-0.0951	-63	201	212	SKEILWTSIQFR												Mascot
		1511.87		1511.8	-0.0708	-47	91	105	SPLPSDSLASLALLK												Mascot
		1567.7		1567.76	0.058	37	880	891	SMHDWMNFVKEK						Oxidation (M)[2]						Mascot
		1567.7		1567.76	0.058	37	880	891	SMHDWMNFVKEK						Oxidation (M)[2]						Mascot
		1648.81		1648.79	-0.0235	-14	930	945	GCPDSSSVSRVAVWAK												Mascot
		1657.76		1657.82	0.0521	31	684	698	FFIDQSQNSMAAGNK												Mascot
		1796.97		1796.96	-0.0071	-4	203	216	EILWTSIQFRYNVK												Mascot
		1890.88		1890.95	0.078	41	613	629	DENPVNSQVTETLGMEK												Mascot
		2015.93		2015.98	0.0499	25	1080	1096	MEGEMSEMRSLMSQILK						Oxidation (M)[1]						Mascot
		2110.92		2110.99	0.0677	32	31	50	SLSVGLATTEDGNDGEM						Oxidation (M)[17]						Mascot
									NER
		2150.06		2150.08	0.0156	7	1183	1199	RSDAFLWRPNSEMHYIK												Mascot
		2225.13		2225.12	-0.013	-6	119	138	SQNVGELVNVCEPSRQQ												Mascot
									LPK
		2369.07		2369.03	-0.0425	-18	535	553	MKPSNVQSMHDWMDFV						Oxidation (M)[1,9]						Mascot
									KEK
	9	PREDICTED: ATP-dependent DNA helicase SRS2-like										XP_011654862.1			123175	8.05		19	41	0
		protein At4g25120 isoform X2 [Cucumis sativus]
		Peptide Information
Project 1\Sample project20170120\R17064-4																				of	47	184
		Calc. Mass		Obsrv. Mass	± da	± ppm	Start	End	Sequence			Ion	C. I. %		Modification					Rank	Result Type
							Seq.	Seq.				Score
		927.573		927.505	-0.0688	-74	335	342	RAIIEAVR												Mascot
		1122.65		1122.62	-0.0268	-24	868	876	RLLYVAMTR												Mascot
		1154.54		1154.53	-0.0131	-11	209	218	IGTMPEEYSK												Mascot
		1193.61		1193.64	0.0268	22	197	207	AELIISDSAMK						Oxidation (M)[10]						Mascot
		1219.61		1219.64	0.0316	26	1075	1085	NLGCTITPTSR						Carbamidomethyl (C)[4]						Mascot
		1277.7		1277.68	-0.0142	-11	219	228	YLLSLNDRQR												Mascot
		1298.63		1298.63	-0.0019	-1	208	218	KIGTMPEEYSK						Oxidation (M)[5]						Mascot
		1305.71		1305.68	-0.0253	-19	197	208	AELIISDSAMKK												Mascot
		1479.79		1479.81	0.0257	17	983	994	AVISHLFHQWNK												Mascot
		1497.86		1497.77	-0.0954	-64	336	348	AIIEAVRLLENEK												Mascot
		1657.78		1657.82	0.0383	23	2	16	IDDGNPGITDEERAR												Mascot
		1838.84		1838.94	0.1012	55	415	430	SCNALDYHDLISCSLK						Carbamidomethyl (C)[2]						Mascot
		1874.88		1874.94	0.0597	32	448	463	AIIVDEFQDTSSMQYK												Mascot
		1890.88		1890.95	0.074	39	448	463	AIIVDEFQDTSSMQYK						Oxidation (M)[13]						Mascot
		2016.01		2015.98	-0.0372	-18	229	249	EAACGDISIPLMILAGPGS						Oxidation (M)[12]						Mascot
									GK
		2210.15		2210.11	-0.0342	-15	295	313	MAKELVISTFHSFSLQLC												Mascot
									R
		2300.17		2300.16	-0.0122	-5	227	249	QREAACGDISIPLMILAGP						Oxidation (M)[14]						Mascot
									GSGK
		2369.26		2369.03	-0.2275	-96	903	922	EIPDHVREIQAEVSIQHLQ												Mascot
									K
		2721.49		2721.29	-0.1997	-73	79	104	VPLGEISVNTPLSNGLGL						Carbamidomethyl (C)[20]						Mascot
									DCLKTPVK
		2748.37		2748.34	-0.0376	-14	229	256	EAACGDISIPLMILAGPGS						Oxidation (M)[12]						Mascot
									GKTSTMVGR
		2764.37		2764.34	-0.0315	-11	229	256	EAACGDISIPLMILAGPGS						Oxidation (M)[12,25]						Mascot
									GKTSTMVGR
	10	hypothetical protein Csa_3G176240 [Cucumis sativus]										KGN57277.1			14820.3	5.89		7	40	0
		Peptide Information
		Calc. Mass		Obsrv. Mass	± da	± ppm	Start	End	Sequence			Ion	C. I. %		Modification					Rank	Result Type
							Seq.	Seq.				Score
		1107.51		1107.56	0.0482	44	96	106	DISGGEAMGVR						Oxidation (M)[8]						Mascot
		1118.6		1118.53	-0.065	-58	2	10	QISYPINQR												Mascot
		1125.46		1125.54	0.0874	78	131	141	AGTCLDGIGMD						Carbamidomethyl (C)[4], Oxidation (M)[10]						Mascot
		1219.61		1219.64	0.0316	26	96	107	DISGGEAMGVRK												Mascot
		1227.57		1227.59	0.0173	14	72	83	HLGNGSSEGVDR												Mascot
		1249.64		1249.63	-0.005	-4	1	10	MQISYPINQR												Mascot
		2471.17		2471.32	0.1548	63	49	71	QSGANPCLNITHCEVEIG												Mascot
Project 1\Sample project20170120\R17064-4				2471.32																of	48	Mascot	184
									STELR
Project 1\Sample project20170120\R17064-4																				of	49	184
Gel Idx/Pos			276/L4						Instr./Gel Origin		BA2151/Sample Project 20170120						Process Status			Analysis Succeeded
Plate [#] Name			[1] Sample Project 20170120						Instrument Sample Name								Spectra			11
Rank		Protein Name						Species				Accession No.			Protein MW		Protein	Pep.	Protein	Protein	Total Ion	Total Ion
																	PI	Count	Score	Score	Score	C. I. %
																				C. I. %
	1	hypothetical protein Csa_1G479610 [Cucumis sativus]										KGN65655.1			27377.8	5.43		15	716	100	617	100
		Protein Group
		L-ascorbate peroxidase, cytosolic-like [Cucumis sativus]										NP_001267635.1			27377.8		5.4299
																	998283
																	3862
		ascorbate peroxidase, partial [Cucumis sativus]										AAQ88015.1			27343.8		5.4299
																	998283
																	3862
		cytosolic ascorbate peroxidase [Cucumis sativus]										BAA13671.1			27377.8		5.4299
																	998283
																	3862
		unnamed protein product [Cucumis sativus]										CBC70072.1			27377.8		5.4299
																	998283
																	3862
		unnamed protein product [Cucumis sativus]										CBC89222.1			27377.8		5.4299
																	998283
																	3862
		unnamed protein product [Cucumis sativus]										CBD24439.1			27377.8		5.4299
																	998283
																	3862
		unnamed protein product [Cucumis sativus]										CBB98557.1			27377.8		5.4299
																	998283
																	3862
		unnamed protein product [Cucumis sativus]										CAW75806.1			27377.8		5.4299
																	998283
																	3862
		unnamed protein product [Cucumis sativus]										CAW86407.1			27377.8		5.4299
																	998283
																	3862
		unnamed protein product [Cucumis sativus]										CAW32442.1			27377.8		5.4299
																	998283
																	3862
		Peptide Information
		Calc. Mass		Obsrv. Mass	± da	± ppm	Start	End	Sequence			Ion	C. I. %		Modification					Rank	Result Type
							Seq.	Seq.				Score
[truncated: 5,564 more rows]
[truncated: 1 more columns]
