# Supplementary material for: The role and proteomic analysis of ethylene in hydrogen gas-induced adventitious rooting development in cucumber (Cucumis sativus L.) explants
Source: PeerJ. 2020 Apr 7;8:e8896. doi: 10.7717/peerj.8896 (PMC7147439; doi:10.7717/peerj.8896)
Supplement: Supplemental Information 11 [file peerj-08-8896-s017.xlt]

## Sheet: Sheet1
Analysis Information
	Report Type			Protein-Peptide Summary by Spot						Analysis Type			Combined (MS+MS/MS)
	Sample Set Name			Sample project20170120						Database			NCBI_cucumis_sat
	Analysis Name			R17064-6						Creation Date			02/24/2017 18:31:06
	Reported By			02/27/2017 13:12:06 - admin						Last Modified			02/24/2017 18:33:37
		MS Acq. : Proc. Methods				(Unspecified) : (Unspecified)
		Interpretation Method				(Unspecified)
Gel Idx/Pos			313/M15						Instr./Gel Origin		BA2151/Sample Project 20170120					Process Status			Analysis Succeeded
Plate [#] Name			[1] Sample Project 20170120						Instrument Sample Name							Spectra			11
Rank		Protein Name						Species				Accession No.		Protein MW		Protein	Pep.	Protein	Protein		Total Ion	Total Ion
																PI	Count	Score	Score		Score	C. I. %
																			C. I. %
	1	hypothetical protein Csa_6G147530 [Cucumis sativus]										KGN46860.1		61399.9	5.06		26	401	100		256	100
		Protein Group
		PREDICTED: ruBisCO large subunit-binding protein										XP_004145754.1		61399.9		5.0599
		subunit alpha [Cucumis sativus]														999427
																7954
		Peptide Information
		Calc. Mass		Obsrv. Mass	± da	± ppm	Start	End	Sequence			Ion	C. I. %	Modification						Rank	Result Type
							Seq.	Seq.				Score
		816.482		816.484	0.0015	2	262	268	VLITDQK												Mascot
		940.571		940.571	-0.0003	0	274	281	DIIPILEK												Mascot
		1028.57		1028.58	0.0055	5	253	261	LIAELENAR												Mascot
		1028.57		1028.58	0.0055	5	253	261	LIAELENAR												Mascot
		1043.58		1043.59	0.0052	5	91	100	VVNDGVTIAR												Mascot
		1052.5		1052.51	0.0098	9	48	56	EIAFDQSSR												Mascot
		1052.5		1052.51	0.0098	9	48	56	EIAFDQSSR			0	0								Mascot
		1181.7		1181.71	0.0122	10	66	77	LANAVGLTLGPR												Mascot
		1204.62		1204.62	0.003	2	80	90	NVVLDEFGSPK												Mascot
		1258.69		1258.69	0.0019	2	165	175	TVQGLIEELEK												Mascot
		1290.62		1290.63	0.0091	7	423	434	VGAATETELEDR												Mascot
		1479.75		1479.76	0.0086	6	240	252	GYISPQFVTNPEK												Mascot
		1479.75		1479.76	0.0086	6	240	252	GYISPQFVTNPEK			61	99.993								Mascot
Project 1\Sample project20170120\R17064-6																				1	of	73
		1499.67		1499.67	-0.0043	-3	394	406	ELAETDSVYDTEK												Mascot
		1517.78		1517.77	-0.0169	-11	529	542	YENLVEAGVIDPAK												Mascot
		1582.92		1582.91	-0.0026	-2	144	159	LGLLNVTSGANPVSLK												Mascot
		1636.78		1636.78	0.0064	4	123	139	TNDSAGDGTTTASVLAR												Mascot
		1739.02		1739.01	-0.0098	-6	144	160	LGLLNVTSGANPVSLKR												Mascot
		1796.92		1796.92	0.0015	1	101	117	AIELPDPMENAGAALIR					Oxidation (M)[8]							Mascot
		1796.92		1796.92	0.0015	1	101	117	AIELPDPMENAGAALIR			46	99.751	Oxidation (M)[8]							Mascot
		1918.97		1918.98	0.0062	3	370	387	DTTTIIADAASKDELQAR												Mascot
		1918.97		1918.98	0.0062	3	370	387	DTTTIIADAASKDELQAR												Mascot
		1968.94		1969.03	0.0886	45	394	410	ELAETDSVYDTEKLAER												Mascot
		2095.19		2095.2	0.0083	4	57	77	TALQSGIDKLANAVGLTL												Mascot
									GPR
		2245.17		2245.15	-0.022	-10	188	210	AVASISAGNDELIGLMIAD					Oxidation (M)[16]							Mascot
									AIGK
		2250.3		2250.28	-0.0171	-8	287	308	APLLIIAEDVTGEALATLV												Mascot
									VNK
		2250.3		2250.28	-0.0171	-8	287	308	APLLIIAEDVTGEALATLV			69	99.999								Mascot
									VNK
		2278.27		2278.25	-0.0154	-7	490	512	ALVAPASLIAQNAGIEGE												Mascot
									VVVEK
		2840.54		2840.52	-0.0215	-8	546	572	CALQNAASVAGMVLTTQ					Carbamidomethyl (C)[1], Oxidation (M)[12]							Mascot
									AIVVEKPKPK
		2916.62		2916.63	0.01	3	443	472	NATFAAIEEGIVPGGGAA												Mascot
									LVHLSTLVPAIK
		2916.62		2916.63	0.01	3	443	472	NATFAAIEEGIVPGGGAA			32	94.103								Mascot
									LVHLSTLVPAIK
		3042.41		3042.42	0.0141	5	211	239	VGPDGVLSIESSSSFETT					Oxidation (M)[25]							Mascot
									VDVEEGMAIDR
		3042.41		3042.42	0.0141	5	211	239	VGPDGVLSIESSSSFETT			47	99.815	Oxidation (M)[25]							Mascot
									VDVEEGMAIDR
		3757.97		3757.99	0.0269	7	329	363	AMLQDIAILTGAEFQAND					Oxidation (M)[2]							Mascot
									LGLLVENTTIEQLGLAR
	2	hypothetical protein Csa_4G638520 [Cucumis sativus]										KGN55162.1		26466.5	9.56		9	36	0
		Protein Group
		PREDICTED: protein MIZU-KUSSEI 1 [Cucumis										XP_004141242.1		26466.5		9.56
		sativus]														4196
																167
		Peptide Information
		Calc. Mass		Obsrv. Mass	± da	± ppm	Start	End	Sequence			Ion	C. I. %	Modification						Rank	Result Type
							Seq.	Seq.				Score
		870.483		870.548	0.0644	74	155	161	KIGYSFR												Mascot
		934.466		934.399	-0.0667	-71	120	127	EMASDILR												Mascot
		1028.6		1028.58	-0.0244	-24	63	71	MVALLGRPR					Oxidation (M)[1]							Mascot
		1028.6		1028.58	-0.0244	-24	63	71	MVALLGRPR					Oxidation (M)[1]							Mascot
		1443.72		1443.79	0.0693	48	77	89	DNATTGTIFGYRK												Mascot
		1567.75		1567.75	-0.0001	0	194	206	DNLEGELTYMRAR												Mascot
Project 1\Sample project20170120\R17064-6				1567.75																2	Mascot	of	73
		1732.78		1732.9	0.117	68	141	154	VMEEFLWAVYCNGR					Oxidation (M)[2]							Mascot
		2129.09		2129.01	-0.0799	-38	2	20	PSLHSSPFMDNSAFLPLL												Mascot
									R
		2179.15		2179.13	-0.0237	-11	53	71	LFPMLTSGCKMVALLGR					Carbamidomethyl (C)[9], Oxidation (M)[4,11]							Mascot
									PR
		2840.34		2840.52	0.1717	60	178	204	GVSMGAGVLPSPASEKD					Oxidation (M)[4,26]							Mascot
									NLEGELTYMR
	3	PREDICTED: phosphoethanolamine										XP_004137341.1		57045.7	5.93		13	31	0
		N-methyltransferase-like [Cucumis sativus]
		Peptide Information
		Calc. Mass		Obsrv. Mass	± da	± ppm	Start	End	Sequence			Ion	C. I. %	Modification						Rank	Result Type
							Seq.	Seq.				Score
		837.352		837.302	-0.0502	-60	236	242	KCSNDDR												Mascot
		940.489		940.571	0.0824	88	184	190	EPRFYTK												Mascot
		1011.52		1011.54	0.0239	24	388	395	ILISDYCK					Carbamidomethyl (C)[7]							Mascot
		1052.53		1052.51	-0.0201	-19	214	222	CIGAYARNK					Carbamidomethyl (C)[1]							Mascot
		1052.53		1052.51	-0.0201	-19	214	222	CIGAYARNK					Carbamidomethyl (C)[1]							Mascot
		1499.69		1499.67	-0.0164	-11	337	349	CAVEFEVADCTKK					Carbamidomethyl (C)[1]							Mascot
		1501.78		1501.72	-0.0563	-37	243	254	GFQRFLDTVQYK												Mascot
		1517.73		1517.77	0.036	24	224	234	NQNQICWIWQK					Carbamidomethyl (C)[6]							Mascot
		1699.88		1699.83	-0.0574	-34	247	260	FLDTVQYKCSGILR					Carbamidomethyl (C)[9]							Mascot
		1732.89		1732.9	0.0087	5	349	362	KVYLDNTFDVIYSR												Mascot
		1738.85		1739.01	0.1574	91	106	120	NVKFMCADVTSPELK					Carbamidomethyl (C)[6]							Mascot
		1796.89		1796.92	0.0304	17	332	348	AIGLKCAVEFEVADCTK												Mascot
		1796.89		1796.92	0.0304	17	332	348	AIGLKCAVEFEVADCTK												Mascot
		2095.09		2095.2	0.1101	53	1	19	MATPTPAPALNDEERLIQ												Mascot
									K
		3024.32		3024.49	0.1722	57	194	220	ECHMQDESGDSYELSLV												Mascot
									GYKCIGAYAR
	4	PREDICTED: pentatricopeptide repeat-containing										XP_011658903.1		90763.4	6.83		10	30	0		16	0
		protein At2g15690-like [Cucumis sativus]
		Peptide Information
		Calc. Mass		Obsrv. Mass	± da	± ppm	Start	End	Sequence			Ion	C. I. %	Modification						Rank	Result Type
							Seq.	Seq.				Score
		883.34		883.303	-0.0368	-42	498	505	CGSMSDAR					Carbamidomethyl (C)[1]							Mascot
		890.281		890.35	0.069	78	789	795	CSCGDYW					Carbamidomethyl (C)[1]							Mascot
		998.414		998.422	0.0076	8	498	506	CGSMSDARR					Oxidation (M)[4]							Mascot
		1468.69		1468.74	0.0435	30	23	34	YPLSSCFTFTFR												Mascot
		1690.78		1690.89	0.1087	64	754	767	ICGDCHNAIKIMSR					Carbamidomethyl (C)[2,5], Oxidation (M)[12]							Mascot
Project 1\Sample project20170120\R17064-6																				3	of	73
		1796.85		1796.92	0.0742	41	483	497	SDLQLNNEVLEMYGR					Oxidation (M)[12]							Mascot
		1796.85		1796.92	0.0742	41	483	497	SDLQLNNEVLEMYGR			16	0	Oxidation (M)[12]							Mascot
		1813.07		1812.9	-0.1659	-92	731	747	LAIAYGLISTPARTPLR												Mascot
		2179.07		2179.13	0.0635	29	444	462	QGVKADVDCFHLLFELC					Carbamidomethyl (C)[9]							Mascot
									GK
		2194.12		2194.14	0.0142	6	409	428	DGTQNQAPNALVSPIDEL												Mascot
									RR
		2245.04		2245.15	0.1171	52	507	524	VFDHMPDRSIDSWHLMM												Mascot
									K
	5	hypothetical protein Csa_7G073730 [Cucumis sativus]										KGN43937.1		98123.7	7.04		10	29	0		16	0
		Peptide Information
		Calc. Mass		Obsrv. Mass	± da	± ppm	Start	End	Sequence			Ion	C. I. %	Modification						Rank	Result Type
							Seq.	Seq.				Score
		883.34		883.303	-0.0368	-42	562	569	CGSMSDAR					Carbamidomethyl (C)[1]							Mascot
		890.281		890.35	0.069	78	853	859	CSCGDYW					Carbamidomethyl (C)[1]							Mascot
		998.414		998.422	0.0076	8	562	570	CGSMSDARR					Oxidation (M)[4]							Mascot
		1468.69		1468.74	0.0435	30	23	34	YPLSSCFTFTFR												Mascot
		1690.78		1690.89	0.1087	64	818	831	ICGDCHNAIKIMSR					Carbamidomethyl (C)[2,5], Oxidation (M)[12]							Mascot
		1796.85		1796.92	0.0742	41	547	561	SDLQLNNEVLEMYGR					Oxidation (M)[12]							Mascot
		1796.85		1796.92	0.0742	41	547	561	SDLQLNNEVLEMYGR			16	0	Oxidation (M)[12]							Mascot
		1813.07		1812.9	-0.1659	-92	795	811	LAIAYGLISTPARTPLR												Mascot
		2179.07		2179.13	0.0635	29	508	526	QGVKADVDCFHLLFELC					Carbamidomethyl (C)[9]							Mascot
									GK
		2194.12		2194.14	0.0142	6	473	492	DGTQNQAPNALVSPIDEL												Mascot
									RR
		2245.04		2245.15	0.1171	52	571	588	VFDHMPDRSIDSWHLMM												Mascot
									K
	6	PREDICTED: 50S ribosomal protein L11, chloroplastic										XP_004145879.2		24569.2	9.82		7	29	0
		[Cucumis sativus]
		Peptide Information
		Calc. Mass		Obsrv. Mass	± da	± ppm	Start	End	Sequence			Ion	C. I. %	Modification						Rank	Result Type
							Seq.	Seq.				Score
		841.482		841.54	0.0581	69	147	153	SFTFVLK												Mascot
		998.48		998.422	-0.058	-58	114	122	GVNIMAFCK					Oxidation (M)[5]							Mascot
		1028.58		1028.58	-0.0019	-2	68	77	LSVVSMAPPK												Mascot
		1028.58		1028.58	-0.0019	-2	68	77	LSVVSMAPPK												Mascot
		1582.9		1582.91	0.0152	10	68	83	LSVVSMAPPKAKPGGK					Oxidation (M)[6]							Mascot
		1636.77		1636.78	0.0167	10	195	208	LPDLNCTTIESAMR					Carbamidomethyl (C)[6], Oxidation (M)[13]							Mascot
		2250.11		2250.28	0.1682	75	189	208	TIAAEKLPDLNCTTIESAM					Carbamidomethyl (C)[12], Oxidation (M)[19]							Mascot
									R
		2250.11		2250.28	0.1682	75	189	208	TIAAEKLPDLNCTTIESAM					Carbamidomethyl (C)[12], Oxidation (M)[19]							Mascot
Project 1\Sample project20170120\R17064-6				2250.28																4	Mascot	of	73
									R
		2300.17		2300.2	0.0271	12	22	44	ISASSNRLSSPFLTSSSS												Mascot
									GLSSK
	7	hypothetical protein Csa_5G642190 [Cucumis sativus]										KGN52537.1		68566.1	8.94		12	27	0
		Protein Group
		PREDICTED: pentatricopeptide repeat-containing										XP_004141597.1		68566.1		8.9399
		protein At3g29290 [Cucumis sativus]														995803
																833
		Peptide Information
		Calc. Mass		Obsrv. Mass	± da	± ppm	Start	End	Sequence			Ion	C. I. %	Modification						Rank	Result Type
							Seq.	Seq.				Score
		870.588		870.548	-0.0407	-47	155	161	RILILSR												Mascot
		880.46		880.38	-0.0798	-91	347	353	VFQDMLK												Mascot
		1043.59		1043.59	-0.0021	-2	569	577	ALMLQNLPK					Oxidation (M)[3]							Mascot
		1468.75		1468.74	-0.0106	-7	411	422	YSDAIHLFEFVK												Mascot
		1501.8		1501.72	-0.0741	-49	35	46	LRQCINVNPMLK					Carbamidomethyl (C)[4], Oxidation (M)[10]							Mascot
		1567.74		1567.75	0.0111	7	303	315	CNQNELAIDTYVK					Carbamidomethyl (C)[1]							Mascot
		1699.91		1699.83	-0.0825	-49	373	387	AKEVTLAFSVYNVMK												Mascot
		1969.07		1969.03	-0.0404	-21	480	495	KPEIALQVYERMVHQK												Mascot
		2250.16		2250.28	0.1165	52	424	442	EKVQLNIHIYNTILMSCSK					Oxidation (M)[15]							Mascot
		2250.16		2250.28	0.1165	52	424	442	EKVQLNIHIYNTILMSCSK					Oxidation (M)[15]							Mascot
		2272.07		2272.27	0.1997	88	47	65	SWMRCTIMYDGNAVSVL					Carbamidomethyl (C)[5], Oxidation (M)[3]							Mascot
									PR
		2823.45		2823.51	0.0559	20	347	372	VFQDMLKCGLQPNSVSF					Oxidation (M)[5]							Mascot
									NALINALGK
		2840.36		2840.52	0.159	56	243	267	AWEHQCVLAQFDAIVYN												Mascot
									TMISICGK
	8	hypothetical protein Csa_1G001390 [Cucumis sativus]										KGN63467.1		63176	4.53		11	26	0
		Protein Group
		PREDICTED: SWI/SNF complex subunit SWI3A										XP_004138253.1		63176		4.53
		isoform X1 [Cucumis sativus]														2098
																835
		Peptide Information
		Calc. Mass		Obsrv. Mass	± da	± ppm	Start	End	Sequence			Ion	C. I. %	Modification						Rank	Result Type
							Seq.	Seq.				Score
		806.361		806.297	-0.0639	-79	203	208	YHQCAK					Carbamidomethyl (C)[4]							Mascot
		998.442		998.422	-0.0207	-21	236	243	TTEFTEDR												Mascot
		1479.69		1479.76	0.07	47	189	202	ILVCGNCGQLCGSR					Carbamidomethyl (C)[4]							Mascot
		1479.69		1479.76	0.07	47	189	202	ILVCGNCGQLCGSR					Carbamidomethyl (C)[4]							Mascot
		1501.84		1501.72	-0.1138	-76	544	557	VSVLQSAFDLGIPR												Mascot
		1636.66		1636.78	0.1218	74	209	222	DDYSICENCFKDGK												Mascot
Project 1\Sample project20170120\R17064-6				1636.78																5	Mascot	of	73
		1812.86		1812.9	0.0457	25	362	377	RQCTASIQDTSSSLMK					Carbamidomethyl (C)[3]							Mascot
		1940.94		1940.9	-0.0407	-21	288	304	FVELPFGDSLLCSETQR												Mascot
		1968.98		1969.03	0.0509	26	265	281	HGDDWELVAQNVQTKTK												Mascot
		1972.98		1972.98	-0.0003	0	495	510	EMEYLLGIMIETQMKK					Oxidation (M)[2]							Mascot
		1985.97		1985.99	0.0173	9	228	243	LLEDFELKTTEFTEDR												Mascot
		2267.03		2267.16	0.1304	58	189	208	ILVCGNCGQLCGSRYHQ					Carbamidomethyl (C)[4,7]							Mascot
									CAK
	9	hypothetical protein Csa_1G397130 [Cucumis sativus]										KGN65383.1		20402.9	5.15		6	26	0
		Peptide Information
		Calc. Mass		Obsrv. Mass	± da	± ppm	Start	End	Sequence			Ion	C. I. %	Modification						Rank	Result Type
							Seq.	Seq.				Score
		1028.53		1028.58	0.0443	43	83	91	AVMGWPPVR					Oxidation (M)[3]							Mascot
		1028.53		1028.58	0.0443	43	83	91	AVMGWPPVR					Oxidation (M)[3]							Mascot
		1052.56		1052.51	-0.0453	-43	160	167	LFIESCKR					Carbamidomethyl (C)[6]							Mascot
		1052.56		1052.51	-0.0453	-43	160	167	LFIESCKR					Carbamidomethyl (C)[6]							Mascot
		1499.7		1499.67	-0.0308	-21	135	146	RADEYLPTYEDK												Mascot
		1517.71		1517.77	0.0584	38	147	159	DGDWMLVGDVPWK												Mascot
		1812.75		1812.9	0.1516	84	65	81	DSLDDEPPHGSSGNEEK												Mascot
		1968.85		1969.03	0.1753	89	65	82	DSLDDEPPHGSSGNEEK												Mascot
									R
	10	hypothetical protein Csa_1G045710 [Cucumis sativus]										KGN64273.1		42572.7	5.87		9	25	0
		Protein Group
		PREDICTED: polynucleotide 5'-hydroxyl-kinase NOL9										XP_004152451.1		42572.7		5.8699
		[Cucumis sativus]														998855
																5908
		Peptide Information
		Calc. Mass		Obsrv. Mass	± da	± ppm	Start	End	Sequence			Ion	C. I. %	Modification						Rank	Result Type
							Seq.	Seq.				Score
		808.358		808.283	-0.0753	-93	220	225	QDEFNR												Mascot
		816.407		816.484	0.0768	94	241	246	IMAYFR					Oxidation (M)[2]							Mascot
		1011.61		1011.54	-0.068	-67	55	62	HLLNVFLR												Mascot
		1578.93		1578.81	-0.1163	-74	150	163	IELPLIVNTPGWVK												Mascot
		1690.79		1690.89	0.1015	60	104	117	TPERCFFFGDISSK					Carbamidomethyl (C)[5]							Mascot
		1699.75		1699.83	0.0774	46	365	379	GCISPYMCANILPTS					Carbamidomethyl (C)[2,8], Oxidation (M)[7]							Mascot
		2225.05		2225.14	0.0835	38	119	136	DPKAYLSYANTLYDYYHK												Mascot
		2250.27		2250.28	0.0042	2	144	163	TEELAKIELPLIVNTPGWV												Mascot
									K
		2250.27		2250.28	0.0042	2	144	163	TEELAKIELPLIVNTPGWV												Mascot
									K
Project 1\Sample project20170120\R17064-6																				6	of	73
		2978.55		2978.61	0.0603	20	66	92	KVVYLDSDVGQPEFTPP												Mascot
									GFLSLTVVDR
Project 1\Sample project20170120\R17064-6																				7	of	73
Gel Idx/Pos			314/M16						Instr./Gel Origin		BA2151/Sample Project 20170120					Process Status			Analysis Succeeded
Plate [#] Name			[1] Sample Project 20170120						Instrument Sample Name							Spectra			11
Rank		Protein Name						Species				Accession No.		Protein MW		Protein	Pep.	Protein	Protein		Total Ion	Total Ion
																PI	Count	Score	Score		Score	C. I. %
																			C. I. %
	1	hypothetical protein Csa_1G065980 [Cucumis sativus]										KGN64578.1		89435.7	6.75		19	51	59.37
		Protein Group
		PREDICTED: kinesin-1 [Cucumis sativus]										XP_004154168.1		89435.7		6.75
		Peptide Information
		Calc. Mass		Obsrv. Mass	± da	± ppm	Start	End	Sequence			Ion	C. I. %	Modification						Rank	Result Type
							Seq.	Seq.				Score
		817.441		817.385	-0.0562	-69	596	603	TENGVLGK												Mascot
		1021.54		1021.53	-0.0016	-2	437	444	GNIRVFCR					Carbamidomethyl (C)[7]							Mascot
		1024.5		1024.52	0.0183	18	656	663	SHFVFTMR												Mascot
		1112.55		1112.49	-0.0592	-53	17	26	DVPDDVPLDK												Mascot
		1187.7		1187.67	-0.032	-27	280	289	TLQEQLKSLK												Mascot
		1273.67		1273.71	0.043	34	308	317	CLREELQQVR												Mascot
		1380.67		1380.7	0.0307	22	164	175	DNVASLEEKMTK					Oxidation (M)[10]							Mascot
		1381.64		1381.69	0.0464	34	141	151	CSAIELEMKER					Carbamidomethyl (C)[1], Oxidation (M)[8]							Mascot
		1439.76		1439.82	0.0551	38	630	642	EISSLLQQAAHSR												Mascot
		1450.79		1450.74	-0.0538	-37	596	608	TENGVLGKQYTIK												Mascot
		1479.7		1479.82	0.1267	86	643	655	SVGRTQMNEQSSR												Mascot
		1516.81		1516.78	-0.0211	-14	770	783	FAARVNACEIGIPR												Mascot
		1792.93		1792.97	0.0392	22	260	275	VGMEKMTVVENLSTVR												Mascot
		1824.92		1824.95	0.027	15	260	275	VGMEKMTVVENLSTVR					Oxidation (M)[3,6]							Mascot
		1838.98		1838.95	-0.0324	-18	630	646	EISSLLQQAAHSRSVGR												Mascot
		1841.91		1841.98	0.0692	38	231	245	RAQEYNISLQQYNSK												Mascot
		1841.91		1841.98	0.0692	38	231	245	RAQEYNISLQQYNSK												Mascot
		1880.88		1880.96	0.0883	47	355	370	TNSLEETCSSQREQIR												Mascot
		2409.18		2409.22	0.041	17	748	769	TLMFVNISPDPSSVNESL												Mascot
									CSLR
		2591.16		2591.39	0.2283	88	344	366	SCIELDSLTMKTNSLEET					Oxidation (M)[10]							Mascot
									CSSQR
		2911.44		2911.55	0.1042	36	748	773	TLMFVNISPDPSSVNESL					Carbamidomethyl (C)[19]							Mascot
									CSLRFAAR
	2	hypothetical protein Csa_2G035460 [Cucumis sativus]										KGN61046.1		50285.8	4.88		12	49	34.106		10	0
		Protein Group
Project 1\Sample project20170120\R17064-6																				8	of	73
		PREDICTED: leucine aminopeptidase 3,										XP_011650115.1		50285.8		4.88
		chloroplastic-like [Cucumis sativus]														1144
																4092
		Peptide Information
		Calc. Mass		Obsrv. Mass	± da	± ppm	Start	End	Sequence			Ion	C. I. %	Modification						Rank	Result Type
							Seq.	Seq.				Score
		843.505		843.537	0.0319	38	85	92	SGQAIVLR												Mascot
		1024.51		1024.52	0.0157	15	193	201	NYSDVLSAR												Mascot
		1271.63		1271.65	0.02	16	252	263	GITFDSGGYNLK												Mascot
		1380.67		1380.7	0.0267	19	202	212	IFNEDEIIEMK												Mascot
		1381.76		1381.69	-0.0673	-49	100	112	RVGLFGVGQSAYK												Mascot
		1396.67		1396.7	0.0344	25	202	212	IFNEDEIIEMK					Oxidation (M)[10]							Mascot
		1513.69		1513.74	0.0565	37	404	415	LPIEESYWDSMK					Oxidation (M)[11]							Mascot
		1673.92		1673.91	-0.0074	-4	5	21	IPPTLGLTNPGPSNAPK												Mascot
		1744.93		1744.97	0.0359	21	113	131	AAAFVGLGEAIAAAAQAS												Mascot
									R
		1744.93		1744.97	0.0359	21	113	131	AAAFVGLGEAIAAAAQAS			10	0								Mascot
									R
		1792.98		1792.97	-0.0157	-9	463	479	SVATGFGVSTLVEWVLK												Mascot
		1839		1838.95	-0.0503	-27	246	263	LGLVGKGITFDSGGYNLK												Mascot
		1861.97		1861.97	-0.0004	0	47	62	DVVKDDNNNFTNLLLK												Mascot
		2236.13		2236.15	0.0193	9	63	84	KLDAVLGGLLAEASSEED												Mascot
									FSGK
	3	ribulose-1,5-bisphosphate carboxylase/oxygenase large										ABK55668.1		20079.1	9.01		10	48	11.111
		subunit, partial (chloroplast) [Cucumis sativus]
		Peptide Information
		Calc. Mass		Obsrv. Mass	± da	± ppm	Start	End	Sequence			Ion	C. I. %	Modification						Rank	Result Type
							Seq.	Seq.				Score
		910.445		910.479	0.0338	37	24	30	AVYECLR					Carbamidomethyl (C)[5]							Mascot
		1170.56		1170.65	0.0886	76	140	148	QKNHGMHFR					Oxidation (M)[6]							Mascot
		1187.66		1187.67	0.0031	3	122	131	DNGLLLHIHR												Mascot
		1245.63		1245.65	0.0149	12	54	63	FLFCAEAIFK					Carbamidomethyl (C)[4]							Mascot
		1465.72		1465.78	0.0587	40	156	170	MSGGDHIHAGTVVGK												Mascot
		1502.85		1502.88	0.0301	20	1	13	YGRPLLGCTIKPK					Carbamidomethyl (C)[8]							Mascot
		1516.76		1516.78	0.0225	15	52	63	DRFLFCAEAIFK					Carbamidomethyl (C)[6]							Mascot
		1571.79		1571.77	-0.0232	-15	24	37	AVYECLRGGLDFTK												Mascot
		1755.75		1755.92	0.1678	96	73	88	GHYLNATAGTCEEMMK												Mascot
		1911.85		1912	0.1456	76	73	89	GHYLNATAGTCEEMMKR												Mascot
		1927.85		1927.96	0.1177	61	73	89	GHYLNATAGTCEEMMKR					Oxidation (M)[14]							Mascot
Project 1\Sample project20170120\R17064-6																				9	of	73
		1943.84		1943.94	0.1015	52	73	89	GHYLNATAGTCEEMMKR					Oxidation (M)[14,15]							Mascot
	4	ribulose-1,5-bisphosphate carboxylase/oxygenase large										AAZ94659.1		53384.8	6		15	48	9.041
		subunit (chloroplast) [Cucumis sativus]
		Peptide Information
		Calc. Mass		Obsrv. Mass	± da	± ppm	Start	End	Sequence			Ion	C. I. %	Modification						Rank	Result Type
							Seq.	Seq.				Score
		910.445		910.479	0.0338	37	195	201	AVYECLR					Carbamidomethyl (C)[5]							Mascot
		1021.53		1021.53	0.0031	3	40	48	DTDILAAFR												Mascot
		1170.56		1170.65	0.0886	76	311	319	QKNHGMHFR					Oxidation (M)[6]							Mascot
		1187.66		1187.67	0.0031	3	293	302	DNGLLLHIHR												Mascot
		1245.64		1245.65	0.0053	4	447	457	EGNEIIREASK												Mascot
		1275.73		1275.75	0.023	18	347	357	EITLGFVDLLR												Mascot
		1465.75		1465.78	0.0258	18	154	166	TFQGPPHGIQVER												Mascot
		1488.69		1488.81	0.121	81	471	482	EIKFEFEAMDTL					Oxidation (M)[9]							Mascot
		1488.69		1488.81	0.121	81	471	482	EIKFEFEAMDTL					Oxidation (M)[9]							Mascot
		1502.85		1502.88	0.0301	20	172	184	YGRPLLGCTIKPK					Carbamidomethyl (C)[8]							Mascot
		1516.76		1516.78	0.0225	15	223	234	DRFLFCAEAIFK					Carbamidomethyl (C)[6]							Mascot
		1571.79		1571.77	-0.0232	-15	195	208	AVYECLRGGLDFTK												Mascot
		1639.74		1639.9	0.1627	99	2	15	SCREGLMSPQTETK					Carbamidomethyl (C)[2], Oxidation (M)[7]							Mascot
		1755.75		1755.92	0.1678	96	244	259	GHYLNATAGTCEEMMK												Mascot
		1911.85		1912	0.1456	76	244	260	GHYLNATAGTCEEMMKR												Mascot
		1927.85		1927.96	0.1177	61	244	260	GHYLNATAGTCEEMMKR					Oxidation (M)[14]							Mascot
		1943.84		1943.94	0.1015	52	244	260	GHYLNATAGTCEEMMKR					Oxidation (M)[14,15]							Mascot
		2252.22		2252.13	-0.0882	-39	147	166	IPTAYIKTFQGPPHGIQVE												Mascot
									R
	5	ribulose-1,5-bisphosphate carboxylase/oxygenase large										ALX36885.1		48042.2	6.09		13	47	4.754
		subunit, partial (chloroplast) [Cucumis sativus]
		Peptide Information
		Calc. Mass		Obsrv. Mass	± da	± ppm	Start	End	Sequence			Ion	C. I. %	Modification						Rank	Result Type
							Seq.	Seq.				Score
		910.445		910.479	0.0338	37	165	171	AVYECLR					Carbamidomethyl (C)[5]							Mascot
		1021.53		1021.53	0.0031	3	10	18	DTDILAAFR												Mascot
		1170.56		1170.65	0.0886	76	281	289	QKNHGMHFR					Oxidation (M)[6]							Mascot
		1187.66		1187.67	0.0031	3	263	272	DNGLLLHIHR												Mascot
		1245.64		1245.65	0.0053	4	417	427	EGNEIIREASK												Mascot
		1275.73		1275.75	0.023	18	317	327	EITLGFVDLLR												Mascot
		1465.75		1465.78	0.0258	18	124	136	TFQGPPHGIQVER												Mascot
Project 1\Sample project20170120\R17064-6				1465.78																10	Mascot	of	73
		1502.85		1502.88	0.0301	20	142	154	YGRPLLGCTIKPK					Carbamidomethyl (C)[8]							Mascot
		1516.76		1516.78	0.0225	15	193	204	DRFLFCAEAIFK					Carbamidomethyl (C)[6]							Mascot
		1571.79		1571.77	-0.0232	-15	165	178	AVYECLRGGLDFTK												Mascot
		1755.75		1755.92	0.1678	96	214	229	GHYLNATAGTCEEMMK												Mascot
		1911.85		1912	0.1456	76	214	230	GHYLNATAGTCEEMMKR												Mascot
		1927.85		1927.96	0.1177	61	214	230	GHYLNATAGTCEEMMKR					Oxidation (M)[14]							Mascot
		1943.84		1943.94	0.1015	52	214	230	GHYLNATAGTCEEMMKR					Oxidation (M)[14,15]							Mascot
		2252.22		2252.13	-0.0882	-39	117	136	IPTAYIKTFQGPPHGIQVE												Mascot
									R
	6	ribulose-1,5-bisphosphate carboxylase/oxygenase large										AAA84187.1		51587	6		14	46	0
		subunit, partial (chloroplast) [Cucumis sativus]
		Protein Group
		ribulose 1,5-bisphosphate carboxylase, partial										AAL35646.1		51587		6
		(chloroplast) [Cucumis sativus]
		Peptide Information
		Calc. Mass		Obsrv. Mass	± da	± ppm	Start	End	Sequence			Ion	C. I. %	Modification						Rank	Result Type
							Seq.	Seq.				Score
		910.445		910.479	0.0338	37	179	185	AVYECLR					Carbamidomethyl (C)[5]							Mascot
		1021.53		1021.53	0.0031	3	24	32	DTDILAAFR												Mascot
		1170.56		1170.65	0.0886	76	295	303	QKNHGMHFR					Oxidation (M)[6]							Mascot
		1187.66		1187.67	0.0031	3	277	286	DNGLLLHIHR												Mascot
		1245.64		1245.65	0.0053	4	431	441	EGNEIIREASK												Mascot
		1275.73		1275.75	0.023	18	331	341	EITLGFVDLLR												Mascot
		1465.75		1465.78	0.0258	18	138	150	TFQGPPHGIQVER												Mascot
		1488.69		1488.81	0.121	81	455	466	EIKFEFEAMDTL					Oxidation (M)[9]							Mascot
		1488.69		1488.81	0.121	81	455	466	EIKFEFEAMDTL					Oxidation (M)[9]							Mascot
		1502.85		1502.88	0.0301	20	156	168	YGRPLLGCTIKPK					Carbamidomethyl (C)[8]							Mascot
		1516.76		1516.78	0.0225	15	207	218	DRFLFCAEAIFK					Carbamidomethyl (C)[6]							Mascot
		1571.79		1571.77	-0.0232	-15	179	192	AVYECLRGGLDFTK												Mascot
		1755.75		1755.92	0.1678	96	228	243	GHYLNATAGTCEEMMK												Mascot
		1911.85		1912	0.1456	76	228	244	GHYLNATAGTCEEMMKR												Mascot
		1927.85		1927.96	0.1177	61	228	244	GHYLNATAGTCEEMMKR					Oxidation (M)[14]							Mascot
		1943.84		1943.94	0.1015	52	228	244	GHYLNATAGTCEEMMKR					Oxidation (M)[14,15]							Mascot
		2252.22		2252.13	-0.0882	-39	131	150	IPTAYIKTFQGPPHGIQVE												Mascot
									R
	7	hypothetical protein Csa_2G035470 [Cucumis sativus]										KGN61047.1		54910.4	5.16		11	44	0		13	0
		Protein Group
Project 1\Sample project20170120\R17064-6																				11	of	73
		PREDICTED: leucine aminopeptidase 3, chloroplastic										XP_004144796.2		54910.4		5.1599
		[Cucumis sativus]														998474
																1211
		Peptide Information
		Calc. Mass		Obsrv. Mass	± da	± ppm	Start	End	Sequence			Ion	C. I. %	Modification						Rank	Result Type
							Seq.	Seq.				Score
		843.505		843.537	0.0319	38	85	92	SGQAIVLR												Mascot
		1024.51		1024.52	0.0157	15	237	245	NYSDVLSAR												Mascot
		1271.63		1271.65	0.02	16	296	307	GITFDSGGYNLK												Mascot
		1380.67		1380.7	0.0267	19	246	256	IFNEDEIIEMK												Mascot
		1396.67		1396.7	0.0344	25	246	256	IFNEDEIIEMK					Oxidation (M)[10]							Mascot
		1488.78		1488.81	0.0292	20	200	212	YAQYVSSGIVFVR												Mascot
		1488.78		1488.81	0.0292	20	200	212	YAQYVSSGIVFVR												Mascot
		1513.69		1513.74	0.0565	37	448	459	LPIEESYWDSMK					Oxidation (M)[11]							Mascot
		1715.98		1715.94	-0.0394	-23	5	21	IPPTLGLTRPGPSNAPK												Mascot
		1838.98		1838.95	-0.0247	-13	385	401	LCLADALIYTCKLGVDK												Mascot
		1930.07		1930	-0.0681	-35	177	196	ATVLQSVDVLGLGSGAA												Mascot
									MIK
		1946.06		1946	-0.0594	-31	177	196	ATVLQSVDVLGLGSGAA					Oxidation (M)[18]							Mascot
									MIK
		2236.13		2236.15	0.0193	9	63	84	KLDAVLGGLLAEASSEED												Mascot
									FSGK
		2503.39		2503.43	0.0459	18	213	236	ELVNSPANILTPGQLAAE												Mascot
									VLNIAR
		2503.39		2503.43	0.0459	18	213	236	ELVNSPANILTPGQLAAE			13	0								Mascot
									VLNIAR
	8	hypothetical protein Csa_6G450370 [Cucumis sativus]										KGN48232.1		47714.4	5.48		9	44	0		17	0
		Protein Group
		PREDICTED: enolase isoform X1 [Cucumis sativus]										XP_004143301.1		47714.4		5.48
																190
																7349
		Peptide Information
		Calc. Mass		Obsrv. Mass	± da	± ppm	Start	End	Sequence			Ion	C. I. %	Modification						Rank	Result Type
							Seq.	Seq.				Score
		806.452		806.471	0.0189	23	416	421	YNQLLR												Mascot
		1513.88		1513.74	-0.1326	-88	111	125	LGANAILAVSLALCK					Carbamidomethyl (C)[14]							Mascot
		1639.9		1639.9	0.0053	3	189	202	MGVEVYHHLKSVIK												Mascot
		1804.94		1804.97	0.0298	17	35	52	AAVPSGASTGIYEALELR												Mascot
		1824.91		1824.95	0.0337	18	422	438	IEEELGSAAVYAGVNFR												Mascot
		1841.96		1841.98	0.0229	12	17	34	GNPTVEVDIVLSDGSLAR												Mascot
		1841.96		1841.98	0.0229	12	17	34	GNPTVEVDIVLSDGSLAR			17	0								Mascot
		2252.13		2252.13	0.0012	1	382	403	SGETEDTFIADLSVGLAT												Mascot
Project 1\Sample project20170120\R17064-6				2252.13																12	Mascot	of	73
									GQIK
		2324.04		2324.06	0.0224	10	205	226	YGQDATNVGDEGGFAPN												Mascot
									IQENK
		2988.32		2988.37	0.053	18	289	313	SFASEYPIVSIEDPFDQD												Mascot
									DWEHYAK
	9	PREDICTED: ankyrin repeat protein SKIP35 [Cucumis										XP_004144185.1		68251.7	5.45		15	44	0
		sativus]
		Protein Group
		PREDICTED: ankyrin repeat protein SKIP35 [Cucumis										XP_011657394.1		68251.7		5.4499
		sativus]														998092
																6514
		hypothetical protein Csa_6G366310 [Cucumis sativus]										KGN47633.1		68251.7		5.4499
																998092
																6514
		Peptide Information
		Calc. Mass		Obsrv. Mass	± da	± ppm	Start	End	Sequence			Ion	C. I. %	Modification						Rank	Result Type
							Seq.	Seq.				Score
		843.468		843.537	0.0682	81	581	588	GQLVEAAR												Mascot
		1024.51		1024.52	0.0157	15	49	58	GEGSSVVFSR												Mascot
		1390.68		1390.69	0.0122	9	82	93	SMLMVTDHKQGK					Oxidation (M)[2]							Mascot
		1516.69		1516.78	0.0958	63	184	197	TSFLASCVSACQSR					Carbamidomethyl (C)[7]							Mascot
		1699.77		1699.87	0.1043	61	66	81	ESVLAHGCNSNEQSPK												Mascot
		1760.92		1760.91	-0.0101	-6	401	415	AAERGCLPVVEWFVK					Carbamidomethyl (C)[6]							Mascot
		1792.94		1792.97	0.028	16	198	213	TMSLADTVTVMAQRLR												Mascot
		1795		1794.92	-0.0857	-48	540	555	WGGFPISLRDIPAPLR												Mascot
		1804.87		1804.97	0.0992	55	216	232	LQECNGDEVLKAEAGTK												Mascot
		1824.93		1824.95	0.0157	9	198	213	TMSLADTVTVMAQRLR					Oxidation (M)[2,11]							Mascot
		1861.9		1861.97	0.0691	37	216	232	LQECNGDEVLKAEAGTK					Carbamidomethyl (C)[4]							Mascot
		1927.95		1927.96	0.0158	8	180	197	AALRTSFLASCVSACQSR					Carbamidomethyl (C)[11]							Mascot
		1941.13		1940.95	-0.179	-92	549	565	DIPAPLRVAIAYLPLYR												Mascot
		2041.98		2042.03	0.0506	25	39	58	GDVYAPASEKGEGSSVV												Mascot
									FSR
		2095.97		2096.04	0.0769	37	11	28	DNVADEALMFDQINMEIK												Mascot
		2236.06		2236.15	0.0921	41	29	48	TEENEIDIQKGDVYAPAS												Mascot
									EK
		2249.04		2249.1	0.0664	30	236	254	FTEWALKCIGFHSGCHG					Carbamidomethyl (C)[8,15]							Mascot
									NK
	10	hypothetical protein Csa_3G333840 [Cucumis sativus]										KGN57826.1		17153.5	5.57		8	44	0
		Protein Group
		PREDICTED: kirola [Cucumis sativus]										XP_004149786.1		17153.5		5.57
																1716
																6138
		Peptide Information
Project 1\Sample project20170120\R17064-6																				13	of	73
		Calc. Mass		Obsrv. Mass	± da	± ppm	Start	End	Sequence			Ion	C. I. %	Modification						Rank	Result Type
							Seq.	Seq.				Score
		1381.64		1381.69	0.0497	36	140	151	VAKGLDDYLCNN					Carbamidomethyl (C)[10]							Mascot
		1479.71		1479.82	0.1088	74	81	93	SITFECLEGDPLR												Mascot
		1531.78		1531.84	0.0656	43	2	14	AQICEISEQVNIK					Carbamidomethyl (C)[4]							Mascot
		1678.81		1678.95	0.1332	79	1	14	MAQICEISEQVNIK					Carbamidomethyl (C)[5], Oxidation (M)[1]							Mascot
		1841.85		1841.98	0.1344	73	28	41	MDYVFVQMFPEIYK					Oxidation (M)[1,8]							Mascot
		1841.85		1841.98	0.1344	73	28	41	MDYVFVQMFPEIYK					Oxidation (M)[1,8]							Mascot
		2042.03		2042.03	-0.0005	0	2	19	AQICEISEQVNIKSSAHK					Carbamidomethyl (C)[4]							Mascot
		2252.15		2252.13	-0.0186	-8	123	142	ANEDVASPHHYLLCVTKV					Carbamidomethyl (C)[14]							Mascot
									AK
		2320.15		2320.24	0.093	40	73	93	LAIDDANKSITFECLEGDP												Mascot
									LR
Project 1\Sample project20170120\R17064-6																				14	of	73
Gel Idx/Pos			315/M17						Instr./Gel Origin		BA2151/Sample Project 20170120					Process Status			Analysis Succeeded
Plate [#] Name			[1] Sample Project 20170120						Instrument Sample Name							Spectra			11
Rank		Protein Name						Species				Accession No.		Protein MW		Protein	Pep.	Protein	Protein		Total Ion	Total Ion
																PI	Count	Score	Score		Score	C. I. %
																			C. I. %
	1	hypothetical protein Csa_1G537560 [Cucumis sativus]										KGN65908.1		49770.8	4.85		19	216	100		125	100
		Protein Group
		PREDICTED: tubulin beta chain [Cucumis sativus]										XP_004135544.1		49770.8		4.8499
																999046
																3257
		Peptide Information
		Calc. Mass		Obsrv. Mass	± da	± ppm	Start	End	Sequence			Ion	C. I. %	Modification						Rank	Result Type
							Seq.	Seq.				Score
		1059.53		1059.55	0.0224	21	310	318	YLTASAMFR												Mascot
		1075.52		1075.56	0.0311	29	310	318	YLTASAMFR					Oxidation (M)[7]							Mascot
		1077.53		1077.56	0.026	24	155	162	IREEYPDR												Mascot
		1139.69		1139.72	0.0227	20	253	262	LAVNLIPFPR												Mascot
		1146.59		1146.62	0.0259	23	242	251	FPGQLNSDLR												Mascot
		1146.59		1146.62	0.0259	23	242	251	FPGQLNSDLR												Mascot
		1215.58		1215.61	0.0291	24	381	390	VSEQFTAMFR												Mascot
		1215.58		1215.61	0.0291	24	381	390	VSEQFTAMFR												Mascot
		1231.58		1231.6	0.0252	20	381	390	VSEQFTAMFR					Oxidation (M)[8]							Mascot
		1231.58		1231.6	0.0252	20	381	390	VSEQFTAMFR					Oxidation (M)[8]							Mascot
		1296.61		1296.64	0.0309	24	36	46	YSGDSELQLER												Mascot
		1300.69		1300.62	-0.0762	-59	351	362	SSVCDIPPKGLK					Carbamidomethyl (C)[4]							Mascot
		1342.64		1342.67	0.0277	21	47	58	INVYYNEASGGR												Mascot
		1342.64		1342.67	0.0277	21	47	58	INVYYNEASGGR			23	40.01								Mascot
		1622.85		1622.88	0.0269	17	263	276	LHFFMVGFAPLTSR												Mascot
		1633.79		1633.83	0.0371	23	63	77	AVLMDLEPGTMDSVR												Mascot
		1649.79		1649.81	0.0234	14	63	77	AVLMDLEPGTMDSVR					Oxidation (M)[4]							Mascot
		1665.78		1665.8	0.0221	13	63	77	AVLMDLEPGTMDSVR					Oxidation (M)[4,11]							Mascot
		1696.83		1696.85	0.0181	11	337	350	NSSYFVEWIPNNVK												Mascot
		1730.88		1730.89	0.0147	8	283	297	ALTVPELTQQMWDAK												Mascot
		1746.87		1746.9	0.0258	15	283	297	ALTVPELTQQMWDAK					Oxidation (M)[11]							Mascot
		1822.92		1822.94	0.0142	8	3	19	EILHIQGGQCGNQIGAK					Carbamidomethyl (C)[10]							Mascot
		1919.9		1919.94	0.0417	22	363	379	MASTFIGNSTSIQEMFR												Mascot
		1935.89		1935.92	0.0258	13	363	379	MASTFIGNSTSIQEMFR					Oxidation (M)[1]							Mascot
Project 1\Sample project20170120\R17064-6																				15	of	73
		1942.88		1942.91	0.0385	20	20	35	FWEVICDEHGIDHTGK					Carbamidomethyl (C)[6]							Mascot
		1951.89		1951.96	0.074	38	363	379	MASTFIGNSTSIQEMFR					Oxidation (M)[1,15]							Mascot
		1973		1973.03	0.0365	18	104	121	GHYTEGAELIDSVLDVVR												Mascot
		1973		1973.03	0.0365	18	104	121	GHYTEGAELIDSVLDVVR			94	100								Mascot
		2720.27		2720.34	0.0756	28	283	306	ALTVPELTQQMWDAKNM												Mascot
									MCAADPR
		2735.33		2735.39	0.0606	22	217	241	LATPTFGDLNHLISATMS					Carbamidomethyl (C)[22,23]							Mascot
									GVTCCLR
		2814.34		2814.4	0.062	22	78	103	SGPYGQIFRPDNFVFGQ												Mascot
									SGAGNNWAK
		2814.34		2814.4	0.062	22	78	103	SGPYGQIFRPDNFVFGQ			8	0								Mascot
									SGAGNNWAK
	2	hypothetical protein Csa_2G368830 [Cucumis sativus]										KGN62682.1		50380.9	4.74		12	163	100		125	100
		Protein Group
		PREDICTED: tubulin beta chain [Cucumis sativus]										XP_004152649.1		50380.9		4.7399
																997711
																1816
		Peptide Information
		Calc. Mass		Obsrv. Mass	± da	± ppm	Start	End	Sequence			Ion	C. I. %	Modification						Rank	Result Type
							Seq.	Seq.				Score
		1059.53		1059.55	0.0224	21	312	320	YLTASAMFR												Mascot
		1075.52		1075.56	0.0311	29	312	320	YLTASAMFR					Oxidation (M)[7]							Mascot
		1077.53		1077.56	0.026	24	157	164	IREEYPDR												Mascot
		1139.69		1139.72	0.0227	20	255	264	LAVNLIPFPR												Mascot
		1146.59		1146.62	0.0259	23	244	253	FPGQLNSDLR												Mascot
		1146.59		1146.62	0.0259	23	244	253	FPGQLNSDLR												Mascot
		1215.58		1215.61	0.0291	24	383	392	VSEQFTAMFR												Mascot
		1215.58		1215.61	0.0291	24	383	392	VSEQFTAMFR												Mascot
		1231.58		1231.6	0.0252	20	383	392	VSEQFTAMFR					Oxidation (M)[8]							Mascot
		1231.58		1231.6	0.0252	20	383	392	VSEQFTAMFR					Oxidation (M)[8]							Mascot
		1300.69		1300.62	-0.0762	-59	353	364	SSVCDIPPKGLK					Carbamidomethyl (C)[4]							Mascot
		1342.64		1342.67	0.0277	21	49	60	INVYYNEASGGR												Mascot
		1342.64		1342.67	0.0277	21	49	60	INVYYNEASGGR			23	40.01								Mascot
		1622.85		1622.88	0.0269	17	265	278	LHFFMVGFAPLTSR												Mascot
		1696.83		1696.85	0.0181	11	339	352	NSSYFVEWIPNNVK												Mascot
		1905.88		1905.95	0.0684	36	365	381	MASTFVGNSTSIQEMFR												Mascot
		1973		1973.03	0.0365	18	106	123	GHYTEGAELIDSVLDVVR												Mascot
		1973		1973.03	0.0365	18	106	123	GHYTEGAELIDSVLDVVR			94	100								Mascot
		2814.34		2814.4	0.062	22	80	105	SGPYGQIFRPDNFVFGQ												Mascot
									SGAGNNWAK
		2814.34		2814.4	0.062	22	80	105	SGPYGQIFRPDNFVFGQ			8	0								Mascot
Project 1\Sample project20170120\R17064-6				2814.4																16	Mascot	of	73
									SGAGNNWAK
	3	hypothetical protein Csa_1G042790 [Cucumis sativus]										KGN64172.1		49823.7	4.78		14	145	100		94	100
		Protein Group
		PREDICTED: tubulin beta chain [Cucumis sativus]										XP_004137501.1		49823.7		4.78
																2098
																835
		Peptide Information
		Calc. Mass		Obsrv. Mass	± da	± ppm	Start	End	Sequence			Ion	C. I. %	Modification						Rank	Result Type
							Seq.	Seq.				Score
		1059.53		1059.55	0.0224	21	310	318	YLTASAMFR												Mascot
		1075.52		1075.56	0.0311	29	310	318	YLTASAMFR					Oxidation (M)[7]							Mascot
		1077.53		1077.56	0.026	24	155	162	IREEYPDR												Mascot
		1139.69		1139.72	0.0227	20	253	262	LAVNLIPFPR												Mascot
		1146.59		1146.62	0.0259	23	242	251	FPGQLNSDLR												Mascot
		1146.59		1146.62	0.0259	23	242	251	FPGQLNSDLR												Mascot
		1215.58		1215.61	0.0291	24	381	390	VSEQFTAMFR												Mascot
		1215.58		1215.61	0.0291	24	381	390	VSEQFTAMFR												Mascot
		1231.58		1231.6	0.0252	20	381	390	VSEQFTAMFR					Oxidation (M)[8]							Mascot
		1231.58		1231.6	0.0252	20	381	390	VSEQFTAMFR					Oxidation (M)[8]							Mascot
		1300.59		1300.62	0.0251	19	47	58	ANVYYNEASGGR												Mascot
		1622.85		1622.88	0.0269	17	263	276	LHFFMVGFAPLTSR												Mascot
		1633.79		1633.83	0.0371	23	63	77	AVLMDLEPGTMDAVR					Oxidation (M)[4]							Mascot
		1649.79		1649.81	0.0234	14	63	77	AVLMDLEPGTMDAVR					Oxidation (M)[4,11]							Mascot
		1696.83		1696.85	0.0181	11	337	350	NSSYFVEWIPNNVK												Mascot
		1730.88		1730.89	0.0147	8	283	297	ALTVPELTQQMWDAK												Mascot
		1746.87		1746.9	0.0258	15	283	297	ALTVPELTQQMWDAK					Oxidation (M)[11]							Mascot
		1973		1973.03	0.0365	18	104	121	GHYTEGAELIDSVLDVVR												Mascot
		1973		1973.03	0.0365	18	104	121	GHYTEGAELIDSVLDVVR			94	100								Mascot
		2239.02		2239.17	0.154	69	360	379	GFPMASTFVGNSTSIQE					Oxidation (M)[4,18]							Mascot
									MFR
		2395.12		2395.18	0.0606	25	360	380	GFPMASTFVGNSTSIQE					Oxidation (M)[4,18]							Mascot
									MFRR
		2720.27		2720.34	0.0756	28	283	306	ALTVPELTQQMWDAKNM												Mascot
									MCAADPR
	4	hypothetical protein Csa_3G732650 [Cucumis sativus]										KGN58809.1		50040.8	4.73		13	137	100		94	100
		Protein Group
		PREDICTED: tubulin beta chain-like [Cucumis sativus]										XP_004137743.1		50040.8		4.73
																190
																7349
		Peptide Information
Project 1\Sample project20170120\R17064-6																				17	of	73
		Calc. Mass		Obsrv. Mass	± da	± ppm	Start	End	Sequence			Ion	C. I. %	Modification						Rank	Result Type
							Seq.	Seq.				Score
		1059.53		1059.55	0.0224	21	310	318	YLTASAMFR												Mascot
		1075.52		1075.56	0.0311	29	310	318	YLTASAMFR					Oxidation (M)[7]							Mascot
		1077.53		1077.56	0.026	24	155	162	IREEYPDR												Mascot
		1139.69		1139.72	0.0227	20	253	262	LAVNLIPFPR												Mascot
		1146.59		1146.62	0.0259	23	242	251	FPGQLNSDLR												Mascot
		1146.59		1146.62	0.0259	23	242	251	FPGQLNSDLR												Mascot
		1215.58		1215.61	0.0291	24	381	390	VSEQFTAMFR												Mascot
		1215.58		1215.61	0.0291	24	381	390	VSEQFTAMFR												Mascot
		1231.58		1231.6	0.0252	20	381	390	VSEQFTAMFR					Oxidation (M)[8]							Mascot
		1231.58		1231.6	0.0252	20	381	390	VSEQFTAMFR					Oxidation (M)[8]							Mascot
		1622.85		1622.88	0.0269	17	263	276	LHFFMVGFAPLTSR												Mascot
		1677.82		1677.88	0.0626	37	63	77	AVLMDLEPGVMDSIR					Oxidation (M)[4,11]							Mascot
		1696.83		1696.85	0.0181	11	337	350	NSSYFVEWIPNNVK												Mascot
		1730.88		1730.89	0.0147	8	283	297	ALTVPELTQQMWDAK												Mascot
		1746.87		1746.9	0.0258	15	283	297	ALTVPELTQQMWDAK					Oxidation (M)[11]							Mascot
		1822.92		1822.94	0.0142	8	3	19	EILHIQGGQCGNQIGAK					Carbamidomethyl (C)[10]							Mascot
		1919.9		1919.94	0.0417	22	363	379	MASTFLGNSTSIQEMFR												Mascot
		1935.89		1935.92	0.0258	13	363	379	MASTFLGNSTSIQEMFR					Oxidation (M)[1]							Mascot
		1951.89		1951.96	0.074	38	363	379	MASTFLGNSTSIQEMFR					Oxidation (M)[1,15]							Mascot
		1973		1973.03	0.0365	18	104	121	GHYTEGAELIDSVLDVVR												Mascot
		1973		1973.03	0.0365	18	104	121	GHYTEGAELIDSVLDVVR			94	100								Mascot
		2720.27		2720.34	0.0756	28	283	306	ALTVPELTQQMWDAKNM												Mascot
									MCAADPR
	5	hypothetical protein Csa_4G307390 [Cucumis sativus]										KGN54346.1		50180.8	4.74		12	130	100		94	100
		Protein Group
		PREDICTED: tubulin beta chain [Cucumis sativus]										XP_004147894.1		50180.8		4.7399
																997711
																1816
		Peptide Information
		Calc. Mass		Obsrv. Mass	± da	± ppm	Start	End	Sequence			Ion	C. I. %	Modification						Rank	Result Type
							Seq.	Seq.				Score
		1059.53		1059.55	0.0224	21	310	318	YLTASAMFR												Mascot
		1075.52		1075.56	0.0311	29	310	318	YLTASAMFR					Oxidation (M)[7]							Mascot
		1077.53		1077.56	0.026	24	155	162	IREEYPDR												Mascot
		1139.69		1139.72	0.0227	20	253	262	LAVNLIPFPR												Mascot
Project 1\Sample project20170120\R17064-6																				18	of	73
		1146.59		1146.62	0.0259	23	242	251	FPGQLNSDLR												Mascot
		1146.59		1146.62	0.0259	23	242	251	FPGQLNSDLR												Mascot
		1215.58		1215.61	0.0291	24	381	390	VSEQFTAMFR												Mascot
		1215.58		1215.61	0.0291	24	381	390	VSEQFTAMFR												Mascot
		1231.58		1231.6	0.0252	20	381	390	VSEQFTAMFR					Oxidation (M)[8]							Mascot
		1231.58		1231.6	0.0252	20	381	390	VSEQFTAMFR					Oxidation (M)[8]							Mascot
		1622.85		1622.88	0.0269	17	263	276	LHFFMVGFAPLTSR												Mascot
		1696.83		1696.85	0.0181	11	337	350	NSSYFVEWIPNNVK												Mascot
		1730.88		1730.89	0.0147	8	283	297	ALTVPELTQQMWDAK												Mascot
		1746.87		1746.9	0.0258	15	283	297	ALTVPELTQQMWDAK					Oxidation (M)[11]							Mascot
		1919.9		1919.94	0.0417	22	363	379	MASTFIGNSTSIQEMFR												Mascot
		1935.89		1935.92	0.0258	13	363	379	MASTFIGNSTSIQEMFR					Oxidation (M)[1]							Mascot
		1951.89		1951.96	0.074	38	363	379	MASTFIGNSTSIQEMFR					Oxidation (M)[1,15]							Mascot
		1973		1973.03	0.0365	18	104	121	GHYTEGAELIDSVLDVVR												Mascot
		1973		1973.03	0.0365	18	104	121	GHYTEGAELIDSVLDVVR			94	100								Mascot
		2720.27		2720.34	0.0756	28	283	306	ALTVPELTQQMWDAKNM												Mascot
									MCAADPR
		2830.37		2830.4	0.0257	9	78	103	SGLYGQIFRPDNFVFGQ												Mascot
									SGAGNNWAK
	6	Tubulin alpha-3 chain [Cucumis sativus]										KGN59749.1		49624.5	4.95		11	108	100		72	100
		Protein Group
		PREDICTED: tubulin alpha-6 chain [Cucumis sativus]										XP_004141134.1		49624.5		4.9499
																998092
																6514
		Peptide Information
		Calc. Mass		Obsrv. Mass	± da	± ppm	Start	End	Sequence			Ion	C. I. %	Modification						Rank	Result Type
							Seq.	Seq.				Score
		1059.53		1059.55	0.0224	21	395	402	FDLMYAKR					Oxidation (M)[4]							Mascot
		1075.55		1075.56	0.01	9	113	121	EIVDLCLDR												Mascot
		1396.76		1396.75	-0.0038	-3	85	96	QLFHPEQLISGK												Mascot
		1517.89		1517.87	-0.0181	-12	230	243	LISQVISSLTTSLR												Mascot
		1691.87		1691.88	0.0079	5	216	229	SLDIERPTYTNLNR												Mascot
		1715.92		1715.95	0.0288	17	65	79	AIFVDLEPTVIDEVR												Mascot
		1715.92		1715.95	0.0288	17	65	79	AIFVDLEPTVIDEVR			48	99.814								Mascot
		1814.91		1814.91	-0.0044	-2	353	370	CGINYQPPSVVPGGDLA												Mascot
									K
		1841.89		1841.96	0.0763	41	374	390	AVCMISNSTAVAEVFSR					Carbamidomethyl (C)[3]							Mascot
		2225.12		2225.14	0.0249	11	371	390	VQRAVCMISNSTAVAEVF					Carbamidomethyl (C)[6]							Mascot
									SR
		2330.02		2330.06	0.0437	19	403	422	AFVHWYVGEGMEEGEF												Mascot
									SEAR
Project 1\Sample project20170120\R17064-6																				19	of	73
		2346.01		2346.06	0.0505	22	403	422	AFVHWYVGEGMEEGEF					Oxidation (M)[11]							Mascot
									SEAR
		2409.21		2409.25	0.0427	18	244	264	FDGAINVDITEFQTNLVPY												Mascot
									PR
		2409.21		2409.25	0.0427	18	244	264	FDGAINVDITEFQTNLVPY			24	58.497								Mascot
									PR
	7	hypothetical protein Csa_4G268090 [Cucumis sativus]										KGN54025.1		49634.4	4.9		9	97	99.999		72	100
		Protein Group
		PREDICTED: tubulin alpha-3 chain [Cucumis sativus]										XP_004149645.1		49634.4		4.9
																953
																6743
		Peptide Information
		Calc. Mass		Obsrv. Mass	± da	± ppm	Start	End	Sequence			Ion	C. I. %	Modification						Rank	Result Type
							Seq.	Seq.				Score
		1059.53		1059.55	0.0224	21	395	402	FDLMYAKR					Oxidation (M)[4]							Mascot
		1075.55		1075.56	0.01	9	113	121	EIVDLCLDR												Mascot
		1396.76		1396.75	-0.0038	-3	85	96	QLFHPEQLISGK												Mascot
		1531.91		1531.93	0.0216	14	230	243	LISQIISSLTTSLR												Mascot
		1677.86		1677.88	0.0257	15	216	229	SLDIDRPTYTNLNR												Mascot
		1715.92		1715.95	0.0288	17	65	79	AIFVDLEPTVIDEVR												Mascot
		1715.92		1715.95	0.0288	17	65	79	AIFVDLEPTVIDEVR			48	99.814								Mascot
		2254.16		2254.16	-0.0019	-1	353	373	CGINYQPPTVVPGGDLAL					Carbamidomethyl (C)[1]							Mascot
									VQR
		2330.02		2330.06	0.0437	19	403	422	AFVHWYVGEGMEEGEF												Mascot
									SEAR
		2346.01		2346.06	0.0505	22	403	422	AFVHWYVGEGMEEGEF					Oxidation (M)[11]							Mascot
									SEAR
		2409.21		2409.25	0.0427	18	244	264	FDGAINVDITEFQTNLVPY												Mascot
									PR
		2409.21		2409.25	0.0427	18	244	264	FDGAINVDITEFQTNLVPY			24	58.497								Mascot
									PR
	8	hypothetical protein Csa_3G684170 [Cucumis sativus]										KGN58559.1		125538	6.1		26	72	99.712
		Protein Group
		PREDICTED: disease resistance protein RGA2-like										XP_004149742.2		125538		6.0999
		[Cucumis sativus]														999046
																3257
		Peptide Information
		Calc. Mass		Obsrv. Mass	± da	± ppm	Start	End	Sequence			Ion	C. I. %	Modification						Rank	Result Type
							Seq.	Seq.				Score
		870.53		870.566	0.0364	42	682	689	ITELGPLK												Mascot
		1126.64		1126.62	-0.0135	-12	210	218	LVFNHELVR												Mascot
		1146.63		1146.62	-0.0139	-12	541	550	EMINVAGKLR					Oxidation (M)[2]							Mascot
		1146.63		1146.62	-0.0139	-12	541	550	EMINVAGKLR					Oxidation (M)[2]							Mascot
Project 1\Sample project20170120\R17064-6																				20	of	73
		1215.54		1215.61	0.0769	63	481	490	CLFEFEDANK												Mascot
		1215.54		1215.61	0.0769	63	481	490	CLFEFEDANK												Mascot
		1225.75		1225.65	-0.0983	-80	682	692	ITELGPLKNLK												Mascot
		1231.69		1231.6	-0.0918	-75	41	50	WLLNAQAFLR												Mascot
		1231.69		1231.6	-0.0918	-75	41	50	WLLNAQAFLR												Mascot
		1342.78		1342.67	-0.11	-82	191	204	TSILPIVGMGGLGK												Mascot
		1342.78		1342.67	-0.11	-82	191	204	TSILPIVGMGGLGK												Mascot
		1453.73		1453.77	0.0405	28	939	950	LPEDLCHLMNLR												Mascot
		1465.79		1465.78	-0.0108	-7	760	771	HLPNNIFVENLR												Mascot
		1472.68		1472.71	0.0242	16	481	492	CLFEFEDANKTR												Mascot
		1670.76		1670.84	0.0815	49	508	521	MHDLVHDIAMETSR					Oxidation (M)[1]							Mascot
		1677.87		1677.88	0.0143	9	224	237	TVWVCVSEPFIVNK					Carbamidomethyl (C)[5]							Mascot
		1691.97		1691.88	-0.0901	-53	611	625	LPESIVSLHNLQTLK												Mascot
		1699.84		1699.85	0.0124	7	2	15	ADFLWTFAVEEMLK												Mascot
		1715.84		1715.95	0.1153	67	2	15	ADFLWTFAVEEMLK					Oxidation (M)[12]							Mascot
		1715.84		1715.95	0.1153	67	2	15	ADFLWTFAVEEMLK					Oxidation (M)[12]							Mascot
		1831.89		1832	0.1021	56	718	732	ENLMALHLGWSMNRK					Oxidation (M)[4,12]							Mascot
		1887.09		1886.93	-0.1573	-83	924	938	NKPKLWYLIIGWLDK												Mascot
		1928.99		1928.98	-0.0147	-8	313	330	SAEVAKIMGTCPSHLLSK					Carbamidomethyl (C)[11]							Mascot
		1935.97		1935.92	-0.0536	-28	897	914	LPDGLQFCSSIEGLTIDK												Mascot
		2004.99		2005.14	0.1512	75	418	435	LPSSSVKQCFAYCSIFPK												Mascot
		2225.19		2225.14	-0.0522	-23	753	771	ITNFAGRHLPNNIFVENLR												Mascot
		2284.13		2284.19	0.0532	23	711	731	GADLAGKENLMALHLGW												Mascot
									SMNR
		2395.2		2395.18	-0.0227	-9	626	645	FVYSVIEEFSMNFTNLVS												Mascot
									LR
		2408.28		2408.23	-0.0462	-19	732	752	KDNDLEVLEGLQPNINLQ												Mascot
									SLR
		2720.36		2720.34	-0.0154	-6	1011	1033	IEALPEWLGNYVCLQTLN												Mascot
									LWNCK
		2735.34		2735.39	0.0496	18	772	794	EIHLSHCNSCEKLPMLGQ					Carbamidomethyl (C)[7,10]							Mascot
									LNNLK
		2846.38		2846.38	-0.0052	-2	760	783	HLPNNIFVENLREIHLSHC												Mascot
									NSCEK
	9	PREDICTED: 26S protease regulatory subunit 6A										XP_011648845.1		38614.9	5.16		14	61	96.295
		homolog isoform X2 [Cucumis sativus]
		Peptide Information
		Calc. Mass		Obsrv. Mass	± da	± ppm	Start	End	Sequence			Ion	C. I. %	Modification						Rank	Result Type
							Seq.	Seq.				Score
		1139.68		1139.72	0.038	33	53	63	LKPGDLVGVNK												Mascot
		1305.67		1305.68	0.0161	12	306	317	AVCVEAGMLALR					Carbamidomethyl (C)[3], Oxidation (M)[8]							Mascot
Project 1\Sample project20170120\R17064-6																				21	of	73
		1325.65		1325.66	0.0157	12	260	270	IEFPHPTEEAR												Mascot
		1453.74		1453.77	0.0261	18	259	270	KIEFPHPTEEAR												Mascot
		1644.88		1644.85	-0.0295	-18	159	174	LAGPQLVQMFIGDGAK												Mascot
		1660.87		1660.87	0.0009	1	159	174	LAGPQLVQMFIGDGAK					Oxidation (M)[9]							Mascot
		1670.8		1670.84	0.0486	29	281	294	MNVHPDVNFEELAR												Mascot
		1730.96		1730.89	-0.0694	-40	130	146	GVLLYGPPGTGKTLMAR												Mascot
		1746.96		1746.9	-0.0582	-33	130	146	GVLLYGPPGTGKTLMAR					Oxidation (M)[15]							Mascot
		1814.89		1814.91	0.0208	11	280	294	KMNVHPDVNFEELAR					Oxidation (M)[2]							Mascot
		1822.97		1822.94	-0.036	-20	102	117	QIQELGEAIVLPMTHK					Oxidation (M)[13]							Mascot
		1886.9		1886.93	0.0299	16	64	79	DSYLILDTLPSEYDSR												Mascot
		1967.94		1967.96	0.0261	13	217	233	TMLELLNQLDGFSSDER												Mascot
		1983.93		1983.96	0.0306	15	217	233	TMLELLNQLDGFSSDER					Oxidation (M)[2]							Mascot
		2225.11		2225.14	0.0298	13	217	235	TMLELLNQLDGFSSDERI					Oxidation (M)[2]							Mascot
									K
		2257.07		2257.14	0.0684	30	319	338	DATEVNHEDFNEGIIQVQ												Mascot
									AK
		2409.19		2409.25	0.061	25	295	317	STDDFNGAQLKAVCVEA												Mascot
									GMLALR
		2409.19		2409.25	0.061	25	295	317	STDDFNGAQLKAVCVEA												Mascot
									GMLALR
	10	hypothetical protein Csa_2G031700 [Cucumis sativus]										KGN60962.1		47400.4	4.99		14	56	88.009
		Protein Group
		PREDICTED: 26S protease regulatory subunit 6A										XP_004144776.1		47400.4		4.9899
		homolog isoform X1 [Cucumis sativus]														997711
																1816
		Peptide Information
		Calc. Mass		Obsrv. Mass	± da	± ppm	Start	End	Sequence			Ion	C. I. %	Modification						Rank	Result Type
							Seq.	Seq.				Score
		1139.68		1139.72	0.038	33	129	139	LKPGDLVGVNK												Mascot
		1305.67		1305.68	0.0161	12	382	393	AVCVEAGMLALR					Carbamidomethyl (C)[3], Oxidation (M)[8]							Mascot
		1325.65		1325.66	0.0157	12	336	346	IEFPHPTEEAR												Mascot
		1453.74		1453.77	0.0261	18	335	346	KIEFPHPTEEAR												Mascot
		1644.88		1644.85	-0.0295	-18	235	250	LAGPQLVQMFIGDGAK												Mascot
		1660.87		1660.87	0.0009	1	235	250	LAGPQLVQMFIGDGAK					Oxidation (M)[9]							Mascot
		1670.8		1670.84	0.0486	29	357	370	MNVHPDVNFEELAR												Mascot
		1730.96		1730.89	-0.0694	-40	206	222	GVLLYGPPGTGKTLMAR												Mascot
		1746.96		1746.9	-0.0582	-33	206	222	GVLLYGPPGTGKTLMAR					Oxidation (M)[15]							Mascot
		1814.89		1814.91	0.0208	11	356	370	KMNVHPDVNFEELAR					Oxidation (M)[2]							Mascot
		1822.97		1822.94	-0.036	-20	178	193	QIQELGEAIVLPMTHK					Oxidation (M)[13]							Mascot
		1886.9		1886.93	0.0299	16	140	155	DSYLILDTLPSEYDSR												Mascot
Project 1\Sample project20170120\R17064-6																				22	of	73
		1967.94		1967.96	0.0261	13	293	309	TMLELLNQLDGFSSDER												Mascot
		1983.93		1983.96	0.0306	15	293	309	TMLELLNQLDGFSSDER					Oxidation (M)[2]							Mascot
		2225.11		2225.14	0.0298	13	293	311	TMLELLNQLDGFSSDERI					Oxidation (M)[2]							Mascot
									K
		2257.07		2257.14	0.0684	30	395	414	DATEVNHEDFNEGIIQVQ												Mascot
									AK
		2409.19		2409.25	0.061	25	371	393	STDDFNGAQLKAVCVEA												Mascot
									GMLALR
		2409.19		2409.25	0.061	25	371	393	STDDFNGAQLKAVCVEA												Mascot
									GMLALR
Project 1\Sample project20170120\R17064-6																				23	of	73
Gel Idx/Pos			316/M18						Instr./Gel Origin		BA2151/Sample Project 20170120					Process Status			Analysis Succeeded
Plate [#] Name			[1] Sample Project 20170120						Instrument Sample Name							Spectra			11
Rank		Protein Name						Species				Accession No.		Protein MW		Protein	Pep.	Protein	Protein		Total Ion	Total Ion
																PI	Count	Score	Score		Score	C. I. %
																			C. I. %
	1	hypothetical protein Csa_3G116860 [Cucumis sativus]										KGN56349.1		11414.7	4.34		2	170	100		156	100
		Protein Group
		PREDICTED: 60S acidic ribosomal protein P1 [Cucumis										XP_004133766.1		11414.7		4.34
		sativus]														1525
																8789
		Peptide Information
		Calc. Mass		Obsrv. Mass	± da	± ppm	Start	End	Sequence			Ion	C. I. %	Modification						Rank	Result Type
							Seq.	Seq.				Score
		1663.8		1663.83	0.0271	16	36	49	VSDVESYWYGLFAK												Mascot
		1663.8		1663.83	0.0271	16	36	49	VSDVESYWYGLFAK			108	100								Mascot
		3395.76		3395.82	0.0669	20	55	95	SIGDLILNVGAGGGAAVA												Mascot
									AAAPAGGAAGGGAAAAA
									PPPEEK
		3395.76		3395.82	0.0669	20	55	95	SIGDLILNVGAGGGAAVA			48	99.914								Mascot
									AAAPAGGAAGGGAAAAA
									PPPEEK
	2	PREDICTED: two-on-two hemoglobin-3 isoform X1										XP_011649743.1		24267.4	9.67		9	41	0
		[Cucumis sativus]
		Peptide Information
		Calc. Mass		Obsrv. Mass	± da	± ppm	Start	End	Sequence			Ion	C. I. %	Modification						Rank	Result Type
							Seq.	Seq.				Score
		841.475		841.547	0.0713	85	133	138	MIKFFR												Mascot
		849.388		849.366	-0.0219	-26	179	185	IQGCTDR					Carbamidomethyl (C)[4]							Mascot
		865.408		865.323	-0.0855	-99	1	7	MQSLQDK					Oxidation (M)[1]							Mascot
		1249.64		1249.63	-0.002	-2	79	89	MGGPPLYSQRK					Oxidation (M)[1]							Mascot
		1373.56		1373.69	0.1225	89	47	56	VYDDDEEWFR												Mascot
		1709.82		1709.82	-0.0001	0	1	15	MQSLQDKASEWSGVK					Oxidation (M)[1]							Mascot
		1794.9		1794.83	-0.0675	-38	16	30	REDAFAIDEVNLFQK												Mascot
		1901.03		1901	-0.0232	-12	31	46	LGLQTFVNLSTKFYNR												Mascot
		2298.14		2298.22	0.0791	34	136	153	FFRHVFFSCIVPSTFNHR					Carbamidomethyl (C)[9]							Mascot
	3	PREDICTED: transcription factor bHLH130 isoform X3										XP_011659462.1		46406.1	8.28		10	35	0
		[Cucumis sativus]
		Peptide Information
							Start	End				Ion
Project 1\Sample project20170120\R17064-6		Calc. Mass		Obsrv. Mass	± da	± ppm			Sequence				C. I. %	Modification						Rank	24	Result Type	of	73
							Seq.	Seq.				Score
		818.248		818.32	0.072	88	412	419	CTCSCSSQ												Mascot
		854.364		854.293	-0.0709	-83	102	109	FDSGSGER												Mascot
		886.361		886.312	-0.0495	-56	11	17	FSNDEMK					Oxidation (M)[6]							Mascot
		1692.71		1692.84	0.1319	78	94	109	FMASCNGKFDSGSGER												Mascot
		1699.85		1699.86	0.0175	10	382	396	TSTADMLELAVEYIK					Oxidation (M)[6]							Mascot
		2214.05		2213.84	-0.2102	-95	82	101	SSSPEVEVILSRFMASCN					Carbamidomethyl (C)[17], Oxidation (M)[14]							Mascot
									GK
		2221.06		2221.14	0.0762	34	177	197	QSSSPAGFFSHLIAENGN												Mascot
									TTR
		2748.2		2748.38	0.1845	67	144	169	APVGNSYGVMNSSDFDN					Oxidation (M)[10]							Mascot
									SMQSQLGAR
		2932.42		2932.38	-0.0394	-13	372	396	LQELFPDMDKTSTADML					Oxidation (M)[8,16]							Mascot
									ELAVEYIK
		3395.5		3395.82	0.3247	96	113	143	EETGEPVQQQNGFCNQ					Carbamidomethyl (C)[14], Oxidation (M)[20]							Mascot
									PSSMVNTRSVDAGGR
		3395.5		3395.82	0.3247	96	113	143	EETGEPVQQQNGFCNQ					Carbamidomethyl (C)[14], Oxidation (M)[20]							Mascot
									PSSMVNTRSVDAGGR
	4	hypothetical protein Csa_2G375770 [Cucumis sativus]										KGN62837.1		19708.8	6.65		7	33	0
		Protein Group
		PREDICTED: two-on-two hemoglobin-3 isoform X2										XP_004138784.1		19708.8		6.65
		[Cucumis sativus]														953
																6743
		Peptide Information
		Calc. Mass		Obsrv. Mass	± da	± ppm	Start	End	Sequence			Ion	C. I. %	Modification						Rank	Result Type
							Seq.	Seq.				Score
		841.475		841.547	0.0713	85	133	138	MIKFFR												Mascot
		849.413		849.366	-0.0471	-55	1	7	MQSLQDK												Mascot
		865.408		865.323	-0.0855	-99	1	7	MQSLQDK					Oxidation (M)[1]							Mascot
		1249.64		1249.63	-0.002	-2	79	89	MGGPPLYSQRK					Oxidation (M)[1]							Mascot
		1373.56		1373.69	0.1225	89	47	56	VYDDDEEWFR												Mascot
		1709.82		1709.82	-0.0001	0	1	15	MQSLQDKASEWSGVK					Oxidation (M)[1]							Mascot
		1794.9		1794.83	-0.0675	-38	16	30	REDAFAIDEVNLFQK												Mascot
		1901.03		1901	-0.0232	-12	31	46	LGLQTFVNLSTKFYNR												Mascot
	5	PREDICTED: uncharacterized protein LOC101207332										XP_004140429.1		28348.3	8.86		7	28	0
		[Cucumis sativus]
		Peptide Information
		Calc. Mass		Obsrv. Mass	± da	± ppm	Start	End	Sequence			Ion	C. I. %	Modification						Rank	Result Type
							Seq.	Seq.				Score
		841.5		841.547	0.0464	55	223	229	DRPRIGK												Mascot
		1486.63		1486.68	0.0535	36	116	127	TENEGMNFEMLR					Oxidation (M)[6]							Mascot
Project 1\Sample project20170120\R17064-6				1486.68																25	Mascot	of	73
		1794.91		1794.83	-0.0709	-40	227	243	IGKAVSIFIDMDESGGR												Mascot
		2401.15		2401.29	0.1358	57	230	250	AVSIFIDMDESGGRANE												Mascot
									WIYK
		2409.13		2409.15	0.0267	11	86	107	QLRPVFAGSIDGAMDPD												Mascot
									DPDHR
		2506.35		2506.29	-0.06	-24	1	23	MNTAIGSHILSQILDSPLP												Mascot
									VPFR
		2752.36		2752.36	-0.0026	-1	31	55	IMTSVTFGHQSNWSPGIG												Mascot
									IQEHLGR
	6	PREDICTED: protein SAWADEE HOMEODOMAIN										XP_011651299.1		38442.4	6.73		8	27	0
		HOMOLOG 2 isoform X2 [Cucumis sativus]
		Peptide Information
		Calc. Mass		Obsrv. Mass	± da	± ppm	Start	End	Sequence			Ion	C. I. %	Modification						Rank	Result Type
							Seq.	Seq.				Score
		1249.62		1249.63	0.0131	10	256	267	SGMDSVLLSGQR												Mascot
		1567.76		1567.78	0.0137	9	2	15	EAILQGHNNTMPAR					Oxidation (M)[11]							Mascot
		1567.76		1567.78	0.0137	9	2	15	EAILQGHNNTMPAR					Oxidation (M)[11]							Mascot
		1714.8		1714.86	0.0586	34	1	15	MEAILQGHNNTMPAR					Oxidation (M)[1,12]							Mascot
		1759.86		1759.95	0.0911	52	215	228	YDHDQSEEIVQLRK												Mascot
		1759.86		1759.95	0.0911	52	215	228	YDHDQSEEIVQLRK												Mascot
		1791.95		1791.87	-0.0774	-43	16	31	EVLVALADKFSESVER												Mascot
		1927.89		1927.94	0.0458	24	139	154	FSGFGSEEDEWVNIRR												Mascot
		2506.31		2506.29	-0.0197	-8	2	24	EAILQGHNNTMPAREVLV					Oxidation (M)[11]							Mascot
									ALADK
		2752.4		2752.36	-0.0415	-15	232	255	RPETDYRLQQLHAVNEA												Mascot
									ASIEPSK
	7	hypothetical protein Csa_4G312870 [Cucumis sativus]										KGN54405.1		11125.8	9.92		4	26	0
		Peptide Information
		Calc. Mass		Obsrv. Mass	± da	± ppm	Start	End	Sequence			Ion	C. I. %	Modification						Rank	Result Type
							Seq.	Seq.				Score
		1725.91		1725.79	-0.1179	-68	71	84	IVHYFDSSSLVFRR												Mascot
		1759.88		1759.95	0.0671	38	48	60	VQWRHAITMYWPR					Oxidation (M)[9]							Mascot
		1759.88		1759.95	0.0671	38	48	60	VQWRHAITMYWPR					Oxidation (M)[9]							Mascot
		2691.35		2691.37	0.0217	8	20	45	EIGSIGDDINSLSTSIQGG												Mascot
									TSWLVNK
		2932.53		2932.38	-0.1451	-49	20	47	EIGSIGDDINSLSTSIQGG												Mascot
									TSWLVNKIK
	8	hypothetical protein Csa_3G134930 [Cucumis sativus]										KGN56845.1		15455.5	10.19		5	26	0
		Protein Group
		PREDICTED: 60S ribosomal protein L14-2-like										XP_004134055.1		15455.5		10.189
		[Cucumis sativus]														999580
Project 1\Sample project20170120\R17064-6																				26	of	73
																3833
		Peptide Information
		Calc. Mass		Obsrv. Mass	± da	± ppm	Start	End	Sequence			Ion	C. I. %	Modification						Rank	Result Type
							Seq.	Seq.				Score
		851.4		851.332	-0.0683	-80	70	76	ELMEAMK												Mascot
		867.395		867.381	-0.0144	-17	70	76	ELMEAMK					Oxidation (M)[3]							Mascot
		1011.48		1011.47	-0.0186	-18	69	76	KELMEAMK					Oxidation (M)[4,7]							Mascot
		1479.72		1479.83	0.1083	73	70	82	ELMEAMKAADVQK					Oxidation (M)[3]							Mascot
		2045.03		2045.07	0.033	16	6	23	YVEIGRVALVNYGEDYGK												Mascot
		2691.44		2691.37	-0.0664	-25	12	35	VALVNYGEDYGKLVVIVD												Mascot
									VIDQNR
	9	hypothetical protein Csa_1G011490 [Cucumis sativus]										KGN63697.1		13199.8	9.46		5	26	0
		Protein Group
		PREDICTED: mitochondrial import inner membrane										XP_011660201.1		13199.8		9.46
		translocase subunit tim16-like [Cucumis sativus]														381
																4697
		Peptide Information
		Calc. Mass		Obsrv. Mass	± da	± ppm	Start	End	Sequence			Ion	C. I. %	Modification						Rank	Result Type
							Seq.	Seq.				Score
		849.341		849.366	0.0257	30	111	119	GQDGPSCVS												Mascot
		1249.62		1249.63	0.0132	11	49	59	ASKVMTEQEAR												Mascot
		1794.84		1794.83	-0.0094	-5	103	119	LETLHHSKGQDGPSCVS												Mascot
		1900.97		1901	0.0323	17	60	75	QILGVTEEMPWEEIVK												Mascot
		2045.06		2045.07	0.0044	2	60	76	QILGVTEEMPWEEIVKK					Oxidation (M)[9]							Mascot
	10	hypothetical protein Csa_7G072200 [Cucumis sativus]										KGN43882.1		35224	8.68		8	25	0
		Peptide Information
		Calc. Mass		Obsrv. Mass	± da	± ppm	Start	End	Sequence			Ion	C. I. %	Modification						Rank	Result Type
							Seq.	Seq.				Score
		834.399		834.338	-0.0616	-74	305	311	SWDIINS												Mascot
		1464.68		1464.72	0.0347	24	225	235	NWKPFCSNFHK					Carbamidomethyl (C)[6]							Mascot
		1692.89		1692.84	-0.0493	-29	90	104	TSTSTSLLHSVFREK												Mascot
		1699.8		1699.86	0.0599	35	105	119	TFEASKHANHVDSEK												Mascot
		2210.15		2210.13	-0.0228	-10	178	196	VIKSHHGYTWLELCPLTG												Mascot
									R
		2214.05		2213.84	-0.2068	-93	53	72	RSLDELAASCLSYGYSEP												Mascot
									PR
		2239.02		2239.16	0.1394	62	13	30	DYCNKEEETFMHSLVLH					Oxidation (M)[11]							Mascot
									K
		2292.19		2292.12	-0.0706	-31	198	217	HQLRVHCAEVLGTPIVGD					Carbamidomethyl (C)[7]							Mascot
									YK
Project 1\Sample project20170120\R17064-6																				27	of	73
Project 1\Sample project20170120\R17064-6																				28	of	73
Gel Idx/Pos			317/M19						Instr./Gel Origin		BA2151/Sample Project 20170120					Process Status			Analysis Succeeded
Plate [#] Name			[1] Sample Project 20170120						Instrument Sample Name							Spectra			11
Rank		Protein Name						Species				Accession No.		Protein MW		Protein	Pep.	Protein	Protein		Total Ion	Total Ion
																PI	Count	Score	Score		Score	C. I. %
																			C. I. %
	1	hypothetical protein Csa_5G609710 [Cucumis sativus]										KGN52085.1		20685.2	8.24		14	151	100		37	98.166
		Protein Group
		PREDICTED: ribulose bisphosphate carboxylase small										XP_004135094.1		20685.2		8.2399
		chain, chloroplastic [Cucumis sativus]														997711
																1816
		ribulose-1,5-bisphosphate carboxylase small subunit										CCF55356.1		20713.2		8.2399
		[Cucumis sativus]														997711
																1816
		Peptide Information
		Calc. Mass		Obsrv. Mass	± da	± ppm	Start	End	Sequence			Ion	C. I. %	Modification						Rank	Result Type
							Seq.	Seq.				Score
		914.4		914.43	0.0295	32	117	124	SPGYYDGR			21	27.327								Mascot
		914.423		914.43	0.0069	8	125	130	YWTMWK												Mascot
		919.5		919.528	0.028	30	160	167	VIGFDNVR												Mascot
		919.5		919.528	0.028	30	160	167	VIGFDNVR			13	0								Mascot
		930.418		930.446	0.0285	31	125	130	YWTMWK					Oxidation (M)[4]							Mascot
		937.562		937.59	0.0283	30	62	69	VWPPLGLR												Mascot
		937.562		937.59	0.0283	30	62	69	VWPPLGLR												Mascot
		968.451		968.477	0.0265	27	88	94	ECDYLLR					Carbamidomethyl (C)[2]							Mascot
		968.451		968.477	0.0265	27	88	94	ECDYLLR					Carbamidomethyl (C)[2]							Mascot
		1010.49		1010.52	0.0294	29	152	159	EYPDAFIR												Mascot
		1010.49		1010.52	0.0294	29	152	159	EYPDAFIR			17	0								Mascot
		1138.59		1138.62	0.0308	27	151	159	KEYPDAFIR												Mascot
		1583.86		1583.77	-0.0814	-51	57	69	VQCMKVWPPLGLR					Carbamidomethyl (C)[3]							Mascot
		1706.9		1706.94	0.0398	23	168	181	QVQCISFIAYKPPR					Carbamidomethyl (C)[4]							Mascot
		2044.96		2045.06	0.1041	51	95	112	NGWVPCVEFDIGSGFVY												Mascot
									R
		2101.98		2102.03	0.051	24	95	112	NGWVPCVEFDIGSGFVY					Carbamidomethyl (C)[6]							Mascot
									R
		2130.04		2130.07	0.0315	15	70	87	KFETLSYLPDMSNEQLSK												Mascot
		2134.08		2134.02	-0.0613	-29	168	185	QVQCISFIAYKPPRFYSS												Mascot
		2146.04		2146.07	0.0297	14	70	87	KFETLSYLPDMSNEQLSK					Oxidation (M)[11]							Mascot
		2225.05		2225.16	0.1169	53	131	150	LPMFGCTDSSQVIQEIEE												Mascot
									AK
		2298.06		2298.18	0.1155	50	131	150	LPMFGCTDSSQVIQEIEE					Carbamidomethyl (C)[6], Oxidation (M)[3]							Mascot
									AK
Project 1\Sample project20170120\R17064-6																				29	of	73
		2353.14		2353.11	-0.033	-14	131	151	LPMFGCTDSSQVIQEIEE												Mascot
									AKK
		2369.14		2369.1	-0.0315	-13	131	151	LPMFGCTDSSQVIQEIEE					Oxidation (M)[3]							Mascot
									AKK
		2426.16		2426.19	0.0371	15	131	151	LPMFGCTDSSQVIQEIEE					Carbamidomethyl (C)[6], Oxidation (M)[3]							Mascot
									AKK
	2	putative chloroplast ribulose-1,5-bisphosphate										ABN41481.1		10907.3	5.24		7	101	100		37	98.166
		carboxylase/oxygenase small subunit, partial [Cucumis
		sativus]
		Peptide Information
		Calc. Mass		Obsrv. Mass	± da	± ppm	Start	End	Sequence			Ion	C. I. %	Modification						Rank	Result Type
							Seq.	Seq.				Score
		914.4		914.43	0.0295	32	21	28	SPGYYDGR			21	27.327								Mascot
		914.423		914.43	0.0069	8	29	34	YWTMWK												Mascot
		919.5		919.528	0.028	30	64	71	VIGFDNVR												Mascot
		919.5		919.528	0.028	30	64	71	VIGFDNVR			13	0								Mascot
		930.418		930.446	0.0285	31	29	34	YWTMWK					Oxidation (M)[4]							Mascot
		1010.49		1010.52	0.0294	29	56	63	EYPDAFIR												Mascot
		1010.49		1010.52	0.0294	29	56	63	EYPDAFIR			17	0								Mascot
		1138.59		1138.62	0.0308	27	55	63	KEYPDAFIR												Mascot
		2225.05		2225.16	0.1169	53	35	54	LPMFGCTDSSQVIQEIEE												Mascot
									AK
		2298.06		2298.18	0.1155	50	35	54	LPMFGCTDSSQVIQEIEE					Carbamidomethyl (C)[6], Oxidation (M)[3]							Mascot
									AK
		2353.14		2353.11	-0.033	-14	35	55	LPMFGCTDSSQVIQEIEE												Mascot
									AKK
		2369.14		2369.1	-0.0315	-13	35	55	LPMFGCTDSSQVIQEIEE					Oxidation (M)[3]							Mascot
									AKK
		2426.16		2426.19	0.0371	15	35	55	LPMFGCTDSSQVIQEIEE					Carbamidomethyl (C)[6], Oxidation (M)[3]							Mascot
									AKK
	3	ribulose bisphosphate carboxylase/oxygenase										AAA33131.1		21049.4	7.55		11	100	100		17	0
		precursor peptide [Cucumis sativus]
		Protein Group
		RecName: Full=Ribulose bisphosphate carboxylase										sp|P08474.1|RBS_		21049.4		7.55
		small chain, chloroplastic; Short=RuBisCO small										CUCSA				1907
		subunit; Flags: Precursor														3486
		Peptide Information
		Calc. Mass		Obsrv. Mass	± da	± ppm	Start	End	Sequence			Ion	C. I. %	Modification						Rank	Result Type
							Seq.	Seq.				Score
		914.423		914.43	0.0069	8	125	130	YWTMWK												Mascot
		914.423		914.43	0.0069	8	125	130	YWTMWK												Mascot
		919.5		919.528	0.028	30	160	167	VIGFDNVR												Mascot
		919.5		919.528	0.028	30	160	167	VIGFDNVR			13	0								Mascot
		930.418		930.446	0.0285	31	125	130	YWTMWK					Oxidation (M)[4]							Mascot
Project 1\Sample project20170120\R17064-6				930.446																30	Mascot	of	73
		937.562		937.59	0.0283	30	62	69	VWPPLGLR												Mascot
		937.562		937.59	0.0283	30	62	69	VWPPLGLR												Mascot
		968.451		968.477	0.0265	27	88	94	ECDYLLR					Carbamidomethyl (C)[2]							Mascot
		968.451		968.477	0.0265	27	88	94	ECDYLLR					Carbamidomethyl (C)[2]							Mascot
		1010.49		1010.52	0.0294	29	152	159	EYPDAFIR												Mascot
		1010.49		1010.52	0.0294	29	152	159	EYPDAFIR			17	0								Mascot
		1138.59		1138.62	0.0308	27	151	159	KEYPDAFIR												Mascot
		1583.86		1583.77	-0.0814	-51	57	69	VQCMKVWPPLGLR					Carbamidomethyl (C)[3]							Mascot
		2044.96		2045.06	0.1041	51	95	112	NGWVPCVEFDIGSGFVY												Mascot
									R
		2101.98		2102.03	0.051	24	95	112	NGWVPCVEFDIGSGFVY					Carbamidomethyl (C)[6]							Mascot
									R
		2130.04		2130.07	0.0315	15	70	87	KFETLSYLPDMSNEQLSK												Mascot
		2146.04		2146.07	0.0297	14	70	87	KFETLSYLPDMSNEQLSK					Oxidation (M)[11]							Mascot
		2225.05		2225.16	0.1169	53	131	150	LPMFGCTDSSQVIQEIEE												Mascot
									AK
		2298.06		2298.18	0.1155	50	131	150	LPMFGCTDSSQVIQEIEE					Carbamidomethyl (C)[6], Oxidation (M)[3]							Mascot
									AK
		2353.14		2353.11	-0.033	-14	131	151	LPMFGCTDSSQVIQEIEE												Mascot
									AKK
		2369.14		2369.1	-0.0315	-13	131	151	LPMFGCTDSSQVIQEIEE					Oxidation (M)[3]							Mascot
									AKK
		2426.16		2426.19	0.0371	15	131	151	LPMFGCTDSSQVIQEIEE					Carbamidomethyl (C)[6], Oxidation (M)[3]							Mascot
									AKK
	4	chloroplast ribulose-1,5-bisphosphate										ABK55670.1		13984.9	8.84		7	58	91.893		20	0
		carboxylase/oxygenase small subunit, partial [Cucumis
		sativus]
		Peptide Information
		Calc. Mass		Obsrv. Mass	± da	± ppm	Start	End	Sequence			Ion	C. I. %	Modification						Rank	Result Type
							Seq.	Seq.				Score
		914.4		914.43	0.0295	32	108	115	SPGYYDGR			21	27.327								Mascot
		914.423		914.43	0.0069	8	116	121	YWTMWK												Mascot
		930.418		930.446	0.0285	31	116	121	YWTMWK					Oxidation (M)[4]							Mascot
		937.562		937.59	0.0283	30	53	60	VWPPLGLR												Mascot
		937.562		937.59	0.0283	30	53	60	VWPPLGLR												Mascot
		968.451		968.477	0.0265	27	79	85	ECDYLLR					Carbamidomethyl (C)[2]							Mascot
		968.451		968.477	0.0265	27	79	85	ECDYLLR					Carbamidomethyl (C)[2]							Mascot
		1583.86		1583.77	-0.0814	-51	48	60	VQCMKVWPPLGLR					Carbamidomethyl (C)[3]							Mascot
		2044.96		2045.06	0.1041	51	86	103	NGWVPCVEFDIGSGFVY												Mascot
									R
		2101.98		2102.03	0.051	24	86	103	NGWVPCVEFDIGSGFVY					Carbamidomethyl (C)[6]							Mascot
									R
		2130.04		2130.07	0.0315	15	61	78	KFETLSYLPDMSNEQLSK												Mascot
Project 1\Sample project20170120\R17064-6																				31	of	73
		2146.04		2146.07	0.0297	14	61	78	KFETLSYLPDMSNEQLSK					Oxidation (M)[11]							Mascot
	5	hypothetical protein Csa_3G386810 [Cucumis sativus]										KGN57908.1		54382	5.71		10	56	88.549		24	63.07
		Protein Group
		PREDICTED: 11S globulin seed storage protein 2-like										XP_011652795.1		54382		5.71
		[Cucumis sativus]														381
																4697
		Peptide Information
		Calc. Mass		Obsrv. Mass	± da	± ppm	Start	End	Sequence			Ion	C. I. %	Modification						Rank	Result Type
							Seq.	Seq.				Score
		805.387		805.321	-0.0666	-83	416	422	TSNQPMK												Mascot
		867.527		867.552	0.0245	28	47	53	VRPPSRR												Mascot
		941.578		941.556	-0.0223	-24	321	328	VNILNQLK												Mascot
		1097.53		1097.55	0.025	23	33	41	FTTEAQLCK					Carbamidomethyl (C)[8]							Mascot
		1351.81		1351.84	0.0295	22	81	92	NIIRPNSLSLPK												Mascot
		1351.81		1351.84	0.0295	22	81	92	NIIRPNSLSLPK												Mascot
		2890.32		2890.41	0.0854	30	361	385	MVYVVDGEAEIQISDDYG												Mascot
									NQVFNER
		2981.35		2981.42	0.0769	26	54	80	IESEGGITELWDEADEEF					Carbamidomethyl (C)[20]							Mascot
									QCAGVGAIR
		2981.35		2981.42	0.0769	26	54	80	IESEGGITELWDEADEEF			24	63.07	Carbamidomethyl (C)[20]							Mascot
									QCAGVGAIR
		3009.26		3009.42	0.1575	52	260	284	CDEEMSFLTPEEEEEELS												Mascot
									ETSFSRR
		3137.45		3137.54	0.0918	29	53	80	RIESEGGITELWDEADEE					Carbamidomethyl (C)[21]							Mascot
									FQCAGVGAIR
		3151.47		3151.54	0.0622	20	334	360	FLGMSAEKGHLFANAQH					Oxidation (M)[4]							Mascot
									NLHWSMTDHR
	6	Mitochondrial dicarboxylate carrier protein [Cucumis										KGN48714.1		34210.3	10.04		11	50	51.152
		sativus]
		Protein Group
		PREDICTED: mitochondrial uncoupling protein 5										XP_004143448.1		34210.3		10.039
		[Cucumis sativus]														999961
																853
		Peptide Information
		Calc. Mass		Obsrv. Mass	± da	± ppm	Start	End	Sequence			Ion	C. I. %	Modification						Rank	Result Type
							Seq.	Seq.				Score
		867.541		867.552	0.0105	12	75	83	VGPIAVGVR												Mascot
		950.421		950.46	0.0383	40	122	129	WTDQDTGK												Mascot
		968.512		968.477	-0.035	-36	112	119	MGLYDILK					Oxidation (M)[1]							Mascot
		968.512		968.477	-0.035	-36	112	119	MGLYDILK					Oxidation (M)[1]							Mascot
		969.5		969.526	0.0263	27	104	111	QTLYSTTR												Mascot
		1351.7		1351.84	0.1313	97	283	294	TVRAEGPMALYK					Oxidation (M)[8]							Mascot
Project 1\Sample project20170120\R17064-6																				32	of	73
		1351.7		1351.84	0.1313	97	283	294	TVRAEGPMALYK					Oxidation (M)[8]							Mascot
		1576.78		1576.76	-0.02	-13	122	134	WTDQDTGKMPLIR					Oxidation (M)[9]							Mascot
		2045.14		2045.06	-0.0763	-37	84	103	IVQQEGVAALFSGVSATV												Mascot
									LR
		2146.1		2146.07	-0.0291	-14	265	285	VEAGAAPPYSGALDCAL					Carbamidomethyl (C)[15]							Mascot
									KTVR
		2352.14		2352.09	-0.0471	-20	260	282	VMNMKVEAGAAPPYSGA					Oxidation (M)[2]							Mascot
									LDCALK
		2995.62		2995.43	-0.188	-63	84	111	IVQQEGVAALFSGVSATV												Mascot
									LRQTLYSTTR
		3175.65		3175.59	-0.0513	-16	226	257	GLMKDGLGTHVTASFAA					Oxidation (M)[3]							Mascot
									GFVASVASNPVDVIK
	7	PREDICTED: E3 ubiquitin-protein ligase RGLG2										XP_011655384.1		52069.2	5.33		7	46	0		30	90.014
		isoform X1 [Cucumis sativus]
		Peptide Information
		Calc. Mass		Obsrv. Mass	± da	± ppm	Start	End	Sequence			Ion	C. I. %	Modification						Rank	Result Type
							Seq.	Seq.				Score
		919.459		919.528	0.0684	74	256	263	SVDTERGR												Mascot
		919.459		919.528	0.0684	74	256	263	SVDTERGR			30	90.014								Mascot
		1032.56		1032.54	-0.0207	-20	271	280	TVDAIVEASK												Mascot
		1285.75		1285.71	-0.041	-32	349	360	ATIELDILGGRK												Mascot
		1940.97		1940.95	-0.0148	-8	332	348	ETEFALAALMEIPSQYK												Mascot
		2142.12		2142.04	-0.0822	-38	1	17	MIFWGVSLLLFRLCCAR					Carbamidomethyl (C)[14,15]							Mascot
		3027.38		3027.45	0.0651	22	300	324	EFDDNIPSRAFDNFQFVN					Oxidation (M)[23]							Mascot
									FTEIMSK
		3134.59		3134.54	-0.0545	-17	271	299	TVDAIVEASKFPLSIVLVG					Oxidation (M)[27,28]							Mascot
									VGDGPWDMMR
	8	PREDICTED: E3 ubiquitin-protein ligase RGLG2										XP_011655386.1		49266.8	5.23		6	44	0		30	90.014
		isoform X2 [Cucumis sativus]
		Protein Group
		PREDICTED: E3 ubiquitin-protein ligase RGLG2										XP_011655385.1		49266.8		5.23
		isoform X2 [Cucumis sativus]														190
																7349
		PREDICTED: E3 ubiquitin-protein ligase RGLG2										XP_004142779.1		49266.8		5.23
		isoform X2 [Cucumis sativus]														190
																7349
		PREDICTED: E3 ubiquitin-protein ligase RGLG2										XP_011655387.1		49266.8		5.23
		isoform X2 [Cucumis sativus]														190
																7349
		hypothetical protein Csa_5G522920 [Cucumis sativus]										KGN51346.1		49266.8		5.23
																190
																7349
		Peptide Information
		Calc. Mass		Obsrv. Mass	± da	± ppm	Start	End	Sequence			Ion	C. I. %	Modification						Rank	Result Type
							Seq.	Seq.				Score
Project 1\Sample project20170120\R17064-6																				33	of	73
		919.459		919.528	0.0684	74	232	239	SVDTERGR												Mascot
		919.459		919.528	0.0684	74	232	239	SVDTERGR			30	90.014								Mascot
		1032.56		1032.54	-0.0207	-20	247	256	TVDAIVEASK												Mascot
		1285.75		1285.71	-0.041	-32	325	336	ATIELDILGGRK												Mascot
		1940.97		1940.95	-0.0148	-8	308	324	ETEFALAALMEIPSQYK												Mascot
		3027.38		3027.45	0.0651	22	276	300	EFDDNIPSRAFDNFQFVN					Oxidation (M)[23]							Mascot
									FTEIMSK
		3134.59		3134.54	-0.0545	-17	247	275	TVDAIVEASKFPLSIVLVG					Oxidation (M)[27,28]							Mascot
									VGDGPWDMMR
	9	PREDICTED: exosome component 10 isoform X2										XP_011649546.1		34851.8	5.94		5	42	0		30	90.014
		[Cucumis sativus]
		Peptide Information
		Calc. Mass		Obsrv. Mass	± da	± ppm	Start	End	Sequence			Ion	C. I. %	Modification						Rank	Result Type
							Seq.	Seq.				Score
		856.562		856.549	-0.0121	-14	289	296	VLIIGSVR												Mascot
		919.478		919.528	0.0498	54	301	308	AEAMLRGR					Oxidation (M)[4]							Mascot
		919.478		919.528	0.0498	54	301	308	AEAMLRGR			30	90.014	Oxidation (M)[4]							Mascot
		927.483		927.521	0.038	41	112	118	VIHDCKR					Carbamidomethyl (C)[5]							Mascot
		1794.95		1794.86	-0.0936	-52	175	189	AAADDVRFLLYIYHK												Mascot
		2721.29		2721.33	0.0428	16	46	69	EFVEPSPEKPLVVGFDCE					Carbamidomethyl (C)[17]							Mascot
									GVDLCR
	10	hypothetical protein Csa_2G352390 [Cucumis sativus]										KGN62409.1		38029.3	5.7		5	42	0		30	90.014
		Protein Group
		PREDICTED: exonuclease 3'-5' domain-containing										XP_004142915.1		38029.3		5.6999
		protein 1 isoform X1 [Cucumis sativus]														998092
																6514
		Peptide Information
		Calc. Mass		Obsrv. Mass	± da	± ppm	Start	End	Sequence			Ion	C. I. %	Modification						Rank	Result Type
							Seq.	Seq.				Score
		856.562		856.549	-0.0121	-14	317	324	VLIIGSVR												Mascot
		919.478		919.528	0.0498	54	329	336	AEAMLRGR					Oxidation (M)[4]							Mascot
		919.478		919.528	0.0498	54	329	336	AEAMLRGR			30	90.014	Oxidation (M)[4]							Mascot
		927.483		927.521	0.038	41	112	118	VIHDCKR					Carbamidomethyl (C)[5]							Mascot
		1794.95		1794.86	-0.0936	-52	203	217	AAADDVRFLLYIYHK												Mascot
		2721.29		2721.33	0.0428	16	46	69	EFVEPSPEKPLVVGFDCE					Carbamidomethyl (C)[17]							Mascot
									GVDLCR
Project 1\Sample project20170120\R17064-6																				34	of	73
Gel Idx/Pos			318/M20						Instr./Gel Origin		BA2151/Sample Project 20170120					Process Status			Analysis Succeeded
Plate [#] Name			[1] Sample Project 20170120						Instrument Sample Name							Spectra			11
Rank		Protein Name						Species				Accession No.		Protein MW		Protein	Pep.	Protein	Protein		Total Ion	Total Ion
																PI	Count	Score	Score		Score	C. I. %
																			C. I. %
	1	hypothetical protein Csa_6G008680 [Cucumis sativus]										KGN45737.1		51768.1	5.58		19	232	100		140	100
		Protein Group
		PREDICTED: ribulose bisphosphate										XP_004138462.1		51768.1		5.5799
		carboxylase/oxygenase activase, chloroplastic														999237
		[Cucumis sativus]														605
		Peptide Information
		Calc. Mass		Obsrv. Mass	± da	± ppm	Start	End	Sequence			Ion	C. I. %	Modification						Rank	Result Type
							Seq.	Seq.				Score
		895.416		895.454	0.0381	43	352	358	VYDDEVR												Mascot
		940.468		940.501	0.0339	36	303	309	FYWAPTR												Mascot
		940.468		940.501	0.0339	36	303	309	FYWAPTR												Mascot
		951.508		951.462	-0.0465	-49	313	321	IGVCSGIFR												Mascot
		1008.53		1008.56	0.0334	33	313	321	IGVCSGIFR					Carbamidomethyl (C)[4]							Mascot
		1129.55		1129.58	0.0294	26	378	387	EGPPTFEQPK												Mascot
		1171.58		1171.59	0.0091	8	172	181	SFQCELVFAK												Mascot
		1228.6		1228.64	0.0367	30	172	181	SFQCELVFAK					Carbamidomethyl (C)[4]							Mascot
		1351.68		1351.76	0.0772	57	310	321	EDRIGVCSGIFR												Mascot
		1623.76		1623.82	0.0534	33	222	236	MCALFINDLDAGAGR					Carbamidomethyl (C)[2]							Mascot
		1623.76		1623.82	0.0534	33	222	236	MCALFINDLDAGAGR					Carbamidomethyl (C)[2]							Mascot
		1639.76		1639.88	0.1203	73	222	236	MCALFINDLDAGAGR					Carbamidomethyl (C)[2], Oxidation (M)[1]							Mascot
		1679.79		1679.84	0.0534	32	73	87	GLAFDVSDDQQDITR			37	98.676								Mascot
		1679.81		1679.84	0.0283	17	416	431	YLSEAALGDANEDAIK												Mascot
		1864.9		1865.01	0.1021	55	73	89	GLAFDVSDDQQDITRGK												Mascot
		1882.97		1883.03	0.0593	31	333	349	LVDTFPGQSIDFFGALR												Mascot
		1882.97		1883.03	0.0593	31	333	349	LVDTFPGQSIDFFGALR			59	99.991								Mascot
		1922.95		1922.99	0.0378	20	393	408	LLEYGNMLVQEQENVK					Oxidation (M)[7]							Mascot
		2063.06		2063.12	0.0608	29	393	409	LLEYGNMLVQEQENVKR												Mascot
		2079.05		2079.1	0.0441	21	393	409	LLEYGNMLVQEQENVKR					Oxidation (M)[7]							Mascot
		2089.17		2089.23	0.0637	30	278	296	VPIIVTGNDFSTLYAPLIR												Mascot
		2089.17		2089.23	0.0637	30	278	296	VPIIVTGNDFSTLYAPLIR			46	99.84								Mascot
		2320.06		2320.08	0.018	8	182	204	MGINPIMMSAGELESGN					Oxidation (M)[1]							Mascot
									AGEPAK
		2352.13		2352.1	-0.0276	-12	352	371	VYDDEVRNWVCSVGVE					Carbamidomethyl (C)[11]							Mascot
Project 1\Sample project20170120\R17064-6				2352.1																35	Mascot	of	73
									NIAK
		2369.05		2369.12	0.0618	26	121	140	QYNFDNNVDGFYIAPAF												Mascot
									MDK
		2784.29		2784.37	0.0801	29	439	464	AAQQVSLPIPEGCTDPNA					Carbamidomethyl (C)[13]							Mascot
									DNFDPTAR
		3239.57		3239.67	0.1052	32	90	120	GMVDTLFQAPSGAGTHD												Mascot
									PVLSSYEYLSAGLR
		3255.56		3255.64	0.0777	24	90	120	GMVDTLFQAPSGAGTHD					Oxidation (M)[2]							Mascot
									PVLSSYEYLSAGLR
	2	Beta-form rubisco activase [Cucumis sativus]										KGN50568.1		48292.6	8.19		9	137	100		114	100
		Protein Group
		PREDICTED: ribulose bisphosphate										XP_004147680.1		48292.6		8.1899
		carboxylase/oxygenase activase 2, chloroplastic-like														995803
		[Cucumis sativus]														833
		Peptide Information
		Calc. Mass		Obsrv. Mass	± da	± ppm	Start	End	Sequence			Ion	C. I. %	Modification						Rank	Result Type
							Seq.	Seq.				Score
		895.416		895.454	0.0381	43	360	366	VYDDEVR												Mascot
		940.468		940.501	0.0339	36	311	317	FYWAPTR												Mascot
		940.468		940.501	0.0339	36	311	317	FYWAPTR												Mascot
		1171.58		1171.59	0.0091	8	180	189	SFQCELVFAK												Mascot
		1228.6		1228.64	0.0367	30	180	189	SFQCELVFAK					Carbamidomethyl (C)[4]							Mascot
		1567.72		1567.79	0.0786	50	57	70	VMAVESTSDENLEK					Oxidation (M)[2]							Mascot
		1639.76		1639.88	0.1203	73	230	244	MSCLFINDLDAGAGR					Carbamidomethyl (C)[3]							Mascot
		1679.82		1679.84	0.0249	15	57	71	VMAVESTSDENLEKK												Mascot
		1679.82		1679.84	0.0249	15	57	71	VMAVESTSDENLEKK			9	0								Mascot
		1838.98		1838.97	-0.007	-4	1	19	MAASAASVGVVNHAPLS					Oxidation (M)[1]							Mascot
									LK
		1882.97		1883.03	0.0593	31	341	357	LVDTFPGQSIDFFGALR												Mascot
		1882.97		1883.03	0.0593	31	341	357	LVDTFPGQSIDFFGALR			59	99.991								Mascot
		2089.17		2089.23	0.0637	30	286	304	VPIIVTGNDFSTLYAPLIR												Mascot
		2089.17		2089.23	0.0637	30	286	304	VPIIVTGNDFSTLYAPLIR			46	99.84								Mascot
	3	rubisco activase [Cucumis sativus]										CAA47906.1		45681.2	7.57		7	123	100		105	100
		Protein Group
		RecName: Full=Ribulose bisphosphate										sp|Q01587.1|RCA		45681.2		7.57
		carboxylase/oxygenase activase, chloroplastic;										_CUCSA				1716
		Short=RA; Short=RuBisCO activase; Flags: Precursor														6138
		Peptide Information
		Calc. Mass		Obsrv. Mass	± da	± ppm	Start	End	Sequence			Ion	C. I. %	Modification						Rank	Result Type
							Seq.	Seq.				Score
		895.416		895.454	0.0381	43	349	355	VYDDEVR												Mascot
		940.468		940.501	0.0339	36	300	306	FYWAPTR												Mascot
Project 1\Sample project20170120\R17064-6				940.501																36	Mascot	of	73
		940.468		940.501	0.0339	36	300	306	FYWAPTR												Mascot
		972.526		972.498	-0.0279	-29	357	365	WAVGVGVER												Mascot
		1171.58		1171.59	0.0091	8	169	178	SFQCELVFAK												Mascot
		1228.6		1228.64	0.0367	30	169	178	SFQCELVFAK					Carbamidomethyl (C)[4]							Mascot
		1882.97		1883.03	0.0593	31	330	346	LVDTFPGQSIDFFGALR												Mascot
		1882.97		1883.03	0.0593	31	330	346	LVDTFPGQSIDFFGALR			59	99.991								Mascot
		2089.17		2089.23	0.0637	30	275	293	VPIIVTGNDFSTLYAPLIR												Mascot
		2089.17		2089.23	0.0637	30	275	293	VPIIVTGNDFSTLYAPLIR			46	99.84								Mascot
		2320.06		2320.08	0.018	8	179	201	MGINPIMMSAGELESGN					Oxidation (M)[1]							Mascot
									AGEPAK
		2352.05		2352.1	0.0498	21	179	201	MGINPIMMSAGELESGN					Oxidation (M)[1,7,8]							Mascot
									AGEPAK
	4	PREDICTED: ribulose bisphosphate										XP_011656300.1		65239.3	4.53		7	117	100		105	100
		carboxylase/oxygenase activase, chloroplastic-like
		isoform X5 [Cucumis sativus]
		Protein Group
		PREDICTED: ribulose bisphosphate										XP_011656296.1		66712		4.5
		carboxylase/oxygenase activase, chloroplastic-like
		isoform X1 [Cucumis sativus]
		PREDICTED: ribulose bisphosphate										XP_011656297.1		66712		4.5
		carboxylase/oxygenase activase, chloroplastic-like
		isoform X2 [Cucumis sativus]
		PREDICTED: ribulose bisphosphate										XP_011656298.1		66611		4.5
		carboxylase/oxygenase activase, chloroplastic-like
		isoform X3 [Cucumis sativus]
		PREDICTED: ribulose bisphosphate										XP_011656299.1		66481.9		4.51
		carboxylase/oxygenase activase, chloroplastic-like														2288
		isoform X4 [Cucumis sativus]														8184
		PREDICTED: ribulose bisphosphate										XP_011656301.1		65110.3		4.5399
		carboxylase/oxygenase activase, chloroplastic-like														999618
		isoform X6 [Cucumis sativus]														5303
		chloroplast rubisco activase [Cucumis sativus]										ACS29559.1		66841		4.4899
																997711
																1816
		hypothetical protein Csa_6G188680 [Cucumis sativus]										KGN47126.1		66712		4.5
		ribulose bisphosphate carboxylase/oxygenase activase,										NP_001267655.1		66841		4.4899
		chloroplastic [Cucumis sativus]														997711
																1816
		Peptide Information
		Calc. Mass		Obsrv. Mass	± da	± ppm	Start	End	Sequence			Ion	C. I. %	Modification						Rank	Result Type
							Seq.	Seq.				Score
		895.416		895.454	0.0381	43	349	355	VYDDEVR												Mascot
		940.468		940.501	0.0339	36	300	306	FYWAPTR												Mascot
		940.468		940.501	0.0339	36	300	306	FYWAPTR												Mascot
Project 1\Sample project20170120\R17064-6				940.501																37	Mascot	of	73
		972.526		972.498	-0.0279	-29	357	365	WAVGVGVER												Mascot
		1171.58		1171.59	0.0091	8	169	178	SFQCELVFAK												Mascot
		1228.6		1228.64	0.0367	30	169	178	SFQCELVFAK					Carbamidomethyl (C)[4]							Mascot
		1882.97		1883.03	0.0593	31	330	346	LVDTFPGQSIDFFGALR												Mascot
		1882.97		1883.03	0.0593	31	330	346	LVDTFPGQSIDFFGALR			59	99.991								Mascot
		2089.17		2089.23	0.0637	30	275	293	VPIIVTGNDFSTLYAPLIR												Mascot
		2089.17		2089.23	0.0637	30	275	293	VPIIVTGNDFSTLYAPLIR			46	99.84								Mascot
		2320.06		2320.08	0.018	8	179	201	MGINPIMMSAGELESGN					Oxidation (M)[1]							Mascot
									AGEPAK
		2352.05		2352.1	0.0498	21	179	201	MGINPIMMSAGELESGN					Oxidation (M)[1,7,8]							Mascot
									AGEPAK
	5	RuBisCO activase, partial [Cucumis sativus]										ABO36654.1		12551.5	5.51		3	72	99.67		59	99.991
		Peptide Information
		Calc. Mass		Obsrv. Mass	± da	± ppm	Start	End	Sequence			Ion	C. I. %	Modification						Rank	Result Type
							Seq.	Seq.				Score
		895.416		895.454	0.0381	43	47	53	VYDDEVR												Mascot
		972.526		972.498	-0.0279	-29	55	63	WAVGVGVER												Mascot
		1882.97		1883.03	0.0593	31	28	44	LVDTFPGQSIDFFGALR												Mascot
		1882.97		1883.03	0.0593	31	28	44	LVDTFPGQSIDFFGALR			59	99.991								Mascot
	6	chloroplast rubisco activase, partial [Cucumis sativus]										ABK55669.1		16525.2	8.49		4	64	98.01		46	99.84
		Peptide Information
		Calc. Mass		Obsrv. Mass	± da	± ppm	Start	End	Sequence			Ion	C. I. %	Modification						Rank	Result Type
							Seq.	Seq.				Score
		940.468		940.501	0.0339	36	143	149	FYWAPTR												Mascot
		940.468		940.501	0.0339	36	143	149	FYWAPTR												Mascot
		1171.58		1171.59	0.0091	8	12	21	SFQCELVFAK												Mascot
		1228.6		1228.64	0.0367	30	12	21	SFQCELVFAK					Carbamidomethyl (C)[4]							Mascot
		2089.17		2089.23	0.0637	30	118	136	VPIIVTGNDFSTLYAPLIR												Mascot
		2089.17		2089.23	0.0637	30	118	136	VPIIVTGNDFSTLYAPLIR			46	99.84								Mascot
		2320.06		2320.08	0.018	8	22	44	MGINPIMMSAGELESGN					Oxidation (M)[1]							Mascot
									AGEPAK
		2352.05		2352.1	0.0498	21	22	44	MGINPIMMSAGELESGN					Oxidation (M)[1,7,8]							Mascot
									AGEPAK
	7	hypothetical protein Csa_2G431070 [Cucumis sativus]										KGN63337.1		50788.2	6.48		12	40	0
		Protein Group
		PREDICTED: benzyl alcohol O-benzoyltransferase-like										XP_004151058.1		50788.2		6.48
		[Cucumis sativus]														190
																7349
Project 1\Sample project20170120\R17064-6																				38	of	73
		Peptide Information
		Calc. Mass		Obsrv. Mass	± da	± ppm	Start	End	Sequence			Ion	C. I. %	Modification						Rank	Result Type
							Seq.	Seq.				Score
		834.377		834.34	-0.0379	-45	55	62	MAGTDPAR					Oxidation (M)[1]							Mascot
		949.529		949.467	-0.062	-65	152	160	CGGFILALR												Mascot
		1118.64		1118.56	-0.0782	-70	284	293	VLCIVNSRSK												Mascot
		1129.65		1129.58	-0.0645	-57	433	442	ELDALLKAEK												Mascot
		1158.63		1158.63	-0.0013	-1	55	65	MAGTDPARVIK												Mascot
		1310.73		1310.71	-0.0194	-15	41	50	FQIPVIQFYR												Mascot
		1679.92		1679.84	-0.075	-45	392	408	GGVGAIPGVASFYIPFK												Mascot
		1679.92		1679.84	-0.075	-45	392	408	GGVGAIPGVASFYIPFK												Mascot
		1699.79		1699.87	0.0724	43	255	268	QCSSFEVLTACLWR					Carbamidomethyl (C)[2]							Mascot
		1901.05		1901.02	-0.0305	-16	443	459	SIDRVENQKPLFIASAL												Mascot
		2063.16		2063.12	-0.0422	-20	184	202	GATAPSVRPVWQRALLN												Mascot
									AR
		2089.1		2089.23	0.1284	61	345	362	SVADLMMIKGRPHFTVV					Oxidation (M)[6,7]							Mascot
									R
		2089.13		2089.23	0.1028	49	354	371	GRPHFTVVRSYLVSDVT												Mascot
									R
	8	hypothetical protein Csa_1G595871 [Cucumis sativus]										KGN66284.1		80088.3	5.56		15	40	0
		Peptide Information
		Calc. Mass		Obsrv. Mass	± da	± ppm	Start	End	Sequence			Ion	C. I. %	Modification						Rank	Result Type
							Seq.	Seq.				Score
		895.452		895.454	0.0017	2	360	367	SALSNFEK												Mascot
		940.51		940.501	-0.0084	-9	652	659	LEATHLEK												Mascot
		940.51		940.501	-0.0084	-9	652	659	LEATHLEK												Mascot
		1022.48		1022.57	0.0888	87	462	469	EEFELAER												Mascot
		1102.6		1102.57	-0.0293	-27	25	34	DASDILDILK												Mascot
		1148.68		1148.61	-0.0708	-62	524	533	KVTSLFNLAR												Mascot
		1320.75		1320.65	-0.0954	-72	201	211	LGIGLCRYQLK					Carbamidomethyl (C)[6]							Mascot
		1479.75		1479.84	0.0919	62	490	503	CPAIEASASVLQYK												Mascot
		1554.86		1554.86	-0.0032	-2	381	394	VLGHIYVQLGQAEK												Mascot
		1653.82		1653.83	0.005	3	504	516	DVELFYQLEREGR												Mascot
		1882.87		1883.03	0.1617	86	1	16	MACVYIPVQNSEEEVR					Oxidation (M)[1]							Mascot
		1882.87		1883.03	0.1617	86	1	16	MACVYIPVQNSEEEVR					Oxidation (M)[1]							Mascot
		1889.02		1888.97	-0.0505	-27	550	564	LILFKYPDYVDAYLR												Mascot
		1922.82		1922.99	0.1666	87	687	700	SQWFIHYPCMVEYF					Carbamidomethyl (C)[9], Oxidation (M)[10]							Mascot
		1950.07		1950.01	-0.0551	-28	135	152	GQLLLTKGEVEQAFAAFK												Mascot
Project 1\Sample project20170120\R17064-6																				39	of	73
		1995.11		1995.04	-0.0765	-38	17	34	VALDQLPRDASDILDILK												Mascot
		2239.22		2239.19	-0.0271	-12	381	400	VLGHIYVQLGQAEKAQES												Mascot
									LR
	9	PREDICTED: petal death protein [Cucumis sativus]										XP_004152091.1		53582.8	7.63		12	40	0
		Protein Group
		PREDICTED: petal death protein [Cucumis sativus]										XP_011653064.1		53582.8		7.63
																1144
																4092
		hypothetical protein Csa_4G017030 [Cucumis sativus]										KGN53115.1		53582.8		7.63
																1144
																4092
		Peptide Information
		Calc. Mass		Obsrv. Mass	± da	± ppm	Start	End	Sequence			Ion	C. I. %	Modification						Rank	Result Type
							Seq.	Seq.				Score
		886.395		886.338	-0.0564	-64	193	200	ACGHTQGR					Carbamidomethyl (C)[2]							Mascot
		914.349		914.434	0.0855	94	409	416	SYDDDGSR												Mascot
		1261.69		1261.68	-0.0019	-2	373	383	VDSSITSLQRR												Mascot
		1567.84		1567.79	-0.0497	-32	9	23	DGSLTLPLSHTASLR												Mascot
		1746.9		1747	0.1011	58	292	306	TPILNPLELEEMGFK					Oxidation (M)[12]							Mascot
		1774.92		1774.95	0.0364	21	331	347	GGRLPSPGTLPTFAEMK					Oxidation (M)[16]							Mascot
		1794.93		1794.86	-0.0693	-39	249	266	AFADAGADVLFIDALASK												Mascot
		1796.94		1796.94	-0.0006	0	46	61	GNISLSNNPYHKPLSR												Mascot
		1900.98		1901.02	0.0423	22	391	408	GQGSQGPAVEVITPEIYR												Mascot
		2256.13		2256.14	0.0141	6	84	104	RILEMPGVHQGPACFDA					Oxidation (M)[5]							Mascot
									LSAK
		2352.18		2352.1	-0.0794	-34	105	125	LVERAGFLYCFTSGFSIS					Carbamidomethyl (C)[10]							Mascot
									AAR
		2748.29		2748.4	0.1069	39	249	274	AFADAGADVLFIDALASK												Mascot
									DEMEAFCK
	10	PREDICTED: RNA polymerase-associated protein										XP_011660015.1		123217	5.48		19	38	0
		CTR9 homolog [Cucumis sativus]
		Peptide Information
		Calc. Mass		Obsrv. Mass	± da	± ppm	Start	End	Sequence			Ion	C. I. %	Modification						Rank	Result Type
							Seq.	Seq.				Score
		895.452		895.454	0.0017	2	360	367	SALSNFEK												Mascot
		940.51		940.501	-0.0084	-9	652	659	LEATHLEK												Mascot
		940.51		940.501	-0.0084	-9	652	659	LEATHLEK												Mascot
		972.511		972.498	-0.0127	-13	882	890	QVALAEDAR												Mascot
		1022.48		1022.57	0.0888	87	462	469	EEFELAER												Mascot
		1055.51		1055.6	0.0848	80	736	743	MYQNCLRK												Mascot
		1102.6		1102.57	-0.0293	-27	25	34	DASDILDILK												Mascot
Project 1\Sample project20170120\R17064-6				1102.57																40	Mascot	of	73
		1148.68		1148.61	-0.0708	-62	524	533	KVTSLFNLAR												Mascot
		1163.59		1163.65	0.0633	54	844	853	KIDTHVGYCK												Mascot
		1320.75		1320.65	-0.0954	-72	201	211	LGIGLCRYQLK					Carbamidomethyl (C)[6]							Mascot
		1479.75		1479.84	0.0919	62	490	503	CPAIEASASVLQYK												Mascot
		1491.66		1491.78	0.1254	84	1064	1077	ENSAGLEDSDGEIR												Mascot
		1554.86		1554.86	-0.0032	-2	381	394	VLGHIYVQLGQAEK												Mascot
		1653.82		1653.83	0.005	3	504	516	DVELFYQLEREGR												Mascot
		1839.06		1838.97	-0.0875	-48	772	787	TLLRAIHLAPSNYTLR												Mascot
		1882.87		1883.03	0.1617	86	1	16	MACVYIPVQNSEEEVR					Oxidation (M)[1]							Mascot
		1882.87		1883.03	0.1617	86	1	16	MACVYIPVQNSEEEVR					Oxidation (M)[1]							Mascot
		1889.02		1888.97	-0.0505	-27	550	564	LILFKYPDYVDAYLR												Mascot
		1950.07		1950.01	-0.0551	-28	135	152	GQLLLTKGEVEQAFAAFK												Mascot
		1995.11		1995.04	-0.0765	-38	17	34	VALDQLPRDASDILDILK												Mascot
		2239.22		2239.19	-0.0271	-12	381	400	VLGHIYVQLGQAEKAQES												Mascot
									LR
Project 1\Sample project20170120\R17064-6																				41	of	73
Gel Idx/Pos			319/M21						Instr./Gel Origin		BA2151/Sample Project 20170120					Process Status			Analysis Succeeded
Plate [#] Name			[1] Sample Project 20170120						Instrument Sample Name							Spectra			11
Rank		Protein Name						Species				Accession No.		Protein MW		Protein	Pep.	Protein	Protein		Total Ion	Total Ion
																PI	Count	Score	Score		Score	C. I. %
																			C. I. %
	1	hypothetical protein Csa_6G448720 [Cucumis sativus]										KGN48214.1		67198.9	6.22		22	206	100		106	100
		Protein Group
		PREDICTED: threonine dehydratase biosynthetic,										XP_004143369.1		67198.9		6.2199
		chloroplastic-like [Cucumis sativus]														997901
																9165
		Peptide Information
		Calc. Mass		Obsrv. Mass	± da	± ppm	Start	End	Sequence			Ion	C. I. %	Modification						Rank	Result Type
							Seq.	Seq.				Score
		964.448		964.48	0.0321	33	351	358	QVGDENFR												Mascot
		1013.54		1013.56	0.0186	18	108	115	RPEVIDER												Mascot
		1197.59		1197.63	0.045	38	531	540	SSVPNEVFYR												Mascot
		1197.59		1197.63	0.045	38	531	540	SSVPNEVFYR			24	61.637								Mascot
		1201.65		1201.68	0.0344	29	561	569	WNISLIHYR												Mascot
		1219.56		1219.61	0.0421	35	157	166	DDSQFVFSFK												Mascot
		1375.66		1375.71	0.0482	35	156	166	RDDSQFVFSFK												Mascot
		1375.66		1375.71	0.0482	35	156	166	RDDSQFVFSFK												Mascot
		1397.8		1397.81	0.0065	5	388	402	SILEPAGALSIAGAK												Mascot
		1489.77		1489.79	0.0228	15	94	107	DLQYPAGMLGAIPK					Oxidation (M)[8]							Mascot
		1521.81		1521.86	0.0525	34	547	560	SGALLQFLDAFSPR												Mascot
		1521.81		1521.86	0.0525	34	547	560	SGALLQFLDAFSPR			17	0								Mascot
		1529.74		1529.78	0.0423	28	503	515	IESSPFETYDLTK												Mascot
		1574.84		1574.89	0.0508	32	129	142	VYDVAIESPLELAR												Mascot
		1574.84		1574.89	0.0508	32	129	142	VYDVAIESPLELAR			30	91.529								Mascot
		1657.83		1657.86	0.0275	17	502	515	KIESSPFETYDLTK												Mascot
		1680.9		1681.03	0.1377	82	598	613	KLGFGYVVVSNDPASK												Mascot
		1755.8		1755.95	0.148	84	373	387	DAIAACIKDMFEDTR					Carbamidomethyl (C)[6]							Mascot
		1823.88		1823.95	0.0742	41	169	184	GAYNMMANLPKEALER					Oxidation (M)[5]							Mascot
		1879.96		1880.02	0.0604	32	185	204	GVICASAGNHAQGVALA					Carbamidomethyl (C)[4]							Mascot
									AGR
		1940.99		1940.97	-0.0117	-6	531	546	SSVPNEVFYRFTLPER												Mascot
		2056.14		2056.09	-0.0452	-22	362	380	ELIDGIVLVDKDAIAACIK					Carbamidomethyl (C)[17]							Mascot
		2252.07		2252.14	0.0742	33	227	247	SLGGNVLLHGDTFDDAQ												Mascot
									EHAR
		2252.07		2252.14	0.0742	33	227	247	SLGGNVLLHGDTFDDAQ			35	97.195								Mascot
Project 1\Sample project20170120\R17064-6				2252.14																42	Mascot	of	73
									EHAR
		2327.29		2327.33	0.0393	17	283	306	GPLHAIFVPVGGGGLLAG												Mascot
									VASFYK
		2798.44		2798.53	0.0944	34	254	279	NLTIIPPFDNEDVIIGQGT												Mascot
									VGMEIGR
		2814.43		2814.51	0.0767	27	254	279	NLTIIPPFDNEDVIIGQGT					Oxidation (M)[22]							Mascot
									VGMEIGR
		2884.43		2884.53	0.0927	32	571	597	QGIISADVLVGLQIEGSEE												Mascot
									AEFHESAR
	2	hypothetical protein Csa_6G194680 [Cucumis sativus]										KGN47184.1		28147.9	4.61		12	56	86.546
		Peptide Information
		Calc. Mass		Obsrv. Mass	± da	± ppm	Start	End	Sequence			Ion	C. I. %	Modification						Rank	Result Type
							Seq.	Seq.				Score
		840.457		840.454	-0.0033	-4	154	160	ISHLNEK												Mascot
		925.474		925.484	0.0098	11	86	93	SETPQVHK												Mascot
		1004.58		1004.54	-0.0405	-40	65	73	FLIDLNAAK												Mascot
		1185.55		1185.64	0.0894	75	19	28	FDDDLSSKMK												Mascot
		1558.82		1558.77	-0.0514	-33	140	153	FNKIELHGSVTGEK												Mascot
		1612.93		1612.86	-0.0676	-42	100	113	VRIVELLETVGEQK												Mascot
		1755.93		1755.95	0.0245	14	29	44	VYVVVSVTSGVFSEQR												Mascot
		1823.95		1823.95	0.0007	0	59	73	WNFPMKFLIDLNAAK					Oxidation (M)[5]							Mascot
		1940.9		1940.97	0.0735	38	2	18	DLMSLEMCVESAEDLKK												Mascot
		1991.06		1991.02	-0.0357	-18	143	160	IELHGSVTGEKISHLNEK												Mascot
		2071.94		2072.05	0.113	55	1	18	MDLMSLEMCVESAEDLK												Mascot
									K
		2327.16		2327.33	0.1709	73	114	133	SMRYISRPIMDTLGQTTN					Oxidation (M)[2]							Mascot
									AR
	3	hypothetical protein Csa_1G673520 [Cucumis sativus]										KGN66745.1		81445.5	9.9		16	45	0
		Peptide Information
		Calc. Mass		Obsrv. Mass	± da	± ppm	Start	End	Sequence			Ion	C. I. %	Modification						Rank	Result Type
							Seq.	Seq.				Score
		1004.53		1004.54	0.0065	6	102	109	EILNMGRR					Oxidation (M)[5]							Mascot
		1201.66		1201.68	0.0245	20	603	612	VLVSEAWIER												Mascot
		1275.68		1275.77	0.0837	66	98	108	SLAREILNMGR					Oxidation (M)[9]							Mascot
		1388.73		1388.73	0.0038	3	438	450	DDIKLSVEEGGVK												Mascot
		1397.69		1397.81	0.1116	80	317	328	NSLEVELGDFFK												Mascot
		1489.72		1489.79	0.0745	50	484	496	QENPDVVISMETK												Mascot
		1536.94		1536.9	-0.0387	-25	110	124	EILALLLGPGIATQK												Mascot
		1612.79		1612.86	0.0652	40	498	510	SEFCSWRIASIWK												Mascot
		1645.84		1645.86	0.0145	9	21	34	LDLDLGTLTWVEDR												Mascot
Project 1\Sample project20170120\R17064-6																				43	of	73
		1661.82		1661.85	0.0364	22	484	497	QENPDVVISMETKR					Oxidation (M)[10]							Mascot
		1661.82		1661.85	0.0364	22	484	497	QENPDVVISMETKR					Oxidation (M)[10]							Mascot
		1669.82		1669.87	0.054	32	498	510	SEFCSWRIASIWK					Carbamidomethyl (C)[4]							Mascot
		1740.86		1740.91	0.0503	29	624	637	VTWNHWPLMLTNGR					Oxidation (M)[9]							Mascot
		1755.81		1755.95	0.1435	82	195	208	FYVGWGEEKENQNR												Mascot
		1880		1880.02	0.016	9	693	707	QQFLMLRGVFWLEGR												Mascot
		1990.99		1991.02	0.0296	15	18	34	CGKLDLDLGTLTWVEDR					Carbamidomethyl (C)[1]							Mascot
		2633.47		2633.56	0.0872	33	523	546	GLSSGILALWNLRLCVAIE					Carbamidomethyl (C)[15]							Mascot
									VVHGR
		2867.41		2867.5	0.095	33	249	273	VDELFFKSFFGCSQEILV												Mascot
									SNPSAFR
	4	hypothetical protein Csa_5G585420 [Cucumis sativus]										KGN51615.1		115335	6.32		19	43	0
		Peptide Information
		Calc. Mass		Obsrv. Mass	± da	± ppm	Start	End	Sequence			Ion	C. I. %	Modification						Rank	Result Type
							Seq.	Seq.				Score
		840.505		840.454	-0.051	-61	57	63	LVHSTKR												Mascot
		964.521		964.48	-0.0406	-42	884	891	GREAYLQK												Mascot
		1013.53		1013.56	0.0298	29	658	667	GPAQDDVIAK												Mascot
		1202.58		1202.62	0.0335	28	775	783	VENYFFDIR												Mascot
		1284.71		1284.73	0.0251	20	487	497	AVVVEISRMHK					Oxidation (M)[9]							Mascot
		1375.69		1375.71	0.0271	20	318	328	DIHYTVDEKQK												Mascot
		1375.69		1375.71	0.0271	20	318	328	DIHYTVDEKQK												Mascot
		1611.96		1611.87	-0.0944	-59	457	470	LKVTIVPTNKPMVR					Oxidation (M)[12]							Mascot
		1657.99		1657.86	-0.1293	-78	180	195	TLVAILPAYLNALTGK												Mascot
		1746.9		1746.93	0.0332	19	210	224	DCEWVGQVPRFLGLK												Mascot
		1788.99		1788.98	-0.0051	-3	63	80	RNAGPVASLGGFLGGIFR												Mascot
		1809.83		1809.96	0.1293	71	609	624	VNESLFPCDLSSENAK					Carbamidomethyl (C)[8]							Mascot
		1823.88		1823.95	0.0676	37	651	667	LSYSCEKGPAQDDVIAK												Mascot
		1864.96		1865	0.0404	22	382	397	EVLIVDEFTGRVMQGR					Oxidation (M)[13]							Mascot
		1893.93		1894.03	0.096	51	311	326	LASAFERDIHYTVDEK												Mascot
		1985.99		1986.08	0.083	42	949	964	LEGYNLFLDMMAQIRR					Oxidation (M)[10]							Mascot
		2225.05		2225.17	0.1133	51	606	624	TWKVNESLFPCDLSSEN					Carbamidomethyl (C)[11]							Mascot
									AK
		2284.19		2284.23	0.0325	14	123	143	ERAQSGEPLDSILPEAFA												Mascot
									VVR
		2331.21		2331.23	0.0261	11	539	561	EAEIVAQSGRLGAVTIAT					Oxidation (M)[20]							Mascot
									NMAGR
		2814.37		2814.51	0.1382	49	90	115	QQYASTVAVINGFEAQM												Mascot
									SALSDSQLR
	5	PREDICTED: protein translocase subunit SecA,										XP_011655538.1		115522	6.16		19	43	0
		chloroplastic [Cucumis sativus]
Project 1\Sample project20170120\R17064-6																				44	of	73
		Peptide Information
		Calc. Mass		Obsrv. Mass	± da	± ppm	Start	End	Sequence			Ion	C. I. %	Modification						Rank	Result Type
							Seq.	Seq.				Score
		840.505		840.454	-0.051	-61	57	63	LVHSTKR												Mascot
		964.521		964.48	-0.0406	-42	886	893	GREAYLQK												Mascot
		1013.53		1013.56	0.0298	29	660	669	GPAQDDVIAK												Mascot
		1202.58		1202.62	0.0335	28	777	785	VENYFFDIR												Mascot
		1284.71		1284.73	0.0251	20	489	499	AVVVEISRMHK					Oxidation (M)[9]							Mascot
		1375.69		1375.71	0.0271	20	320	330	DIHYTVDEKQK												Mascot
		1375.69		1375.71	0.0271	20	320	330	DIHYTVDEKQK												Mascot
		1611.96		1611.87	-0.0944	-59	459	472	LKVTIVPTNKPMVR					Oxidation (M)[12]							Mascot
		1657.99		1657.86	-0.1293	-78	180	195	TLVAILPAYLNALTGK												Mascot
		1746.9		1746.93	0.0332	19	210	224	DCEWVGQVPRFLGLK												Mascot
		1788.99		1788.98	-0.0051	-3	63	80	RNAGPVASLGGFLGGIFR												Mascot
		1809.83		1809.96	0.1293	71	611	626	VNESLFPCDLSSENAK					Carbamidomethyl (C)[8]							Mascot
		1823.88		1823.95	0.0676	37	653	669	LSYSCEKGPAQDDVIAK												Mascot
		1864.96		1865	0.0404	22	384	399	EVLIVDEFTGRVMQGR					Oxidation (M)[13]							Mascot
		1893.93		1894.03	0.096	51	313	328	LASAFERDIHYTVDEK												Mascot
		1985.99		1986.08	0.083	42	951	966	LEGYNLFLDMMAQIRR					Oxidation (M)[10]							Mascot
		2225.05		2225.17	0.1133	51	608	626	TWKVNESLFPCDLSSEN					Carbamidomethyl (C)[11]							Mascot
									AK
		2284.19		2284.23	0.0325	14	123	143	ERAQSGEPLDSILPEAFA												Mascot
									VVR
		2331.21		2331.23	0.0261	11	541	563	EAEIVAQSGRLGAVTIAT					Oxidation (M)[20]							Mascot
									NMAGR
		2814.37		2814.51	0.1382	49	90	115	QQYASTVAVINGFEAQM												Mascot
									SALSDSQLR
	6	hypothetical protein Csa_1G024810 [Cucumis sativus]										KGN63849.1		137012	8.93		21	43	0
		Protein Group
		PREDICTED: ATP-dependent RNA helicase DHX36										XP_004137549.2		137012		8.93
		[Cucumis sativus]														3051
																7578
		Peptide Information
		Calc. Mass		Obsrv. Mass	± da	± ppm	Start	End	Sequence			Ion	C. I. %	Modification						Rank	Result Type
							Seq.	Seq.				Score
		860.488		860.484	-0.0034	-4	74	80	WVEVSLK												Mascot
		947.531		947.455	-0.0754	-80	310	317	SLPAFKER												Mascot
		1110.58		1110.55	-0.0266	-24	1046	1054	ELDELVHQK												Mascot
		1185.57		1185.64	0.067	57	856	865	DCSDHLALVR					Carbamidomethyl (C)[2]							Mascot
Project 1\Sample project20170120\R17064-6																				45	of	73
		1375.64		1375.71	0.0734	53	1204	1215	NTNPSFHSAKWS												Mascot
		1375.64		1375.71	0.0734	53	1204	1215	NTNPSFHSAKWS												Mascot
		1489.78		1489.79	0.0189	13	428	440	GVSHVIVDEIHER												Mascot
		1521.77		1521.86	0.0895	59	371	384	ISAMSVSERVAAER					Oxidation (M)[4]							Mascot
		1521.77		1521.86	0.0895	59	371	384	ISAMSVSERVAAER					Oxidation (M)[4]							Mascot
		1651.85		1651.89	0.0464	28	1060	1073	LDMEPHNELLTALR												Mascot
		1657.78		1657.86	0.0837	50	2	14	PYSSSFFNSYFRR												Mascot
		1680.97		1681.03	0.0676	40	209	222	RPQREVVLPFGVQR												Mascot
		1746.85		1746.93	0.0816	47	623	638	VLLLACHGSMASSEQK					Carbamidomethyl (C)[6], Oxidation (M)[10]							Mascot
		1788.82		1788.98	0.1654	92	1	14	MPYSSSFFNSYFRR												Mascot
		1838.91		1838.97	0.0608	33	850	865	AHFAARDCSDHLALVR					Carbamidomethyl (C)[8]							Mascot
		1985.93		1986.08	0.1512	76	94	110	NIAFPFGQHQSSYNYGR												Mascot
		2062.08		2062.11	0.0269	13	932	950	AVICAGLFPGICSVVNKE					Carbamidomethyl (C)[4,12]							Mascot
									K
		2252.09		2252.14	0.053	24	678	697	ETSYDALNNTPCLLPSWI												Mascot
									SK
		2252.09		2252.14	0.053	24	678	697	ETSYDALNNTPCLLPSWI												Mascot
									SK
		2331.22		2331.23	0.0122	5	318	340	EALLKAISENQVVVVSGE												Mascot
									TGCGK
		2584.27		2584.44	0.1665	64	1142	1164	NNQFRSTVIFNGLNFVGQ					Carbamidomethyl (C)[20]							Mascot
									PCGSK
		2633.42		2633.56	0.1352	51	809	832	MLILGAIFNCLDPIMTIVA					Carbamidomethyl (C)[10], Oxidation (M)[1]							Mascot
									GLSVR
		2734.31		2734.44	0.1379	50	951	975	SVALKTMEDGQVMLYSN					Oxidation (M)[7,13]							Mascot
									SVNAGYPK
		2867.49		2867.5	0.0129	4	651	677	IVLATNMAETSITINDVVF					Oxidation (M)[7]							Mascot
									VVDCGKAK
	7	U-box domain-containing protein 27 [Cucumis sativus]										KGN48372.1		44762.7	8.2		12	41	0
		Protein Group
		PREDICTED: U-box domain-containing protein 27-like										XP_004148672.1		44762.7		8.1999
		[Cucumis sativus]														998092
																6514
		Peptide Information
		Calc. Mass		Obsrv. Mass	± da	± ppm	Start	End	Sequence			Ion	C. I. %	Modification						Rank	Result Type
							Seq.	Seq.				Score
		947.479		947.455	-0.0238	-25	163	170	TEIGDKER												Mascot
		1228.76		1228.67	-0.0883	-72	181	191	NSISSLLLILR												Mascot
		1284.83		1284.73	-0.0905	-70	261	272	LVQLGVIKSVTK												Mascot
		1397.67		1397.81	0.1334	95	25	37	SPVSLCTGVTYDR												Mascot
		1465.7		1465.8	0.0998	68	4	15	DDLCITIPTDFR					Carbamidomethyl (C)[4]							Mascot
		1661.84		1661.85	0.0112	7	304	319	TEIGEDSVCVAAIVQK												Mascot
		1661.84		1661.85	0.0112	7	304	319	TEIGEDSVCVAAIVQK												Mascot
Project 1\Sample project20170120\R17064-6																				46	of	73
		1823.9		1823.95	0.0489	27	1	15	MVKDDLCITIPTDFR					Carbamidomethyl (C)[7]							Mascot
		1893.96		1894.03	0.0676	36	199	215	ICSANLLEYLAIDAEAK					Carbamidomethyl (C)[2]							Mascot
		1940.97		1940.97	0.0003	0	25	42	SPVSLCTGVTYDRSSIQK												Mascot
		1991.02		1991.02	0.0007	0	108	125	ADSLPRLLSFASESLDNR												Mascot
		2073.08		2073.03	-0.0516	-25	360	377	ILLLMQSNCSPPVRQMA					Oxidation (M)[5]							Mascot
									R
		2734.33		2734.44	0.1152	42	38	61	SSIQKWLDNGNNTCPAT					Carbamidomethyl (C)[14]							Mascot
									MQVLQTK
		2750.32		2750.43	0.1079	39	38	61	SSIQKWLDNGNNTCPAT					Carbamidomethyl (C)[14], Oxidation (M)[18]							Mascot
									MQVLQTK
	8	hypothetical protein Csa_4G036600 [Cucumis sativus]										KGN53240.1		45734.7	9.88		12	41	0
		Peptide Information
		Calc. Mass		Obsrv. Mass	± da	± ppm	Start	End	Sequence			Ion	C. I. %	Modification						Rank	Result Type
							Seq.	Seq.				Score
		1004.57		1004.54	-0.03	-30	84	92	AVSIMATRR												Mascot
		1015.55		1015.58	0.0234	23	93	101	GIQSTEKPR												Mascot
		1110.59		1110.55	-0.034	-31	286	295	LICSFGITEK												Mascot
		1165.59		1165.65	0.0615	53	300	309	MFNSAPVLMR												Mascot
		1197.58		1197.63	0.0594	50	300	309	MFNSAPVLMR					Oxidation (M)[1,9]							Mascot
		1197.58		1197.63	0.0594	50	300	309	MFNSAPVLMR					Oxidation (M)[1,9]							Mascot
		1596.83		1596.87	0.0444	28	220	233	SCGIVDYQLSTLLK					Carbamidomethyl (C)[2]							Mascot
		1645.77		1645.86	0.0831	50	286	299	LICSFGITEKECMR					Oxidation (M)[13]							Mascot
		1669.84		1669.87	0.0295	18	300	314	MFNSAPVLMRTSVGK					Oxidation (M)[1,9]							Mascot
		1684.78		1684.84	0.0621	37	296	309	ECMRMFNSAPVLMR												Mascot
		1746.97		1746.93	-0.042	-24	119	134	SAVRITPQIAFSSIEK												Mascot
		1866		1866.03	0.0325	17	106	122	YLSDLGLSDTQIKSAVR												Mascot
		2072.96		2073.03	0.0676	33	331	347	SDIVRNPFCLMHAMHGR					Carbamidomethyl (C)[9], Oxidation (M)[11,14]							Mascot
		2083.11		2083.08	-0.0334	-16	163	180	FFSSSLEKTLMPNVEILK												Mascot
	9	phenylalanine ammonia lyase 1, partial [Cucumis										AAL84767.1		43811.6	5.77		11	40	0
		sativus]
		Peptide Information
		Calc. Mass		Obsrv. Mass	± da	± ppm	Start	End	Sequence			Ion	C. I. %	Modification						Rank	Result Type
							Seq.	Seq.				Score
		1004.61		1004.54	-0.0768	-76	246	253	LFEKNLLK												Mascot
		1375.71		1375.71	0.0051	4	382	393	MINSILECLPAR					Oxidation (M)[1]							Mascot
		1375.71		1375.71	0.0051	4	382	393	MINSILECLPAR					Oxidation (M)[1]							Mascot
		1463.8		1463.79	-0.0187	-13	21	32	KLHEMDPLQKPK												Mascot
		1479.8		1479.84	0.0441	30	21	32	KLHEMDPLQKPK					Oxidation (M)[5]							Mascot
Project 1\Sample project20170120\R17064-6				1479.84																47	Mascot	of	73
		1529.82		1529.78	-0.0385	-25	382	395	MINSILECLPARAV												Mascot
		1684.85		1684.84	-0.0089	-5	62	76	EINSVNDNPLIDVSR												Mascot
		1788.9		1788.98	0.0769	43	357	372	LLTGEKVISPGEECEK					Carbamidomethyl (C)[14]							Mascot
		1865.88		1866.03	0.152	81	1	17	EAAAIMEHILDGSSYMK												Mascot
		1879.93		1880.02	0.0868	46	363	379	VISPGEECEKVFAALCK					Carbamidomethyl (C)[8]							Mascot
		1881.87		1882.01	0.1411	75	1	17	EAAAIMEHILDGSSYMK					Oxidation (M)[6]							Mascot
		1926.99		1927.07	0.0773	40	62	78	EINSVNDNPLIDVSRNK												Mascot
		2056.16		2056.09	-0.0681	-33	40	57	TAPQWLGPLIEVIRFSTK												Mascot
		2072		2072.05	0.0571	28	79	98	ALHGGNFQGTPIGVSMD												Mascot
									NTR
	10	hypothetical protein Csa_7G434950 [Cucumis sativus]										KGN45318.1		30398.4	5.45		9	38	0
		Peptide Information
		Calc. Mass		Obsrv. Mass	± da	± ppm	Start	End	Sequence			Ion	C. I. %	Modification						Rank	Result Type
							Seq.	Seq.				Score
		1015.58		1015.58	-0.0018	-2	56	63	ELREEVLK												Mascot
		1145.62		1145.56	-0.0556	-49	67	75	ELFELPIER												Mascot
		1202.58		1202.62	0.0414	34	149	158	MIFESYGVEK												Mascot
		1388.78		1388.73	-0.0478	-34	11	22	LPVINFSDEKVK												Mascot
		1390.6		1390.73	0.1256	90	38	49	EAMEEYGCFIAK												Mascot
		1661.83		1661.85	0.025	15	145	158	MVTKMIFESYGVEK												Mascot
		1661.83		1661.85	0.025	15	145	158	MVTKMIFESYGVEK												Mascot
		1893.9		1894.03	0.1291	68	178	194	APQSPDPTLCLVDHTDK					Carbamidomethyl (C)[10]							Mascot
		2056.09		2056.09	0.0046	2	159	175	YYNSHADSITYLLRVLK												Mascot
		2225.13		2225.17	0.0405	18	195	213	SFTTMVYQDHINGLELKT												Mascot
									K
Project 1\Sample project20170120\R17064-6																				48	of	73
Gel Idx/Pos			321/M23						Instr./Gel Origin		BA2151/Sample Project 20170120					Process Status			Analysis Succeeded
Plate [#] Name			[1] Sample Project 20170120						Instrument Sample Name							Spectra			11
Rank		Protein Name						Species				Accession No.		Protein MW		Protein	Pep.	Protein	Protein		Total Ion	Total Ion
																PI	Count	Score	Score		Score	C. I. %
																			C. I. %
	1	hypothetical protein Csa_5G198220 [Cucumis sativus]										KGN50632.1		42075.4	5.96		18	250	100		157	100
		Protein Group
		sedoheptulose-1,7-bisphosphatase [Cucumis sativus]										ACQ82818.1		42075.4		5.96
																381
																4697
		sedoheptulose-1,7-bisphosphatase, chloroplastic-like										NP_001267658.1		42075.4		5.96
		[Cucumis sativus]														381
																4697
		Peptide Information
		Calc. Mass		Obsrv. Mass	± da	± ppm	Start	End	Sequence			Ion	C. I. %	Modification						Rank	Result Type
							Seq.	Seq.				Score
		841.366		841.395	0.0293	35	140	145	YSHFCK					Carbamidomethyl (C)[5]							Mascot
		861.519		861.556	0.0371	43	133	139	LLFEALR												Mascot
		869.375		869.413	0.038	44	332	340	AGGYSSDGR												Mascot
		903.505		903.541	0.0361	40	254	261	LFSPGNLR												Mascot
		903.505		903.541	0.0361	40	254	261	LFSPGNLR			22	30.127								Mascot
		912.519		912.546	0.0272	30	272	278	LINYYVK												Mascot
		987.511		987.548	0.0372	38	347	354	VIENLDER												Mascot
		1185.51		1185.55	0.0432	36	262	271	ATFDNPDYDK												Mascot
		1188.55		1188.6	0.0452	38	368	377	FEETLYGSSR												Mascot
		1188.55		1188.6	0.0452	38	368	377	FEETLYGSSR			14	0								Mascot
		1251.66		1251.7	0.0417	33	302	313	GIFTNVTSPSTK												Mascot
		1494.7		1494.75	0.0465	31	202	216	GSDQVAAAMGVYGPR					Oxidation (M)[9]							Mascot
		1494.7		1494.75	0.0465	31	202	216	GSDQVAAAMGVYGPR					Oxidation (M)[9]							Mascot
		1574.92		1574.96	0.042	27	318	331	LLFEVAPLGFLVEK												Mascot
		1574.92		1574.96	0.042	27	318	331	LLFEVAPLGFLVEK			22	28.828								Mascot
		1649.86		1649.89	0.0359	22	285	299	YTGGMVPDVNQIIVK					Oxidation (M)[5]							Mascot
		1649.86		1649.89	0.0359	22	285	299	YTGGMVPDVNQIIVK			16	0	Oxidation (M)[5]							Mascot
		1683.87		1683.86	-0.0091	-5	133	145	LLFEALRYSHFCK					Carbamidomethyl (C)[12]							Mascot
		1717.84		1717.9	0.0537	31	225	239	DFPGTHEFLLLDEGK												Mascot
		1717.84		1717.9	0.0537	31	225	239	DFPGTHEFLLLDEGK			83	100								Mascot
		1739.92		1739.89	-0.0293	-17	90	104	LLTCMGEALRTISFK					Carbamidomethyl (C)[4]							Mascot
		1844.1		1844.15	0.0485	26	316	331	LRLLFEVAPLGFLVEK												Mascot
Project 1\Sample project20170120\R17064-6																				49	of	73
		2079.01		2079.07	0.062	30	262	278	ATFDNPDYDKLINYYVK												Mascot
		2733.18		2733.26	0.0801	29	107	132	TASCGGTACVNSFGDEQ					Carbamidomethyl (C)[4,9], Oxidation (M)[22]							Mascot
									LAVDMLADK
	2	hypothetical protein Csa_4G293310 [Cucumis sativus]										KGN54221.1		39141.6	5.52		8	42	0		17	0
		Protein Group
		PREDICTED: diaminopimelate epimerase, chloroplastic										XP_004142088.1		39141.6		5.5199
		[Cucumis sativus]														999809
																2651
		Peptide Information
		Calc. Mass		Obsrv. Mass	± da	± ppm	Start	End	Sequence			Ion	C. I. %	Modification						Rank	Result Type
							Seq.	Seq.				Score
		876.451		876.364	-0.0865	-99	293	298	MRVWER												Mascot
		1039.52		1039.56	0.0362	35	65	73	APSFSFLDR												Mascot
		1289.68		1289.73	0.0469	36	161	171	FIAELENLQGR												Mascot
		1316.58		1316.63	0.0451	34	268	277	FEHHEMFPAR					Oxidation (M)[6]							Mascot
		1316.58		1316.63	0.0451	34	268	277	FEHHEMFPAR					Oxidation (M)[6]							Mascot
		1632.81		1632.87	0.0583	36	84	97	YHGLGNDFILVDNR												Mascot
		1632.81		1632.87	0.0583	36	84	97	YHGLGNDFILVDNR			17	0								Mascot
		1893.04		1893.09	0.0426	23	250	267	IEQNLQVDGINLAAIGPK												Mascot
		2231.13		2231.2	0.0745	33	299	322	GAGATLACGTGACAVVV					Carbamidomethyl (C)[8,13]							Mascot
									AAVLEGR
		2462.27		2462.32	0.0549	22	172	194	HSFTVHTGAGLIIPELQD												Mascot
									DGQVK
	3	hypothetical protein Csa_2G297260 [Cucumis sativus]										KGN62102.1		9837.8	5.44		6	40	0
		Peptide Information
		Calc. Mass		Obsrv. Mass	± da	± ppm	Start	End	Sequence			Ion	C. I. %	Modification						Rank	Result Type
							Seq.	Seq.				Score
		820.423		820.346	-0.0775	-94	32	39	SVGVAEMK												Mascot
		848.374		848.332	-0.042	-50	40	46	NESQNEK												Mascot
		882.388		882.365	-0.0228	-26	1	7	MAMLPCK					Carbamidomethyl (C)[6], Oxidation (M)[1,3]							Mascot
		891.454		891.38	-0.0741	-83	2	8	AMLPCKR					Carbamidomethyl (C)[5], Oxidation (M)[2]							Mascot
		949.478		949.409	-0.0686	-72	1	8	MAMLPCKR												Mascot
		1649.78		1649.89	0.1128	68	32	46	SVGVAEMKNESQNEK												Mascot
		1649.78		1649.89	0.1128	68	32	46	SVGVAEMKNESQNEK												Mascot
	4	hypothetical protein Csa_6G505970 [Cucumis sativus]										KGN48920.1		72186.5	6.81		16	40	0
		Protein Group
		PREDICTED: uncharacterized protein LOC101221744										XP_004134858.1		72186.5		6.8099
		[Cucumis sativus]														999427
																7954
Project 1\Sample project20170120\R17064-6																				50	of	73
		Peptide Information
		Calc. Mass		Obsrv. Mass	± da	± ppm	Start	End	Sequence			Ion	C. I. %	Modification						Rank	Result Type
							Seq.	Seq.				Score
		806.371		806.323	-0.0483	-60	30	36	QECADLK												Mascot
		810.396		810.341	-0.0548	-68	412	418	MKAMAAR					Oxidation (M)[1,4]							Mascot
		852.457		852.373	-0.0848	-99	519	525	TFRATEK												Mascot
		882.381		882.365	-0.0154	-17	82	89	CSGNGLMK					Carbamidomethyl (C)[1], Oxidation (M)[7]							Mascot
		915.533		915.473	-0.0602	-66	236	243	ILKEGPMK												Mascot
		933.452		933.408	-0.0448	-48	67	74	ETEQALDK												Mascot
		1427.79		1427.85	0.0563	39	527	538	MITPLVQLLDER												Mascot
		1548.79		1548.68	-0.1173	-76	539	552	EAEVSKEACIALTK					Carbamidomethyl (C)[9]							Mascot
		1574.83		1574.96	0.128	81	324	336	QLHSRILHPMGNR					Oxidation (M)[10]							Mascot
		1574.83		1574.96	0.128	81	324	336	QLHSRILHPMGNR					Oxidation (M)[10]							Mascot
		1583.89		1583.79	-0.1018	-64	526	538	RMITPLVQLLDER												Mascot
		1585.79		1585.85	0.0597	38	198	212	EGKVEGQENAANAIR												Mascot
		1616.92		1616.84	-0.0875	-54	75	89	ALLLVLKCSGNGLMK					Carbamidomethyl (C)[8]							Mascot
		1632.92		1632.87	-0.0464	-28	75	89	ALLLVLKCSGNGLMK					Carbamidomethyl (C)[8], Oxidation (M)[14]							Mascot
		1632.92		1632.87	-0.0464	-28	75	89	ALLLVLKCSGNGLMK					Carbamidomethyl (C)[8], Oxidation (M)[14]							Mascot
		1683.99		1683.86	-0.1306	-78	67	81	ETEQALDKALLLVLK												Mascot
		1739.76		1739.89	0.1316	76	21	36	AADEATSCKQECADLK					Carbamidomethyl (C)[8]							Mascot
		1893.05		1893.09	0.0353	19	433	449	SITESRALLCFAVLLEK												Mascot
		2079.09		2079.07	-0.0178	-9	102	119	KSFSQLENSIGDVSWLLR												Mascot
	5	hypothetical protein Csa_2G295950 [Cucumis sativus]										KGN62070.1		28671	9.4		9	35	0
		Protein Group
		PREDICTED: uncharacterized protein LOC101208580										XP_004148437.1		28671		9.3999
		[Cucumis sativus]														996185
																3027
		Peptide Information
		Calc. Mass		Obsrv. Mass	± da	± ppm	Start	End	Sequence			Ion	C. I. %	Modification						Rank	Result Type
							Seq.	Seq.				Score
		869.484		869.413	-0.0711	-82	82	88	HLLTTER												Mascot
		879.393		879.344	-0.0491	-56	1	6	MANWWR					Oxidation (M)[1]							Mascot
		933.453		933.408	-0.0457	-49	228	235	NEVMPICK												Mascot
		949.448		949.409	-0.0387	-41	228	235	NEVMPICK					Oxidation (M)[4]							Mascot
		1083.55		1083.63	0.0802	74	132	140	IHRNEETGK												Mascot
		1088.5		1088.61	0.1064	98	165	174	GEEACPGLQK					Carbamidomethyl (C)[5]							Mascot
		1431.77		1431.73	-0.042	-29	224	235	LLSKNEVMPICK					Carbamidomethyl (C)[11]							Mascot
Project 1\Sample project20170120\R17064-6				1431.73																51	Mascot	of	73
		1628.81		1628.88	0.0758	47	165	180	GEEACPGLQKGGQLNK												Mascot
		2121.2		2121.16	-0.0385	-18	114	134	AGSGSSVLLESGSILPIKI												Mascot
									HR
		2225.29		2225.16	-0.1233	-55	110	131	LQIRAGSGSSVLLESGSIL												Mascot
									PIK
	6	hypothetical protein Csa_3G876050 [Cucumis sativus]										KGN60082.1		53059.8	6.23		9	34	0		17	0
		Protein Group
		PREDICTED: ACT domain-containing protein ACR2										XP_004136481.1		53059.8		6.23
		[Cucumis sativus]														190
																7349
		Peptide Information
		Calc. Mass		Obsrv. Mass	± da	± ppm	Start	End	Sequence			Ion	C. I. %	Modification						Rank	Result Type
							Seq.	Seq.				Score
		817.399		817.339	-0.0595	-73	20	26	INGPTCR					Carbamidomethyl (C)[6]							Mascot
		925.514		925.515	0.0008	1	397	404	AINAFYVK												Mascot
		1427.71		1427.85	0.1365	96	432	444	NETSPPSTPQITR												Mascot
		1430.71		1430.76	0.0577	40	316	326	KDNAFQEYFIR												Mascot
		1494.83		1494.75	-0.0804	-54	193	205	LANIEEHLSTVLR												Mascot
		1494.83		1494.75	-0.0804	-54	193	205	LANIEEHLSTVLR												Mascot
		1632.79		1632.87	0.0768	47	354	367	VCEGVRLELCANNR					Carbamidomethyl (C)[2]							Mascot
		1632.79		1632.87	0.0768	47	354	367	VCEGVRLELCANNR			17	0	Carbamidomethyl (C)[10]							Mascot
		1683.93		1683.86	-0.0705	-42	455	468	SQLERLSHNFIAIR												Mascot
		1739.83		1739.89	0.0543	31	246	259	DYDWTSESISRRPK												Mascot
		1771.75		1771.83	0.0731	41	27	41	VCIDNESMEDCTIVK					Carbamidomethyl (C)[2], Oxidation (M)[8]							Mascot
	7	hypothetical protein Csa_6G127390 [Cucumis sativus]										KGN46727.1		38170.8	8.52		9	31	0
		Peptide Information
		Calc. Mass		Obsrv. Mass	± da	± ppm	Start	End	Sequence			Ion	C. I. %	Modification						Rank	Result Type
							Seq.	Seq.				Score
		806.346		806.323	-0.0232	-29	264	270	NENMNGK												Mascot
		834.399		834.334	-0.0651	-78	156	162	TVDWEGK												Mascot
		1088.54		1088.61	0.066	61	198	205	YCTEKFLK					Carbamidomethyl (C)[2]							Mascot
		1207.61		1207.54	-0.0656	-54	92	101	RALDEGYEVR												Mascot
		1620.85		1620.91	0.0592	37	257	270	LTFIALRNENMNGK												Mascot
		1717.89		1717.9	0.0028	2	156	170	TVDWEGKVALIQCAK					Carbamidomethyl (C)[13]							Mascot
		1717.89		1717.9	0.0028	2	156	170	TVDWEGKVALIQCAK					Carbamidomethyl (C)[13]							Mascot
		1739.97		1739.89	-0.0761	-44	292	308	LAGQDANVTTVPVSVLR												Mascot
		2225.13		2225.16	0.0286	13	216	235	LCGFMQGLIGQYAVPILE					Oxidation (M)[5]							Mascot
									EK
Project 1\Sample project20170120\R17064-6																				52	of	73
		2462.29		2462.32	0.0364	15	271	291	LLTFAGPRAWTTQEVITL					Carbamidomethyl (C)[19]							Mascot
									CER
	8	PREDICTED: phosphatidylinositol/phosphatidylcholine										XP_011658950.1		70035.8	6.78		13	31	0
		transfer protein SFH13 isoform X2 [Cucumis sativus]
		Peptide Information
		Calc. Mass		Obsrv. Mass	± da	± ppm	Start	End	Sequence			Ion	C. I. %	Modification						Rank	Result Type
							Seq.	Seq.				Score
		807.378		807.32	-0.0576	-71	477	483	NVQSMGR					Oxidation (M)[5]							Mascot
		820.406		820.346	-0.0597	-73	362	368	VQMPSMK												Mascot
		852.395		852.373	-0.0228	-27	362	368	VQMPSMK					Oxidation (M)[3,6]							Mascot
		949.427		949.409	-0.0174	-18	607	613	DSQCQRR					Carbamidomethyl (C)[4]							Mascot
		1083.56		1083.63	0.0721	67	498	505	SLQFQFWK												Mascot
		1088.59		1088.61	0.0184	17	265	273	KMLWPAAQK					Oxidation (M)[2]							Mascot
		1188.57		1188.6	0.0266	22	326	335	GPWNDLDIMK												Mascot
		1188.57		1188.6	0.0266	22	326	335	GPWNDLDIMK												Mascot
		1201.72		1201.67	-0.0487	-41	283	293	IQVLESKSIGK												Mascot
		1207.66		1207.54	-0.1159	-96	574	583	IKSVEFDLEK												Mascot
		1430.78		1430.76	-0.011	-8	36	48	AINASNKFTHSLK												Mascot
		1533.84		1533.86	0.0215	14	93	104	LDDYHTLLRFLK												Mascot
		1629.03		1628.88	-0.1431	-88	484	497	VLISFWVKLVAVVR												Mascot
		1671.91		1671.88	-0.0227	-14	55	68	IDYRIPSVPIEDVR												Mascot
		1892.99		1893.09	0.0934	49	210	226	RICSTTTILDVQGLGMK					Carbamidomethyl (C)[3]							Mascot
	9	hypothetical protein Csa_1G677540 [Cucumis sativus]										KGN66754.1		6776.6	10.02		3	31	0		12	0
		Peptide Information
		Calc. Mass		Obsrv. Mass	± da	± ppm	Start	End	Sequence			Ion	C. I. %	Modification						Rank	Result Type
							Seq.	Seq.				Score
		903.53		903.541	0.0109	12	25	31	EIYLPLR												Mascot
		903.53		903.541	0.0109	12	25	31	EIYLPLR			12	0								Mascot
		1681.88		1682	0.1253	75	25	40	EIYLPLRSGSSTGSSK												Mascot
		1700.03		1699.9	-0.1338	-79	52	68	VVLSGSLVISSLIRGLS												Mascot
	10	hypothetical protein Csa_1G163120 [Cucumis sativus]										KGN64927.1		16051.6	11.34		7	30	0
		Peptide Information
		Calc. Mass		Obsrv. Mass	± da	± ppm	Start	End	Sequence			Ion	C. I. %	Modification						Rank	Result Type
							Seq.	Seq.				Score
		802.388		802.311	-0.0769	-96	8	13	MHLTER					Oxidation (M)[1]							Mascot
Project 1\Sample project20170120\R17064-6																				53	of	73
		861.497		861.556	0.0589	68	116	122	RLGLQMK					Oxidation (M)[6]							Mascot
		903.483		903.541	0.0579	64	1	7	MNTLPRR					Oxidation (M)[1]							Mascot
		903.483		903.541	0.0579	64	1	7	MNTLPRR					Oxidation (M)[1]							Mascot
		1188.64		1188.6	-0.0461	-39	98	107	SGQMILIPWK					Oxidation (M)[4]							Mascot
		1188.64		1188.6	-0.0461	-39	98	107	SGQMILIPWK					Oxidation (M)[4]							Mascot
		1316.74		1316.63	-0.1103	-84	98	108	SGQMILIPWKK					Oxidation (M)[4]							Mascot
		1316.74		1316.63	-0.1103	-84	98	108	SGQMILIPWKK					Oxidation (M)[4]							Mascot
		1649.91		1649.89	-0.0216	-13	65	79	VLQTSSVLSISLQMK					Oxidation (M)[14]							Mascot
[truncated: 705 more rows]
